# Supplementary material for: Genome-wide association mapping reveals genetic loci underlying phenotypic variation in early root vigour improvement by osmopriming in Brassica napus L.
Source: Research Square preprint supplement (doi:10.21203/rs.3.rs-7137420/v1), 2025-07-21
Supplement: Supplementary file 1 [file 432268d4851a30d79a06d0f0.xlsx]

## Sheet: Table S1
Table S1 List of 228 spring-type Brassica napus L. accessions used in this study and their respective responses to osmopriming
					Relative response to osmopriming (%)
Entry Number	Name	Country of Origin	Donor	Harvest date	Radicle emergence	Root length	Root growth rate	Vigour index
1001_CR0162	Altex, Line 73 G 438	Canada	IPK genebank	2022-08-16	-12.903	20.1016	46.4333	4.60486
1002_CR0163	Andor	Canada	IPK genebank	2022-08-16	9.99547	31.7088	71.6063	44.8737
1004_CR0183	Bingo	Denmark	IPK genebank	2022-08-11	6.89958	50.5667	132.711	60.9552
1005_CR0234	Lisonne	Germany	IPK genebank	2022-08-16	14.8155	38.6029	69.1027	59.1376
1006_CR0235	Conny	Sweden	IPK genebank	2022-08-10	3.12367	69.5832	122.73	74.8804
1007_CR0270	Bronowski	Poland	IPK genebank	2022-08-16	72.2233	112.318	193.093	265.66
1008_CR0271	Brutor, R-69-6	France	IPK genebank	2022-08-16	23.0809	89.4737	100.277	133.206
1010_CR0303	Duplo	Germany	IPK genebank	2022-08-01	0.00566669	146.67	158.586	146.684
1011_CR0317	Erglu	Germany	IPK genebank	2022-08-16	12.5018	123.104	149.925	150.996
1013_CR0581	Gisora	Germany	IPK genebank	2022-08-16	-9.37633	29.8795	53.4929	17.7015
1014_CR0583	Global	Sweden	IPK genebank	2022-08-01	0	39.0886	100.015	39.0886
1015_CR0624	Golden	Canada	IPK genebank	2022-08-10	-9.6737	27.262	44.7557	14.9511
1017_CR0633	Gulle	Sweden	IPK genebank	2022-08-01	0	20.4706	79.5021	20.4706
1022_CR0680	Kubanskij	Soviet Union	IPK genebank	2022-08-01	6.66969	100.087	146.392	113.433
1023_CR0704	Liho	Germany	IPK genebank	2022-08-03	3.02905	23.2512	63.0772	26.9845
1024_CR0724	Lirasol	Germany	IPK genebank	2022-08-10	6.89372	66.6756	93.5979	78.1658
1027_CR0764	Maris Haplona	Great Britain	IPK genebank	2022-08-01	26.9256	143.589	198.016	209.176
1028_CR0765	Marnoo	Australia	IPK genebank	2022-08-01	-21.2137	56.3295	89.1079	23.1662
1029_CR0775	Midas	Canada	IPK genebank	2022-08-01	13.7933	35.0745	73.0412	53.7057
1030_CR0790	Niclas	unknown	IPK genebank	2022-08-10	6.24734	31.8165	74.0607	40.0515
1032_CR0807	Nugget	Canada	IPK genebank	2022-08-03	3.02905	59.7824	155.064	64.6223
1033_CR0812	Olga	Sweden	IPK genebank	2022-08-10	17.2402	108.439	179.825	144.375
1034_CR0814	Omega	Sweden	IPK genebank	2022-08-10	18.5241	149.042	191.536	195.175
1035_CR0832	Orriba	Poland	IPK genebank	2022-08-03	3.22439	72.9156	155.861	78.4911
1036_CR0844	Pivot	Canada	IPK genebank	2022-08-03	3.02905	86.1196	183.746	91.7573
1037_CR0861	Pura	Germany	IPK genebank	2022-08-03	28.0022	75.5719	134.893	124.736
1038_CR0881	Regent	Canada	IPK genebank	2022-08-10	3.33768	84.4494	126.238	90.6057
1039_CR0882	Regina, Svalöfs Regina	Sweden	IPK genebank	2022-08-10	39.1381	86.5539	120.753	159.568
1040_CR0883	Reston	Canada	IPK genebank	2022-08-10	25.0124	148.273	232.713	210.372
1042_CR0899	S 63 1024	unknown	IPK genebank	2022-08-03	161.54	74.325	108.76	355.93
1045_CR0992	Sv 705152	Sweden	IPK genebank	2022-08-16	0	22.4126	73.311	22.4126
1047_CR1000	Sv 75716	Sweden	IPK genebank	2022-08-01	34.7919	72.0334	146.609	131.887
1048_CR1011	Tanka	Canada	IPK genebank	2022-08-10	6.66969	128.987	196.452	144.26
1049_CR1014	Target	Canada	IPK genebank	2022-08-10	0	41.5756	76.9454	41.5756
1051_CR1023	Toro	France	IPK genebank	2022-08-10	0	47.6048	82.2243	47.6048
1052_CR1025	Tower	Canada	IPK genebank	2022-08-08	55.0021	96.8124	150.767	205.063
1053_CR1027	Triton, Oac Triton	Canada	IPK genebank	2022-08-10	26.9173	65.3037	103.107	109.799
1054_CR1029	Valecovska	Czech Republik	IPK genebank	2022-08-16	112.495	10.9533	44.8044	135.77
1055_CR1032	Vega	Denmark	IPK genebank	2022-08-01	37.508	125.576	189.167	210.185
1056_CR1050	Janetzkis Weihenstephaner	Germany	IPK genebank	2022-08-16	0	51.47	91.8241	51.47
1057_CR1051	Wesbell	Australia	IPK genebank	2022-08-10	92.8597	141.149	132.353	365.08
1059_CR1054	Westar	Canada	IPK genebank	2022-08-01	21.4329	101.929	183.312	145.209
1061_CR1056	Willi	Denmark	IPK genebank	2022-08-16	40.9165	111.286	132.276	197.737
1062_CR1099	Ww 1273	Sweden	IPK genebank	2022-08-10	17.8556	75.2636	98.7377	106.558
1064_CR1101	Ww 1289	Sweden	IPK genebank	2022-08-10	10.3464	58.4812	74.5954	74.8784
1065_CR1170	Zachodni	Poland	IPK genebank	2022-08-03	-3.02905	92.2892	128.677	86.4646
1066_CR1171	Zephyr	Canada	IPK genebank	2022-08-10	26.0828	38.4635	63.1874	74.5786
1068_CR1861	Line	unknown	IPK genebank	2022-08-10	61.1011	123.149	175.328	259.496
1069_CR1883	----	Soviet Union	IPK genebank	2022-08-03	14.2857	181.862	217.583	222.128
1070_CR1885	----	Ukraine	IPK genebank	2022-08-11	0.000333334	97.1676	158.747	97.1683
1071_CR1886	----	Russia	IPK genebank	2022-08-16	12.5018	50.0653	72.0231	68.8261
1072_CR1887	----	Belarus	IPK genebank	2022-08-10	19.222	78.3912	146.753	112.682
1073_CR2004	Profit	Canada	IPK genebank	2022-08-11	-12.5053	38.4236	77.8313	21.1133
1074_CR2005	Tribute	Canada	IPK genebank	2022-08-01	21.4255	43.9672	69.0183	74.8129
1075_CR2012	Kajsa	Sweden	IPK genebank	2022-08-10	106.247	91.6171	138.267	295.205
1076_CR2013	Korall	Sweden	IPK genebank	2022-08-16	-37.4982	73.8604	68.5245	8.66585
1077_CR2014	Granit	Sweden	IPK genebank	2022-08-10	13.3273	15.6172	56.866	31.0259
1078_CR2015	Puma	Sweden	IPK genebank	2022-08-10	-17.2422	-7.9118	0.89374	-23.7899
1079_CR2214	----	Cuba	IPK genebank	2022-08-10	-0.00103447	29.4643	42.2345	29.4629
1081_CR2256	----	unknown	IPK genebank	2022-08-16	-9.68092	27.3287	96.1437	15.0021
1082_CR2258	----	unknown	IPK genebank	2022-08-03	0	68.0562	112.689	68.0562
1085_CR2264	----	China	IPK genebank	2022-08-08	-6.67164	29.0588	32.505	20.4485
1087_CR2283	Topas	Sweden	IPK genebank	2022-08-16	-41.3799	129.324	148.453	34.4299
1088_CR2321	----	unknown	IPK genebank	2022-08-10	-3.22987	58.2639	70.6877	53.1522
1089_CR2412	Industry	Denmark	IPK genebank	2022-08-16	-33.3319	19.4786	35.7837	-20.3459
1091_CR2614	Cat.no.117	Soviet Union	IPK genebank	2022-08-16	22.2264	33.6804	53.5047	63.3927
1093_CR2633	----	Canada	IPK genebank	2022-08-16	-13.338	4.84232	8.14227	-9.1415
1094_CR2674	----	Hungary	IPK genebank	2022-08-03	3.12367	24.3694	73.5895	28.2543
1095_CR3017	Olga	Sweden	IPK genebank	2022-08-01	3.02905	65.1063	132.134	70.1074
1098_CR3023	Brutor	France	IPK genebank	2022-08-16	-9.68414	77.1153	103.31	59.9632
1099_CR3033	----	unknown	IPK genebank	2022-08-16	-3.22987	47.1259	52.5424	42.3739
1100_CR3034	----	Germany	IPK genebank	2022-08-10	17.2402	88.8959	140.479	121.462
1107_CR3254	----	China	IPK genebank	2022-08-10	0.00566669	97.8098	172.241	97.821
1108_CR3255	----	Germany	IPK genebank	2022-08-16	-3.33201	33.4244	54.3871	28.9787
1109_CR3256	----	Germany	IPK genebank	2022-08-10	-0.00629604	128.751	190.545	128.737
1110_CR3282	Hankkija's Lauri	Netherland	IPK genebank	2022-08-03	135.726	21.318	43.3132	185.977
1111_CR3283	Svaloefs Gulle	Sweden	IPK genebank	2022-08-10	20.0102	85.6568	129.416	122.807
1112_CR3284	Zephyr	Canada	IPK genebank	2022-08-01	47.616	98.0341	156.989	192.33
1113_CR3290	Sv Gulliver	Sweden	IPK genebank	2022-08-10	11.1125	70.0281	148.695	88.9225
1114_CR3292	Liraspa	Germany	IPK genebank	2022-08-10	42.117	128.78	157.709	225.135
1115_CR3301	Olivia	Sweden	IPK genebank	2022-08-10	10.3464	59.7695	103.947	76.2999
1117_CR3402	Nimbus	Denmark	IPK genebank	2022-08-16	-3.45272	57.2361	91.1193	51.8072
1120_CR3431	Mozart	Denmark	IPK genebank	2022-08-10	-9.37633	30.2511	66.1602	18.0384
1124_CR3504	Licontra	Germany	IPK genebank	2022-08-08	107.689	94.9573	112.37	304.905
1125_CR3505	Pavel	Germany	IPK genebank	2022-08-16	4.35361	23.1485	26.737	28.51
1126_CR3524	Cliff	Germany	IPK genebank	2022-08-10	-12.0019	65.9951	90.6952	46.0726
1128_CR3566	Pauline	Germany	IPK genebank	2022-08-01	3.56991	70.2328	142.42	76.31
1130_B0015821880	----	Germany	DSV-Breeding	2022-08-08	3.44686	48.7798	80.7007	53.908
1133_B0015821892	----	Germany	DSV-Breeding	2022-08-10	7.13982	94.5642	115.452	108.456
1136_B0015822275	----	Germany	DSV-Breeding	2022-08-10	7.14589	24.0426	52.6816	32.9066
1137_B0015822285	----	Germany	DSV-Breeding	2022-08-10	13.7933	59.7686	110.695	81.806
1138_B0015822408	----	Germany	DSV-Breeding	2022-08-01	-9.67866	50.6329	105.93	36.0537
1139_B0015822106	----	Germany	DSV-Breeding	2022-08-01	380.041	121.87	178.216	965.066
1140_B0015822096	----	Germany	DSV-Breeding	2022-08-08	-22.2201	82.6249	131.037	42.0454
1141_B0015822746	----	Germany	DSV-Breeding	2022-08-08	3.69578	77.3776	117.614	83.933
1142_B0015835312	----	Germany	DSV-Breeding	2022-08-10	114.305	111.998	175.777	354.321
1143_B0015822465	----	Germany	DSV-Breeding	2022-08-01	24.0038	99.266	150.279	147.097
1145_B0015829631	----	Germany	DSV-Breeding	2022-08-10	3.12242	36.0122	55.3714	40.259
1148_B0015829628	----	Germany	DSV-Breeding	2022-08-10	6.89958	49.012	91.1284	59.2933
1151_B0015835309	----	Germany	DSV-Breeding	2022-08-10	255.572	142.781	184.558	763.26
1152_B0015835310	----	Germany	DSV-Breeding	2022-08-16	128.585	44.3128	80.2288	229.878
1153_B0015835311	----	Germany	DSV-Breeding	2022-08-11	119.991	59.6026	122.618	251.111
1156_B0015822699	----	Germany	DSV-Breeding	2022-08-11	25.9287	76.8623	118.289	122.72
1157_B0015822772	----	Germany	DSV-Breeding	2022-08-16	17.8628	42.9954	77.9597	68.5383
1158_B0015823161	----	Germany	DSV-Breeding	2022-08-16	-39.2872	85.3412	127.155	12.5258
1159_B0015823213	----	Germany	DSV-Breeding	2022-08-16	17.3836	84.8713	147.73	117.009
1160_B0015830716	----	Germany	DSV-Breeding	2022-08-10	28.5761	63.2694	47.9484	109.925
1161_B0015823229	----	Germany	DSV-Breeding	2022-08-16	106.247	173.373	215.994	463.825
1162_B0015823230	----	Germany	DSV-Breeding	2022-08-16	15.3917	70.008	78.7551	96.1751
1163_B0015830726	----	Germany	DSV-Breeding	2022-08-16	40.0119	9.51734	13.6018	53.3373
1164_B0015830736	----	Germany	DSV-Breeding	2022-08-16	-11.1069	125.913	199.197	100.821
1165_B0015822569	----	Germany	DSV-Breeding	2022-08-10	45.4489	100.039	108.295	190.955
1166_B0015822475	----	Germany	DSV-Breeding	2022-08-11	-6.45427	40.9849	73.2264	31.8854
1173_B0015822156	----	Germany	DSV-Breeding	2022-08-10	20.8316	96.5749	138.683	137.525
1176_B0015822302	----	Germany	DSV-Breeding	2022-08-03	8.69983	53.4087	85.2551	66.755
1177_B0015823255	----	Germany	DSV-Breeding	2022-08-16	13.6388	41.7321	57.6776	61.0626
1178_B0015822340	----	Germany	DSV-Breeding	2022-08-10	30.0068	19.3584	44.418	55.1741
1181_B0015822418	----	Germany	DSV-Breeding	2022-08-03	3.7023	112.839	158.422	120.719
1182_B0015822428	----	Germany	DSV-Breeding	2022-08-01	14.8218	119.267	182.539	151.766
1184_B0015823674	----	Germany	DSV-Breeding	2022-08-16	-14.2861	4.26506	16.31	-10.6304
1185_B0015823833	----	Germany	DSV-Breeding	2022-08-10	29.1776	5.77925	38.3367	36.6431
1186_B0015823915	----	Germany	DSV-Breeding	2022-08-10	-10.7158	25.0168	69.2867	11.6203
1187_B0015823964	----	Germany	DSV-Breeding	2022-08-16	12.4947	34.9112	73.9951	51.768
1188_B0015824072	----	Germany	DSV-Breeding	2022-08-16	14.2927	84.6948	97.7829	111.093
1190_B0015824431	----	Germany	DSV-Breeding	2022-08-16	-3.12367	85.6798	120.378	79.8797
1191_B0015821875	----	Germany	DSV-Breeding	2022-08-16	73.3537	114.981	181.509	272.677
1192_B0015821883	----	Germany	DSV-Breeding	2022-08-10	45.4489	105.119	177.506	198.344
1193_B0015821958	----	Germany	DSV-Breeding	2022-08-16	-7.41044	42.8875	68.7201	32.2989
1194_B0015822179	----	Germany	DSV-Breeding	2022-08-10	-0.00629604	62.8844	109.157	62.8741
1195_B0015822264	----	Germany	DSV-Breeding	2022-08-10	19.9986	79.136	130.503	114.961
1198_B0015820617	----	Germany	DSV-Breeding	2022-08-10	-7.40461	22.439	71.6341	13.3729
1199_B0015820630	----	Germany	DSV-Breeding	2022-08-10	0	42.131	76.6794	42.131
1203_B0015820809	----	Germany	DSV-Breeding	2022-08-10	-7.68929	49.0691	99.2692	37.6067
1210_B0015822738	----	Germany	DSV-Breeding	2022-08-08	-9.6737	67.2915	111.999	51.1082
1212_B0015822842	----	Germany	DSV-Breeding	2022-08-10	-36.67	-21.1491	-7.21444	-50.0638
1213_B0015823163	----	Germany	DSV-Breeding	2022-08-10	-89.6553	-4.68565	28.9274	-90.14
1214_B0015823242	----	Germany	DSV-Breeding	2022-08-03	76.47	101.261	136.394	255.165
1215_B0015823117	----	Germany	DSV-Breeding	2022-08-10	20.8316	70.4954	135.726	106.012
1216_B0015825371	----	Germany	DSV-Breeding	2022-08-10	-36.6665	17.8944	46.0961	-25.3333
1218_B0015825408	----	Germany	DSV-Breeding	2022-08-10	3.56991	31.2981	70.6158	35.9853
1219_B0015825420	----	Germany	DSV-Breeding	2022-08-03	-10.0017	78.0418	149.403	60.2346
1220_B0015825444	----	Germany	DSV-Breeding	2022-08-03	13.0377	77.6582	117.464	100.821
1221_B0015825452	----	Germany	DSV-Breeding	2022-08-10	31.8213	58.8564	77.9649	109.407
1222_B0015825513	----	Germany	DSV-Breeding	2022-08-03	-25	59.9318	96.8527	19.9488
1223_B0015823318	----	Germany	DSV-Breeding	2022-08-16	29.1614	73.8449	110.569	124.54
1224_B0015830838	----	Germany	DSV-Breeding	2022-08-16	-3.99837	65.9605	108.363	59.3247
1225_B9000000714	----	Germany	DSV-Breeding	2022-08-03	45.4602	102.946	172.67	195.205
1226_B9000000718	----	Germany	DSV-Breeding	2022-08-16	-6.44914	86.4675	127.28	74.4419
1227_B9000000719	----	Germany	DSV-Breeding	2022-08-03	106.687	148.106	267.161	412.802
1228_B9000000491	----	Germany	DSV-Breeding	2022-08-10	-3.12367	81.2163	135.326	75.5557
1229_B9000000742	----	Germany	DSV-Breeding	2022-08-03	68.742	2.15114	18.1712	72.3719
1230_B9000000758	----	Germany	DSV-Breeding	2022-08-08	-7.40461	10.7916	37.6236	2.58788
1231_B9000000484	----	Germany	DSV-Breeding	2022-08-16	11.5405	84.1578	134.35	105.41
1232_B9000000490	----	Germany	DSV-Breeding	2022-08-10	6.89545	51.0925	106.625	61.511
1233_B9000000826	----	Germany	DSV-Breeding	2022-08-10	33.3327	19.2902	45.9407	59.0528
1234_B9000000487	----	Germany	DSV-Breeding	2022-08-10	-12.9066	72.5233	96.7922	50.2564
1235_B9000000774	----	Germany	DSV-Breeding	2022-08-03	0	42.7874	85.2607	42.7874
1236_B9000000754	----	Germany	DSV-Breeding	2022-08-11	24.9965	61.6078	101.628	102.004
1237_B9000000747	----	Germany	DSV-Breeding	2022-08-11	3.33182	27.1617	65.7367	31.3986
1239_B9000000493	----	Germany	DSV-Breeding	2022-08-03	13.3337	59.6115	120.354	80.8936
1240_B9000000737	----	Germany	DSV-Breeding	2022-08-08	-9.37727	63.0638	100.55	47.7729
1241_B9000000508	----	Germany	DSV-Breeding	2022-08-03	6.66364	37.8844	71.9371	47.0725
1242_B9000000709	----	Germany	DSV-Breeding	2022-08-08	3.12367	59.7481	102.608	64.7381
1243_B9000050248	----	Germany	DSV-Breeding	2022-08-08	-6.66969	25.4324	48.6453	17.0665
1244_B0015826247	----	Germany	DSV-Breeding	2022-08-16	6.89958	101.285	120.461	115.173
1246_B9000050277	----	Germany	DSV-Breeding	2022-08-16	-0.00629604	17.8211	42.6676	17.8137
1247_B9000050001	----	Germany	DSV-Breeding	2022-08-11	-3.33201	17.5044	59.4737	13.5891
1248_B0015826380	----	Germany	DSV-Breeding	2022-08-03	3.99837	80.0365	131.059	87.235
1250_B0015835051	----	Germany	DSV-Breeding	2022-08-11	0	77.4993	118.905	77.4993
1251_B0015835143	----	Germany	DSV-Breeding	2022-08-08	242.92	82.6403	172.407	526.309
1252_B0015835194	----	Germany	DSV-Breeding	2022-08-08	42.1043	82.5427	120.207	159.401
1254_B9000050309	----	Germany	DSV-Breeding	2022-08-16	39.1279	114.925	162.182	199.02
1255_B9000050284	----	Germany	DSV-Breeding	2022-08-11	73.3424	106.298	156.366	257.601
1256_B9000050292	----	Germany	DSV-Breeding	2022-08-16	21.7369	75.1109	103.865	113.175
1257_B9000050294	----	Germany	DSV-Breeding	2022-08-16	71.4268	85	99.6923	217.14
1258_20|5|83-17EP5	----	Germany	DSV-Breeding	2022-08-16	26.0828	51.6553	78.9621	91.2112
1259_21|5|83-501EP1	----	Germany	DSV-Breeding	2022-08-11	70.59	53.7098	67.5886	162.213
1260_21|5|83-441EP4	----	Germany	DSV-Breeding	2022-08-16	50.0039	105.961	196.313	208.949
1261_20|5|935-51010EP991	----	Germany	DSV-Breeding	2022-08-16	26.9173	89.4247	144.946	140.413
1262_20|5|83-622EP2	----	Germany	DSV-Breeding	2022-08-16	85.6969	151.703	128.411	367.405
1263_21|5|83-539EP2	----	Germany	DSV-Breeding	2022-08-11	43.4844	90.3386	128.982	173.106
1264_20|5|83-627EP8	----	Germany	DSV-Breeding	2022-08-11	116.704	56.7721	82.5616	239.732
1265_20|5|924-5059EP4	----	Germany	DSV-Breeding	2022-08-01	8.33063	32.6957	55.303	43.7501
1266_20|5|924-5079EP5	----	Germany	DSV-Breeding	2022-08-11	30.7702	20.7637	12.2226	57.923
1268_19|5|924-5067EP2	----	Germany	DSV-Breeding	2022-08-11	10.7097	26.7921	90.6675	40.3712
1269_B9000051371	----	Germany	DSV-Breeding	2022-08-03	37.4982	132.819	215.599	220.122
1270_B9000051353	----	Germany	DSV-Breeding	2022-08-03	-3.45272	62.2325	85.2533	56.631
1271_B9000051247	----	Germany	DSV-Breeding	2022-08-03	88.24	56.6527	102.226	194.883
1272_B9000051380	----	Germany	DSV-Breeding	2022-08-11	52.384	117.557	181.435	231.523
1273_B9000051397	----	Germany	DSV-Breeding	2022-08-03	15.3851	108.868	164.277	141.003
1274_B9000000148	----	Germany	DSV-Breeding	2022-08-11	14.2927	96.1703	128.073	124.208
1275_B9000000374	----	Germany	DSV-Breeding	2022-08-11	22.2233	52.9809	83.89	86.9782
1277_B9000051229	----	Germany	DSV-Breeding	2022-08-11	8.69983	68.5521	91.4531	83.2159
1278_B9000051267	----	Germany	DSV-Breeding	2022-08-08	17.8556	100.722	185.997	136.563
1279_B9000051269	----	Germany	DSV-Breeding	2022-08-08	25.9208	72.3619	136.155	117.04
1280_B9000051279	----	Germany	DSV-Breeding	2022-08-08	-6.25234	71.4588	119.119	60.7386
1281_B9000051392	----	Germany	DSV-Breeding	2022-08-01	10.3437	57.7637	86.0384	74.0823
1282_B9000051275	----	Germany	DSV-Breeding	2022-08-08	-13.7933	41.518	114.684	21.998
1283_B9000051307	----	Germany	DSV-Breeding	2022-08-08	21.7459	96.2097	151.827	138.877
1284_B9000051314	----	Germany	DSV-Breeding	2022-08-11	14.2857	128.613	198.509	161.272
1285_B9000052284	----	Germany	DSV-Breeding	2022-08-16	92.8363	125.166	132.216	334.202
1286_B9000000072	----	Germany	DSV-Breeding	2022-08-01	300	68.9039	118.519	575.616
1287_B9000051207	----	Germany	DSV-Breeding	2022-08-03	16.0003	132.781	223.204	170.026
1288_B9000000092	----	Germany	DSV-Breeding	2022-08-11	21.7369	83.3082	101.497	123.154
1289_B9000051329	----	Germany	DSV-Breeding	2022-08-16	39.1381	117.39	179.759	202.472
1290_B9000052289	----	Germany	DSV-Breeding	2022-08-11	25.9208	121.593	144.846	179.032
1291_B9000051262	----	Germany	DSV-Breeding	2022-08-16	76.47	140.183	169.242	323.852
1292_B9000051285	----	Germany	DSV-Breeding	2022-08-16	77.7694	140.389	211.418	327.338
1293_B9000051237	----	Germany	DSV-Breeding	2022-08-03	-17.2402	58.9883	102.005	31.5784
1294_B0015822482	----	Germany	DSV-Breeding	2022-08-01	43.4738	104.375	157.2	193.224
1295_B0015832101	----	Germany	DSV-Breeding	2022-08-11	57.8867	64.751	81.217	160.12
1296_B0015832103	----	Germany	DSV-Breeding	2022-08-16	72.2327	165.383	229.654	357.076
1297_B0015832094	----	Germany	DSV-Breeding	2022-08-11	99.9887	119.332	181.61	338.64
1298_B0015832095	----	Germany	DSV-Breeding	2022-08-16	52.94	59.6986	92.9653	144.243
1299_B0015832097	----	Germany	DSV-Breeding	2022-08-11	70.59	83.1867	161.558	212.498
1300_B0015832100	----	Germany	DSV-Breeding	2022-08-16	34.7919	71.493	104.993	131.159
1301_B9000001172	----	Germany	DSV-Breeding	2022-08-11	7.41091	82.9096	101.104	96.4649
1302_B0015832108	----	Germany	DSV-Breeding	2022-08-16	75	105.192	147.634	259.085
1303_B0015832106	----	Germany	DSV-Breeding	2022-08-16	55.0021	133.497	219.454	261.925
1304_B0016092198	----	Germany	DSV-Breeding	2022-08-11	9.67317	120.702	210.428	142.051
1305_B0015829708	----	Germany	DSV-Breeding	2022-08-11	7.1524	74.0188	94.4973	86.4653
1306_B0015829709	----	Germany	DSV-Breeding	2022-08-11	-3.56991	31.2236	39.41	26.5391
1307_B0016092523	----	Germany	DSV-Breeding	2022-08-11	120.027	45.6667	47.6945	220.506
1308_B0016092524	----	Germany	DSV-Breeding	2022-08-11	36.8558	26.6949	56.5964	73.3893
1309_B0015829711	----	Germany	DSV-Breeding	2022-08-08	70.59	83.8916	159.562	213.701
1310_17|805|635-1023EP1	----	Germany	DSV-Breeding	2022-08-11	78.5576	27.8871	40.718	128.352
1311_17|805|635-1107EP1	----	Germany	DSV-Breeding	2022-08-08	88.8931	160.538	233.825	392.138
1312_18|805|634-1091EP1	----	Germany	DSV-Breeding	2022-08-08	23.0809	173.341	287.402	236.431

## Sheet: Table S2
Table S2 SNP data in hapmap format of the 228 Brassica napus L. accessions used in this study
rs#	Allele	Chr	Pos	Strand	assembly#	center	protLSID	assayLSID	panelLSID	QCcode	1001_CR0162	1002_CR0163	1004_CR0183	1005_CR0234	1006_CR0235	1007_CR0270	1008_CR0271	1010_CR0303	1011_CR0317	1013_CR0581	1014_CR0583	1015_CR0624	1017_CR0633	1022_CR0680	1023_CR0704	1024_CR0724	1027_CR0764	1028_CR0765	1029_CR0775	1030_CR0790	1032_CR0807	1033_CR0812	1034_CR0814	1035_CR0832	1036_CR0844	1037_CR0861	1038_CR0881	1039_CR0882	1040_CR0883	1042_CR0899	1045_CR0992	1047_CR1000	1048_CR1011	1049_CR1014	1051_CR1023	1052_CR1025	1053_CR1027	1054_CR1029	1055_CR1032
Bn-A01-p1045881	T/C/-	A01	2304	+	NA	NA	NA	NA	NA	NA	T	T	C	C	T	T	C	C	T	T	C	T	C	C	T	T	C	T	T	Y	C	T	T	T	Y	T	T	C	T	C	T	T	C	C	T	T	T	T	T
Bn-A01-p1041947	A/G/-	A01	6482	+	NA	NA	NA	NA	NA	NA	G	G	A	A	G	G	A	A	G	G	A	G	A	A	G	G	A	G	G	R	A	G	G	G	R	G	G	A	G	A	G	G	A	A	G	G	-	G	G
Bn-A01-p1026631	A/C/-	A01	24011	+	NA	NA	NA	NA	NA	NA	C	C	A	A	C	C	A	A	C	C	A	A	A	A	C	C	A	C	C	M	A	A	C	A	M	C	C	A	C	A	C	C	A	A	C	C	C	C	C
Bn-scaff_15838_1-p694016	T/G/-	A01	28922	+	NA	NA	NA	NA	NA	NA	T	T	T	T	K	K	T	T	K	T	T	T	T	T	T	T	T	K	T	T	T	T	K	T	T	T	T	T	T	T	T	K	T	T	T	T	T	K	G
Bn-A01-p515600	A/C/-	A01	98316	+	NA	NA	NA	NA	NA	NA	A	-	A	A	M	C	A	A	C	A	A	A	A	A	A	A	A	C	A	A	A	A	C	A	A	A	A	A	A	A	A	A	A	A	C	A	C	A	C
Bn-A01-p1993302	A/G/-	A01	103884	+	NA	NA	NA	NA	NA	NA	G	G	G	A	G	G	G	A	G	G	G	A	A	A	G	G	R	G	G	R	A	G	G	G	R	G	G	A	G	A	A	G	A	A	A	R	G	G	G
Bn-A01-p2475676	A/C/-	A01	108704	+	NA	NA	NA	NA	NA	NA	C	C	C	C	C	M	C	C	M	C	C	C	C	C	C	C	C	M	C	C	C	C	C	C	C	C	C	C	C	C	C	A	C	C	C	C	C	C	C
Bn-A01-p2667691	A/G/-	A01	111131	+	NA	NA	NA	NA	NA	NA	G	G	A	G	G	A	A	A	A	G	G	A	G	G	A	G	A	A	G	G	A	G	G	G	G	G	G	G	G	G	G	A	G	G	A	G	G	A	A
Bn-A01-p2667767	A/G/-	A01	111207	+	NA	NA	NA	NA	NA	NA	A	A	G	A	A	G	G	G	G	A	A	G	A	A	G	A	G	-	A	A	G	A	A	A	A	A	A	A	A	A	A	G	A	A	G	A	R	G	G
Bn-A01-p2910752	A/G/-	A01	117276	+	NA	NA	NA	NA	NA	NA	G	G	A	-	G	A	A	A	A	G	A	A	A	-	A	G	A	R	A	G	A	G	G	G	G	G	G	-	G	-	G	A	-	-	A	G	G	G	A
Bn-A01-p2910608	A/G/-	A01	117420	+	NA	NA	NA	NA	NA	NA	A	A	G	-	G	A	A	G	R	A	A	G	G	-	G	A	G	A	G	A	G	A	G	R	A	A	A	-	A	-	A	A	-	-	G	A	A	A	G
Bn-A01-p2957869	T/C/-	A01	125723	+	NA	NA	NA	NA	NA	NA	C	C	T	T	C	C	C	T	Y	T	C	T	T	T	T	C	T	C	T	C	T	C	C	C	C	C	C	-	C	T	C	C	T	T	T	C	C	T	T
Bn-A01-p2915231	A/G/-	A01	162800	+	NA	NA	NA	NA	NA	NA	A	A	A	A	A	G	G	A	R	A	G	A	A	A	A	A	A	R	A	A	A	A	A	A	A	A	A	A	A	A	A	G	A	A	A	A	A	A	A
Bn-A01-p4027402	T/C/-	A01	180914	+	NA	NA	NA	NA	NA	NA	C	C	T	T	T	T	T	T	T	T	T	T	T	C	T	T	T	T	T	T	T	T	T	T	C	C	C	T	C	C	T	T	T	C	T	C	C	T	T
Bn-A01-p599910	T/G/-	A01	182679	+	NA	NA	NA	NA	NA	NA	G	-	G	G	K	T	G	G	T	G	G	G	G	G	G	G	G	G	G	G	G	G	T	G	G	G	G	G	G	G	G	G	G	G	G	G	-	G	T
Bn-A01-p609857	A/C/-	A01	198823	+	NA	NA	NA	NA	NA	NA	C	-	C	C	M	A	C	C	A	C	C	C	C	C	C	C	C	A	C	C	C	C	A	C	C	C	C	C	C	C	C	C	C	C	C	C	-	C	A
Bn-A01-p4041055	T/G/-	A01	204742	+	NA	NA	NA	NA	NA	NA	G	G	T	T	G	T	T	T	T	T	T	T	T	G	T	T	T	T	T	T	T	T	G	K	G	G	G	T	G	G	T	T	T	G	T	G	G	T	T
Bn-A01-p644410	T/C/-	A01	235192	+	NA	NA	NA	NA	NA	NA	T	-	T	Y	Y	C	T	T	C	T	T	T	T	T	T	T	T	C	T	T	T	T	C	T	T	T	T	T	T	T	T	T	T	T	C	T	-	T	C
Bn-A01-p648196	T/G/-	A01	238963	+	NA	NA	NA	NA	NA	NA	T	-	T	K	T	T	T	T	T	T	T	T	T	T	T	T	T	G	T	T	T	T	T	T	T	T	T	T	T	T	T	T	T	T	G	T	G	T	T
Bn-A01-p663088	A/G/-	A01	250051	+	NA	NA	NA	NA	NA	NA	A	-	A	A	R	G	A	A	G	A	A	A	A	A	A	A	A	G	A	A	A	A	G	A	A	A	A	A	A	A	A	-	A	A	A	A	G	-	G
Bn-A01-p5335218	T/C/-	A01	256671	+	NA	NA	NA	NA	NA	NA	T	T	T	T	T	T	C	T	T	C	T	T	C	T	T	T	Y	C	C	T	T	T	T	T	T	T	T	C	T	T	C	T	C	T	C	T	T	C	C
Bn-A01-p5335372	A/G/-	A01	256826	+	NA	NA	NA	NA	NA	NA	A	-	A	A	A	A	G	A	A	A	A	A	G	A	A	A	A	-	A	A	A	A	A	A	A	A	-	R	A	A	R	A	R	A	R	A	A	R	R
Bn-A01-p4985329	A/G/-	A01	265519	+	NA	NA	NA	NA	NA	NA	G	G	G	G	G	G	G	G	G	A	G	G	G	G	A	G	-	G	G	G	G	G	G	G	G	G	G	G	G	G	A	G	G	G	G	G	G	G	A
Bn-A01-p688355	T/C/-	A01	282228	+	NA	NA	NA	NA	NA	NA	C	C	C	C	C	C	C	C	C	C	C	C	C	C	C	C	C	T	C	C	C	C	C	C	C	C	C	C	C	C	C	C	C	C	C	C	-	C	C
Bn-A01-p5599369	A/G/-	A01	294062	+	NA	NA	NA	NA	NA	NA	A	A	A	G	A	A	G	G	R	A	G	G	A	A	A	A	A	A	G	A	A	A	A	A	A	A	A	G	A	A	A	G	A	A	A	A	A	A	G
Bn-A01-p5595319	T/G/-	A01	296156	+	NA	NA	NA	NA	NA	NA	T	T	T	G	T	T	G	G	K	T	G	G	T	T	T	T	K	T	G	T	T	T	T	T	T	T	T	G	T	T	T	G	T	T	T	T	T	T	G
Bn-A01-p704525	A/G/-	A01	304646	+	NA	NA	NA	NA	NA	NA	G	G	G	G	G	G	G	G	G	G	G	G	G	G	G	G	G	A	G	G	G	G	G	G	G	G	G	G	G	G	G	R	G	G	G	G	A	G	G
Bn-A01-p5570110	A/C/-	A01	319411	+	NA	NA	NA	NA	NA	NA	A	A	A	C	A	A	C	C	M	A	C	C	A	A	A	A	M	C	C	A	A	A	A	A	A	A	A	C	A	A	A	C	A	A	A	A	A	A	C
Bn-A01-p5550226	T/G/-	A01	335899	+	NA	NA	NA	NA	NA	NA	T	T	T	T	T	G	T	T	K	T	G	T	G	T	T	G	G	T	T	T	T	T	T	T	T	T	T	T	K	T	T	T	T	T	G	T	T	G	T
Bn-A01-p5732226	A/G/-	A01	350458	+	NA	NA	NA	NA	NA	NA	G	G	G	A	A	A	A	A	A	A	R	A	A	A	A	G	A	R	A	A	A	A	A	A	G	G	G	A	R	A	A	A	A	A	A	G	G	A	A
Bn-A01-p5731932	A/G/-	A01	350752	+	NA	NA	NA	NA	NA	NA	G	G	G	G	G	A	G	G	R	G	G	G	G	G	G	G	G	G	G	G	G	G	G	G	G	G	G	G	R	G	G	G	G	G	G	G	G	G	G
Bn-A01-p5731429	T/G/-	A01	351255	+	NA	NA	NA	NA	NA	NA	G	G	G	T	T	T	T	T	T	T	G	T	T	T	K	G	T	G	T	T	T	T	T	T	G	G	G	T	K	T	T	T	T	T	T	G	G	T	T
Bn-A01-p5730640	A/G/-	A01	352044	+	NA	NA	NA	NA	NA	NA	A	A	A	G	G	G	G	G	G	G	A	G	G	G	R	A	G	A	G	G	G	G	G	G	A	A	A	G	R	G	G	G	G	G	G	A	A	G	G
Bn-A01-p737560	T/G/-	A01	358468	+	NA	NA	NA	NA	NA	NA	T	T	T	K	T	T	T	T	T	T	G	G	G	T	T	T	T	T	T	T	T	G	T	G	T	T	T	T	T	T	T	T	T	T	G	T	-	T	T
Bn-A01-p739098	T/C/-	A01	360009	+	NA	NA	NA	NA	NA	NA	T	T	T	Y	T	T	T	T	T	T	C	-	C	T	T	T	T	T	T	T	T	C	T	C	T	T	T	T	T	T	T	T	T	T	C	T	-	T	T
Bn-A01-p5737901	A/G/-	A01	370504	+	NA	NA	NA	NA	NA	NA	A	A	A	G	G	G	G	G	G	G	A	G	G	G	R	A	G	A	G	G	G	G	G	G	A	A	A	G	R	G	G	G	G	G	G	A	A	G	G
Bn-A01-p7593180	T/C/-	A01	395780	+	NA	NA	NA	NA	NA	NA	T	T	T	C	T	C	-	T	Y	T	T	T	T	T	T	T	T	T	T	T	T	T	T	T	T	T	T	T	T	T	T	T	T	T	T	T	T	-	T
Bn-A01-p777123	T/G/-	A01	397553	+	NA	NA	NA	NA	NA	NA	T	T	T	T	G	G	T	T	G	G	T	T	T	T	G	T	T	G	T	G	T	G	G	G	T	T	T	T	T	T	T	T	T	T	G	T	G	T	G
Bn-A01-p778048	T/C/-	A01	398469	+	NA	NA	NA	NA	NA	NA	T	T	T	T	C	C	T	T	C	C	T	T	T	T	C	T	T	C	T	C	T	C	C	C	T	T	T	T	T	T	T	T	T	T	C	T	C	T	C
Bn-A01-p7825044	T/G/-	A01	418895	+	NA	NA	NA	NA	NA	NA	G	T	G	T	G	T	G	G	K	G	G	G	G	G	K	T	G	G	G	G	G	G	G	G	G	G	G	K	T	G	G	G	G	G	G	G	G	T	T
Bn-A01-p821328	A/G/-	A01	450140	+	NA	NA	NA	NA	NA	NA	A	A	A	A	G	G	A	A	G	G	A	A	A	A	G	A	A	A	A	G	A	G	G	G	A	A	A	A	A	A	A	A	A	A	A	A	A	A	G
Bn-scaff_15838_1-p517875	T/C/-	A01	500221	+	NA	NA	NA	NA	NA	NA	Y	Y	Y	C	T	T	C	C	T	C	C	C	C	C	C	C	C	-	C	T	C	T	T	T	C	Y	Y	C	Y	C	C	Y	C	C	C	Y	T	C	T
Bn-A01-p916852	T/C/-	A01	534177	+	NA	NA	NA	NA	NA	NA	C	C	C	C	T	T	C	C	T	T	T	C	T	C	T	C	C	T	C	C	C	C	T	C	C	C	C	C	C	C	C	Y	C	C	T	C	C	T	T
Bn-A01-p923356	T/C/-	A01	540994	+	NA	NA	NA	NA	NA	NA	C	C	C	T	T	T	C	C	T	T	T	C	T	C	T	C	C	T	C	T	C	T	T	T	C	C	C	C	C	C	C	Y	C	C	T	C	T	T	T
Bn-A01-p938887	A/G/-	A01	554681	+	NA	NA	NA	NA	NA	NA	G	G	G	G	A	A	G	G	-	A	A	G	A	G	A	G	G	A	G	A	G	A	A	A	G	G	G	G	G	G	G	R	G	G	A	G	G	A	A
Bn-A01-p939202	A/G/-	A01	554994	+	NA	NA	NA	NA	NA	NA	A	A	A	G	A	A	A	A	A	A	A	A	A	A	A	A	A	R	A	A	A	A	A	A	A	A	A	A	A	A	A	A	A	A	A	A	-	A	A
Bn-A01-p951341	A/C/-	A01	567036	+	NA	NA	NA	NA	NA	NA	A	A	A	C	C	C	A	A	C	A	C	A	C	A	A	A	A	C	A	A	A	A	C	A	A	A	A	A	A	A	A	M	A	A	A	A	A	C	C
Bn-A01-p970103	T/C/-	A01	588064	+	NA	NA	NA	NA	NA	NA	T	T	T	C	C	C	T	T	C	T	T	T	T	T	T	T	T	C	T	T	T	T	C	T	T	T	T	T	T	T	T	C	T	T	T	T	-	C	C
Bn-A01-p1012990	T/G/-	A01	631968	+	NA	NA	NA	NA	NA	NA	G	G	G	G	T	T	G	G	T	G	G	G	G	G	G	G	G	T	G	G	G	G	T	G	G	G	G	G	G	G	G	K	G	G	G	G	G	T	T
Bn-A01-p1056386	A/C/-	A01	640502	+	NA	NA	NA	NA	NA	NA	C	C	A	A	C	C	A	A	C	C	A	C	A	A	C	C	A	C	C	M	A	C	C	C	M	C	C	A	C	A	C	C	A	A	C	C	C	C	C
Bn-A01-p1062520	T/G/-	A01	647648	+	NA	NA	NA	NA	NA	NA	T	T	G	G	T	T	G	G	T	T	G	K	G	G	T	T	G	T	T	K	G	T	T	T	K	T	T	G	T	G	T	T	G	G	T	T	T	T	T
Bn-A01-p11543191	A/G/-	A01	652715	+	NA	NA	NA	NA	NA	NA	A	G	A	A	G	A	A	A	A	A	A	A	A	G	G	G	R	A	A	A	A	-	G	G	A	G	G	A	A	G	A	A	G	G	A	G	G	A	A
Bn-A01-p1067371	T/G/-	A01	652869	+	NA	NA	NA	NA	NA	NA	T	T	G	G	G	G	G	G	G	T	G	-	G	G	T	T	G	G	T	K	G	T	G	T	K	T	T	G	T	G	T	-	G	G	T	T	-	-	G
Bn-scaff_20646_1-p277005	T/C/-	A01	675389	+	NA	NA	NA	NA	NA	NA	T	T	T	T	T	T	T	T	T	T	T	T	T	T	T	T	T	T	T	T	T	T	T	T	T	T	T	T	T	T	T	T	T	T	T	T	T	T	T
Bn-A01-p1095733	A/G/-	A01	695488	+	NA	NA	NA	NA	NA	NA	G	G	A	A	G	G	A	A	G	G	A	R	A	A	G	G	A	R	G	R	A	G	G	G	R	G	G	A	G	A	G	G	A	A	G	G	-	A	G
Bn-A01-p1104187	T/C/-	A01	700541	+	NA	NA	NA	NA	NA	NA	T	T	T	C	T	T	T	T	T	T	C	T	C	T	T	T	T	T	T	Y	T	T	T	T	T	T	T	T	T	T	T	T	T	T	T	T	-	C	T
Bn-A01-p1119894	T/C/-	A01	717053	+	NA	NA	NA	NA	NA	NA	T	T	C	C	C	C	C	C	C	T	C	C	C	C	T	T	C	-	T	Y	C	C	C	C	Y	T	T	C	T	C	T	Y	C	C	T	T	T	C	C
Bn-A01-p1125565	T/G/-	A01	723009	+	NA	NA	NA	NA	NA	NA	T	T	G	G	T	T	G	G	T	T	G	G	G	G	T	T	G	-	T	K	G	G	T	G	K	T	T	G	T	G	T	T	G	G	T	T	-	G	G
Bn-A01-p1133447	A/G/-	A01	730624	+	NA	NA	NA	NA	NA	NA	G	G	A	A	G	G	A	A	G	G	A	A	A	A	G	G	A	G	G	R	A	A	G	A	R	G	G	A	G	A	G	G	A	A	G	G	-	A	A
Bn-A01-p1149351	A/G/-	A01	753032	+	NA	NA	NA	NA	NA	NA	-	G	A	G	A	A	A	A	A	G	G	A	G	A	G	G	A	-	G	R	A	G	A	G	R	G	G	A	G	A	A	R	A	A	G	G	A	G	G
Bn-A01-p1152359	T/C/-	A01	756045	+	NA	NA	NA	NA	NA	NA	Y	T	C	C	T	T	C	C	T	T	C	C	C	C	C	T	C	T	T	Y	C	T	T	T	Y	T	T	C	T	C	T	T	C	C	T	T	C	C	T
Bn-A01-p1152369	T/C/-	A01	756055	+	NA	NA	NA	NA	NA	NA	T	C	T	T	C	C	T	T	C	C	T	T	T	T	T	C	T	C	C	Y	T	C	C	C	Y	C	C	T	C	T	C	C	T	T	C	C	C	T	C
Bn-A01-p1175428	A/G/-	A01	774559	+	NA	NA	NA	NA	NA	NA	A	A	A	G	A	A	A	A	A	A	A	A	A	A	A	A	A	A	A	A	A	A	A	A	A	A	A	A	A	A	A	A	A	A	A	A	A	G	A
Bn-scaff_17721_1-p49987	A/C/-	A01	790023	+	NA	NA	NA	NA	NA	NA	C	C	C	C	C	A	C	A	A	C	C	C	C	C	C	A	C	A	C	C	C	C	C	C	C	C	C	A	A	C	C	A	C	C	C	C	C	C	A
Bn-A01-p1192928	T/C/-	A01	791408	+	NA	NA	NA	NA	NA	NA	T	T	T	T	C	C	T	T	C	T	T	Y	T	T	C	T	T	C	T	T	T	T	C	T	T	T	T	T	T	T	T	Y	T	T	T	T	C	C	C
Bn-A01-p1194009	A/G/-	A01	792483	+	NA	NA	NA	NA	NA	NA	G	R	G	A	A	A	G	A	A	-	A	A	A	A	A	A	A	A	G	A	A	A	A	A	A	G	G	A	G	A	A	A	A	G	A	G	-	A	G
Bn-A01-p1226475	T/C/-	A01	824240	+	NA	NA	NA	NA	NA	NA	C	C	C	C	C	C	C	C	C	C	C	C	C	C	C	C	C	C	C	C	C	C	C	C	C	C	C	C	C	C	C	C	C	C	C	C	C	T	C
Bn-A01-p1227023	A/C/-	A01	824790	+	NA	NA	NA	NA	NA	NA	A	A	A	A	A	A	A	A	A	A	A	A	A	A	A	A	A	A	A	A	A	A	A	A	A	A	A	A	A	A	A	A	A	A	A	A	-	C	A
Bn-A01-p1249847	A/G/-	A01	850387	+	NA	NA	NA	NA	NA	NA	G	G	G	G	A	A	G	G	A	G	G	G	G	G	G	G	G	A	G	G	G	G	A	G	G	G	G	G	G	G	G	R	G	G	G	G	-	G	G
Bn-A01-p17049439	A/G/-	A01	863810	+	NA	NA	NA	NA	NA	NA	A	A	A	G	G	G	G	A	G	A	G	G	G	A	A	A	-	A	G	A	A	G	G	A	G	A	A	-	G	A	A	A	G	G	A	A	A	A	G
Bn-A01-p1276486	T/G/-	A01	874438	+	NA	NA	NA	NA	NA	NA	T	T	T	T	T	T	T	T	T	T	T	T	T	T	T	T	T	T	T	T	T	T	T	T	T	T	T	T	T	T	T	T	T	T	T	T	T	T	T
Bn-A01-p1314194	A/C/-	A01	915451	+	NA	NA	NA	NA	NA	NA	A	A	A	A	C	C	A	A	C	A	A	A	A	A	A	A	A	-	A	A	A	A	C	A	A	A	A	A	A	A	A	M	A	A	A	A	C	A	C
Bn-A01-p1314440	A/G/-	A01	915697	+	NA	NA	NA	NA	NA	NA	G	G	G	G	A	A	G	G	A	G	G	G	G	G	G	G	G	A	G	G	G	G	A	G	G	G	G	G	G	G	G	-	G	G	G	G	G	G	A
Bn-A01-p1324586	T/C/-	A01	925769	+	NA	NA	NA	NA	NA	NA	Y	T	C	T	C	C	C	C	C	C	C	C	C	C	T	T	C	C	T	Y	C	C	C	C	Y	T	T	C	T	C	T	Y	C	C	T	C	-	T	C
Bn-A01-p1373827	T/G/-	A01	974935	+	NA	NA	NA	NA	NA	NA	G	G	G	T	G	G	G	G	G	G	G	G	G	G	G	G	G	-	G	G	G	G	G	G	G	G	G	G	G	G	G	G	G	G	G	G	-	G	T
Bn-A01-p1373838	A/G/-	A01	974946	+	NA	NA	NA	NA	NA	NA	A	A	A	G	A	A	A	A	A	A	A	A	A	A	A	A	A	-	A	A	A	A	A	A	A	A	A	A	A	A	A	A	A	A	A	A	-	A	G
Bn-A01-p1387174	A/G/-	A01	987889	+	NA	NA	NA	NA	NA	NA	R	-	G	A	G	G	G	G	G	-	A	G	A	G	G	A	G	G	A	R	G	G	G	G	R	A	A	G	A	G	G	R	G	G	G	G	G	A	G
Bn-A01-p1409723	A/G/-	A01	1006969	+	NA	NA	NA	NA	NA	NA	A	A	A	A	G	G	A	A	G	A	R	A	-	A	A	A	A	-	A	A	A	A	G	A	A	A	A	A	A	A	A	R	A	A	A	A	G	A	G
Bn-A01-p1423163	A/C/-	A01	1021287	+	NA	NA	NA	NA	NA	NA	A	A	A	A	C	C	A	A	C	A	A	M	A	A	C	A	A	C	A	M	A	A	C	A	A	A	A	A	A	A	C	M	A	A	C	A	C	A	A
Bn-A01-p1439621	T/C/-	A01	1035645	+	NA	NA	NA	NA	NA	NA	C	C	C	C	C	T	C	C	T	C	C	C	C	C	C	C	C	T	C	C	C	C	C	C	C	C	C	C	C	C	C	Y	C	C	C	C	T	C	C
Bn-A01-p1440009	T/G/-	A01	1036032	+	NA	NA	NA	NA	NA	NA	T	T	G	G	T	T	T	T	T	T	T	-	T	T	G	T	T	T	T	K	T	T	T	T	T	T	T	T	T	T	G	T	T	T	G	T	-	T	G
Bn-A01-p1449865	A/G/-	A01	1045916	+	NA	NA	NA	NA	NA	NA	G	G	G	G	G	A	G	G	A	G	G	G	G	G	G	G	G	R	G	G	G	G	G	G	G	G	G	G	G	G	G	R	G	G	G	G	G	G	G
Bn-A01-p1453156	T/C/-	A01	1048424	+	NA	NA	NA	NA	NA	NA	C	C	C	C	C	T	C	C	T	C	C	C	C	C	C	C	C	T	C	C	C	C	C	C	C	C	C	C	C	C	C	Y	C	C	T	C	-	C	T
Bn-A01-p1456256	A/G/-	A01	1051673	+	NA	NA	NA	NA	NA	NA	A	A	A	A	A	G	A	A	G	A	A	A	A	A	A	A	A	G	A	A	A	A	A	A	A	A	A	A	A	A	A	R	A	A	G	A	-	A	G
Bn-A01-p1476216	A/G/-	A01	1070537	+	NA	NA	NA	NA	NA	NA	G	G	A	A	G	G	G	G	G	G	G	G	G	G	G	G	G	G	G	R	G	G	G	G	G	G	G	G	G	G	A	G	G	G	G	G	A	G	G
Bn-scaff_15838_1-p1452641	A/G/-	A01	1179537	+	NA	NA	NA	NA	NA	NA	A	A	A	A	A	A	A	A	A	G	A	A	A	A	A	A	A	A	A	G	A	A	A	A	A	A	A	A	A	A	G	A	A	A	A	A	A	A	A
Bn-A01-p1661180	T/C/-	A01	1208671	+	NA	NA	NA	NA	NA	NA	T	T	C	T	T	C	T	C	C	C	T	C	T	C	C	T	Y	C	T	Y	C	T	T	T	T	T	T	C	T	C	C	C	C	C	C	T	-	T	T
Bn-A01-p1742846	A/G/-	A01	1289063	+	NA	NA	NA	NA	NA	NA	A	A	A	A	A	G	G	A	G	A	A	G	A	A	A	A	A	R	A	R	A	A	A	A	A	A	A	A	A	A	A	G	A	A	A	A	-	G	G
Bn-A01-p1745099	A/G/-	A01	1290704	+	NA	NA	NA	NA	NA	NA	G	G	G	G	G	A	A	G	A	A	G	R	G	G	G	G	G	-	G	G	G	G	G	G	G	G	G	G	G	G	G	A	G	G	G	G	A	A	A
Bn-A01-p1746226	T/G/-	A01	1291831	+	NA	NA	NA	NA	NA	NA	G	G	G	G	G	T	T	G	T	G	G	K	G	G	G	G	G	T	G	K	G	G	G	G	G	G	G	G	G	G	G	T	G	G	G	G	T	T	T
Bn-A01-p1768443	A/G/-	A01	1308411	+	NA	NA	NA	NA	NA	NA	A	A	A	A	A	G	G	A	G	A	A	R	A	A	A	A	A	R	A	R	A	A	A	A	A	A	A	A	A	A	A	G	A	A	A	A	A	A	G
Bn-A01-p1770482	A/C/-	A01	1310457	+	NA	NA	NA	NA	NA	NA	C	C	C	C	C	A	A	C	A	A	C	M	C	C	C	C	C	A	C	M	C	C	C	C	C	C	C	C	C	C	C	A	C	C	C	C	-	C	A
Bn-A01-p16127871	T/C/-	A01	1319010	+	NA	NA	NA	NA	NA	NA	C	C	C	T	T	T	T	C	T	C	T	T	T	C	C	C	Y	C	T	C	C	Y	T	C	T	C	C	Y	T	C	T	C	T	T	C	C	C	C	T
Bn-A01-p1823705	T/C/-	A01	1358952	+	NA	NA	NA	NA	NA	NA	C	C	C	C	C	C	C	C	C	T	T	C	C	C	C	C	C	Y	C	C	C	C	C	C	C	C	C	C	C	C	C	C	C	C	C	C	C	T	T
Bn-A01-p1831507	T/G/-	A01	1366450	+	NA	NA	NA	NA	NA	NA	G	G	G	G	G	-	G	G	G	G	T	-	G	G	G	G	G	T	G	G	G	G	G	G	G	G	-	G	G	G	G	G	G	G	G	G	-	G	-
Bn-A01-p1838960	T/C/-	A01	1372669	+	NA	NA	NA	NA	NA	NA	T	T	T	C	T	C	C	C	C	T	C	C	C	C	T	T	Y	Y	T	T	C	T	T	T	Y	T	T	C	T	C	T	C	C	C	T	C	T	C	C
Bn-A01-p1842079	T/G/-	A01	1375790	+	NA	NA	NA	NA	NA	NA	G	G	G	T	G	T	T	T	T	T	T	T	T	T	G	G	K	K	G	G	T	G	G	G	K	G	G	T	G	T	G	T	T	T	G	T	G	T	T
Bn-A01-p1842658	T/C/-	A01	1376367	+	NA	NA	NA	NA	NA	NA	C	C	C	T	C	T	T	T	T	T	T	T	T	T	-	C	Y	Y	C	C	T	C	C	C	Y	C	C	T	C	T	C	T	T	T	C	T	T	T	T
Bn-A01-p1864705	A/C/-	A01	1400752	+	NA	NA	NA	NA	NA	NA	C	C	C	A	C	A	C	A	A	A	C	A	A	A	C	C	M	A	C	M	A	C	C	C	M	C	C	A	C	A	C	A	A	A	C	A	A	A	A
Bn-A01-p17408107	A/G/-	A01	1402096	+	NA	NA	NA	NA	NA	NA	A	A	A	A	A	A	G	A	A	A	G	G	G	A	A	A	A	A	A	A	A	A	A	A	A	A	A	A	A	A	A	A	A	A	A	A	A	A	A
Bn-A01-p1880406	T/C/-	A01	1414503	+	NA	NA	NA	NA	NA	NA	C	C	C	T	C	T	C	T	T	C	T	T	T	T	C	C	T	T	C	-	T	C	C	C	Y	C	C	T	C	T	C	T	T	T	C	T	-	C	T
Bn-A01-p1890102	T/C/-	A01	1424620	+	NA	NA	NA	NA	NA	NA	C	C	C	T	C	T	C	T	T	C	T	T	T	T	C	C	Y	Y	C	Y	T	C	C	C	Y	C	C	T	C	T	C	T	T	T	C	Y	C	C	T
Bn-A01-p17382168	T/C/-	A01	1429345	+	NA	NA	NA	NA	NA	NA	C	C	C	T	C	T	T	C	T	C	T	T	T	C	C	C	C	C	C	C	C	C	C	C	T	C	C	C	T	C	C	C	C	C	C	C	C	C	T
Bn-A01-p17377721	T/G/-	A01	1433947	+	NA	NA	NA	NA	NA	NA	T	T	T	G	T	G	T	T	G	T	T	T	T	T	T	T	T	T	T	T	T	T	T	T	G	T	T	T	G	T	T	T	T	T	T	T	T	T	G
Bn-A01-p1951988	A/G/-	A01	1461636	+	NA	NA	NA	NA	NA	NA	G	G	G	A	G	A	G	A	A	G	A	A	G	A	G	G	R	R	G	R	A	G	G	G	R	G	G	A	G	A	A	A	A	A	A	R	G	G	A
Bn-A01-p1977270	T/C/-	A01	1482310	+	NA	NA	NA	NA	NA	NA	T	T	T	T	T	C	T	T	C	C	T	T	T	T	T	T	T	C	T	T	T	T	T	T	T	T	T	T	T	T	T	C	T	T	T	T	T	C	C
Bn-A01-p17326645	T/C/-	A01	1489283	+	NA	NA	NA	NA	NA	NA	C	C	C	T	T	T	C	C	T	C	C	C	C	C	C	C	C	T	C	C	C	-	T	C	T	C	C	C	T	C	C	C	T	T	C	C	C	C	T
Bn-A01-p2004336	A/G/-	A01	1502176	+	NA	NA	NA	NA	NA	NA	G	G	G	A	G	A	G	A	A	A	G	A	A	A	A	G	R	R	G	G	A	G	G	G	R	G	G	A	G	A	G	A	A	A	A	R	G	A	A
Bn-A01-p2025400	T/C/-	A01	1525039	+	NA	NA	NA	NA	NA	NA	T	T	T	C	T	T	T	C	T	T	T	C	C	C	C	T	Y	Y	T	T	C	T	T	T	Y	T	T	C	T	C	T	T	C	C	C	Y	T	T	T
Bn-A01-p17258931	A/G/-	A01	1530194	+	NA	NA	NA	NA	NA	NA	A	A	A	A	G	A	G	A	A	A	G	G	G	A	A	A	R	G	A	A	A	R	G	A	A	A	A	A	A	A	A	A	G	G	A	A	A	A	A
Bn-A01-p2042209	A/G/-	A01	1539200	+	NA	NA	NA	NA	NA	NA	G	G	G	A	G	A	G	A	A	A	G	A	A	A	A	G	G	A	G	G	A	G	G	G	G	G	G	A	G	A	G	A	A	A	A	R	R	A	A
Bn-A01-p2067006	T/G/-	A01	1559279	+	NA	NA	NA	NA	NA	NA	G	G	G	G	G	T	G	G	T	T	G	G	G	G	G	G	G	T	G	G	G	G	G	G	G	G	G	G	G	G	G	K	G	G	G	G	G	G	G
Bn-A01-p2069218	T/C/-	A01	1561518	+	NA	NA	NA	NA	NA	NA	T	T	T	T	T	C	T	T	C	C	C	T	T	T	T	T	T	Y	T	T	T	T	T	T	T	T	T	T	T	T	T	C	T	T	T	T	T	T	T
Bn-A01-p2069488	T/C/-	A01	1561788	+	NA	NA	NA	NA	NA	NA	T	T	T	T	T	C	T	T	C	C	T	T	T	T	T	T	T	Y	T	T	T	T	T	T	T	T	T	T	T	T	T	C	T	T	T	T	-	T	T
Bn-A01-p17294955	A/G/-	A01	1582495	+	NA	NA	NA	NA	NA	NA	G	G	G	G	G	G	A	G	G	G	A	A	A	G	G	G	G	G	G	G	G	G	G	G	G	G	G	G	G	G	G	G	G	G	G	G	G	G	G
Bn-A01-p2091322	T/G/-	A01	1582609	+	NA	NA	NA	NA	NA	NA	T	T	T	T	T	G	T	T	G	T	T	T	T	T	T	T	T	G	T	-	T	T	T	T	T	T	T	T	T	T	T	G	T	T	T	T	T	T	G
Bn-A01-p2094793	A/G/-	A01	1586633	+	NA	NA	NA	NA	NA	NA	G	G	G	G	A	A	G	G	A	G	A	G	G	G	G	G	R	R	G	R	G	G	A	G	G	G	G	G	G	G	G	A	G	G	A	G	G	G	A
Bn-A01-p2111978	T/C/-	A01	1599912	+	NA	NA	NA	NA	NA	NA	C	C	C	C	T	T	C	C	Y	T	T	C	C	C	C	C	C	Y	C	Y	C	C	T	C	C	C	C	C	C	C	C	T	C	C	C	C	C	C	T
Bn-A01-p2114552	T/C/-	A01	1602491	+	NA	NA	NA	NA	NA	NA	T	T	T	T	C	C	T	T	Y	T	C	T	T	T	T	T	Y	C	T	C	T	T	C	T	T	T	T	T	T	T	C	C	T	T	C	T	T	T	C
Bn-A01-p2114803	A/G/-	A01	1602742	+	NA	NA	NA	NA	NA	NA	A	A	A	A	G	G	A	A	R	A	G	A	A	A	A	A	R	G	A	G	A	A	G	A	A	A	A	A	A	A	G	G	A	A	G	A	R	A	G
Bn-A01-p17751647	A/G/-	A01	1626901	+	NA	NA	NA	NA	NA	NA	G	G	G	A	A	A	A	G	A	G	A	A	A	G	A	G	R	A	G	G	G	-	A	G	A	G	G	G	A	G	G	G	A	A	G	G	G	G	A
Bn-A01-p2148059	T/C/-	A01	1630377	+	NA	NA	NA	NA	NA	NA	T	T	T	T	T	C	T	T	Y	C	T	T	T	T	C	T	Y	C	T	Y	T	T	T	T	T	T	T	T	T	T	C	C	T	T	C	T	-	T	T
Bn-A01-p17771411	A/G/-	A01	1637129	+	NA	NA	NA	NA	NA	NA	G	G	G	A	A	A	A	G	A	G	A	A	A	G	A	G	-	A	G	G	G	-	A	G	A	G	G	G	A	G	G	G	A	A	G	G	G	G	A
Bn-A01-p2171217	A/G/-	A01	1656717	+	NA	NA	NA	NA	NA	NA	A	A	A	G	A	A	A	G	A	G	G	G	G	G	A	A	R	A	A	A	G	A	A	A	R	A	-	G	A	G	A	-	G	G	A	-	-	G	G
Bn-A01-p2187099	A/G/-	A01	1672657	+	NA	NA	NA	NA	NA	NA	G	G	G	A	G	A	G	A	R	A	A	A	G	A	G	G	R	A	A	R	A	G	G	G	R	G	G	A	G	A	G	A	A	A	G	R	G	A	G
Bn-A01-p2197976	T/C/-	A01	1680730	+	NA	NA	NA	NA	NA	NA	T	T	T	T	T	T	T	T	T	T	C	T	T	T	T	T	T	T	T	T	T	T	T	T	T	T	T	T	T	T	T	T	T	T	T	T	T	T	T
Bn-A01-p17881348	T/C/-	A01	1699841	+	NA	NA	NA	NA	NA	NA	T	T	T	C	C	C	T	T	C	T	T	C	T	T	C	T	Y	C	T	T	T	-	C	C	C	T	T	T	C	T	T	T	C	C	T	T	T	T	C
Bn-A01-p2242890	A/G/-	A01	1727139	+	NA	NA	NA	NA	NA	NA	A	A	A	A	A	G	G	A	-	A	A	A	A	A	A	A	A	R	A	A	A	A	A	A	A	A	A	-	A	A	A	G	A	A	A	A	-	-	A
Bn-A01-p2244327	A/G/-	A01	1728533	+	NA	NA	NA	NA	NA	NA	G	G	G	G	G	G	G	G	G	A	A	G	G	G	G	G	G	R	G	G	G	G	G	G	G	G	G	G	G	G	G	G	G	G	G	G	G	G	G
Bn-A01-p2245780	A/C/-	A01	1729966	+	NA	NA	NA	NA	NA	NA	C	C	C	C	C	C	C	C	C	A	A	C	C	C	C	C	C	M	C	C	C	C	C	C	C	C	C	C	C	C	C	C	C	C	C	C	C	C	C
Bn-A01-p2246373	T/C/-	A01	1730558	+	NA	NA	NA	NA	NA	NA	T	T	T	T	T	C	C	T	Y	C	C	T	T	T	T	T	T	C	T	T	T	T	T	T	T	T	T	T	T	T	T	C	T	T	T	T	T	T	T
Bn-A01-p2254072	T/G/-	A01	1737928	+	NA	NA	NA	NA	NA	NA	T	T	T	G	T	T	T	G	K	T	T	G	T	G	T	T	K	K	G	T	G	T	T	T	K	T	T	G	T	G	T	T	G	G	T	T	T	G	T
Bn-A01-p2254235	A/G/-	A01	1738091	+	NA	NA	NA	NA	NA	NA	G	G	G	A	G	G	G	A	R	G	G	A	G	A	G	G	R	R	A	G	A	G	G	G	-	G	G	A	G	A	G	G	A	A	G	G	G	A	G
Bn-A01-p2260859	T/C/-	A01	1744726	+	NA	NA	NA	NA	NA	NA	T	T	T	C	T	C	T	C	Y	C	C	C	T	C	T	T	Y	Y	C	C	C	T	T	T	Y	T	T	C	T	C	C	C	C	C	T	T	T	C	T
Bn-A01-p2261903	A/G/-	A01	1745775	+	NA	NA	NA	NA	NA	NA	A	A	A	G	A	A	A	G	A	A	G	G	A	G	A	A	R	A	G	G	G	A	A	A	R	A	A	G	A	G	G	A	G	G	A	A	A	G	A
Bn-A01-p2288902	T/C/-	A01	1765752	+	NA	NA	NA	NA	NA	NA	C	C	C	C	C	T	C	C	Y	Y	C	C	C	C	C	C	C	T	C	C	C	C	C	C	C	C	C	C	C	C	C	T	C	C	C	C	C	C	C
Bn-A01-p2291940	T/C/-	A01	1768759	+	NA	NA	NA	NA	NA	NA	C	C	C	T	C	C	T	T	C	T	T	Y	C	T	C	C	Y	Y	T	C	T	C	C	C	Y	C	C	T	C	T	C	C	T	T	C	C	C	T	C
Bn-A01-p2303308	A/G/-	A01	1775948	+	NA	NA	NA	NA	NA	NA	A	A	A	A	A	A	A	A	R	A	A	R	A	A	A	A	A	R	A	A	A	A	A	A	A	A	A	A	A	A	A	A	A	A	A	A	-	A	A
Bn-A01-p2306938	A/G/-	A01	1779641	+	NA	NA	NA	NA	NA	NA	G	G	G	A	G	G	A	A	R	A	A	A	G	A	G	G	R	G	A	G	A	G	G	G	R	G	G	A	G	A	G	G	A	A	G	G	G	A	G
Bn-A01-p2307144	A/G/-	A01	1779848	+	NA	NA	NA	NA	NA	NA	G	G	G	A	G	G	A	A	R	A	A	A	G	A	G	G	R	R	A	G	A	G	G	G	R	G	G	A	G	A	G	G	A	A	G	G	R	A	G
Bn-A01-p2311015	A/G/-	A01	1783685	+	NA	NA	NA	NA	NA	NA	A	A	A	A	A	A	A	A	R	G	A	R	A	A	A	A	A	R	A	A	A	A	A	A	A	A	A	A	A	A	A	A	A	A	A	A	A	A	A
Bn-A01-p2318972	T/C/-	A01	1793043	+	NA	NA	NA	NA	NA	NA	C	C	C	C	C	C	C	C	C	C	T	C	C	C	C	C	C	C	C	C	C	C	C	C	C	C	C	C	C	C	C	C	C	C	C	C	C	C	C
Bn-A01-p2323744	A/G/-	A01	1797827	+	NA	NA	NA	NA	NA	NA	G	G	G	A	G	A	A	A	R	A	G	-	G	A	G	G	R	A	A	G	A	G	G	G	R	G	G	A	G	A	G	A	A	A	G	G	-	A	G
Bn-A01-p2340048	A/G/-	A01	1819172	+	NA	NA	NA	NA	NA	NA	A	A	A	G	A	G	G	G	R	G	A	R	A	G	A	A	R	G	G	A	G	A	A	A	R	A	A	G	A	G	A	G	G	G	A	A	A	G	A
Bn-A01-p2340359	A/G/-	A01	1827218	+	NA	NA	NA	NA	NA	NA	A	A	A	G	A	G	G	G	R	G	A	R	A	G	A	A	R	G	G	A	G	A	A	A	R	A	A	G	A	G	A	G	G	G	A	A	A	G	A
Bn-A01-p2341408	T/C/-	A01	1827987	+	NA	NA	NA	NA	NA	NA	C	C	C	T	C	T	T	T	T	T	C	T	C	T	C	C	Y	T	T	C	T	C	C	C	Y	C	C	T	C	T	C	T	T	T	C	C	C	T	C
Bn-scaff_15838_1-p2366465	T/C/-	A01	1852788	+	NA	NA	NA	NA	NA	NA	T	T	T	C	T	T	C	C	Y	C	C	C	T	C	T	T	Y	T	C	T	C	T	T	T	Y	T	T	C	T	C	T	T	C	C	T	T	T	C	C
Bn-A01-p2393817	T/G/-	A01	1879671	+	NA	NA	NA	NA	NA	NA	T	T	T	T	G	G	T	T	G	G	G	-	G	T	G	T	K	K	T	G	T	T	G	T	T	T	T	T	T	T	G	G	T	T	G	T	T	T	T
Bn-A01-p2403471	A/G/-	A01	1894127	+	NA	NA	NA	NA	NA	NA	A	A	G	A	A	A	A	A	R	A	A	-	A	A	A	A	A	R	A	A	A	A	A	A	A	A	A	A	A	A	A	A	A	A	A	A	A	A	A
Bn-A01-p2457750	T/C/-	A01	1943675	+	NA	NA	NA	NA	NA	NA	C	C	T	C	T	T	C	C	T	C	C	C	T	C	C	C	-	T	C	T	C	C	T	C	C	C	C	C	C	C	T	T	C	C	T	C	Y	C	C
Bn-A01-p21219526	A/G/-	A01	1960222	+	NA	NA	NA	NA	NA	NA	A	A	G	G	G	A	G	A	A	A	G	A	G	A	A	A	R	A	A	G	A	G	G	G	A	A	A	A	A	A	G	G	A	G	A	A	A	A	A
Bn-A01-p21224647	A/C/-	A01	1965567	+	NA	NA	NA	NA	NA	NA	C	C	A	A	A	C	A	C	C	C	A	C	A	C	C	C	M	C	C	A	C	A	A	A	C	C	C	C	C	C	A	A	C	A	C	C	C	C	C
Bn-A01-p2504370	T/G/-	A01	1992550	+	NA	NA	NA	NA	NA	NA	T	T	T	K	T	K	T	T	-	T	K	-	K	K	T	T	T	K	K	T	T	T	T	T	T	T	T	T	T	K	T	K	K	K	T	T	T	K	K
Bn-A01-p19583736	T/G/-	A01	1993551	+	NA	NA	NA	NA	NA	NA	T	T	T	-	G	G	T	G	G	G	T	T	T	T	T	T	G	T	G	G	G	G	G	G	G	T	T	G	G	T	T	G	G	G	G	T	T	G	G
Bn-A01-p17839637	T/G/-	A01	2017799	+	NA	NA	NA	NA	NA	NA	G	G	G	T	G	T	G	G	T	G	G	G	G	G	G	G	G	G	G	G	G	G	G	G	T	G	G	G	T	G	G	G	G	G	G	G	G	G	T
Bn-A01-p17845660	T/C/-	A01	2021787	+	NA	NA	NA	NA	NA	NA	T	T	T	C	Y	C	C	T	C	T	C	Y	C	T	Y	T	Y	Y	T	T	T	Y	Y	Y	C	T	T	T	-	T	T	T	Y	Y	T	T	T	T	C
Bn-A01-p2533727	T/G/-	A01	2028654	+	NA	NA	NA	NA	NA	NA	T	T	G	G	T	G	G	G	G	G	G	G	G	G	G	T	K	K	G	T	G	T	T	T	K	T	T	G	T	G	T	G	G	G	T	T	T	G	G
Bn-A01-p2538180	A/G/-	A01	2035080	+	NA	NA	NA	NA	NA	NA	G	G	A	G	G	G	A	-	R	A	A	R	G	G	A	G	R	R	G	G	A	G	G	G	G	G	G	A	G	G	G	G	G	G	G	G	R	G	G
Bn-A01-p20147405	T/C/-	A01	2050245	+	NA	NA	NA	NA	NA	NA	C	C	C	C	C	C	T	T	C	C	T	C	T	C	C	C	Y	C	C	T	T	C	C	C	C	C	C	C	C	C	T	C	C	C	C	C	C	T	C
Bn-A01-p2569303	T/C/-	A01	2070693	+	NA	NA	NA	NA	NA	NA	C	C	C	T	C	T	T	T	Y	C	C	Y	C	T	T	C	T	Y	T	T	T	C	C	C	C	C	C	T	C	T	T	T	T	T	C	C	C	T	T
Bn-A01-p2574969	A/G/-	A01	2076602	+	NA	NA	NA	NA	NA	NA	G	G	G	G	G	R	G	R	R	G	A	G	G	G	G	-	G	A	G	G	G	G	G	G	G	G	G	G	G	G	G	A	G	G	G	G	R	G	G
Bn-A01-p2575497	A/G/-	A01	2077123	+	NA	NA	NA	NA	NA	NA	A	A	A	G	A	G	G	G	R	G	G	G	A	G	G	A	G	R	G	A	G	A	A	A	A	A	A	G	A	G	A	G	G	G	A	A	-	G	G
Bn-A01-p2608660	A/C/-	A01	2115096	+	NA	NA	NA	NA	NA	NA	A	A	C	A	C	M	A	M	C	C	A	A	A	A	A	A	A	M	A	A	A	A	C	C	A	A	A	A	A	A	A	C	A	A	A	A	M	A	A
Bn-A01-p20482459	A/G/-	A01	2116587	+	NA	NA	NA	NA	NA	NA	A	A	A	G	G	A	G	G	A	G	G	G	G	G	G	G	G	G	G	G	G	G	G	G	A	G	G	G	A	G	G	G	G	G	G	A	G	G	A
Bn-A01-p2624222	T/C/-	A01	2128844	+	NA	NA	NA	NA	NA	NA	C	C	C	T	C	T	T	T	Y	C	C	-	C	T	T	C	T	T	T	C	T	C	C	C	C	C	C	T	C	T	C	T	T	T	T	C	-	T	C
Bn-A01-p2626270	T/G/-	A01	2132864	+	NA	NA	NA	NA	NA	NA	G	G	T	T	T	T	G	K	T	T	T	T	G	T	T	G	K	T	T	G	G	G	T	T	G	G	G	T	G	T	G	T	T	T	T	G	G	T	T
Bn-A01-p2634563	T/C/-	A01	2141160	+	NA	NA	NA	NA	NA	NA	Y	Y	Y	Y	Y	T	T	T	Y	C	Y	Y	Y	Y	T	C	T	T	Y	Y	T	Y	C	Y	Y	Y	Y	Y	Y	Y	Y	T	Y	Y	T	Y	T	T	Y
Bn-A01-p2713528	T/G/-	A01	2220656	+	NA	NA	NA	NA	NA	NA	T	T	G	T	T	T	G	-	T	T	G	G	G	T	T	T	K	K	T	T	G	T	T	T	T	T	T	T	T	T	T	T	T	T	T	T	T	T	T
Bn-A01-p2713583	T/G/-	A01	2220711	+	NA	NA	NA	NA	NA	NA	G	G	T	G	G	G	T	-	G	G	T	-	T	G	G	G	K	K	G	G	T	G	G	G	G	G	G	G	G	G	G	G	G	G	G	G	G	G	G
Bn-scaff_15838_5-p468773	A/G/-	A01	2222142	+	NA	NA	NA	NA	NA	NA	G	G	A	A	G	R	A	A	R	A	A	A	G	A	A	G	A	A	A	A	A	G	G	G	G	G	G	A	G	A	A	A	A	A	A	G	R	G	A
Bn-scaff_15879_1-p426186	A/G/-	A01	2234546	+	NA	NA	NA	NA	NA	NA	R	R	R	G	R	-	R	G	G	A	R	A	G	A	A	A	G	A	A	A	R	R	R	R	R	A	A	-	R	A	G	-	G	R	A	R	A	-	-
Bn-A01-p21079129	T/G/-	A01	2291066	+	NA	NA	NA	NA	NA	NA	T	T	T	T	T	T	T	T	T	G	T	G	T	G	G	G	T	G	G	G	T	T	T	T	T	G	G	T	T	G	T	T	T	T	G	T	G	G	T
Bn-A01-p21079348	A/C/-	A01	2291285	+	NA	NA	NA	NA	NA	NA	C	C	C	C	C	C	C	C	C	C	C	C	C	C	C	C	C	C	A	C	C	C	C	C	C	C	C	C	C	C	C	C	C	C	C	C	C	C	C
Bn-A01-p21079774	A/C/-	A01	2291711	+	NA	NA	NA	NA	NA	NA	A	A	A	A	A	A	A	A	A	C	A	C	A	C	C	C	A	C	C	C	A	A	A	A	A	C	C	A	A	C	A	A	A	A	C	A	C	C	A
Bn-A01-p21079909	T/C/-	A01	2291846	+	NA	NA	NA	NA	NA	NA	C	C	C	C	C	C	C	C	C	T	C	T	C	T	T	T	C	T	T	T	C	C	C	C	C	T	T	C	C	T	C	C	C	C	T	C	T	T	C
Bn-A01-p21103014	T/G/-	A01	2307725	+	NA	NA	NA	NA	NA	NA	G	G	G	T	T	G	T	T	G	G	T	G	T	G	G	G	K	G	G	G	T	T	T	G	G	G	G	T	G	G	T	T	G	G	G	G	G	G	G
Bn-A01-p21107496	A/G/-	A01	2313364	+	NA	NA	NA	NA	NA	NA	A	A	G	G	G	A	G	G	A	A	G	A	G	A	A	A	R	A	G	A	G	G	G	A	A	A	A	G	A	A	G	G	A	A	A	A	A	A	A
Bn-A01-p2841043	T/G/-	A01	2350166	+	NA	NA	NA	NA	NA	NA	G	G	G	G	G	G	G	G	K	G	T	T	G	G	T	G	G	G	G	G	G	G	G	G	G	G	G	G	G	G	G	G	G	G	G	G	G	T	G
Bn-A01-p22841111	A/G/-	A01	2355676	+	NA	NA	NA	NA	NA	NA	G	G	G	G	G	G	G	G	G	G	G	G	G	G	G	G	G	G	G	G	G	G	G	G	G	G	G	G	G	G	G	G	G	G	G	G	G	G	G
Bn-A01-p2873007	A/G/-	A01	2375378	+	NA	NA	NA	NA	NA	NA	G	G	G	A	G	G	G	G	G	G	G	G	G	A	A	G	G	R	G	G	G	G	G	G	G	G	G	A	G	A	G	G	A	A	A	G	R	A	G
Bn-A01-p23111844	T/C/-	A01	2384603	+	NA	NA	NA	NA	NA	NA	T	T	C	T	C	T	T	C	T	C	C	C	C	C	C	T	C	C	C	C	C	C	C	C	T	T	T	C	T	C	C	T	C	C	C	T	T	T	T
Bn-A01-p2884934	A/G/-	A01	2388920	+	NA	NA	NA	NA	NA	NA	A	A	A	-	A	G	A	R	R	G	G	A	A	-	A	A	A	R	A	A	A	A	A	A	A	A	A	-	A	-	A	G	-	-	A	A	A	A	A
Bn-A01-p23103120	A/G/-	A01	2389313	+	NA	NA	NA	NA	NA	NA	A	A	G	A	G	A	A	G	A	G	G	G	G	G	G	A	G	G	G	G	G	G	G	G	A	A	A	G	A	G	G	A	G	G	G	A	A	A	A
Bn-A01-p2891863	A/G/-	A01	2395849	+	NA	NA	NA	NA	NA	NA	A	A	A	A	A	A	A	A	A	G	G	A	A	A	A	A	A	R	A	A	A	A	A	A	A	A	A	-	A	A	A	A	-	A	G	A	A	G	A
Bn-A01-p2897071	A/C/-	A01	2401390	+	NA	NA	NA	NA	NA	NA	C	C	C	C	C	A	A	C	M	A	A	C	C	C	C	C	C	M	C	C	C	C	C	C	C	C	C	C	C	C	C	A	C	C	C	C	C	C	C
Bn-A01-p23087044	T/C/-	A01	2401907	+	NA	NA	NA	NA	NA	NA	C	C	T	C	T	C	C	T	C	T	T	T	T	T	T	C	T	T	T	T	T	T	T	T	C	C	C	T	C	T	T	C	T	T	T	C	C	C	C
Bn-A01-p23080525	T/C/-	A01	2410016	+	NA	NA	NA	NA	NA	NA	T	T	C	T	C	T	T	C	T	C	C	C	C	C	C	T	C	C	C	C	C	C	C	C	T	T	T	C	T	C	C	T	C	C	C	T	T	T	T
Bn-A01-p23078554	T/C/-	A01	2411952	+	NA	NA	NA	NA	NA	NA	C	C	T	C	T	C	C	T	C	T	T	T	T	T	T	C	T	T	T	T	T	T	T	T	C	C	C	T	C	T	T	C	T	T	T	C	C	C	C
Bn-A01-p24646334	T/C/-	A01	2442368	+	NA	NA	NA	NA	NA	NA	T	T	C	T	C	T	C	T	T	T	C	C	C	T	C	T	T	T	C	C	T	T	C	T	T	T	T	T	T	T	C	T	T	T	C	T	T	T	T
Bn-A01-p24636537	A/G/-	A01	2453798	+	NA	NA	NA	NA	NA	NA	A	A	A	A	A	A	G	A	A	G	A	G	G	G	A	A	R	G	G	A	A	G	A	G	G	A	A	A	A	G	G	A	A	G	G	A	A	A	A
Bn-A05-p16026452	A/G/-	A01	2458258	+	NA	NA	NA	NA	NA	NA	G	G	G	G	G	G	G	G	G	G	G	G	G	G	G	G	G	G	G	G	G	G	G	G	G	G	G	G	G	G	G	G	G	G	G	G	G	G	G
Bn-A01-p95718	A/G/-	A01	2465573	+	NA	NA	NA	NA	NA	NA	A	-	A	R	A	A	A	A	A	G	G	A	G	A	A	A	A	R	A	A	A	A	A	A	A	A	A	A	A	A	A	A	A	A	A	A	-	A	A
Bn-A01-p100441	T/C/-	A01	2468965	+	NA	NA	NA	NA	NA	NA	C	C	C	Y	C	C	C	C	C	T	T	C	T	C	C	C	C	-	C	C	C	C	C	C	C	C	C	C	C	C	C	C	C	C	C	C	-	C	C
Bn-A01-p100693	T/C/-	A01	2469216	+	NA	NA	NA	NA	NA	NA	C	C	C	Y	C	C	C	C	C	T	T	C	T	C	C	C	C	-	C	C	C	C	C	C	C	C	C	C	C	C	C	C	C	C	C	C	-	C	C
Bn-A01-p101094	A/C/-	A01	2469620	+	NA	NA	NA	NA	NA	NA	C	C	A	M	M	A	A	A	A	C	C	A	C	C	C	A	A	-	C	A	A	C	A	C	M	A	A	A	C	C	A	M	A	A	A	A	-	A	A
Bn-A01-p108136	A/G/-	A01	2489554	+	NA	NA	NA	NA	NA	NA	G	G	A	R	A	A	A	A	A	G	G	A	G	G	A	A	A	A	G	A	A	R	A	G	R	A	A	A	G	G	-	R	-	A	A	A	G	A	A
Bn-A01-p120225	A/C/-	A01	2501673	+	NA	NA	NA	NA	NA	NA	A	A	A	A	C	C	A	A	A	A	A	A	A	A	C	A	A	C	A	A	A	M	C	A	A	A	A	A	A	A	A	A	A	A	A	A	A	A	C
Bn-A01-p24920662	A/G/-	A01	2520447	+	NA	NA	NA	NA	NA	NA	A	A	G	G	R	A	G	A	R	G	G	G	G	A	A	A	G	G	A	G	G	G	A	G	G	A	A	G	A	G	A	A	A	G	A	A	A	A	A
Bn-A01-p147360	A/G/-	A01	2529282	+	NA	NA	NA	NA	NA	NA	A	-	A	R	A	A	A	A	A	G	A	A	A	A	A	A	A	A	A	A	A	A	A	A	A	A	A	A	A	A	A	A	A	A	A	A	-	A	A
Bn-A01-p24915384	A/G/-	A01	2529707	+	NA	NA	NA	NA	NA	NA	G	G	G	G	G	G	A	G	G	A	G	G	G	G	G	G	R	G	G	G	G	A	G	A	G	G	G	G	G	G	G	G	G	G	G	G	G	G	G
Bn-A01-p147990	A/C/-	A01	2529914	+	NA	NA	NA	NA	NA	NA	C	C	A	M	M	A	A	A	A	C	A	A	A	C	C	A	A	C	C	A	A	M	A	A	M	A	A	A	C	C	A	M	A	A	A	A	-	A	A
Bn-A01-p161237	T/G/-	A01	2544476	+	NA	NA	NA	NA	NA	NA	T	T	T	K	T	T	T	T	T	G	T	T	T	T	T	T	T	T	T	T	T	T	T	T	T	T	T	T	T	T	T	T	T	T	T	T	T	T	T
Bn-A01-p176052	T/G/-	A01	2560144	+	NA	NA	NA	NA	NA	NA	G	G	G	K	T	G	G	G	G	T	G	G	G	G	T	G	G	G	G	G	G	-	G	G	G	G	G	G	G	G	G	G	G	G	G	G	G	G	G
Bn-A01-p178709	A/G/-	A01	2562774	+	NA	NA	NA	NA	NA	NA	A	A	A	A	R	G	A	A	A	A	A	A	A	A	A	A	A	G	A	A	A	A	G	A	A	A	A	A	A	A	A	A	A	A	A	A	-	A	G
Bn-A01-p207363	T/C/-	A01	2591458	+	NA	NA	NA	NA	NA	NA	T	-	C	C	Y	T	C	C	C	C	C	C	C	T	C	C	C	T	T	C	C	C	T	C	C	C	C	C	T	T	C	Y	C	C	C	C	-	C	T
Bn-A01-p235484	T/C/-	A01	2619078	+	NA	NA	NA	NA	NA	NA	T	-	C	C	C	C	C	C	C	C	C	C	C	T	C	C	C	-	T	C	C	C	C	C	C	C	C	C	T	T	C	-	C	C	C	C	-	Y	C
Bn-A01-p235781	T/C/-	A01	2619371	+	NA	NA	NA	NA	NA	NA	T	-	C	C	C	C	C	C	C	C	C	C	C	T	C	C	C	-	T	C	C	C	C	C	C	C	C	C	T	T	C	Y	C	C	C	C	-	Y	C
Bn-A09-p5033479	A/G/-	A01	2682928	+	NA	NA	NA	NA	NA	NA	A	A	G	R	A	G	G	A	G	A	G	A	G	A	A	G	A	G	A	A	A	A	A	A	A	A	A	A	A	A	A	A	A	A	A	A	A	A	A
Bn-A01-p324562	T/G/-	A01	2700421	+	NA	NA	NA	NA	NA	NA	T	K	T	T	T	T	T	T	T	T	T	T	T	T	T	T	T	K	T	T	T	T	T	T	T	T	T	T	T	T	T	T	T	T	T	T	G	T	T
Bn-A01-p3000989	T/C/-	A01	2712442	+	NA	NA	NA	NA	NA	NA	C	C	C	C	T	C	T	C	C	T	T	C	C	C	C	C	C	Y	C	T	C	C	T	Y	C	C	C	C	C	C	T	C	C	C	C	C	C	C	C
Bn-A01-p3070657	T/G/-	A01	2775858	+	NA	NA	NA	NA	NA	NA	T	T	T	T	T	G	G	T	K	G	G	T	T	T	T	T	T	K	T	T	T	T	T	T	T	T	T	T	T	T	G	G	T	T	T	T	T	T	T
Bn-A01-p3134159	T/C/-	A01	2837204	+	NA	NA	NA	NA	NA	NA	T	T	T	T	T	C	T	C	Y	T	T	T	T	T	T	T	T	C	T	T	T	T	T	T	T	T	T	T	T	T	T	C	T	T	T	T	T	C	T
Bn-A01-p3136468	A/G/-	A01	2839481	+	NA	NA	NA	NA	NA	NA	G	G	G	G	G	A	G	A	R	G	G	G	G	G	G	G	G	A	G	G	G	G	G	G	G	G	G	G	G	G	G	A	G	G	G	G	G	A	-
Bn-A01-p3137277	T/C/-	A01	2840290	+	NA	NA	NA	NA	NA	NA	C	C	C	C	C	T	C	T	Y	C	C	C	C	C	C	C	Y	Y	C	C	C	C	C	C	C	C	C	C	C	C	C	T	C	C	C	C	C	T	T
Bn-scaff_15838_5-p1043118	T/C/-	A01	2847759	+	NA	NA	NA	NA	NA	NA	T	T	T	T	T	T	T	T	T	T	T	T	T	T	T	T	T	Y	T	T	T	T	T	T	T	T	T	T	T	T	T	T	T	T	T	T	T	T	T
Bn-A01-p3173607	A/C/-	A01	2883501	+	NA	NA	NA	NA	NA	NA	A	A	A	A	A	A	M	A	A	M	A	A	A	A	A	A	A	A	A	A	A	A	A	A	A	A	A	A	A	A	A	A	A	A	A	A	A	A	A
Bn-A01-p3175614	A/G/-	A01	2885919	+	NA	NA	NA	NA	NA	NA	G	G	G	G	G	G	R	G	G	R	G	G	G	G	G	G	G	G	G	G	G	G	G	G	G	G	G	G	G	G	G	G	G	G	G	G	G	G	G
Bn-A01-p3226309	T/G/-	A01	2920700	+	NA	NA	NA	NA	NA	NA	G	G	G	G	G	G	T	G	G	T	G	G	G	G	G	G	G	G	G	G	G	G	G	G	G	G	G	G	G	G	G	T	G	G	G	G	-	T	T
Bn-A01-p3233247	A/G/-	A01	2921960	+	NA	NA	NA	NA	NA	NA	G	G	G	R	G	R	A	G	G	A	G	G	G	G	R	G	G	R	G	G	G	G	G	G	G	G	G	G	G	G	G	A	G	G	G	G	G	A	A
Bn-A01-p3233299	A/G/-	A01	2922012	+	NA	NA	NA	NA	NA	NA	A	A	A	A	A	A	G	A	A	G	A	A	A	A	A	A	A	A	A	A	A	A	A	A	A	A	A	A	A	A	A	G	A	A	A	A	-	G	G
Bn-A01-p3240780	T/G/-	A01	2922421	+	NA	NA	NA	NA	NA	NA	T	T	T	T	T	T	G	T	T	G	T	T	T	T	T	T	T	T	T	T	T	T	T	T	T	T	T	T	T	T	T	G	T	T	T	T	-	G	G
Bn-A01-p3306526	A/G/-	A01	2992971	+	NA	NA	NA	NA	NA	NA	A	A	A	A	A	A	A	A	A	A	A	A	A	A	A	A	A	A	A	A	A	A	A	A	A	A	A	A	A	A	A	A	A	A	A	A	A	A	G
Bn-A01-p3307173	T/C/-	A01	2993618	+	NA	NA	NA	NA	NA	NA	C	C	C	C	C	C	C	C	C	C	C	C	C	C	C	C	C	C	C	C	C	C	C	C	C	C	C	C	C	C	C	C	C	C	C	C	-	C	T
Bn-A01-p3378332	A/G/-	A01	3044599	+	NA	NA	NA	NA	NA	NA	A	A	G	G	G	G	A	A	R	A	G	A	A	A	A	A	R	G	G	G	G	A	G	R	A	A	A	G	A	A	A	A	G	A	G	A	A	A	A
Bn-A01-p3567127	T/C/-	A01	3239160	+	NA	NA	NA	NA	NA	NA	T	T	C	T	C	Y	T	C	Y	T	C	T	C	T	T	T	Y	C	C	C	C	T	C	Y	T	T	T	C	T	T	C	C	C	T	C	T	T	T	C
Bn-A01-p3573045	A/G/-	A01	3245063	+	NA	NA	NA	NA	NA	NA	A	A	G	A	G	-	A	G	R	A	G	A	G	A	A	A	R	G	G	G	G	A	G	R	A	A	A	G	A	A	G	G	G	A	G	A	R	A	G
Bn-A01-p3586744	T/C/-	A01	3253994	+	NA	NA	NA	NA	NA	NA	C	C	T	C	T	C	C	T	Y	C	C	C	C	C	C	C	Y	C	C	C	T	C	T	Y	C	C	C	C	C	C	C	C	T	C	C	C	C	C	C
Bn-A01-p3597929	A/G/-	A01	3265150	+	NA	NA	NA	NA	NA	NA	G	G	G	A	G	R	G	G	R	G	A	A	A	A	G	G	R	A	A	A	G	G	G	G	G	G	G	A	G	A	A	A	G	A	A	G	G	G	A
Bn-A01-p3598097	T/C/-	A01	3265318	+	NA	NA	NA	NA	NA	NA	T	T	T	C	T	C	T	T	Y	T	C	C	C	C	T	T	Y	C	C	C	T	T	T	T	T	T	T	C	T	C	C	C	T	C	C	T	T	T	C
Bn-A01-p3619975	T/C/-	A01	3282715	+	NA	NA	NA	NA	NA	NA	T	T	T	C	C	T	C	T	Y	C	C	C	C	C	T	T	Y	T	C	C	T	T	C	Y	T	T	T	C	T	C	C	C	T	C	C	T	T	T	C
Bn-A01-p3626821	A/G/-	A01	3289581	+	NA	NA	NA	NA	NA	NA	G	G	G	A	A	G	A	G	R	A	A	A	A	A	G	G	R	G	A	A	G	G	A	R	G	G	G	A	G	A	A	A	G	A	G	G	G	G	A
Bn-scaff_17978_1-p329567	A/C/-	A01	3294681	+	NA	NA	NA	NA	NA	NA	C	C	A	C	C	A	C	A	M	C	C	C	C	C	M	-	M	-	C	C	M	C	C	C	C	C	C	C	C	C	C	C	A	C	A	C	C	A	C
Bn-A01-p3644770	A/G/-	A01	3312635	+	NA	NA	NA	NA	NA	NA	G	G	A	G	G	A	A	G	G	A	G	G	G	G	A	A	R	A	G	G	A	G	G	G	G	G	G	G	G	G	A	G	A	G	A	G	G	A	G
Bn-A01-p3713266	T/G/-	A01	3359152	+	NA	NA	NA	NA	NA	NA	G	G	G	G	G	G	G	G	G	G	G	G	G	G	G	T	G	G	G	G	G	G	G	G	G	G	G	G	G	G	G	G	G	G	G	G	G	G	G
Bn-A01-p3744726	A/G/-	A01	3397751	+	NA	NA	NA	NA	NA	NA	A	A	A	A	A	A	G	A	A	G	A	A	A	A	A	G	A	A	A	A	A	A	A	A	A	A	A	G	A	A	A	A	A	A	A	A	A	A	A
Bn-A01-p3782356	T/C/-	A01	3432062	+	NA	NA	NA	NA	NA	NA	C	C	C	C	C	C	T	T	Y	C	C	C	C	C	C	T	C	C	C	C	C	C	C	C	C	C	C	C	C	C	C	C	C	C	C	C	C	C	C
Bn-A01-p3789302	A/C/-	A01	3436321	+	NA	NA	NA	NA	NA	NA	C	C	C	C	C	C	A	A	M	C	C	C	C	C	C	A	C	C	C	C	C	C	C	C	C	C	C	C	C	C	C	C	C	C	C	C	C	C	C
Bn-A01-p3829785	T/C/-	A01	3456113	+	NA	NA	NA	NA	NA	NA	T	T	T	T	C	-	T	C	Y	C	T	T	C	T	T	C	T	C	T	T	T	T	C	Y	T	T	T	T	T	T	T	C	T	T	T	T	T	T	T
Bn-A01-p3859106	T/G/-	A01	3481957	+	NA	NA	NA	NA	NA	NA	T	T	T	T	G	K	G	G	K	G	T	T	G	T	G	G	T	G	T	T	T	T	G	K	T	T	T	G	T	T	G	G	G	T	G	T	T	T	T
Bn-A01-p3859610	A/G/-	A01	3482461	+	NA	NA	NA	NA	NA	NA	G	G	G	G	G	G	G	A	R	G	G	G	G	G	A	A	G	G	G	G	G	G	G	G	G	G	G	G	G	G	A	G	A	G	A	G	G	G	G
Bn-A01-p3939508	A/G/-	A01	3565041	+	NA	NA	NA	NA	NA	NA	G	G	A	G	G	A	A	A	R	A	G	G	G	G	G	A	G	A	G	G	A	G	G	G	G	G	G	A	G	G	G	G	G	G	G	G	G	G	G
Bn-A01-p4084366	T/C/-	A01	3747996	+	NA	NA	NA	NA	NA	NA	C	C	C	C	C	T	T	T	Y	C	T	C	T	C	C	T	C	T	C	T	C	T	C	Y	C	C	C	T	C	C	C	T	C	C	C	C	C	C	C
Bn-A01-p4084739	T/C/-	A01	3748369	+	NA	NA	NA	NA	NA	NA	T	T	T	T	T	T	T	T	T	T	T	T	T	T	T	T	T	T	T	T	T	T	T	T	T	T	T	T	T	T	T	T	T	T	T	T	T	T	T
Bn-A01-p4116110	A/G/-	A01	3794217	+	NA	NA	NA	NA	NA	NA	G	G	A	G	A	A	G	A	G	A	A	A	A	G	A	A	R	G	A	A	A	A	A	A	G	G	G	A	G	G	A	A	A	G	A	G	G	A	A
Bn-scaff_19193_1-p658050	T/G/-	A01	3828706	+	NA	NA	NA	NA	NA	NA	G	G	G	G	G	G	G	G	G	G	G	G	G	G	G	G	G	G	G	G	G	G	G	G	G	G	G	G	G	G	G	G	G	G	G	G	G	G	G
Bn-scaff_19193_1-p657997	A/G/-	A01	3828759	+	NA	NA	NA	NA	NA	NA	G	G	G	G	G	G	G	G	G	G	G	G	G	G	G	G	G	G	G	G	G	G	G	G	G	G	G	G	G	G	G	G	G	G	G	G	G	G	G
Bn-A01-p4173668	A/G/-	A01	3853180	+	NA	NA	NA	NA	NA	NA	G	G	A	A	A	A	A	A	A	A	A	A	A	G	A	A	A	A	A	A	A	A	A	A	G	G	G	A	G	G	A	A	A	G	A	G	G	A	A
Bn-A01-p4177941	T/C/-	A01	3857501	+	NA	NA	NA	NA	NA	NA	C	C	C	C	C	T	C	C	C	C	T	C	T	C	C	C	C	C	C	C	C	C	C	C	C	C	C	C	C	C	C	T	C	C	C	C	C	C	C
Bn-scaff_19193_1-p618891	T/C/-	A01	3863493	+	NA	NA	NA	NA	NA	NA	T	T	T	T	T	C	T	T	T	T	C	T	C	T	T	T	T	T	T	T	T	T	T	T	T	T	T	T	T	T	T	C	T	T	T	T	T	T	T
Bn-A01-p4188629	T/C/-	A01	3870162	+	NA	NA	NA	NA	NA	NA	T	T	C	C	T	T	C	C	C	C	T	T	T	T	T	C	C	T	T	C	C	C	T	Y	T	T	T	T	T	T	C	T	C	T	C	T	T	C	C
Bn-scaff_19193_1-p567239	A/G/-	A01	3894128	+	NA	NA	NA	NA	NA	NA	G	G	A	G	A	A	G	G	G	A	G	A	G	G	A	G	R	A	A	A	A	A	A	A	G	G	G	A	G	G	A	R	A	G	A	G	G	A	A
Bn-A01-p4227703	A/G/-	A01	3904559	+	NA	NA	NA	NA	NA	NA	A	A	G	G	G	G	G	G	G	G	G	G	G	A	G	G	G	G	G	G	G	G	G	G	A	A	A	G	A	A	G	G	G	A	G	A	A	G	G
Bn-A01-p4233306	T/C/-	A01	3911409	+	NA	NA	NA	NA	NA	NA	T	T	C	T	C	C	T	T	T	C	C	C	C	T	C	T	Y	C	C	T	C	C	C	C	T	T	T	C	T	T	C	C	C	T	C	T	T	C	C
Bn-A01-p4235273	A/G/-	A01	3914964	+	NA	NA	NA	NA	NA	NA	G	G	A	G	A	A	G	G	G	A	A	A	A	G	A	G	R	A	A	G	A	A	A	A	G	G	G	A	G	G	A	A	A	G	A	G	G	A	A
Bn-A01-p4242269	A/C/-	A01	3921895	+	NA	NA	NA	NA	NA	NA	C	C	A	C	A	C	C	C	C	A	A	A	A	C	A	C	M	A	A	C	A	A	A	A	C	C	C	A	C	C	A	A	A	C	A	C	C	A	A
Bn-A01-p4246586	T/C/-	A01	3927770	+	NA	NA	NA	NA	NA	NA	C	C	C	C	T	T	C	C	Y	C	T	T	-	C	T	T	C	T	T	C	C	C	T	Y	C	C	C	T	C	C	C	Y	C	C	C	C	C	T	T
Bn-A01-p4258195	T/G/-	A01	3935696	+	NA	NA	NA	NA	NA	NA	T	T	G	-	K	T	T	T	T	G	T	K	T	T	T	T	-	K	T	T	G	G	T	K	T	T	T	K	T	T	G	-	G	T	G	T	T	K	T
Bn-A01-p4284958	A/C/-	A01	3956260	+	NA	NA	NA	NA	NA	NA	A	A	A	A	A	A	A	A	A	A	M	A	C	A	A	A	A	A	A	A	A	A	A	A	A	A	A	C	A	A	A	C	A	A	A	A	A	A	C
Bn-A01-p4293878	A/G/-	A01	3966929	+	NA	NA	NA	NA	NA	NA	A	A	A	A	A	A	A	A	A	A	G	A	G	A	A	A	A	A	A	A	A	A	A	A	A	A	A	R	A	A	A	G	A	A	A	A	A	A	G
Bn-A01-p4303527	A/C/-	A01	3984266	+	NA	NA	NA	NA	NA	NA	C	C	A	C	A	A	C	C	M	A	A	A	A	C	A	A	M	A	A	C	A	A	A	A	C	C	C	A	C	C	A	A	C	C	A	C	C	A	A
Bn-A01-p4335144	A/G/-	A01	4020809	+	NA	NA	NA	NA	NA	NA	G	G	A	G	G	A	G	G	R	A	A	A	A	G	A	A	A	G	G	G	A	A	A	R	G	G	G	A	G	G	A	A	G	G	A	G	G	A	A
Bn-A01-p4353657	T/C/-	A01	4039381	+	NA	NA	NA	NA	NA	NA	C	C	T	C	T	T	C	C	Y	T	C	T	C	C	T	T	Y	T	T	C	T	T	T	T	C	C	C	T	C	C	T	C	C	C	T	C	C	T	C
Bn-A01-p4354753	A/G/-	A01	4040460	+	NA	NA	NA	NA	NA	NA	A	A	G	G	G	G	A	G	G	G	G	A	G	A	G	G	G	G	G	A	G	G	G	G	A	A	A	R	A	A	G	G	A	A	G	A	A	G	G
Bn-scaff_19193_1-p313981	A/G/-	A01	4053797	+	NA	NA	NA	NA	NA	NA	G	G	G	G	G	G	G	G	G	G	A	G	A	G	G	G	G	A	A	G	G	G	A	G	G	G	G	A	G	G	G	A	A	G	G	G	G	G	A
Bn-A01-p26064479	A/G/-	A01	4075176	+	NA	NA	NA	NA	NA	NA	G	G	A	G	G	G	G	A	R	G	A	G	A	G	A	G	A	G	G	G	A	A	G	R	G	G	G	G	G	G	G	A	G	G	A	G	G	A	A
Bn-A01-p4452779	T/C/-	A01	4076835	+	NA	NA	NA	NA	NA	NA	T	T	C	T	T	T	T	C	Y	T	T	T	T	T	C	T	C	T	T	T	C	C	-	Y	T	T	T	T	T	T	T	T	T	T	C	T	T	C	T
Bn-A01-p4506540	A/G/-	A01	4125332	+	NA	NA	NA	NA	NA	NA	G	G	A	G	G	G	G	A	R	G	A	G	A	G	G	G	A	G	G	G	A	A	G	R	G	G	G	G	G	G	G	A	G	G	G	G	G	A	A
Bn-A01-p4549564	A/G/-	A01	4179812	+	NA	NA	NA	NA	NA	NA	G	G	A	G	G	G	G	G	G	G	A	G	A	G	G	G	G	G	G	G	A	G	G	G	G	G	G	A	G	G	G	A	G	G	G	G	G	G	A
Bn-A01-p4600975	A/C/-	A01	4227188	+	NA	NA	NA	NA	NA	NA	A	A	A	A	A	A	A	A	A	A	A	A	A	A	A	A	M	A	A	A	C	C	A	-	A	A	A	C	A	A	A	A	A	A	A	A	A	C	C
Bn-A01-p4612881	A/G/-	A01	4235714	+	NA	NA	NA	NA	NA	NA	G	G	G	G	G	G	G	G	G	G	G	G	G	G	G	G	R	G	G	G	A	A	G	R	G	G	G	A	G	G	G	G	G	G	G	G	G	A	A
Bn-A01-p4635210	T/C/-	A01	4254871	+	NA	NA	NA	NA	NA	NA	C	C	C	T	C	T	T	T	T	T	C	C	T	C	T	C	T	T	C	C	T	T	T	T	C	C	C	T	C	C	T	-	C	C	C	C	C	T	T
Bn-A01-p4641747	A/C/-	A01	4261277	+	NA	NA	NA	NA	NA	NA	A	A	A	A	A	A	A	A	A	A	A	A	A	A	A	A	A	A	A	A	A	A	A	A	A	A	A	A	A	A	A	A	A	A	A	A	A	A	A
Bn-A01-p4651746	A/G/-	A01	4273529	+	NA	NA	NA	NA	NA	NA	G	G	G	G	G	G	G	G	G	G	G	G	G	G	G	G	G	G	G	G	G	G	G	G	G	G	G	G	G	G	G	G	G	G	G	G	G	G	G
Bn-A01-p4659972	A/G/-	A01	4279894	+	NA	NA	NA	NA	NA	NA	A	A	A	A	A	A	A	A	A	A	G	A	G	A	A	A	A	A	G	G	G	A	A	A	A	A	A	G	A	A	A	G	G	A	A	A	A	A	A
Bn-scaff_17731_1-p155870	T/C/-	A01	4340888	+	NA	NA	NA	NA	NA	NA	T	T	T	T	T	T	T	T	T	C	T	T	T	T	T	T	T	T	T	T	T	T	T	T	T	T	T	T	T	T	C	T	T	T	T	T	T	T	C
Bn-scaff_17731_1-p165802	T/C/-	A01	4345767	+	NA	NA	NA	NA	NA	NA	T	T	T	T	C	T	T	T	T	C	T	T	C	T	T	T	T	T	T	T	T	C	T	C	T	T	T	C	T	T	T	T	T	T	T	T	T	T	T
Bn-A01-p4747874	T/C/-	A01	4350529	+	NA	NA	NA	NA	NA	NA	C	C	C	C	T	T	C	C	C	T	T	C	T	C	C	C	Y	T	T	T	C	T	T	T	C	C	C	T	C	C	T	T	T	C	C	C	C	T	T
Bn-A01-p4750734	T/C/-	A01	4353390	+	NA	NA	NA	NA	NA	NA	T	T	T	T	C	C	T	T	T	C	C	T	C	T	T	T	Y	C	C	C	T	C	C	C	T	T	T	C	T	T	C	C	C	T	T	T	T	C	C
Bn-A01-p4774065	A/G/-	A01	4380227	+	NA	NA	NA	NA	NA	NA	A	A	A	A	G	G	A	A	A	G	G	A	G	A	A	A	R	G	G	G	A	G	G	G	A	A	A	G	A	A	G	G	G	A	A	A	A	G	G
Bn-A01-p4785261	T/G/-	A01	4397190	+	NA	NA	NA	NA	NA	NA	T	T	G	G	T	G	T	T	K	T	G	T	G	T	G	G	T	G	T	T	T	T	T	T	T	T	T	G	G	T	T	G	T	T	T	T	T	T	T
Bn-A01-p4786787	T/G/-	A01	4398725	+	NA	NA	NA	NA	NA	NA	T	T	T	G	T	G	T	T	K	T	G	T	G	T	G	G	T	G	T	T	T	T	T	T	T	T	T	G	G	T	T	G	T	T	T	T	T	T	T
Bn-A01-p4787515	A/G/-	A01	4399498	+	NA	NA	NA	NA	NA	NA	G	G	G	A	G	A	G	G	R	G	A	G	A	G	A	A	G	A	G	G	G	G	G	G	G	G	G	A	A	G	G	A	G	G	G	G	G	G	G
Bn-A01-p4799050	T/C/-	A01	4410586	+	NA	NA	NA	NA	NA	NA	C	C	C	T	C	T	C	C	Y	C	T	C	T	C	T	T	C	T	C	C	C	C	C	C	C	C	C	T	T	C	C	T	C	C	C	C	C	C	C
Bn-A01-p4808404	A/C/-	A01	4417669	+	NA	NA	NA	NA	NA	NA	A	A	C	A	A	A	C	A	A	C	A	A	A	A	A	A	A	A	A	A	A	A	A	A	A	A	A	A	A	A	C	A	A	A	A	A	A	A	C
Bn-A01-p4812269	A/G/-	A01	4421491	+	NA	NA	NA	NA	NA	NA	A	A	G	A	A	A	G	A	A	G	A	A	A	A	A	A	A	A	A	A	A	A	A	A	A	A	A	A	A	A	G	A	A	A	A	A	A	A	G
Bn-A01-p4840973	T/C/-	A01	4442904	+	NA	NA	NA	NA	NA	NA	T	T	C	C	C	C	C	T	Y	C	C	T	C	T	C	C	T	C	T	T	T	C	C	C	T	T	T	C	C	T	C	C	T	T	T	T	T	T	C
Bn-A01-p4874972	T/C/-	A01	4474056	+	NA	NA	NA	NA	NA	NA	C	C	C	C	T	T	C	C	C	T	C	C	T	C	T	C	C	T	T	C	C	T	T	T	C	C	C	T	C	C	T	T	T	C	C	C	C	T	T
Bn-A01-p4908924	A/C/-	A01	4512396	+	NA	NA	NA	NA	NA	NA	A	A	A	A	C	A	A	A	A	C	A	A	A	A	C	A	A	C	A	A	A	C	C	C	A	A	A	A	A	A	C	A	A	A	A	A	A	A	C
Bn-A01-p4909065	T/C/-	A01	4512538	+	NA	NA	NA	NA	NA	NA	C	C	C	C	T	C	C	C	C	T	C	C	C	C	T	C	C	T	C	C	C	T	T	T	C	C	C	C	C	C	T	C	C	C	C	C	C	C	T
Bn-A01-p4920622	A/G/-	A01	4515874	+	NA	NA	NA	NA	NA	NA	A	A	A	A	G	A	A	A	A	G	A	A	A	A	G	A	A	G	A	A	A	G	G	G	A	A	A	A	A	A	G	A	A	A	A	A	A	A	G
Bn-A01-p4922557	A/C/-	A01	4517704	+	NA	NA	NA	NA	NA	NA	A	A	C	C	A	C	C	A	M	C	C	A	C	A	C	C	A	C	C	C	A	A	A	A	A	A	A	A	C	A	C	C	C	A	A	A	A	C	C
Bn-A01-p4925004	A/G/-	A01	4520168	+	NA	NA	NA	NA	NA	NA	G	G	G	G	G	G	G	G	G	A	G	G	G	G	A	G	G	A	G	G	G	G	G	G	G	G	G	G	G	G	A	G	G	G	G	G	G	-	A
Bn-A01-p4947577	T/G/-	A01	4549207	+	NA	NA	NA	NA	NA	NA	T	T	T	G	T	G	G	T	K	G	T	T	G	T	G	G	T	G	G	G	T	T	T	T	T	T	T	T	G	T	G	G	G	T	T	T	T	G	G
Bn-A01-p4963297	A/G/-	A01	4566478	+	NA	NA	NA	NA	NA	NA	A	A	A	A	A	A	G	A	A	A	A	A	G	A	A	A	A	G	G	G	A	A	A	A	A	A	A	A	A	A	A	G	G	A	A	A	A	G	A
Bn-A01-p5017446	T/C/-	A01	4611547	+	NA	NA	NA	NA	NA	NA	T	T	C	T	T	T	T	T	T	C	C	T	T	T	C	T	-	T	T	T	T	T	T	T	T	T	T	C	T	T	C	T	T	T	C	T	T	T	C
Bn-A01-p5020890	T/C/-	A01	4615003	+	NA	NA	NA	NA	NA	NA	T	T	C	T	T	T	T	T	T	C	C	T	T	T	C	T	-	T	T	T	T	T	T	T	T	T	T	T	T	T	C	T	T	T	T	T	T	T	C
Bn-A01-p5070565	T/C/-	A01	4655885	+	NA	NA	NA	NA	NA	NA	C	C	T	C	C	C	C	C	C	T	T	C	C	C	T	C	-	C	C	T	C	C	C	C	C	C	C	C	C	C	T	-	C	C	C	C	C	C	T
Bn-A01-p5070836	T/C/-	A01	4656155	+	NA	NA	NA	NA	NA	NA	T	T	C	T	T	T	T	T	T	C	C	T	T	T	C	T	-	T	T	C	T	T	T	T	T	T	T	T	T	T	C	T	T	T	T	T	T	T	C
Bn-A01-p5101078	T/C/-	A01	4678834	+	NA	NA	NA	NA	NA	NA	T	T	C	T	T	T	T	T	T	C	C	T	T	T	C	T	-	T	C	T	T	T	T	T	T	T	T	C	T	T	C	T	T	T	C	T	T	T	C
Bn-A01-p5106042	A/G/-	A01	4683804	+	NA	NA	NA	NA	NA	NA	G	G	-	G	G	G	G	R	R	G	A	A	G	G	A	G	A	G	A	G	G	G	G	G	G	G	G	G	G	G	G	G	G	G	A	G	G	G	G
Bn-A01-p5238564	A/G/-	A01	4821807	+	NA	NA	NA	NA	NA	NA	G	G	G	G	G	G	G	G	G	G	G	G	A	G	G	G	R	G	G	G	G	G	G	G	G	G	G	G	G	G	G	R	G	G	G	G	G	G	G
Bn-A01-p5242967	T/C/-	A01	4826211	+	NA	NA	NA	NA	NA	NA	T	T	C	T	T	T	T	T	T	T	C	T	T	T	T	T	T	T	T	T	T	T	T	T	T	T	T	T	T	T	T	T	T	T	T	T	T	T	T
Bn-A01-p5243029	A/G/-	A01	4826273	+	NA	NA	NA	NA	NA	NA	A	A	G	A	A	A	A	A	A	A	G	A	A	A	A	A	A	A	A	A	A	A	A	A	A	A	A	A	A	A	A	A	A	A	A	A	A	A	A
Bn-A01-p5243036	A/G/-	A01	4826280	+	NA	NA	NA	NA	NA	NA	G	G	A	G	G	G	-	G	G	G	A	G	G	G	G	G	G	G	G	G	-	G	G	G	G	G	G	G	G	G	G	G	G	G	G	G	R	R	G
Bn-A01-p5243181	A/G/-	A01	4826425	+	NA	NA	NA	NA	NA	NA	G	G	A	G	G	G	G	G	G	G	A	G	G	G	G	G	G	G	G	G	G	G	G	G	G	G	G	G	G	G	G	G	G	G	G	G	G	G	G
Bn-A01-p5265598	T/C/-	A01	4856648	+	NA	NA	NA	NA	NA	NA	T	T	C	T	T	T	T	T	T	T	C	T	T	T	T	T	T	T	T	T	T	T	T	T	T	T	T	T	T	T	T	C	T	T	T	T	T	T	T
Bn-A01-p5296564	A/G/-	A01	4890976	+	NA	NA	NA	NA	NA	NA	G	G	G	G	A	G	G	G	G	A	A	G	G	A	G	G	R	A	A	G	A	A	A	A	G	G	G	A	G	A	A	G	A	A	A	G	G	A	A
Bn-A01-p5318059	T/G/-	A01	4907007	+	NA	NA	NA	NA	NA	NA	G	G	G	G	G	G	T	G	G	G	G	G	T	G	G	G	G	G	G	G	G	G	G	G	G	G	G	G	G	G	G	G	G	G	G	G	G	G	G
Bn-A01-p5323726	T/C/-	A01	4912681	+	NA	NA	NA	NA	NA	NA	C	C	C	C	C	C	T	C	C	C	C	C	T	C	C	C	C	C	C	C	C	C	C	C	C	C	C	C	C	C	C	C	C	C	C	C	C	C	C
Bn-A01-p5391551	A/G/-	A01	4963244	+	NA	NA	NA	NA	NA	NA	A	A	A	A	A	A	G	A	A	A	A	A	G	A	A	A	A	G	G	A	A	A	A	A	A	A	A	G	A	A	A	G	G	A	G	A	A	G	G
Bn-A01-p5469727	T/C/-	A01	5034468	+	NA	NA	NA	NA	NA	NA	C	C	C	C	T	T	C	C	Y	C	T	C	C	T	T	T	C	C	T	T	T	T	T	T	C	C	C	C	T	T	C	C	T	T	C	C	C	C	C
Bn-A01-p5480514	A/G/-	A01	5042606	+	NA	NA	NA	NA	NA	NA	G	G	G	G	A	G	A	G	G	G	G	G	A	A	A	G	G	A	A	A	A	A	A	A	G	G	G	G	G	A	G	A	A	A	G	G	G	G	A
Bn-A01-p5480517	T/C/-	A01	5042609	+	NA	NA	NA	NA	NA	NA	C	C	C	C	T	C	T	C	C	C	C	C	T	T	T	C	C	T	T	T	T	T	T	T	C	C	C	C	C	T	C	T	T	T	C	C	C	C	T
Bn-A01-p5481004	A/C/-	A01	5043095	+	NA	NA	NA	NA	NA	NA	A	A	A	A	C	A	C	A	A	A	C	A	C	C	C	A	A	C	C	C	C	C	C	C	A	A	A	A	A	C	A	C	C	C	A	A	A	A	C
Bn-scaff_17827_1-p329960	T/C/-	A01	5076774	+	NA	NA	NA	NA	NA	NA	C	C	C	C	C	C	C	C	C	C	T	C	C	C	C	C	C	C	C	C	C	C	C	C	C	C	C	C	C	C	C	C	C	C	C	C	C	C	C
Bn-A01-p5522403	T/C/-	A01	5082080	+	NA	NA	NA	NA	NA	NA	T	T	T	T	T	C	T	T	Y	T	C	T	C	T	T	C	Y	T	T	T	T	T	T	T	T	T	T	T	Y	T	T	T	T	T	C	T	T	C	T
Bn-A01-p5621392	T/C/-	A01	5140924	+	NA	NA	NA	NA	NA	NA	C	C	C	T	C	C	T	T	Y	C	C	T	C	C	C	C	Y	C	T	C	C	C	C	C	C	C	C	T	C	C	C	T	C	C	C	C	C	C	T
Bn-A01-p5647795	T/C/-	A01	5154600	+	NA	NA	NA	NA	NA	NA	C	C	C	C	C	C	C	C	C	C	T	C	C	C	C	C	C	C	C	C	C	C	C	C	C	C	C	C	C	C	C	C	C	C	C	C	C	C	C
Bn-A01-p5648120	T/G/-	A01	5154925	+	NA	NA	NA	NA	NA	NA	G	G	G	G	G	G	G	G	G	G	T	G	G	G	G	G	G	G	G	G	G	G	G	G	G	G	G	G	G	G	G	G	G	G	G	G	G	G	G
Bn-A01-p5658004	T/C/-	A01	5165863	+	NA	NA	NA	NA	NA	NA	C	C	C	C	C	C	C	C	C	C	T	C	C	C	C	C	C	C	C	C	C	C	C	C	C	C	C	C	C	C	C	C	C	C	C	C	C	C	C
Bn-A01-p5661294	T/G/-	A01	5169173	+	NA	NA	NA	NA	NA	NA	G	G	G	T	G	T	T	T	T	T	G	T	T	G	G	G	T	G	T	G	G	G	G	G	G	G	G	T	K	G	T	T	G	G	T	G	G	T	T
Bn-scaff_17827_1-p600033	A/C/-	A01	5174278	+	NA	NA	NA	NA	NA	NA	C	C	C	A	A	A	A	A	A	C	M	A	C	C	A	C	A	A	C	A	A	A	C	A	C	C	C	A	C	C	A	M	C	C	A	C	C	A	C
Bn-A01-p5678678	A/C/-	A01	5185883	+	NA	NA	NA	NA	NA	NA	A	A	A	C	A	A	C	C	M	C	A	C	C	A	A	A	C	A	C	A	A	A	A	A	A	A	A	C	A	A	C	C	A	A	C	A	A	C	C
Bn-A01-p5697706	T/C/-	A01	5201709	+	NA	NA	NA	NA	NA	NA	T	T	T	C	C	T	C	C	Y	C	T	C	C	C	T	T	C	T	C	C	C	C	C	C	T	T	T	T	T	C	C	T	C	C	C	T	T	C	C
Bn-A01-p5711920	A/G/-	A01	5214185	+	NA	NA	NA	NA	NA	NA	A	A	A	G	G	G	G	G	G	G	A	G	G	G	A	A	G	A	G	G	G	G	G	G	A	A	A	A	R	G	G	A	G	G	G	A	A	G	G
Bn-A01-p5715141	A/G/-	A01	5217408	+	NA	NA	NA	NA	NA	NA	G	G	G	A	G	G	A	A	R	A	G	A	A	G	G	G	A	G	A	A	A	G	G	G	G	G	G	G	G	G	A	G	G	G	A	G	G	A	A
Bn-A01-p5808036	T/C/-	A01	5287347	+	NA	NA	NA	NA	NA	NA	C	C	C	T	T	C	T	T	Y	T	T	T	T	T	Y	C	T	C	T	T	T	T	T	T	C	C	C	T	C	T	T	T	T	T	T	C	C	T	T
Bn-A01-p5821651	A/C/-	A01	5301143	+	NA	NA	NA	NA	NA	NA	C	C	C	C	C	C	C	C	C	C	C	C	C	C	M	C	C	C	C	C	C	C	C	C	C	C	C	C	C	C	C	C	C	C	C	C	C	C	C
Bn-A01-p5822015	T/C/-	A01	5301507	+	NA	NA	NA	NA	NA	NA	T	T	T	T	T	C	C	C	C	C	C	C	C	T	T	T	C	T	C	C	C	T	T	T	T	T	T	T	Y	T	C	C	T	T	C	T	T	C	C
Bn-A01-p5862558	A/C/-	A01	5346699	+	NA	NA	NA	NA	NA	NA	A	A	A	C	A	C	C	A	M	A	C	C	C	A	C	A	M	A	C	C	C	A	A	A	A	A	A	C	M	A	A	C	A	A	A	A	A	C	C
Bn-A01-p5868598	T/G/-	A01	5351811	+	NA	NA	NA	NA	NA	NA	T	T	T	T	T	T	T	T	T	T	T	T	T	T	K	T	T	T	T	T	T	T	T	T	T	T	T	T	T	T	T	T	T	T	T	T	T	T	T
Bn-A01-p5873504	A/C/-	A01	5356717	+	NA	NA	NA	NA	NA	NA	C	C	C	C	C	C	C	C	C	C	C	C	C	C	M	C	C	C	C	C	C	C	C	C	C	C	C	C	C	C	C	C	C	C	C	C	C	C	C
Bn-A01-p5899092	T/C/-	A01	5394095	+	NA	NA	NA	NA	NA	NA	C	C	Y	C	C	T	T	T	T	T	T	T	T	C	T	C	T	C	Y	T	T	C	Y	C	C	C	C	C	Y	C	T	C	C	C	C	C	C	T	C
Bn-A01-p5917688	T/C/-	A01	5405648	+	NA	NA	NA	NA	NA	NA	C	C	C	T	C	T	T	T	T	T	T	T	T	C	T	C	Y	C	T	T	T	C	C	C	C	C	C	T	Y	C	T	T	C	C	C	C	C	T	C
Bn-A01-p5943392	A/G/-	A01	5433317	+	NA	NA	NA	NA	NA	NA	A	A	A	A	A	G	A	A	A	A	A	A	A	A	A	A	A	A	G	G	A	A	A	A	A	A	A	A	A	A	A	G	A	A	A	A	A	A	A
Bn-A01-p5959700	A/G/-	A01	5443834	+	NA	NA	NA	NA	NA	NA	A	A	A	A	A	A	A	A	A	A	A	A	A	A	A	A	A	A	A	A	A	A	A	A	A	A	A	A	A	A	A	A	A	A	A	A	A	A	A
Bn-A01-p5977820	A/G/-	A01	5463912	+	NA	NA	NA	NA	NA	NA	G	G	G	G	G	G	G	G	G	G	G	G	G	G	G	G	G	G	G	G	G	G	G	G	G	G	G	G	G	G	G	A	G	G	G	G	G	G	G
Bn-A01-p5994980	T/C/-	A01	5478000	+	NA	NA	NA	NA	NA	NA	C	C	C	C	C	C	C	C	C	C	C	C	C	C	C	C	C	C	T	T	C	C	C	C	C	C	C	C	C	C	C	C	C	C	C	C	C	C	C
Bn-A01-p6035491	A/C/-	A01	5519429	+	NA	NA	NA	NA	NA	NA	A	A	A	A	A	A	A	A	A	A	A	A	A	A	A	A	A	A	A	A	A	A	A	A	A	A	A	A	A	A	A	A	A	A	A	A	A	A	A
Bn-A01-p6044475	A/G/-	A01	5528375	+	NA	NA	NA	NA	NA	NA	G	G	G	A	A	G	G	G	G	G	G	G	G	A	G	G	G	G	A	A	G	A	A	A	G	G	G	G	G	A	G	A	A	A	G	G	G	A	A
Bn-A01-p6081978	A/G/-	A01	5560856	+	NA	NA	NA	NA	NA	NA	G	G	G	A	A	G	G	G	G	G	G	G	G	A	G	G	G	G	A	A	G	A	A	A	G	G	G	G	G	A	G	A	A	A	G	G	G	A	A
Bn-A01-p6168163	T/C/-	A01	5651413	+	NA	NA	NA	NA	NA	NA	C	C	C	C	C	C	C	C	C	C	C	C	C	C	Y	C	C	C	T	T	C	C	C	C	C	C	C	C	C	C	C	C	C	C	C	C	C	C	C
Bn-A01-p6180257	A/C/-	A01	5663657	+	NA	NA	NA	NA	NA	NA	A	A	A	C	C	C	C	C	C	C	C	C	C	C	M	A	M	A	A	A	A	C	C	C	A	A	A	C	A	C	C	C	C	C	C	A	A	C	C
Bn-A01-p6182710	T/G/-	A01	5665964	+	NA	NA	NA	NA	NA	NA	T	T	T	G	G	G	G	G	G	G	G	G	G	G	K	T	K	T	G	G	T	G	G	G	T	T	T	G	T	G	G	G	G	G	G	T	T	G	G
Bn-A01-p6188347	T/C/-	A01	5671593	+	NA	NA	NA	NA	NA	NA	T	T	T	T	T	T	T	T	T	T	T	C	T	T	T	T	T	T	C	C	T	T	T	T	T	T	T	T	T	T	T	T	T	T	T	T	T	T	T
Bn-A01-p6220667	A/G/-	A01	5702355	+	NA	NA	NA	NA	NA	NA	A	A	A	A	A	G	A	G	G	G	A	G	A	A	R	A	-	A	G	G	A	A	A	A	A	A	A	G	A	A	G	G	A	A	A	A	A	A	A
Bn-A01-p6232061	T/C/-	A01	5714482	+	NA	NA	NA	NA	NA	NA	T	T	T	C	C	T	C	T	T	T	C	T	C	C	T	T	T	T	T	T	T	C	C	C	T	T	T	T	T	C	T	T	C	C	C	T	T	T	T
Bn-A01-p6274135	A/G/-	A01	5742717	+	NA	NA	NA	NA	NA	NA	A	A	A	G	G	A	G	A	A	A	G	A	G	G	R	A	R	A	A	A	G	G	G	G	A	A	A	A	A	G	A	A	G	G	G	A	A	G	G
Bn-A01-p6333910	T/C/-	A01	5789920	+	NA	NA	NA	NA	NA	NA	C	C	C	T	T	T	T	T	T	T	T	C	T	T	T	C	T	C	C	C	T	T	T	T	C	C	C	T	C	T	T	T	T	T	T	C	C	T	T
Bn-scaff_16128_1-p499556	A/G/-	A01	5834347	+	NA	NA	NA	NA	NA	NA	A	A	A	A	A	A	A	A	A	A	A	A	A	A	R	A	A	A	A	A	A	A	A	A	A	A	A	G	A	A	A	G	A	A	A	A	A	A	A
Bn-A01-p6380934	A/C/-	A01	5841882	+	NA	NA	NA	NA	NA	NA	C	C	C	C	C	-	C	A	A	A	C	-	C	C	-	C	C	A	C	C	C	C	C	C	C	C	C	C	C	C	A	-	C	C	C	C	C	-	C
Bn-A01-p6478922	A/G/-	A01	5956270	+	NA	NA	NA	NA	NA	NA	G	G	G	G	G	G	G	G	G	G	G	A	G	G	R	G	G	A	G	G	G	G	G	G	G	G	G	A	G	G	G	A	G	G	G	G	G	G	G
Bn-A01-p6482543	A/C/-	A01	5959061	+	NA	NA	NA	NA	NA	NA	C	C	C	C	C	C	C	C	C	C	C	A	C	C	M	C	C	A	C	C	C	C	C	C	C	C	C	A	C	C	C	A	C	C	C	C	C	C	C
Bn-A01-p6546245	A/G/-	A01	6010206	+	NA	NA	NA	NA	NA	NA	A	A	A	A	A	A	A	G	R	G	A	A	A	A	R	A	-	A	G	A	A	A	A	A	A	A	A	A	A	A	G	A	A	A	A	A	A	A	A
Bn-A01-p6547052	A/C/-	A01	6011013	+	NA	NA	NA	NA	NA	NA	C	C	A	A	C	A	A	C	M	C	A	A	A	C	M	C	M	A	A	C	A	C	C	C	C	C	C	A	C	C	C	A	C	C	A	C	C	A	A
Bn-A01-p6560270	T/C/-	A01	6024571	+	NA	NA	NA	NA	NA	NA	T	T	C	C	T	T	C	C	Y	C	C	C	C	T	Y	T	C	T	T	T	C	T	T	T	T	T	T	T	T	T	C	T	T	T	C	T	T	C	C
Bn-A01-p6604419	A/G/-	A01	6051921	+	NA	NA	NA	NA	NA	NA	A	A	A	A	A	G	A	G	G	G	A	A	A	A	R	A	R	G	G	G	A	A	A	A	A	A	A	A	A	A	G	G	A	A	A	A	A	G	A
Bn-A01-p6625349	T/C/-	A01	6073160	+	NA	NA	NA	NA	NA	NA	C	C	C	C	C	C	C	T	Y	T	C	C	C	C	T	C	Y	T	T	C	C	C	C	C	C	C	C	Y	C	C	T	T	C	C	C	C	C	T	C
Bn-A01-p6628035	T/C/-	A01	6080336	+	NA	NA	NA	NA	NA	NA	T	T	T	T	T	C	T	C	C	C	T	T	T	T	Y	T	Y	C	T	T	T	T	T	T	T	T	T	T	T	T	C	C	T	T	T	T	T	T	T
Bn-A01-p6643749	A/C/-	A01	6096242	+	NA	NA	NA	NA	NA	NA	A	A	A	A	A	A	A	A	A	A	A	A	A	A	A	A	A	A	A	A	A	A	A	A	A	A	A	C	A	A	A	A	A	A	A	A	A	C	A
Bn-A01-p6664608	T/G/-	A01	6115949	+	NA	NA	NA	NA	NA	NA	G	G	G	G	G	G	G	G	G	G	G	G	G	G	G	G	G	G	G	G	T	G	G	G	G	G	G	T	G	G	G	G	G	G	G	G	G	T	G
Bn-A01-p6678914	T/C/-	A01	6119402	+	NA	NA	NA	NA	NA	NA	C	C	C	C	C	C	C	C	C	C	C	C	C	C	C	C	C	C	C	C	T	C	C	C	C	C	C	T	C	C	C	T	C	C	C	C	C	T	T
Bn-A01-p6679394	A/G/-	A01	6119883	+	NA	NA	NA	NA	NA	NA	A	A	A	A	A	A	A	A	A	A	A	A	A	A	A	A	A	A	A	A	A	A	A	A	A	A	A	G	A	A	A	G	A	A	A	A	A	G	G
Bn-scaff_20638_1-p142399	A/G/-	A01	6122869	+	NA	NA	NA	NA	NA	NA	G	G	G	G	G	G	G	G	G	G	G	G	G	G	G	G	G	G	G	G	G	G	G	G	G	G	G	G	G	G	G	G	G	G	G	G	G	G	G
Bn-A01-p6687707	T/C/-	A01	6129231	+	NA	NA	NA	NA	NA	NA	T	T	T	T	T	T	T	T	T	T	T	T	T	T	T	T	T	T	T	T	C	T	T	T	T	T	T	C	T	T	T	C	T	T	T	T	T	C	C
Bn-A01-p6687839	A/C/-	A01	6129363	+	NA	NA	NA	NA	NA	NA	A	A	A	A	A	A	A	A	A	A	A	A	A	A	A	A	A	A	A	A	C	A	A	A	A	A	A	A	A	A	A	C	A	A	A	A	A	A	C
Bn-A01-p6699539	A/C/-	A01	6139862	+	NA	NA	NA	NA	NA	NA	C	C	C	C	C	C	C	C	C	C	C	C	C	C	C	C	C	C	C	C	C	C	C	C	C	C	C	C	C	C	C	C	C	C	C	C	C	C	C
Bn-A01-p6708539	A/G/-	A01	6149644	+	NA	NA	NA	NA	NA	NA	A	A	A	A	A	A	A	A	A	A	A	G	A	A	A	A	A	A	A	A	A	A	A	A	A	A	A	G	A	A	A	A	A	A	A	A	A	G	A
Bn-A01-p6713213	A/G/-	A01	6154320	+	NA	NA	NA	NA	NA	NA	G	G	A	A	G	G	A	G	G	G	A	G	A	G	G	G	G	G	A	G	A	G	G	G	G	G	G	G	G	G	G	A	G	G	G	G	G	G	A
Bn-A01-p6714740	A/G/-	A01	6155847	+	NA	NA	NA	NA	NA	NA	A	A	G	G	A	A	G	A	A	A	G	A	G	A	A	A	A	A	G	A	G	A	A	A	A	A	A	A	A	A	A	A	A	A	A	A	A	A	A
Bn-A01-p6715317	A/G/-	A01	6156424	+	NA	NA	NA	NA	NA	NA	G	G	A	A	G	G	A	G	G	G	A	G	A	G	G	G	G	G	A	G	A	G	G	G	G	G	G	G	G	G	G	A	G	G	G	G	G	G	A
Bn-A01-p6747706	T/G/-	A01	6173561	+	NA	NA	NA	NA	NA	NA	T	T	G	G	T	T	G	T	T	T	G	G	G	T	T	T	T	T	G	T	G	T	T	T	T	T	T	G	T	T	T	T	T	T	T	T	T	T	T
Bn-A01-p6776634	A/G/-	A01	6196049	+	NA	NA	NA	NA	NA	NA	G	G	A	A	G	G	A	G	G	R	A	A	A	G	G	G	G	G	A	G	A	G	G	G	G	G	G	G	G	G	G	A	G	G	G	G	G	G	A
Bn-A01-p6825673	A/G/-	A01	6237991	+	NA	NA	NA	NA	NA	NA	G	G	A	A	G	G	A	G	G	G	A	A	A	G	R	G	G	G	A	G	A	G	G	G	G	G	G	R	G	G	G	A	G	G	G	G	G	G	A
Bn-A01-p6854917	A/C/-	A01	6267309	+	NA	NA	NA	NA	NA	NA	C	C	A	A	C	C	A	C	C	C	A	A	A	C	C	C	C	C	A	C	A	C	C	C	C	C	C	M	C	C	C	C	C	C	C	C	C	C	C
Bn-A01-p6863835	T/G/-	A01	6282214	+	NA	NA	NA	NA	NA	NA	G	G	T	T	G	G	T	G	G	G	T	T	T	G	G	G	G	G	T	G	T	G	G	G	G	G	G	K	G	G	G	G	G	G	G	G	G	G	G
Bn-A01-p6898291	A/G/-	A01	6314129	+	NA	NA	NA	NA	NA	NA	G	G	G	A	G	G	A	A	R	A	A	A	A	G	G	G	G	G	A	G	A	G	G	G	G	G	G	G	G	G	A	G	G	G	G	G	G	G	G
Bn-A01-p6898690	T/C/-	A01	6314539	+	NA	NA	NA	NA	NA	NA	T	T	T	C	T	T	T	C	Y	C	T	C	T	T	T	T	T	T	C	T	C	T	T	T	T	T	T	T	T	T	C	T	T	T	T	T	T	T	T
Bn-A01-p6968751	T/C/-	A01	6381711	+	NA	NA	NA	NA	NA	NA	C	C	C	C	C	C	T	T	Y	T	T	T	T	C	Y	C	Y	C	C	C	C	C	C	C	C	C	C	C	C	C	T	C	C	C	C	C	C	T	C
Bn-A01-p6969284	T/C/-	A01	6382244	+	NA	NA	NA	NA	NA	NA	C	C	C	C	C	C	T	T	Y	T	T	T	T	C	Y	C	Y	C	C	C	C	C	C	C	C	C	C	Y	C	C	T	T	C	C	C	C	C	T	T
Bn-A01-p6972779	T/C/-	A01	6393067	+	NA	NA	NA	NA	NA	NA	C	C	C	C	C	C	T	T	Y	T	T	T	T	C	Y	C	-	C	C	C	C	C	C	C	C	C	C	Y	C	C	T	T	C	C	C	C	C	T	T
Bn-A01-p6976938	A/C/-	A01	6397251	+	NA	NA	NA	NA	NA	NA	C	C	C	C	C	C	C	A	M	A	C	A	C	C	M	C	M	C	C	C	C	C	C	C	C	C	C	C	C	C	A	C	C	C	C	C	C	C	C
Bn-A01-p7026162	T/C/-	A01	6432028	+	NA	NA	NA	NA	NA	NA	T	T	T	T	T	T	C	C	Y	C	C	C	C	T	Y	T	-	T	C	T	C	T	T	T	T	T	T	C	T	T	C	T	T	T	T	T	T	C	T
Bn-A01-p7068752	T/G/-	A01	6472468	+	NA	NA	NA	NA	NA	NA	G	G	G	G	G	G	G	G	G	G	G	G	G	G	G	G	G	G	G	G	G	G	G	G	G	G	G	K	G	G	G	G	G	G	G	G	G	G	G
Bn-A01-p7087000	T/C/-	A01	6487619	+	NA	NA	NA	NA	NA	NA	C	C	C	C	C	C	T	C	C	C	T	C	T	C	C	C	Y	C	C	C	T	C	C	C	C	C	C	Y	C	C	C	C	C	C	T	C	C	C	C
Bn-A01-p7137897	A/G/-	A01	6517958	+	NA	NA	NA	NA	NA	NA	G	G	G	G	G	A	G	G	R	G	G	G	G	G	R	G	R	G	G	A	G	G	G	G	G	G	G	R	G	G	G	A	G	G	G	G	G	-	A
Bn-A01-p7363480	T/C/-	A01	6730564	+	NA	NA	NA	NA	NA	NA	T	T	T	C	T	T	C	C	Y	T	C	T	C	T	T	T	Y	T	T	T	C	T	T	T	T	T	T	C	T	T	T	T	T	T	T	T	T	T	T
Bn-A01-p7369125	T/C/-	A01	6736241	+	NA	NA	NA	NA	NA	NA	C	C	C	C	C	C	C	C	C	C	C	C	C	C	C	C	C	C	C	C	C	C	C	C	C	C	C	C	C	C	C	C	C	C	C	C	C	C	C
Bn-A01-p7373427	T/G/-	A01	6740602	+	NA	NA	NA	NA	NA	NA	G	G	G	T	G	T	G	G	K	G	G	G	G	G	K	G	K	G	G	G	G	G	G	G	G	G	G	G	G	G	G	T	G	G	T	G	G	T	T
Bn-A01-p7374589	T/C/-	A01	6741747	+	NA	NA	NA	NA	NA	NA	T	T	T	-	T	C	T	T	Y	T	T	T	T	T	Y	T	Y	T	T	T	T	T	T	T	T	T	T	T	T	T	T	C	T	T	C	T	T	C	C
Bn-A01-p7430242	A/G/-	A01	6794634	+	NA	NA	NA	NA	NA	NA	A	A	A	G	A	G	A	A	R	A	A	A	A	A	R	A	R	A	A	A	A	A	A	A	A	A	A	A	A	A	A	G	A	A	G	A	A	G	G
Bn-A01-p7430311	A/G/-	A01	6794703	+	NA	NA	NA	NA	NA	NA	G	G	G	A	G	A	G	G	R	G	G	G	G	G	R	G	R	G	G	G	G	G	G	G	G	G	G	G	G	G	G	A	G	G	A	G	G	A	A
Bn-A01-p7455852	T/G/-	A01	6812918	+	NA	NA	NA	NA	NA	NA	T	T	T	T	T	G	T	T	K	T	T	T	T	T	K	T	K	T	T	T	T	T	T	T	T	T	T	T	T	T	T	G	T	T	G	T	T	G	G
Bn-A01-p7533971	A/G/-	A01	6884170	+	NA	NA	NA	NA	NA	NA	A	A	A	G	A	G	G	A	R	A	G	A	G	A	R	A	A	A	G	A	A	A	A	A	A	A	A	R	A	A	A	G	A	A	A	A	A	G	G
Bn-A01-p7559946	T/C/-	A01	6900567	+	NA	NA	NA	NA	NA	NA	C	C	C	T	C	C	C	C	C	C	C	C	C	C	C	C	C	C	C	C	C	C	C	C	C	C	C	C	C	C	C	C	C	C	C	C	C	C	C
Bn-A01-p7560785	A/G/-	A01	6901133	+	NA	NA	NA	NA	NA	NA	G	G	G	A	G	G	G	G	G	G	G	G	G	G	R	G	G	G	G	G	G	G	G	G	G	G	G	R	G	G	G	G	G	G	G	G	G	A	G
Bn-A01-p7724859	T/G/-	A01	6978807	+	NA	NA	NA	NA	NA	NA	G	K	K	G	G	T	K	G	K	G	T	G	T	G	G	T	G	T	T	G	T	G	G	G	T	T	T	K	T	G	G	T	G	G	G	T	T	G	T
Bn-A01-p7787153	A/G/-	A01	7049040	+	NA	NA	NA	NA	NA	NA	G	A	A	A	G	A	G	G	R	G	G	G	G	G	G	A	G	G	G	G	G	G	G	G	A	A	A	R	A	G	G	G	G	G	G	A	A	G	G
Bn-A01-p7942548	T/C/-	A01	7118271	+	NA	NA	NA	NA	NA	NA	C	T	T	T	C	T	T	T	T	C	T	C	T	C	Y	T	C	C	C	T	C	C	C	C	C	C	C	T	T	C	C	T	C	C	C	C	C	T	T
Bn-A01-p7974551	T/C/-	A01	7156915	+	NA	NA	NA	NA	NA	NA	C	C	C	C	C	T	C	C	C	C	C	C	C	C	C	C	C	T	C	C	C	C	C	C	C	C	C	C	C	C	C	C	C	C	C	C	C	C	C
Bn-A01-p8043776	A/G/-	A01	7219664	+	NA	NA	NA	NA	NA	NA	A	A	A	A	A	A	A	A	A	A	A	A	A	A	A	A	A	A	A	A	A	A	A	A	A	A	A	A	A	A	A	A	A	A	A	A	A	A	A
Bn-A01-p8076080	A/G/-	A01	7255275	+	NA	NA	NA	NA	NA	NA	G	G	G	G	G	G	G	G	G	G	G	G	G	G	G	G	G	G	G	G	G	G	G	G	G	G	G	G	G	G	G	G	G	G	G	G	G	G	G
Bn-A01-p8108178	T/G/-	A01	7283813	+	NA	NA	NA	NA	NA	NA	T	T	T	T	T	T	T	G	K	T	T	-	T	T	T	T	G	G	T	T	T	T	T	T	T	T	T	T	T	T	T	T	G	T	T	T	T	T	T
Bn-A01-p8154524	A/G/-	A01	7338018	+	NA	NA	NA	NA	NA	NA	A	A	A	A	A	-	A	G	G	G	A	A	G	A	G	A	G	A	G	G	A	A	A	A	A	A	A	A	A	A	A	A	G	A	G	A	A	G	A
Bn-A01-p9170858	A/G/-	A01	7849996	+	NA	NA	NA	NA	NA	NA	G	A	G	A	G	A	A	G	A	A	A	A	A	G	A	G	A	G	A	G	G	G	G	G	G	G	G	R	A	G	A	A	A	G	A	G	G	A	A
Bn-A01-p9227229	A/C/-	A01	7895148	+	NA	NA	NA	NA	NA	NA	C	A	C	A	C	C	A	C	A	A	A	A	A	C	A	C	A	C	A	C	C	M	C	C	C	C	C	M	A	C	A	A	A	C	A	C	C	A	C
Bn-A01-p9331463	T/C/-	A01	7988751	+	NA	NA	NA	NA	NA	NA	T	T	T	T	T	T	T	T	T	T	T	T	T	T	T	T	T	T	T	T	T	T	T	T	T	T	T	T	T	T	T	T	T	T	T	T	T	T	T
Bn-scaff_18636_1-p17733	A/G/-	A01	8050090	+	NA	NA	NA	NA	NA	NA	G	G	G	G	G	G	G	G	G	G	G	G	G	G	G	G	G	G	G	G	G	G	G	G	G	G	G	G	G	G	G	G	G	G	G	G	G	G	G
Bn-A01-p9408018	T/C/-	A01	8053704	+	NA	NA	NA	NA	NA	NA	T	T	C	T	T	T	T	C	T	T	T	T	T	T	T	T	C	C	T	T	C	T	T	T	T	T	T	Y	T	T	T	T	T	T	T	T	T	T	T
Bn-A01-p9442471	A/G/-	A01	8092397	+	NA	NA	NA	NA	NA	NA	A	A	A	A	G	A	A	A	A	A	A	A	G	G	A	G	A	A	A	A	A	-	G	G	A	G	G	A	A	G	A	-	G	G	A	G	G	-	A
Bn-A01-p9445754	A/G/-	A01	8094528	+	NA	NA	NA	NA	NA	NA	A	A	A	A	G	A	A	A	A	A	A	A	G	G	A	G	A	A	A	A	A	R	G	G	A	G	G	A	A	G	A	A	G	G	A	G	G	-	A
Bn-A01-p9519478	A/C/-	A01	8155867	+	NA	NA	NA	NA	NA	NA	C	C	C	C	A	C	C	C	C	C	C	C	A	A	C	A	C	C	C	C	C	M	A	A	C	A	A	C	C	A	C	C	A	A	C	A	A	C	C
Bn-A01-p9519660	T/G/-	A01	8156049	+	NA	NA	NA	NA	NA	NA	G	G	G	G	T	G	G	G	G	G	G	G	T	T	G	T	G	G	G	G	G	K	T	T	G	T	-	G	G	T	G	G	T	T	G	T	T	G	G
Bn-A01-p9520409	A/C/-	A01	8156987	+	NA	NA	NA	NA	NA	NA	C	C	C	C	A	C	C	C	C	C	C	C	A	A	C	A	C	C	C	C	C	-	A	A	C	A	A	C	C	A	C	C	A	A	C	A	A	C	C
Bn-A01-p9699152	T/C/-	A01	8316136	+	NA	NA	NA	NA	NA	NA	T	T	T	T	T	T	T	T	T	C	T	C	T	T	T	T	T	C	C	T	T	Y	T	T	T	T	T	T	T	T	C	T	T	T	T	T	T	T	T
Bn-A01-p9711809	A/G/-	A01	8334397	+	NA	NA	NA	NA	NA	NA	G	G	G	G	G	G	G	G	G	A	G	A	G	G	G	G	G	A	A	G	G	-	G	G	G	G	G	G	G	G	A	G	G	G	G	G	G	G	G
Bn-scaff_19614_1-p106170	T/G/-	A01	8432706	+	NA	NA	NA	NA	NA	NA	G	G	G	G	G	G	G	G	G	G	G	K	T	G	G	G	G	K	-	G	G	G	G	G	G	G	G	-	G	G	G	G	G	G	G	G	G	G	G
Bn-A01-p9853365	A/C/-	A01	8480162	+	NA	NA	NA	NA	NA	NA	C	C	C	C	A	C	C	C	C	C	C	A	C	-	C	A	C	-	A	C	C	M	A	A	C	A	A	C	C	A	C	C	A	A	C	A	-	C	C
Bn-scaff_27129_1-p119948	T/G/-	A01	8555767	+	NA	NA	NA	NA	NA	NA	T	T	T	T	T	T	T	T	T	T	T	T	T	T	T	T	T	T	T	T	T	T	T	T	T	T	T	G	T	T	T	T	-	T	T	T	T	T	T
Bn-A05-p10840480	A/G/-	A01	8601093	+	NA	NA	NA	NA	NA	NA	R	R	R	R	R	R	R	R	R	R	R	R	R	R	R	R	R	R	R	R	R	R	R	R	R	R	R	G	R	R	R	R	R	R	R	R	R	G	R
Bn-A01-p10242217	T/G/-	A01	8840200	+	NA	NA	NA	NA	NA	NA	T	T	G	T	G	T	T	G	T	G	T	G	G	T	G	T	G	G	G	T	G	-	G	G	T	T	T	K	T	T	G	T	G	G	T	T	T	G	T
Bn-scaff_15747_1-p462246	T/C/-	A01	8917020	+	NA	NA	NA	NA	NA	NA	C	C	T	C	T	C	C	T	C	T	C	T	T	C	T	C	T	C	T	C	T	Y	T	T	C	C	C	Y	C	C	C	C	T	T	C	C	C	T	C
Bn-A01-p10889788	A/G/-	A01	8978767	+	NA	NA	NA	NA	NA	NA	A	A	G	A	A	A	A	G	A	A	A	A	G	A	A	A	G	A	A	A	G	A	A	A	A	A	A	R	A	A	A	A	A	A	A	A	A	A	A
Bn-A01-p10945930	A/C/-	A01	9046595	+	NA	NA	NA	NA	NA	NA	A	A	C	A	C	A	C	C	A	C	C	A	C	A	C	A	C	C	A	C	C	C	C	C	A	A	A	M	A	A	A	C	C	C	C	A	A	A	A
Bn-A01-p11054015	A/G/-	A01	9173272	+	NA	NA	NA	NA	NA	NA	A	A	G	A	A	A	A	G	A	A	A	A	A	A	A	A	R	A	A	A	G	A	A	A	A	A	A	R	A	A	A	A	A	A	A	A	A	A	A
Bn-A01-p11078406	T/C/-	A01	9180972	+	NA	NA	NA	NA	NA	NA	T	T	C	T	T	-	T	C	T	T	T	-	T	T	-	T	C	T	T	T	C	T	T	T	T	T	-	-	T	T	T	-	T	T	T	T	T	-	-
Bn-A01-p11091663	A/G/-	A01	9184134	+	NA	NA	NA	NA	NA	NA	A	A	G	A	A	A	A	G	A	A	A	A	A	A	A	A	R	A	A	A	G	A	A	A	A	A	A	R	A	A	A	A	A	A	A	A	A	A	A
Bn-A01-p11142752	T/C/-	A01	9218480	+	NA	NA	NA	NA	NA	NA	T	T	T	T	C	T	C	T	T	C	C	T	C	T	C	T	Y	C	T	C	T	C	C	C	T	T	T	T	T	T	C	C	C	C	C	T	T	T	T
Bn-A01-p11163980	T/C/-	A01	9233494	+	NA	NA	NA	NA	NA	NA	T	T	T	T	T	T	T	T	T	T	T	T	T	T	C	T	T	C	T	T	T	T	T	T	T	T	T	T	T	T	T	T	T	T	T	T	T	T	T
Bn-A01-p11233207	A/C/-	A01	9297623	+	NA	NA	NA	NA	NA	NA	C	C	A	C	A	C	A	A	C	A	A	A	A	C	A	C	A	A	A	A	A	A	A	A	C	C	C	M	C	C	A	A	A	A	A	C	C	C	C
Bn-A01-p11306490	A/C/-	A01	9392926	+	NA	NA	NA	NA	NA	NA	C	C	A	C	C	C	C	A	C	C	C	C	C	C	C	C	M	A	C	C	A	C	C	C	C	C	C	M	C	C	C	C	C	C	C	C	C	C	C
Bn-A01-p10499882	A/G/-	A01	9484805	+	NA	NA	NA	NA	NA	NA	A	G	A	A	A	A	A	A	A	A	A	A	A	G	A	G	A	A	A	A	A	A	A	A	A	G	G	A	A	G	A	A	A	A	A	G	G	G	A
Bn-A01-p10693617	A/C/-	A01	9609388	+	NA	NA	NA	NA	NA	NA	C	C	A	C	C	C	A	A	C	C	A	C	A	C	A	C	A	A	C	A	A	C	C	C	C	C	C	A	C	C	A	A	C	C	A	C	C	C	C
Bn-A01-p11434769	A/C/-	A01	9788080	+	NA	NA	NA	NA	NA	NA	A	A	C	A	A	A	A	C	A	A	A	A	A	A	A	A	-	A	A	A	C	A	A	A	A	A	A	A	A	A	A	A	A	A	A	A	A	A	A
Bn-A01-p11469992	T/C/-	A01	9817818	+	NA	NA	NA	NA	NA	NA	T	T	C	T	C	T	C	C	T	C	C	C	C	T	C	T	C	C	C	C	C	C	C	C	T	T	T	C	T	T	C	C	C	C	C	T	T	T	T
Bn-A01-p11479565	T/C/-	A01	9827000	+	NA	NA	NA	NA	NA	NA	T	C	C	T	T	T	T	C	T	T	T	T	T	C	T	C	Y	T	T	T	C	T	T	T	T	C	C	-	T	C	T	T	T	T	T	C	C	C	T
Bn-A01-p11702957	T/G/-	A01	9984798	+	NA	NA	NA	NA	NA	NA	T	G	G	T	G	T	T	G	T	G	T	G	T	G	G	G	G	G	G	G	G	G	G	G	T	G	G	K	T	G	G	G	G	G	G	G	G	G	T
Bn-A01-p11830957	A/G/-	A01	10142601	+	NA	NA	NA	NA	NA	NA	A	G	A	A	G	A	G	A	A	A	G	A	G	G	G	G	R	A	A	A	A	G	G	G	A	-	G	R	A	G	G	A	G	G	A	G	G	A	A
Bn-Scaffold000444-p5763	A/G/-	A01	10254967	+	NA	NA	NA	NA	NA	NA	A	A	G	A	A	A	A	G	A	G	A	G	A	A	A	A	R	G	G	G	G	R	A	A	A	A	A	R	A	A	A	G	A	A	G	A	A	G	A
Bn-A01-p11947255	A/G/-	A01	10281087	+	NA	NA	NA	NA	NA	NA	A	G	A	A	G	A	G	A	A	A	G	A	G	G	G	G	R	A	A	A	A	G	G	G	A	G	G	R	A	G	G	A	G	G	A	G	G	A	A
Bn-A01-p11951605	T/G/-	A01	10290337	+	NA	NA	NA	NA	NA	NA	T	G	T	T	G	T	G	T	T	T	G	T	G	G	G	G	K	T	T	T	T	K	G	G	T	G	G	K	T	G	G	T	G	G	T	G	G	T	T
Bn-A01-p12138089	T/C/-	A01	10335500	+	NA	NA	NA	NA	NA	NA	C	T	T	C	T	C	C	T	C	T	C	C	C	T	C	T	T	T	C	T	T	T	T	T	C	T	T	-	C	T	C	T	T	T	T	T	T	C	C
Bn-A01-p12237534	T/G/-	A01	10421790	+	NA	NA	NA	NA	NA	NA	T	G	T	T	T	T	T	T	T	T	T	T	T	G	G	G	T	G	T	G	T	K	T	T	T	G	G	T	T	G	G	G	T	T	G	G	G	G	T
Bn-A01-p12257699	A/C/-	A01	10446561	+	NA	NA	NA	NA	NA	NA	C	C	A	C	A	C	A	A	C	A	A	A	A	C	C	C	A	C	A	C	A	A	A	A	C	C	C	A	C	C	C	C	A	A	C	C	C	C	C
Bn-A01-p12305025	A/G/-	A01	10489606	+	NA	NA	NA	NA	NA	NA	G	G	A	G	A	G	A	A	G	A	A	G	A	G	G	G	A	G	G	G	A	A	A	A	G	G	G	A	G	G	G	G	A	A	G	G	G	G	G
Bn-A01-p12350104	T/C/-	A01	10537555	+	NA	NA	NA	NA	NA	NA	C	C	T	C	T	C	T	T	C	T	T	T	T	C	C	C	T	C	T	C	T	Y	T	T	C	C	C	T	C	C	C	C	T	T	C	C	C	C	C
Bn-A01-p12560952	A/C/-	A01	10769520	+	NA	NA	NA	NA	NA	NA	C	A	C	C	C	C	C	C	C	A	C	A	C	A	A	A	C	A	A	A	C	C	C	C	C	A	A	M	C	A	A	A	C	C	A	A	A	A	C
Bn-A01-p12580778	A/G/-	A01	10789584	+	NA	NA	NA	NA	NA	NA	G	A	G	G	G	G	G	G	G	A	G	A	G	A	A	A	G	A	A	A	G	R	G	G	G	A	A	A	G	A	A	A	G	G	A	A	A	A	G
Bn-Scaffold000300-p17011	A/G/-	A01	10832440	+	NA	NA	NA	NA	NA	NA	G	A	G	G	G	G	G	G	G	A	G	A	G	A	A	A	G	A	A	A	G	R	G	G	G	A	A	G	G	A	A	A	G	G	A	A	A	A	G
Bn-Scaffold000300-p29536	A/G/-	A01	10848185	+	NA	NA	NA	NA	NA	NA	G	A	G	G	G	G	G	G	G	A	G	A	G	A	A	A	G	A	A	A	G	G	G	G	G	A	A	G	G	A	A	-	G	G	A	A	A	-	G
Bn-A01-p12622123	T/C/-	A01	10872512	+	NA	NA	NA	NA	NA	NA	T	C	T	T	T	T	T	T	T	C	T	C	T	C	C	C	T	C	C	C	T	-	T	T	T	C	C	-	T	C	C	C	T	T	C	C	C	C	T
Bn-A01-p12665250	T/C/-	A01	10918704	+	NA	NA	NA	NA	NA	NA	C	T	C	C	C	C	C	C	C	T	C	C	C	T	T	T	C	T	C	T	C	Y	C	T	C	T	T	C	C	T	T	T	C	C	T	T	T	T	C
Bn-A01-p14247718	T/C/-	A01	11868535	+	NA	NA	NA	NA	NA	NA	T	T	T	C	C	C	C	T	C	T	C	C	C	T	T	T	Y	T	C	T	T	-	C	T	C	T	T	Y	C	T	C	T	C	C	T	T	T	T	C
Bn-A01-p14901403	A/G/-	A01	12386121	+	NA	NA	NA	NA	NA	NA	G	G	A	A	A	A	A	A	A	G	A	A	A	G	G	G	A	G	A	G	A	-	A	G	A	G	G	A	A	G	A	G	A	A	G	G	G	G	A
Bn-A01-p14917697	T/G/-	A01	12406288	+	NA	NA	NA	NA	NA	NA	T	T	G	G	G	G	G	G	G	G	G	G	G	T	G	T	G	G	G	G	G	G	G	G	G	T	T	G	G	T	G	G	G	G	G	T	T	G	G
Bn-A01-p14943499	T/C/-	A01	12448568	+	NA	NA	NA	NA	NA	NA	T	T	C	C	C	C	C	C	C	T	C	C	C	T	T	T	C	T	C	T	C	C	C	T	C	T	T	C	C	T	T	-	C	C	T	T	T	T	C
Bn-A01-p15090383	T/G/-	A01	12600998	+	NA	NA	NA	NA	NA	NA	T	T	T	T	T	T	T	T	T	G	T	T	T	T	G	T	T	G	T	K	T	T	T	G	T	T	T	T	T	T	K	G	T	T	G	T	T	G	T
Bn-A01-p15095213	T/C/-	A01	12605833	+	NA	NA	NA	NA	NA	NA	T	T	T	T	T	T	T	T	T	C	T	T	T	T	C	T	T	C	T	C	T	-	T	C	T	T	T	T	T	T	C	C	T	T	C	T	T	C	T
Bn-A01-p15095524	A/C/-	A01	12606110	+	NA	NA	NA	NA	NA	NA	C	C	C	C	C	C	C	C	C	A	C	C	C	C	A	C	C	A	C	A	C	C	C	A	C	C	C	C	C	C	A	A	C	C	A	C	C	A	C
Bn-A01-p15401259	A/C/-	A01	12837841	+	NA	NA	NA	NA	NA	NA	C	A	C	C	C	C	C	C	C	A	C	C	C	A	A	A	C	A	C	A	C	-	C	A	C	A	A	C	C	A	A	A	C	C	A	A	A	A	C
Bn-A01-p15446864	T/C/-	A01	12894492	+	NA	NA	NA	NA	NA	NA	C	T	C	C	C	C	C	C	C	T	C	C	C	T	T	T	C	T	C	T	C	C	C	T	C	T	T	C	C	T	T	T	C	C	T	T	T	T	C
Bn-A01-p15494469	A/G/-	A01	12939040	+	NA	NA	NA	NA	NA	NA	A	G	A	A	A	A	A	A	A	G	A	A	A	G	G	G	A	G	A	G	A	R	A	G	A	G	G	A	A	G	G	G	A	A	G	G	G	G	A
Bn-A05-p3429612	T/G/-	A01	14050719	+	NA	NA	NA	NA	NA	NA	T	T	T	T	T	T	T	T	T	T	T	G	T	T	G	T	K	T	T	T	T	T	T	T	T	T	T	T	T	T	T	T	T	T	G	T	-	G	G
Bn-A01-p16123649	T/C/-	A01	14061607	+	NA	NA	NA	NA	NA	NA	T	T	T	C	C	C	C	T	C	T	C	C	C	T	T	T	Y	T	C	T	T	Y	C	T	C	T	T	Y	C	T	C	T	C	C	T	T	T	T	C
Bn-A01-p16331424	T/C/-	A01	14240261	+	NA	NA	NA	NA	NA	NA	C	C	C	T	T	T	T	C	T	C	T	T	T	C	C	C	Y	C	T	C	C	T	T	C	T	C	C	C	T	C	T	C	T	T	C	C	C	C	T
Bn-A01-p16454615	T/C/-	A01	14358520	+	NA	NA	NA	NA	NA	NA	T	T	T	C	C	C	C	T	C	T	C	C	C	T	T	T	Y	T	C	T	T	C	C	T	C	T	T	T	C	T	C	T	C	C	T	T	T	T	C
Bn-A01-p16537866	A/G/-	A01	14420140	+	NA	NA	NA	NA	NA	NA	G	G	G	A	A	A	A	G	A	G	A	A	A	G	G	G	R	G	A	G	G	-	A	G	A	G	G	R	A	G	A	G	A	A	G	G	G	A	A
Bn-A01-p16598652	T/G/-	A01	14478823	+	NA	NA	NA	NA	NA	NA	G	G	G	T	T	T	T	G	T	G	T	T	T	G	G	G	K	G	T	G	G	-	T	G	T	G	G	K	T	G	T	G	T	T	G	G	G	T	T
Bn-A01-p16720365	A/G/-	A01	14573453	+	NA	NA	NA	NA	NA	NA	G	G	G	A	G	A	A	G	A	G	A	A	A	G	G	G	G	G	A	G	G	G	G	G	A	G	G	G	A	G	A	G	G	G	G	G	G	G	A
Bn-A01-p16730334	T/C/-	A01	14587549	+	NA	NA	NA	NA	NA	NA	C	C	C	T	-	T	T	C	T	C	T	T	T	C	C	C	C	C	T	C	C	C	C	C	T	C	C	C	T	C	T	C	C	C	C	C	C	C	T
Bn-A01-p16749946	T/C/-	A01	14602802	+	NA	NA	NA	NA	NA	NA	T	T	T	C	C	C	C	T	C	T	C	C	C	T	T	T	Y	T	C	T	T	Y	C	T	C	T	T	Y	C	T	C	T	C	C	T	T	T	C	C
Bn-A01-p16829363	T/G/-	A01	14653681	+	NA	NA	NA	NA	NA	NA	G	G	G	T	G	T	T	G	T	G	T	T	T	G	G	G	G	G	T	G	G	G	G	G	T	G	G	K	T	G	T	G	G	G	G	G	G	G	T
Bn-A01-p16847535	T/G/-	A01	14671327	+	NA	NA	NA	NA	NA	NA	T	T	T	T	G	T	T	T	T	T	T	T	T	T	T	T	K	T	T	T	T	K	G	T	T	T	T	T	T	T	T	T	G	G	T	T	T	T	T
Bn-A01-p16943370	T/C/-	A01	14794535	+	NA	NA	NA	NA	NA	NA	C	C	C	T	C	T	T	C	T	C	T	T	T	C	C	C	C	C	T	C	C	C	C	C	T	C	C	Y	T	C	T	C	C	C	C	C	C	C	T
Bn-A01-p16997658	A/G/-	A01	14848522	+	NA	NA	NA	NA	NA	NA	G	G	G	A	A	A	A	G	A	G	A	A	A	G	G	G	R	G	A	G	G	A	A	G	A	G	G	A	A	G	G	G	A	A	G	G	G	G	A
Bn-A01-p17482037	A/G/-	A01	14930402	+	NA	NA	NA	NA	NA	NA	A	A	A	A	A	A	G	A	A	A	G	G	G	A	A	A	A	A	A	A	A	A	A	A	A	A	A	A	A	A	A	A	A	A	A	A	A	A	A
Bn-A01-p17483006	A/C/-	A01	14931350	+	NA	NA	NA	NA	NA	NA	A	A	A	A	A	A	C	A	A	A	C	C	C	A	A	A	A	A	A	A	A	A	A	A	A	A	A	A	A	A	A	A	A	A	A	A	A	A	A
Bn-A01-p17518104	T/C/-	A01	14955341	+	NA	NA	NA	NA	NA	NA	T	T	T	C	T	C	C	T	C	T	C	C	C	T	T	T	T	T	T	T	T	T	T	T	C	T	T	T	C	T	T	T	T	T	T	T	T	T	C
Bn-A01-p17518468	T/G/-	A01	14955713	+	NA	NA	NA	NA	NA	NA	G	G	G	G	G	G	T	G	G	G	T	G	T	G	G	G	G	G	G	G	G	G	G	G	G	G	G	G	G	G	G	G	G	G	G	G	G	G	G
Bn-scaff_16929_1-p842076	T/C/-	A01	14967998	+	NA	NA	NA	NA	NA	NA	C	C	C	C	C	C	T	C	C	C	T	C	T	C	C	C	C	C	C	C	C	C	C	C	C	C	C	C	C	C	C	C	C	C	C	C	C	C	C
Bn-A01-p17548227	A/C/-	A01	14968114	+	NA	NA	NA	NA	NA	NA	C	C	C	C	C	C	A	C	C	C	A	A	A	C	C	C	C	C	C	C	C	C	C	C	C	C	C	C	C	C	C	C	C	C	C	C	C	C	C
Bn-A01-p17553462	T/C/-	A01	14973171	+	NA	NA	NA	NA	NA	NA	T	T	T	T	T	T	C	T	T	T	C	T	C	T	T	T	T	T	T	T	T	T	T	T	T	T	T	T	T	T	T	T	T	T	T	T	T	T	T
Bn-A01-p17574483	A/C/-	A01	15011514	+	NA	NA	NA	NA	NA	NA	A	A	A	A	A	A	C	A	A	A	C	C	C	A	A	A	A	A	A	A	A	A	A	A	A	A	A	A	A	A	A	A	A	A	A	A	A	A	A
Bn-A01-p17577426	T/C/-	A01	15014120	+	NA	NA	NA	NA	NA	NA	T	T	T	C	C	C	T	T	C	T	T	T	T	T	T	T	Y	C	T	T	T	C	C	T	C	T	T	T	C	T	T	T	C	C	T	T	T	T	C
Bn-A01-p17629628	A/C/-	A01	15126473	+	NA	NA	NA	NA	NA	NA	C	C	C	C	C	C	A	C	C	C	A	C	A	C	C	C	C	C	C	C	C	C	C	C	C	C	C	C	C	C	C	C	C	C	C	C	C	C	C
Bn-A01-p17649002	T/G/-	A01	15142705	+	NA	NA	NA	NA	NA	NA	G	G	G	K	T	K	G	G	T	G	G	T	G	G	G	G	K	T	G	G	G	K	T	G	T	G	G	G	T	G	G	G	T	T	G	G	G	G	K
Bn-A01-p18028380	A/G/-	A01	15347828	+	NA	NA	NA	NA	NA	NA	A	A	A	A	A	A	G	A	A	A	G	A	G	A	A	A	A	-	A	A	A	A	A	A	A	A	A	A	A	A	A	A	A	A	A	A	A	A	A
Bn-scaff_16929_1-p85470	T/C/-	A01	15354667	+	NA	NA	NA	NA	NA	NA	C	C	C	C	C	C	T	C	C	C	T	C	Y	C	C	C	C	-	Y	C	C	C	C	C	C	C	C	C	C	C	C	C	C	C	C	C	C	C	C
Bn-A01-p18063416	T/C/-	A01	15371856	+	NA	NA	NA	NA	NA	NA	T	T	T	T	T	T	C	T	T	T	C	T	C	T	T	T	T	T	T	T	T	T	T	T	T	T	T	T	T	T	T	T	T	T	T	T	T	T	T
Bn-A01-p18078718	A/G/-	A01	15382241	+	NA	NA	NA	NA	NA	NA	A	A	A	A	G	A	G	A	A	G	G	G	G	A	G	A	R	-	A	A	A	G	G	G	A	A	A	A	A	A	A	A	G	G	G	A	A	G	A
Bn-A01-p17081703	T/C/-	A01	15454481	+	NA	NA	NA	NA	NA	NA	T	T	T	T	T	T	T	T	T	T	T	C	T	T	T	T	T	T	C	T	T	T	T	T	T	T	T	T	T	T	T	T	T	T	T	T	T	T	T
Bn-A01-p17105672	A/G/-	A01	15487141	+	NA	NA	NA	NA	NA	NA	A	A	A	A	G	A	A	A	A	A	A	G	A	A	A	A	R	A	G	A	A	G	G	A	A	A	A	A	A	A	A	A	G	G	A	A	A	A	A
Bn-A01-p17118647	A/G/-	A01	15506771	+	NA	NA	NA	NA	NA	NA	A	A	A	A	A	A	A	A	A	A	A	G	A	A	A	A	A	A	G	A	A	A	A	A	A	A	A	A	A	A	A	A	A	A	A	A	A	A	A
Bn-A01-p17121291	A/G/-	A01	15509434	+	NA	NA	NA	NA	NA	NA	A	A	A	A	A	A	A	A	A	A	A	G	A	A	A	A	A	A	G	A	A	A	A	A	A	A	A	A	A	A	A	A	A	A	A	A	A	A	A
Bn-A01-p17124558	T/C/-	A01	15512701	+	NA	NA	NA	NA	NA	NA	C	C	C	C	C	C	C	C	C	C	C	T	C	C	C	C	C	C	T	C	C	C	C	C	C	C	C	C	C	C	C	C	C	C	C	C	C	C	C
Bn-A01-p17129906	A/C/-	A01	15518053	+	NA	NA	NA	NA	NA	NA	A	A	A	A	A	A	A	A	A	A	A	C	A	A	A	A	A	A	C	A	A	A	A	A	A	A	A	A	A	A	A	A	A	A	A	A	A	A	A
Bn-A01-p17150604	T/C/-	A01	15538587	+	NA	NA	NA	NA	NA	NA	C	C	C	T	C	T	T	C	T	C	T	C	T	C	C	C	C	C	C	C	C	C	C	C	T	C	C	Y	T	C	C	C	C	C	C	C	C	C	T
Bn-A01-p17159109	T/C/-	A01	15547003	+	NA	NA	NA	NA	NA	NA	C	C	C	T	C	T	C	C	T	C	C	T	C	C	C	C	C	C	T	C	C	C	C	C	T	C	C	C	T	C	C	C	C	C	C	C	C	C	T
Bn-A01-p17160355	A/G/-	A01	15551512	+	NA	NA	NA	NA	NA	NA	A	A	A	A	G	A	G	A	A	A	G	A	G	A	A	A	R	G	A	A	A	R	G	A	A	A	A	R	A	A	A	A	G	G	A	A	A	A	A
Bn-A01-p17165052	T/C/-	A01	15556122	+	NA	NA	NA	NA	NA	NA	C	C	C	T	T	T	T	C	T	C	T	C	T	C	C	C	-	T	C	C	C	-	T	C	T	C	C	C	T	C	C	C	T	T	C	C	C	C	T
Bn-A01-p17165303	A/G/-	A01	15556380	+	NA	NA	NA	NA	NA	NA	G	G	G	G	A	-	A	G	G	G	A	G	A	G	G	G	-	A	G	G	G	-	A	G	G	G	G	G	G	G	G	G	A	A	G	G	G	G	G
Bn-A01-p17187327	T/C/-	A01	15577786	+	NA	NA	NA	NA	NA	NA	C	C	C	C	C	C	C	C	C	C	C	C	C	C	C	C	C	C	C	C	C	C	C	C	C	C	C	C	C	C	C	C	C	C	C	C	C	C	C
Bn-A01-p18096974	A/C/-	A01	15587712	+	NA	NA	NA	NA	NA	NA	A	A	A	A	C	A	A	A	A	C	A	C	A	A	C	A	M	-	A	A	A	-	C	C	A	A	A	A	A	A	A	A	C	C	C	A	A	C	A
Bn-A01-p18100900	A/C/-	A01	15596549	+	NA	NA	NA	NA	NA	NA	A	A	A	A	A	A	C	A	A	A	C	A	C	A	A	A	A	-	A	A	A	A	A	A	A	A	A	A	A	A	A	A	A	A	A	A	A	A	A
Bn-A01-p18121827	T/C/-	A01	15607592	+	NA	NA	NA	NA	NA	NA	T	T	T	T	T	T	C	T	T	T	C	T	C	T	T	T	T	T	C	T	T	T	T	T	T	T	T	T	T	T	T	T	T	T	T	T	T	T	T
Bn-A01-p18182766	A/C/-	A01	15669812	+	NA	NA	NA	NA	NA	NA	A	A	A	C	C	C	A	A	C	C	A	C	A	A	C	A	M	C	A	A	A	C	C	C	C	A	A	A	C	A	A	A	C	C	C	A	A	C	C
Bn-A01-p18260283	A/G/-	A01	15763518	+	NA	NA	NA	NA	NA	NA	G	G	G	G	A	G	G	G	G	A	G	A	G	G	A	G	R	A	A	G	G	-	A	A	G	G	G	G	G	G	G	G	A	A	A	G	G	A	G
Bn-A01-p18306617	A/G/-	A01	15815977	+	NA	NA	NA	NA	NA	NA	A	A	A	A	A	A	G	A	A	A	G	A	G	A	A	A	A	A	A	A	A	A	A	A	A	A	A	A	A	A	A	A	A	A	A	A	A	A	A
Bn-A01-p18329609	T/C/-	A01	15846466	+	NA	NA	NA	NA	NA	NA	T	T	T	C	C	C	T	T	C	T	T	C	T	T	C	T	Y	C	T	T	T	Y	C	C	C	T	T	T	C	T	C	T	C	C	T	T	T	C	C
Bn-A01-p18330598	A/G/-	A01	15847455	+	NA	NA	NA	NA	NA	NA	A	A	A	G	G	G	A	A	G	A	A	G	A	A	G	A	R	G	A	A	A	R	G	G	G	A	A	A	G	A	G	A	G	G	A	A	A	G	G
Bn-A01-p18391341	T/C/-	A01	15903771	+	NA	NA	NA	NA	NA	NA	C	C	C	T	C	T	C	T	T	T	C	C	C	C	C	C	-	C	C	T	T	Y	C	C	T	C	C	T	T	C	C	T	C	C	C	C	C	T	T
Bn-A01-p18435876	T/C/-	A01	15938324	+	NA	NA	NA	NA	NA	NA	T	T	T	T	T	T	T	C	T	T	T	T	T	T	T	T	Y	T	T	C	C	Y	T	T	T	T	T	C	T	T	T	C	T	T	T	T	T	T	T
Bn-A01-p19446599	T/C/-	A01	16300597	+	NA	NA	NA	NA	NA	NA	C	C	C	C	C	C	Y	C	C	C	Y	C	Y	C	C	C	C	C	C	C	C	C	C	C	C	C	C	C	C	C	C	C	C	C	C	C	C	C	C
Bn-A04-p1756591	A/G/-	A01	16317351	+	NA	NA	NA	NA	NA	NA	G	G	G	G	G	G	A	G	G	G	A	G	A	G	G	G	G	G	G	G	G	G	G	G	G	G	G	G	G	G	G	G	G	G	G	G	G	G	G
Bn-A01-p19498222	A/G/-	A01	16338589	+	NA	NA	NA	NA	NA	NA	G	G	G	G	G	G	A	G	G	G	A	A	A	G	A	G	G	A	G	G	G	G	G	G	G	G	G	G	G	G	A	G	G	G	G	G	G	G	G
Bn-A01-p19512499	A/G/-	A01	16375685	+	NA	NA	NA	NA	NA	NA	A	A	A	G	A	G	G	A	G	A	G	A	G	A	A	A	R	A	A	A	A	A	A	G	G	A	A	A	G	A	A	G	G	G	A	A	A	G	G
Bn-A01-p19525594	A/C/-	A01	16388180	+	NA	NA	NA	NA	NA	NA	C	C	C	A	C	A	C	C	A	C	C	C	C	C	C	C	M	C	C	C	C	C	C	A	A	C	C	C	A	C	C	A	A	A	C	C	C	A	A
Bn-A01-p19527588	T/C/-	A01	16390210	+	NA	NA	NA	NA	NA	NA	C	C	C	T	C	T	C	C	T	C	C	C	C	C	C	C	Y	C	C	C	C	C	C	T	T	C	C	C	T	C	C	T	T	T	C	C	C	T	T
Bn-A01-p19533568	T/C/-	A01	16397173	+	NA	NA	NA	NA	NA	NA	T	T	T	C	T	C	T	T	C	T	T	T	T	T	T	T	Y	T	T	T	T	T	T	C	C	T	T	T	C	T	T	C	C	C	T	T	T	C	C
Bn-A01-p19540960	A/C/-	A01	16401540	+	NA	NA	NA	NA	NA	NA	C	C	C	A	C	A	C	C	A	C	C	C	C	C	C	C	M	C	C	C	C	C	C	A	A	C	C	C	A	C	C	A	A	A	C	C	C	A	A
Bn-A01-p19564015	A/G/-	A01	16411121	+	NA	NA	NA	NA	NA	NA	G	G	G	A	A	A	G	A	A	A	G	G	G	G	G	G	A	G	A	A	A	A	A	A	A	G	G	A	A	G	G	A	A	A	A	G	G	A	A
Bn-A01-p19577901	T/C/-	A01	16420427	+	NA	NA	NA	NA	NA	NA	Y	Y	Y	C	C	C	T	C	C	-	Y	Y	Y	Y	Y	Y	C	T	C	C	C	C	-	C	C	Y	Y	C	C	Y	Y	C	C	C	C	Y	Y	C	C
Bn-A01-p19602112	T/C/-	A01	16442072	+	NA	NA	NA	NA	NA	NA	T	T	T	C	C	C	T	C	C	C	T	T	T	T	T	T	C	T	C	C	C	C	C	C	C	T	T	C	C	T	T	C	C	C	C	T	T	C	C
Bn-A01-p19607256	A/C/-	A01	16447786	+	NA	NA	NA	NA	NA	NA	A	A	A	C	C	C	A	C	C	C	A	C	A	A	C	A	C	C	C	C	C	C	C	C	C	A	A	C	C	A	C	C	C	C	C	A	A	C	C
Bn-A01-p19617963	T/C/-	A01	16454913	+	NA	NA	NA	NA	NA	NA	T	T	T	C	C	C	T	C	C	C	T	T	T	T	T	T	C	T	C	C	C	C	C	C	C	T	T	C	C	T	T	C	C	C	C	T	T	C	C
Bn-A01-p19624123	T/G/-	A01	16460092	+	NA	NA	NA	NA	NA	NA	T	T	T	G	G	G	T	G	G	G	T	T	T	T	T	T	G	T	G	G	G	G	G	G	G	T	T	G	G	T	T	G	G	G	G	T	T	G	G
Bn-A01-p19624216	T/G/-	A01	16460185	+	NA	NA	NA	NA	NA	NA	T	T	T	G	G	G	T	G	G	G	T	T	T	T	T	T	G	T	G	G	G	G	G	G	G	T	T	G	G	T	T	G	G	G	G	T	T	G	G
Bn-A01-p19650666	T/G/-	A01	16469624	+	NA	NA	NA	NA	NA	NA	T	T	T	G	G	G	G	G	G	G	G	T	G	T	G	T	G	T	G	G	G	G	G	G	G	T	T	G	G	T	G	G	G	G	G	T	T	G	G
Bn-A01-p19661033	T/C/-	A01	16470988	+	NA	NA	NA	NA	NA	NA	C	C	C	T	C	T	C	C	T	C	C	C	C	C	C	C	Y	C	C	C	C	C	C	T	T	C	C	C	T	C	C	T	Y	T	C	C	C	Y	T
Bn-A01-p19700004	A/G/-	A01	16508776	+	NA	NA	NA	NA	NA	NA	G	G	G	G	A	G	A	A	G	A	A	G	A	G	A	G	R	G	A	A	A	A	A	G	G	G	G	A	G	G	G	G	G	G	A	G	G	G	G
Bn-A01-p19731678	A/G/-	A01	16530724	+	NA	NA	NA	NA	NA	NA	G	G	G	G	A	G	A	A	G	A	A	G	A	G	A	G	R	G	A	A	A	A	A	G	G	G	G	A	G	G	G	G	G	G	A	G	G	G	G
Bn-scaff_16055_1-p1543652	A/G/-	A01	16533358	+	NA	NA	NA	NA	NA	NA	A	A	A	A	A	A	G	A	A	G	A	A	A	A	A	A	A	G	A	A	A	R	G	G	A	A	A	A	A	A	A	A	G	A	A	A	A	G	A
Bn-A01-p19762477	T/G/-	A01	16559791	+	NA	NA	NA	NA	NA	NA	G	G	G	G	T	G	T	T	G	T	T	G	T	G	T	G	-	G	T	T	T	T	T	G	G	G	G	T	G	G	G	G	G	G	T	G	G	G	G
Bn-A01-p19764240	A/G/-	A01	16561549	+	NA	NA	NA	NA	NA	NA	G	G	G	G	A	G	A	A	G	A	A	G	A	G	A	G	R	G	A	A	A	A	A	G	G	G	G	A	G	G	A	G	G	G	A	G	G	A	G
Bn-A01-p19803988	A/G/-	A01	16591763	+	NA	NA	NA	NA	NA	NA	G	G	G	G	A	G	A	A	G	A	A	G	A	G	A	G	R	G	A	A	A	A	A	G	G	G	G	A	G	G	A	G	G	G	A	G	G	A	G
Bn-A01-p19813138	T/C/-	A01	16601252	+	NA	NA	NA	NA	NA	NA	C	C	C	C	T	C	T	T	C	T	T	C	T	C	T	C	Y	C	T	T	T	T	T	C	C	C	C	T	C	C	T	C	C	C	T	C	C	T	C
Bn-A01-p19840597	T/G/-	A01	16647337	+	NA	NA	NA	NA	NA	NA	G	G	G	G	G	G	T	G	G	G	T	G	T	G	G	G	G	G	G	G	G	G	G	G	G	G	G	G	G	G	G	G	G	G	G	G	G	G	G
Bn-A01-p19879925	T/G/-	A01	16671599	+	NA	NA	NA	NA	NA	NA	T	T	T	T	T	T	G	T	T	T	-	T	G	T	T	T	T	T	T	T	T	T	T	T	T	T	T	T	T	T	T	T	T	T	T	T	T	T	T
Bn-A01-p19931596	T/C/-	A01	16721456	+	NA	NA	NA	NA	NA	NA	C	C	C	C	C	C	T	C	C	C	T	C	T	C	C	C	C	C	C	C	C	C	C	C	C	C	C	C	C	C	C	C	C	C	C	C	C	C	C
Bn-A01-p19961176	A/C/-	A01	16758190	+	NA	NA	NA	NA	NA	NA	C	C	C	C	C	C	A	A	C	C	A	C	A	C	C	C	M	C	C	A	A	C	C	C	C	C	C	C	C	C	A	A	C	C	C	C	C	A	C
Bn-A01-p20166016	A/G/-	A01	16946565	+	NA	NA	NA	NA	NA	NA	G	G	G	G	G	G	A	A	G	G	A	G	A	G	G	G	R	G	G	A	A	G	G	G	G	G	G	G	G	G	A	G	G	G	G	G	G	A	G
Bn-A01-p20167230	A/G/-	A01	16947782	+	NA	NA	NA	NA	NA	NA	A	A	A	A	A	A	G	G	A	A	G	A	G	A	A	A	R	A	A	G	G	A	A	A	A	A	A	A	A	A	G	A	A	A	A	A	A	G	A
Bn-A01-p20181346	T/C/-	A01	16957181	+	NA	NA	NA	NA	NA	NA	C	C	C	C	C	C	T	C	C	C	T	C	T	C	C	C	C	C	C	C	C	C	C	C	C	C	C	C	C	C	C	C	C	C	C	C	C	C	C
Bn-A01-p20207440	T/C/-	A01	17000139	+	NA	NA	NA	NA	NA	NA	T	T	T	T	C	T	C	T	T	C	C	T	C	T	T	T	T	C	C	T	T	C	C	T	T	T	T	T	T	T	T	T	T	T	T	T	T	T	T
Bn-A01-p20211329	T/C/-	A01	17004019	+	NA	NA	NA	NA	NA	NA	C	C	C	C	C	C	T	T	C	C	T	T	T	C	T	C	Y	C	C	T	T	C	C	C	C	C	C	T	C	C	T	C	C	C	C	C	C	T	C
Bn-A01-p20211387	A/G/-	A01	17004077	+	NA	NA	NA	NA	NA	NA	A	A	A	A	A	A	G	G	A	A	G	G	G	A	G	A	R	A	A	G	G	A	A	A	A	A	A	G	A	A	G	A	A	A	A	A	A	G	A
Bn-A01-p20397807	T/C/-	A01	17194080	+	NA	NA	NA	NA	NA	NA	T	C	T	C	-	C	C	T	C	T	C	-	C	T	T	T	T	T	T	T	T	T	T	T	C	-	T	T	C	T	-	T	T	T	T	T	T	T	C
Bn-Scaffold001599-p514	T/C/-	A01	17235224	+	NA	NA	NA	NA	NA	NA	C	C	C	T	C	C	T	C	C	C	T	C	T	C	C	C	C	C	C	C	C	C	C	C	C	C	C	C	C	C	C	C	C	C	C	C	C	C	C
Bn-A01-p20431228	A/G/-	A01	17238370	+	NA	NA	NA	NA	NA	NA	G	A	G	A	G	A	A	G	A	G	A	G	A	G	G	G	G	G	G	G	G	G	G	G	A	G	G	G	A	G	G	G	G	G	G	G	G	G	A
Bn-A01-p20471502	T/C/-	A01	17258936	+	NA	NA	NA	NA	NA	NA	C	C	C	T	T	C	T	T	C	T	T	T	T	T	T	T	T	T	T	T	T	T	T	T	C	T	T	T	C	T	T	T	T	T	T	C	T	T	C
Bn-A01-p20564016	A/G/-	A01	17369813	+	NA	NA	NA	NA	NA	NA	G	G	G	G	A	G	G	A	G	A	G	A	G	A	A	A	A	A	G	A	A	A	A	A	G	A	A	A	G	A	A	A	A	A	A	G	A	A	G
Bn-A01-p20745330	A/G/-	A01	17545013	+	NA	NA	NA	NA	NA	NA	G	G	G	G	A	G	G	A	G	A	G	A	G	A	A	A	A	A	A	A	A	A	A	A	G	A	A	A	G	A	A	A	A	A	A	G	A	A	G
Bn-A01-p20805506	T/G/-	A01	17597616	+	NA	NA	NA	NA	NA	NA	G	G	G	G	T	G	G	T	G	T	G	T	G	T	T	T	T	T	T	T	T	T	T	T	G	T	T	-	G	T	T	T	T	T	T	G	T	T	G
Bn-A01-p20866022	A/G/-	A01	17675721	+	NA	NA	NA	NA	NA	NA	A	A	A	G	A	A	G	A	A	A	G	A	G	A	A	A	A	A	A	A	A	A	A	A	A	A	A	A	A	A	A	A	A	A	A	A	A	A	A
Bn-scaff_16534_2-p307964	A/C/-	A01	17683515	+	NA	NA	NA	NA	NA	NA	C	C	C	C	C	C	C	A	C	C	C	A	C	C	A	C	M	C	M	A	A	C	C	C	C	C	C	A	C	C	A	C	C	C	A	C	C	A	C
Bn-A01-p20890858	T/G/-	A01	17693741	+	NA	NA	NA	NA	NA	NA	T	T	T	G	G	T	G	-	T	G	G	T	G	G	T	G	G	G	-	T	G	G	G	G	T	G	G	-	T	G	T	G	G	G	T	T	G	T	T
Bn-A01-p20988977	A/G/-	A01	17794338	+	NA	NA	NA	NA	NA	NA	G	G	G	A	R	G	R	A	G	G	R	G	A	G	G	G	A	G	G	G	R	R	R	R	G	G	G	A	G	G	A	A	A	R	G	G	G	G	G
Bn-A01-p20990218	T/C/-	A01	17795583	+	NA	NA	NA	NA	NA	NA	C	C	C	T	T	C	T	T	C	T	T	T	T	T	T	T	T	T	C	T	T	T	T	T	C	T	T	T	C	T	T	T	T	T	T	C	T	T	C
Bn-A01-p21141514	T/G/-	A01	17820642	+	NA	NA	NA	NA	NA	NA	T	T	G	G	G	T	G	G	T	T	G	T	G	T	T	T	K	T	G	G	G	G	G	T	T	T	T	G	T	T	G	G	T	T	T	T	T	T	T
Bn-A01-p21309566	T/C/-	A01	17922735	+	NA	NA	NA	NA	NA	NA	C	C	T	T	T	C	T	C	C	C	T	C	T	C	C	C	-	C	C	T	C	T	T	T	C	C	C	C	C	C	C	C	C	T	C	C	C	C	C
Bn-A01-p21430708	A/G/-	A01	18057587	+	NA	NA	NA	NA	NA	NA	G	G	A	G	A	G	A	G	G	A	A	G	A	A	A	A	R	A	A	A	G	A	A	A	A	A	A	G	G	A	A	A	A	A	A	G	A	A	G
Bn-scaff_17036_1-p94786	T/C/-	A01	18058342	+	NA	NA	NA	NA	NA	NA	C	C	T	T	T	C	T	C	C	T	T	T	T	T	T	T	Y	T	T	T	C	T	T	T	T	T	T	C	C	T	T	T	T	T	T	C	T	T	C
Bn-A01-p21473161	A/C/-	A01	18103656	+	NA	NA	NA	NA	NA	NA	C	C	A	A	A	C	A	C	C	A	A	A	A	A	A	C	M	A	A	A	C	A	A	A	C	C	C	C	C	A	A	A	A	A	A	C	C	A	C
Bn-A01-p21479969	A/G/-	A01	18110870	+	NA	NA	NA	NA	NA	NA	A	A	A	A	A	A	A	A	A	A	A	A	A	A	A	A	A	A	A	A	A	A	A	A	A	A	A	A	A	A	G	G	A	A	A	A	A	A	A
Bn-A01-p21484088	A/G/-	A01	18114985	+	NA	NA	NA	NA	NA	NA	G	G	G	A	G	G	G	G	G	G	G	G	G	G	G	G	G	G	G	G	G	G	G	G	G	G	G	G	G	G	A	A	G	G	G	G	G	G	G
Bn-A01-p21500509	A/G/-	A01	18125374	+	NA	NA	NA	NA	NA	NA	A	A	A	A	A	A	A	A	A	A	A	A	A	A	A	A	A	A	A	A	A	A	A	A	A	A	A	A	A	A	G	G	A	A	A	A	A	A	A
Bn-A01-p21512663	A/G/-	A01	18130323	+	NA	NA	NA	NA	NA	NA	A	A	A	A	A	A	A	A	A	A	A	A	A	A	A	A	A	A	A	A	A	A	A	A	A	A	A	A	A	A	G	G	A	A	A	A	A	A	A
Bn-A01-p21517353	A/G/-	A01	18131006	+	NA	NA	NA	NA	NA	NA	G	G	G	G	G	G	G	G	G	G	G	G	G	G	G	G	G	G	G	G	G	G	G	G	G	G	G	G	G	G	A	A	G	G	G	G	G	G	G
Bn-A01-p21524150	T/G/-	A01	18138306	+	NA	NA	NA	NA	NA	NA	G	G	G	G	G	G	G	G	G	G	G	G	G	G	G	G	G	G	G	G	G	G	G	G	G	G	G	G	G	G	T	T	G	G	G	G	G	G	G
Bn-A01-p21527187	T/C/-	A01	18141319	+	NA	NA	NA	NA	NA	NA	C	C	T	T	T	C	T	T	C	T	T	T	T	T	T	C	T	T	T	T	T	T	T	T	C	C	C	T	C	T	T	T	T	T	T	C	C	T	C
Bn-A01-p21532512	A/C/-	A01	18144224	+	NA	NA	NA	NA	NA	NA	A	A	C	C	C	A	C	C	A	C	C	C	C	C	C	A	C	C	C	C	C	C	C	C	A	A	A	C	A	C	C	C	C	C	C	A	A	C	A
Bn-A01-p21634646	A/G/-	A01	18221986	+	NA	NA	NA	NA	NA	NA	G	G	G	G	G	G	G	G	G	A	G	G	G	A	-	G	G	G	A	R	G	G	G	G	G	G	G	-	G	A	G	G	-	G	A	G	G	G	G
Bn-A01-p21651835	T/C/-	A01	18237974	+	NA	NA	NA	NA	NA	NA	T	T	T	T	T	T	C	C	T	T	C	T	C	T	C	T	C	C	T	C	C	T	T	C	T	T	T	C	T	T	C	C	T	C	T	T	T	C	T
Bn-A01-p21663900	A/C/-	A01	18248427	+	NA	NA	NA	NA	NA	NA	C	C	C	C	C	C	C	C	C	C	C	C	C	C	C	C	C	C	C	C	C	C	C	C	C	C	C	C	C	C	A	A	C	C	C	C	C	C	C
Bn-A01-p21715162	T/C/-	A01	18303706	+	NA	NA	NA	NA	NA	NA	T	T	C	T	C	T	T	T	T	C	T	C	T	C	T	T	T	T	C	T	T	C	C	T	T	T	T	T	T	C	C	C	C	T	C	T	T	T	T
Bn-A01-p21758046	T/C/-	A01	18351464	+	NA	NA	NA	NA	NA	NA	T	T	T	T	T	T	T	T	T	T	T	T	T	T	C	T	T	T	T	T	T	T	T	T	T	T	T	T	T	T	T	T	T	T	C	T	T	T	T
Bn-A01-p21776155	T/G/-	A01	18386235	+	NA	NA	NA	NA	NA	NA	T	T	T	T	T	T	T	T	T	T	T	T	T	T	G	T	T	T	T	T	T	T	T	T	T	T	T	T	T	T	T	T	T	T	G	T	T	T	T
Bn-A01-p21846342	T/C/-	A01	18427009	+	NA	NA	NA	NA	NA	NA	T	T	C	T	C	T	T	T	T	C	T	C	T	C	T	T	T	T	C	T	T	C	C	T	T	T	T	T	T	C	C	C	T	T	T	T	T	T	T
Bn-A01-p21855770	T/C/-	A01	18441171	+	NA	NA	NA	NA	NA	NA	T	T	C	T	C	T	T	T	T	C	T	C	T	C	T	T	T	T	C	T	T	C	C	T	T	T	T	T	T	C	C	C	T	T	T	T	T	T	T
Bn-A01-p21856899	T/C/-	A01	18442344	+	NA	NA	NA	NA	NA	NA	C	C	T	C	T	C	C	C	C	T	C	T	C	T	C	C	C	C	T	C	C	T	T	C	C	C	C	C	C	T	T	T	C	C	C	C	C	C	C
Bn-A01-p21860162	A/C/-	A01	18450411	+	NA	NA	NA	NA	NA	NA	C	C	C	C	C	C	C	C	C	C	C	C	C	C	C	C	C	C	C	C	C	C	C	C	C	C	C	C	C	C	C	C	C	C	C	C	C	C	C
Bn-A01-p21869384	A/G/-	A01	18457520	+	NA	NA	NA	NA	NA	NA	A	A	A	A	A	A	A	A	A	A	A	A	A	A	A	A	A	A	A	A	A	A	A	A	A	A	A	A	A	A	A	A	A	A	A	A	A	A	A
Bn-Scaffold010152-p149	A/G/-	A01	18491434	+	NA	NA	NA	NA	NA	NA	G	G	G	G	G	G	G	G	G	G	G	G	G	G	G	G	G	G	G	G	G	G	G	G	G	G	G	G	G	G	G	-	G	G	G	G	G	-	G
Bn-scaff_20773_1-p332944	T/C/-	A01	18520282	+	NA	NA	NA	NA	NA	NA	T	T	C	C	T	C	T	T	C	C	T	C	T	T	-	T	T	C	T	T	T	T	T	T	T	T	T	C	T	T	T	T	T	T	T	T	T	T	T
Bn-A01-p21923141	A/G/-	A01	18533732	+	NA	NA	NA	NA	NA	NA	A	A	G	A	G	A	G	G	A	G	G	G	G	G	A	A	G	G	G	G	G	G	G	G	A	A	A	G	A	G	G	G	G	G	A	A	A	G	A
Bn-A01-p21926431	A/G/-	A01	18535156	+	NA	NA	NA	NA	NA	NA	A	A	G	A	G	A	G	G	A	G	G	G	G	G	A	A	G	G	G	G	G	G	G	G	A	A	A	G	A	G	G	G	G	G	A	A	A	G	A
Bn-A01-p21928497	T/C/-	A01	18537219	+	NA	NA	NA	NA	NA	NA	T	T	C	T	C	T	C	C	T	C	C	C	C	C	T	T	C	C	C	C	C	C	C	C	T	T	T	C	T	C	C	C	C	C	T	T	T	C	T
Bn-A01-p21930931	T/C/-	A01	18539653	+	NA	NA	NA	NA	NA	NA	C	C	C	C	C	C	C	C	C	C	C	C	C	C	C	C	C	C	C	C	C	C	C	C	C	C	C	C	C	C	C	C	C	C	C	C	C	C	C
Bn-A01-p21931622	T/C/-	A01	18540344	+	NA	NA	NA	NA	NA	NA	C	C	C	C	C	C	C	C	C	C	C	C	C	C	C	C	C	C	C	C	C	C	C	C	C	C	C	C	C	C	C	C	C	C	C	C	C	C	C
Bn-A01-p21969405	A/G/-	A01	18579415	+	NA	NA	NA	NA	NA	NA	G	G	A	G	A	G	A	A	G	A	A	A	A	A	G	G	A	A	A	A	A	A	A	A	G	G	G	A	G	A	A	A	A	A	G	G	G	A	G
Bn-A01-p22014179	A/G/-	A01	18643379	+	NA	NA	NA	NA	NA	NA	G	G	G	G	G	G	G	G	G	G	R	G	G	G	G	G	G	G	G	G	G	G	G	G	G	G	G	G	G	G	G	G	G	G	G	G	G	G	G
Bn-A01-p22014707	A/G/-	A01	18643906	+	NA	NA	NA	NA	NA	NA	A	-	A	A	A	A	A	A	A	A	A	A	A	A	A	A	A	A	A	A	A	A	A	A	A	A	A	A	A	A	-	A	A	A	A	A	A	-	A
Bn-A01-p22018616	T/C/-	A01	18649378	+	NA	NA	NA	NA	NA	NA	T	T	T	T	T	T	T	T	T	C	T	T	T	C	T	T	T	T	T	T	T	T	T	T	T	T	T	T	T	C	T	C	T	T	T	T	T	T	T
Bn-scaff_15844_1-p163992	A/G/-	A01	18759222	+	NA	NA	NA	NA	NA	NA	A	A	G	A	G	A	G	G	A	G	G	G	A	G	G	A	G	G	G	G	G	G	G	G	A	A	A	G	A	G	G	G	G	G	G	A	A	G	A
Bn-Scaffold016308-p77	T/C/-	A01	18761147	+	NA	NA	NA	NA	NA	NA	C	C	T	C	T	C	T	T	C	C	T	T	T	C	T	C	T	T	T	T	T	T	T	T	C	C	C	T	C	C	T	T	T	T	T	C	C	T	C
Bn-A01-p22681496	T/C/-	A01	18831032	+	NA	NA	NA	NA	NA	NA	T	T	T	T	T	T	T	T	T	C	T	T	C	C	T	T	T	T	T	T	T	T	T	T	T	T	T	T	T	C	T	T	T	T	T	T	T	T	T
Bn-A01-p22685756	T/C/-	A01	18835321	+	NA	NA	NA	NA	NA	NA	T	T	T	T	T	T	T	T	T	C	T	T	C	C	T	T	T	T	T	T	T	T	T	T	T	T	T	T	T	C	T	T	T	T	T	T	T	T	T
Bn-A01-p22741943	T/C/-	A01	18901219	+	NA	NA	NA	NA	NA	NA	C	C	C	C	C	C	C	C	C	C	C	C	C	C	C	C	C	C	C	C	C	C	C	C	C	C	C	C	C	C	C	C	C	C	C	C	C	C	C
Bn-A01-p22743403	T/C/-	A01	18902679	+	NA	NA	NA	NA	NA	NA	T	T	T	T	T	T	T	T	T	T	T	T	T	T	T	T	T	T	T	T	T	T	T	T	T	T	T	T	T	T	T	T	T	T	T	T	T	T	T
Bn-A01-p23175111	A/G/-	A01	19022504	+	NA	NA	NA	NA	NA	NA	A	A	G	A	G	A	A	G	A	G	G	G	G	G	G	A	G	G	G	G	G	G	G	G	G	A	A	G	A	G	G	A	G	G	A	A	A	A	A
Bn-A01-p23280094	A/G/-	A01	19145650	+	NA	NA	NA	NA	NA	NA	A	A	A	A	A	A	A	A	A	A	A	A	A	A	A	A	A	A	A	A	A	A	A	A	A	A	A	A	A	A	A	A	A	A	A	A	A	A	A
Bn-A01-p23330944	T/C/-	A01	19203801	+	NA	NA	NA	NA	NA	NA	T	T	T	T	T	T	T	T	T	T	T	T	T	T	T	T	T	T	T	T	T	T	T	T	T	T	T	T	T	T	Y	T	T	T	T	T	T	T	T
Bn-A01-p23370802	T/C/-	A01	19243847	+	NA	NA	NA	NA	NA	NA	C	C	C	C	C	C	C	C	C	C	C	C	T	C	C	C	C	C	C	C	C	C	C	C	C	C	C	C	C	C	C	C	C	C	C	C	C	C	C
Bn-A01-p23473514	A/C/-	A01	19347317	+	NA	NA	NA	NA	NA	NA	A	A	A	A	A	A	A	A	A	A	A	A	C	A	A	A	A	A	A	A	A	A	A	A	A	A	A	A	A	A	A	A	A	A	A	A	A	A	A
Bn-A01-p23477194	T/C/-	A01	19350103	+	NA	NA	NA	NA	NA	NA	T	T	T	T	T	T	T	T	T	T	T	T	C	T	T	T	T	T	T	T	T	T	T	T	T	T	T	T	T	T	T	T	T	T	T	T	T	T	T
Bn-A01-p23479473	T/G/-	A01	19352382	+	NA	NA	NA	NA	NA	NA	G	G	G	G	G	G	G	G	G	G	G	G	G	G	G	G	G	G	G	G	G	G	G	G	G	G	G	G	G	G	G	G	G	G	G	G	G	G	G
Bn-A01-p23493920	T/C/-	A01	19366797	+	NA	NA	NA	NA	NA	NA	T	T	T	T	T	T	T	T	T	T	T	T	C	T	T	T	T	T	T	T	T	T	T	T	T	T	T	T	T	T	T	T	T	T	T	T	T	T	T
Bn-A01-p22948925	A/G/-	A01	19438918	+	NA	NA	NA	NA	NA	NA	A	A	A	A	A	A	G	A	A	A	A	A	G	A	A	A	A	A	A	A	A	A	A	A	A	A	A	A	A	A	A	A	A	A	A	A	A	A	A
Bn-A01-p22949106	T/C/-	A01	19439099	+	NA	NA	NA	NA	NA	NA	C	C	C	C	C	C	T	C	C	C	C	C	T	C	C	C	C	C	C	C	C	C	C	C	C	C	C	C	C	C	C	C	C	C	C	C	C	C	C
Bn-A01-p22999151	T/C/-	A01	19494342	+	NA	NA	NA	NA	NA	NA	C	C	T	C	T	C	C	C	C	C	T	T	C	C	T	C	Y	T	T	T	C	T	T	T	C	C	C	C	C	C	T	C	T	T	T	C	C	T	C
Bn-A01-p23020726	A/G/-	A01	19513183	+	NA	NA	NA	NA	NA	NA	A	A	G	A	G	A	A	A	A	A	G	G	G	A	G	A	R	G	G	G	A	G	G	G	A	A	A	A	A	A	G	A	G	G	G	A	A	G	A
Bn-A06-p9371495	A/G/-	A01	19610932	+	NA	NA	NA	NA	NA	NA	G	G	G	G	G	G	G	G	G	G	G	G	G	G	G	G	G	G	G	G	G	G	G	G	G	G	G	G	G	G	G	G	G	G	G	G	G	G	G
Bn-A01-p23614887	A/G/-	A01	19663723	+	NA	NA	NA	NA	NA	NA	A	A	A	A	A	A	A	A	A	A	A	A	G	A	A	A	A	A	A	A	A	A	A	A	A	A	A	A	A	A	A	A	A	A	A	A	A	A	A
Bn-A01-p23638107	T/C/-	A01	19687984	+	NA	NA	NA	NA	NA	NA	T	T	C	T	C	T	C	T	T	C	C	C	T	C	C	T	Y	C	C	C	T	C	C	C	C	T	T	T	T	C	C	T	C	C	C	T	T	T	T
Bn-A01-p23640103	A/G/-	A01	19689928	+	NA	NA	NA	NA	NA	NA	G	G	G	G	G	G	G	G	G	G	G	G	G	G	G	G	G	G	G	G	G	G	G	G	G	G	G	G	G	G	G	G	G	G	G	G	G	G	G
Bn-A01-p23658023	T/C/-	A01	19704657	+	NA	NA	NA	NA	NA	NA	C	C	T	C	T	C	T	T	C	T	T	T	T	T	T	C	T	T	T	T	T	T	T	T	T	C	C	T	C	T	T	C	T	T	T	C	C	C	C
Bn-A01-p23672301	T/C/-	A01	19724991	+	NA	NA	NA	NA	NA	NA	Y	Y	Y	Y	Y	C	Y	Y	Y	Y	Y	Y	Y	Y	Y	Y	Y	Y	Y	Y	Y	Y	Y	Y	Y	Y	C	Y	Y	Y	Y	C	Y	Y	Y	Y	Y	Y	C
Bn-A01-p23685466	A/C/-	A01	19738170	+	NA	NA	NA	NA	NA	NA	A	A	A	A	A	A	A	A	A	A	A	A	A	C	A	A	A	A	A	A	A	A	A	A	A	A	A	A	A	A	A	A	A	A	A	A	A	A	A
Bn-A01-p23730610	A/G/-	A01	19782923	+	NA	NA	NA	NA	NA	NA	G	G	A	G	A	G	A	A	G	A	A	A	A	A	A	G	A	A	A	A	A	A	A	A	A	G	G	A	G	A	A	G	A	A	A	G	G	G	G
Bn-A01-p23763782	T/C/-	A01	19825340	+	NA	NA	NA	NA	NA	NA	Y	Y	T	C	Y	C	T	Y	C	Y	T	Y	T	Y	Y	Y	Y	C	T	T	Y	Y	Y	Y	Y	Y	Y	Y	Y	Y	Y	C	T	Y	Y	Y	Y	Y	Y
Bn-A01-p23873720	T/G/-	A01	19936465	+	NA	NA	NA	NA	NA	NA	G	G	G	T	G	G	G	T	G	G	G	G	G	G	G	G	K	G	G	G	T	G	G	G	G	G	G	T	G	G	G	G	G	G	G	G	G	G	G
Bn-A01-p23965220	T/C/-	A01	20014955	+	NA	NA	NA	NA	NA	NA	T	T	T	T	T	T	T	T	T	T	T	T	T	T	T	T	T	T	T	T	T	T	T	T	T	T	T	T	T	T	T	T	T	T	T	T	T	T	T
Bn-A01-p23905191	A/G/-	A01	20068468	+	NA	NA	NA	NA	NA	NA	A	A	G	A	G	A	A	A	A	G	G	A	A	G	G	A	R	G	G	G	A	G	G	G	G	A	A	A	A	G	A	A	G	G	G	A	A	A	A
Bn-A01-p24369455	T/C/-	A01	20147090	+	NA	NA	NA	NA	NA	NA	T	T	T	T	C	T	C	T	T	T	T	C	C	T	C	T	Y	C	C	T	T	C	C	C	T	T	T	T	T	T	C	T	C	C	T	T	T	T	T
Bn-A07-p18922121	T/C/-	A01	20148728	+	NA	NA	NA	NA	NA	NA	T	T	T	T	T	T	T	T	T	T	T	T	T	T	T	T	T	T	T	T	T	T	T	T	T	T	T	T	T	T	T	T	T	T	T	T	T	T	T
Bn-A01-p24390991	T/G/-	A01	20186023	+	NA	NA	NA	NA	NA	NA	G	G	T	G	T	G	T	G	G	T	T	T	G	T	T	G	-	T	T	T	G	T	T	T	T	G	G	G	G	T	T	G	T	T	T	G	G	G	G
Bn-A01-p24394537	A/C/-	A01	20189590	+	NA	NA	NA	NA	NA	NA	A	A	C	C	A	A	A	C	C	C	C	A	C	C	C	A	M	A	A	C	C	A	A	A	C	A	A	C	A	C	M	A	A	A	C	A	A	A	A
Bn-A01-p24396906	A/G/-	A01	20191020	+	NA	NA	NA	NA	NA	NA	A	A	G	G	A	A	A	G	R	G	G	A	A	G	A	A	R	A	A	G	G	A	A	A	G	A	A	G	A	G	A	A	A	A	G	A	A	A	A
Bn-A01-p24408637	T/C/-	A01	20206623	+	NA	NA	NA	NA	NA	NA	C	C	T	T	C	C	C	T	Y	T	T	C	C	T	C	C	Y	C	C	T	T	C	C	C	T	C	C	T	C	T	C	C	C	C	T	C	C	C	C
Bn-A01-p24416660	T/C/-	A01	20214742	+	NA	NA	NA	NA	NA	NA	C	C	T	T	C	C	C	T	Y	C	T	C	T	C	C	C	-	C	C	T	T	C	C	C	C	C	C	T	C	C	C	C	C	C	T	C	C	C	C
Bn-A01-p24507466	A/G/-	A01	20311700	+	NA	NA	NA	NA	NA	NA	G	G	A	A	G	G	A	A	R	G	A	A	G	G	A	G	A	A	A	A	A	A	G	A	G	G	G	A	G	G	A	G	A	A	A	G	G	G	G
Bn-A01-p24526982	T/G/-	A01	20332036	+	NA	NA	NA	NA	NA	NA	T	T	G	G	T	T	G	G	-	T	G	T	T	T	G	T	G	T	T	G	G	T	T	T	T	T	T	G	T	T	T	T	T	T	T	T	T	T	T
Bn-A01-p24575577	T/C/-	A01	20378108	+	NA	NA	NA	NA	NA	NA	T	T	T	T	T	T	C	T	T	C	T	C	T	C	T	T	Y	C	C	T	T	C	T	C	C	T	T	T	T	C	C	T	C	C	C	T	T	T	T
Bn-scaff_16534_1-p2419545	T/C/-	A01	20462697	+	NA	NA	NA	NA	NA	NA	T	T	C	C	C	T	C	C	Y	T	C	C	C	T	C	T	Y	T	C	C	C	T	C	T	T	T	T	C	T	T	C	T	T	T	C	T	T	T	T
Bn-A01-p24707425	T/C/-	A01	20475601	+	NA	NA	NA	NA	NA	NA	T	T	T	C	T	T	C	T	Y	C	T	T	C	T	T	T	Y	T	T	T	C	Y	T	-	C	T	T	Y	T	-	T	T	C	T	T	T	T	T	T
Bn-A01-p24840306	T/C/-	A01	20572032	+	NA	NA	NA	NA	NA	NA	T	T	T	T	T	T	C	T	T	C	T	T	T	T	T	T	Y	T	T	T	T	C	T	C	T	T	T	T	T	T	T	-	T	T	T	T	T	-	T
Bn-A01-p24848629	A/C/-	A01	20581194	+	NA	NA	NA	NA	NA	NA	A	A	C	C	M	A	C	A	M	C	A	C	C	A	A	A	C	C	A	C	C	C	A	C	C	A	A	C	A	C	C	A	A	C	A	A	A	A	A
Bn-Scaffold000164-p174512	A/G/-	A01	20676904	+	NA	NA	NA	NA	NA	NA	A	A	G	G	G	A	A	A	G	A	G	G	G	G	A	A	G	G	G	G	G	A	G	A	A	A	A	G	A	A	G	A	G	A	G	A	A	A	A
Bn-Scaffold000164-p120459	T/G/-	A01	20722328	+	NA	NA	NA	NA	NA	NA	T	T	G	T	G	T	T	T	T	G	T	T	G	T	G	T	K	G	G	G	T	G	G	G	T	T	T	T	T	T	G	T	T	T	T	T	T	T	T
Bn-A01-p26423587	A/G/-	A01	20942371	+	NA	NA	NA	NA	NA	NA	A	A	G	G	G	A	A	G	R	A	G	G	G	G	G	A	G	A	G	G	G	G	G	G	G	A	A	G	A	G	G	A	G	G	A	A	A	A	A
Bn-A01-p26425810	A/C/-	A01	20944411	+	NA	NA	NA	NA	NA	NA	C	C	A	A	A	C	C	A	M	C	A	A	A	A	A	C	A	C	A	A	A	A	A	A	A	C	C	A	C	A	A	C	A	A	C	C	C	C	C
Bn-scaff_21884_1-p720411	T/C/-	A01	21006223	+	NA	NA	NA	NA	NA	NA	T	T	C	T	C	T	T	C	T	T	C	C	C	C	C	T	T	C	C	C	T	C	C	C	C	T	T	T	T	C	C	T	C	C	T	T	T	T	T
Bn-A01-p26518304	A/G/-	A01	21042682	+	NA	NA	NA	NA	NA	NA	A	A	A	A	A	A	A	A	A	A	A	A	A	A	A	A	A	A	A	A	A	A	A	A	A	A	A	A	A	A	A	A	A	A	A	A	A	A	A
Bn-scaff_21884_1-p768055	A/G/-	A01	21043482	+	NA	NA	NA	NA	NA	NA	G	G	G	G	G	G	G	G	G	G	G	G	G	G	G	G	G	G	G	G	G	G	G	G	G	G	G	G	G	G	G	G	G	G	G	G	G	G	G
Bn-scaff_15712_3-p804356	A/C/-	A01	21417036	+	NA	NA	NA	NA	NA	NA	C	C	C	C	C	C	A	C	C	C	C	C	C	C	C	C	C	C	C	A	C	A	C	C	C	C	C	C	A	C	C	C	C	A	C	C	C	C	C
Bn-A01-p27360503	A/G/-	A01	21484318	+	NA	NA	NA	NA	NA	NA	G	G	G	G	G	G	G	G	G	G	G	G	G	G	A	G	G	A	G	G	G	G	G	G	G	G	G	G	G	G	G	G	G	G	-	G	G	G	G
Bn-A01-p27722989	T/C/-	A01	21730692	+	NA	NA	NA	NA	NA	NA	T	T	T	T	T	T	T	T	T	T	C	T	C	T	T	T	T	T	T	T	T	T	T	T	T	T	T	T	T	T	T	T	T	T	T	T	T	T	T
Bn-A01-p27954294	A/C/-	A01	21800106	+	NA	NA	NA	NA	NA	NA	A	A	A	A	C	-	C	A	A	C	C	-	C	C	M	A	M	A	A	C	A	A	C	A	-	-	M	C	A	A	C	M	C	A	-	A	A	C	C
Bn-A01-p27989439	T/G/-	A01	21843466	+	NA	NA	NA	NA	NA	NA	T	T	T	T	T	T	T	T	T	T	T	T	G	T	T	T	T	T	T	G	T	T	T	T	T	T	T	T	T	T	T	T	T	T	T	T	T	T	T
Bn-A01-p28161207	T/C/-	A01	22162781	+	NA	NA	NA	NA	NA	NA	C	C	C	C	C	C	C	C	C	C	C	C	T	C	C	C	C	C	C	T	C	C	C	C	C	C	C	C	C	C	C	C	C	C	C	C	C	C	C
Bn-A01-p25235998	T/C/-	A01	22206203	+	NA	NA	NA	NA	NA	NA	C	Y	T	T	T	T	T	C	T	T	T	T	T	T	T	C	T	T	T	T	T	C	T	C	C	T	C	T	C	T	T	C	T	T	T	C	C	T	C
Bn-A01-p28360889	A/C/-	A01	22615340	+	NA	NA	NA	NA	NA	NA	A	A	-	A	A	A	C	A	A	C	C	A	A	A	C	A	A	C	A	C	A	A	A	A	A	A	A	A	A	A	C	A	C	A	C	A	A	C	A
Bn-A01-p28380414	T/C/-	A01	22637962	+	NA	NA	NA	NA	NA	NA	C	C	-	C	T	C	T	T	T	C	T	T	T	T	T	C	T	T	T	T	T	T	T	T	C	C	C	T	C	T	T	C	T	T	C	C	C	T	T
Bn-A01-p28426820	T/C/-	A01	22710053	+	NA	NA	NA	NA	NA	NA	C	C	C	C	C	C	C	T	T	C	C	T	T	T	T	C	T	C	C	C	T	T	C	T	C	C	C	C	C	C	C	C	T	C	C	C	C	T	C
Bn-A01-p28497362	A/G/-	A01	22790563	+	NA	NA	NA	NA	NA	NA	G	G	-	A	A	G	G	A	A	A	G	A	A	A	A	G	A	G	G	A	A	A	A	A	G	G	G	A	G	G	G	A	A	G	G	G	G	R	A
Bn-A01-p28497900	A/G/-	A01	22791098	+	NA	NA	NA	NA	NA	NA	A	A	G	G	G	A	A	G	G	G	A	G	G	G	G	A	G	A	A	G	G	G	G	G	A	A	A	G	A	A	A	G	G	A	A	A	A	A	G
Bn-A02-p2923889	T/C/-	A02	24828	+	NA	NA	NA	NA	NA	NA	T	T	T	T	T	T	T	T	T	T	T	T	T	T	T	C	T	T	T	T	T	T	T	T	T	T	T	T	T	T	T	T	T	T	T	T	T	T	T
Bn-A02-p1337706	A/G/-	A02	40455	+	NA	NA	NA	NA	NA	NA	G	G	G	G	G	G	G	G	G	G	G	A	G	G	G	G	G	G	G	A	G	G	G	G	G	G	G	G	G	G	G	G	A	G	G	G	G	G	G
Bn-A02-p1327787	A/G/-	A02	56770	+	NA	NA	NA	NA	NA	NA	A	A	A	A	A	A	A	A	A	A	A	A	A	A	A	A	A	A	A	G	A	A	A	A	A	A	A	A	A	A	A	A	A	A	A	A	A	A	A
Bn-A02-p1326013	T/G/-	A02	58490	+	NA	NA	NA	NA	NA	NA	T	T	T	T	T	T	T	T	T	T	T	T	T	T	T	T	T	T	T	G	T	T	T	T	T	T	T	T	T	T	T	T	T	T	T	T	T	T	T
Bn-A02-p1325213	T/G/-	A02	59290	+	NA	NA	NA	NA	NA	NA	G	G	G	K	K	G	G	K	K	K	G	K	K	K	K	G	K	G	K	T	K	K	G	K	G	G	G	K	G	K	G	K	K	K	K	K	G	K	G
Bn-scaff_15714_1-p2723978	T/C/-	A02	87358	+	NA	NA	NA	NA	NA	NA	C	C	T	T	T	T	T	T	T	T	C	C	T	C	T	T	T	T	T	T	T	T	T	C	C	C	C	T	C	C	T	C	C	C	T	C	C	T	C
Bn-A02-p1290847	T/G/-	A02	87694	+	NA	NA	NA	NA	NA	NA	G	G	T	T	T	T	T	T	T	T	G	G	T	G	T	T	T	T	T	T	T	T	T	G	G	G	G	T	G	G	T	G	G	G	T	G	G	T	G
Bn-A02-p1265949	A/G/-	A02	113939	+	NA	NA	NA	NA	NA	NA	G	G	G	G	G	G	G	G	G	G	G	A	G	G	G	G	G	G	G	G	G	G	G	G	G	G	G	G	G	G	G	G	G	G	G	G	G	G	G
Bn-A02-p1264906	A/C/-	A02	114981	+	NA	NA	NA	NA	NA	NA	A	A	A	A	A	A	A	A	A	A	A	C	A	A	A	A	A	A	A	A	A	A	A	A	A	A	A	A	A	A	A	A	A	A	A	A	A	A	A
Bn-A02-p6658392	T/C/-	A02	115494	+	NA	NA	NA	NA	NA	NA	C	C	C	C	C	C	C	C	C	C	C	C	C	C	C	T	C	T	C	C	C	T	C	C	C	C	C	C	C	C	C	-	C	C	C	C	C	-	C
Bn-A02-p1259929	T/C/-	A02	120960	+	NA	NA	NA	NA	NA	NA	T	T	T	T	C	T	C	C	T	C	C	C	C	T	C	Y	C	T	T	C	C	C	C	T	T	T	T	C	T	T	C	T	C	T	C	T	T	C	T
Bn-A02-p6689427	T/G/-	A02	141243	+	NA	NA	NA	NA	NA	NA	G	G	G	G	G	G	G	G	G	G	G	G	G	G	G	T	G	T	G	G	G	G	G	G	G	G	G	G	G	G	G	G	G	G	G	G	G	G	G
Bn-A02-p1232964	A/G/-	A02	147990	+	NA	NA	NA	NA	NA	NA	G	G	A	A	A	A	A	A	A	A	A	A	A	G	A	A	A	A	G	A	A	G	A	G	G	G	G	A	G	G	A	G	A	G	A	G	G	A	G
Bn-A02-p1188292	T/C/-	A02	180695	+	NA	NA	NA	NA	NA	NA	C	Y	T	T	C	T	Y	C	T	C	C	C	-	C	C	Y	C	T	C	C	C	C	C	C	C	C	C	C	C	C	C	C	C	C	C	C	C	C	C
Bn-A02-p6766615	A/G/-	A02	204182	+	NA	NA	NA	NA	NA	NA	A	A	A	A	A	A	A	A	A	-	A	A	A	A	A	G	A	G	A	A	A	G	A	A	A	A	A	A	A	A	A	A	A	A	A	A	A	A	A
Bn-scaff_15714_1-p2567188	A/G/-	A02	217776	+	NA	NA	NA	NA	NA	NA	A	A	A	A	A	A	A	A	A	A	A	A	A	A	A	G	A	A	A	A	A	A	A	A	A	A	A	A	A	A	A	A	A	A	A	A	A	A	A
Bn-A02-p1135078	A/G/-	A02	234868	+	NA	NA	NA	NA	NA	NA	A	A	A	A	A	A	A	A	A	A	A	A	A	A	A	A	A	A	A	A	A	A	A	A	A	A	A	A	A	A	A	A	A	A	A	A	A	A	A
Bn-A02-p6995796	T/C/-	A02	246689	+	NA	NA	NA	NA	NA	NA	C	C	C	C	C	C	C	C	C	C	C	C	C	C	C	C	C	C	C	T	C	C	C	C	C	C	C	C	C	C	C	C	C	C	C	C	C	C	C
Bn-A02-p7363071	A/C/-	A02	258691	+	NA	NA	NA	NA	NA	NA	C	C	C	C	C	C	C	C	C	A	C	C	C	C	C	C	C	C	C	C	C	C	C	C	C	C	C	C	C	C	C	C	C	C	-	C	C	C	C
Bn-A02-p1096082	T/C/-	A02	258885	+	NA	NA	NA	NA	NA	NA	C	C	C	C	C	C	C	C	C	C	C	C	C	C	C	C	C	C	C	C	C	C	C	C	C	C	C	C	C	C	C	C	C	C	C	C	C	C	C
Bn-A02-p1092146	T/C/-	A02	262823	+	NA	NA	NA	NA	NA	NA	T	T	T	T	T	T	T	C	T	T	T	T	T	T	T	T	T	T	T	T	T	T	T	T	T	T	T	T	T	T	T	T	T	T	T	T	T	T	T
Bn-A02-p7351746	A/C/-	A02	269936	+	NA	NA	NA	NA	NA	NA	A	A	A	A	A	A	A	A	A	C	A	A	A	A	A	A	A	A	A	A	A	A	A	A	A	A	A	A	A	A	A	A	A	A	A	A	A	A	A
Bn-A02-p7350064	A/G/-	A02	271618	+	NA	NA	NA	NA	NA	NA	G	G	G	G	G	G	G	G	G	R	G	G	G	G	G	G	G	G	G	G	G	G	G	G	G	G	G	G	G	G	G	G	G	G	G	G	G	G	G
Bn-A02-p7853194	T/C/-	A02	282574	+	NA	NA	NA	NA	NA	NA	T	T	C	C	T	T	C	T	T	Y	C	T	C	T	T	C	C	C	T	C	C	T	C	T	C	C	C	Y	C	T	C	C	T	T	C	T	C	C	C
Bn-scaff_15714_1-p2368497	T/C/-	A02	342337	+	NA	NA	NA	NA	NA	NA	C	C	C	C	C	C	C	C	C	C	C	C	C	C	C	T	C	C	C	C	C	C	C	C	C	C	C	C	C	C	C	C	C	C	C	C	C	C	C
Bn-A02-p12157799	A/G/-	A02	374460	+	NA	NA	NA	NA	NA	NA	A	A	G	G	G	G	G	A	G	R	G	A	G	A	G	A	G	G	A	G	G	A	G	A	A	A	A	G	A	A	G	G	A	A	G	A	A	G	G
Bn-A02-p12597733	A/G/-	A02	376932	+	NA	NA	NA	NA	NA	NA	A	A	A	A	G	G	A	A	G	R	A	A	A	A	A	A	A	G	A	A	A	A	A	A	A	A	A	-	A	A	A	-	A	A	A	A	A	-	G
Bn-A02-p2867545	T/G/-	A02	415097	+	NA	NA	NA	NA	NA	NA	T	T	T	T	T	T	T	T	T	G	T	T	T	T	T	-	T	T	T	T	T	T	T	T	T	T	T	T	T	T	T	T	T	T	T	T	T	T	T
Bn-A02-p3011103	T/G/-	A02	485659	+	NA	NA	NA	NA	NA	NA	T	T	T	T	T	T	T	T	T	G	T	T	T	T	T	G	T	T	T	T	T	T	T	T	T	T	T	T	T	T	T	T	T	T	T	T	T	T	T
Bn-A02-p3033620	A/G/-	A02	508891	+	NA	NA	NA	NA	NA	NA	A	A	A	A	A	A	A	A	A	A	A	A	A	A	A	A	A	A	A	A	A	A	A	A	A	A	A	A	A	A	A	A	A	A	A	A	A	A	A
Bn-A02-p3074016	T/G/-	A02	552308	+	NA	NA	NA	NA	NA	NA	G	G	G	-	G	G	G	G	G	G	G	G	G	G	G	G	G	G	G	G	T	G	G	G	G	G	G	G	G	G	G	-	G	G	G	G	G	G	G
Bn-A02-p11713324	A/G/-	A02	552502	+	NA	NA	NA	NA	NA	NA	A	A	A	A	G	G	A	A	G	R	A	A	A	A	A	A	A	G	A	A	A	A	A	A	A	A	A	A	A	A	A	A	A	A	A	A	A	A	G
Bn-A02-p3080150	A/G/-	A02	558462	+	NA	NA	NA	NA	NA	NA	A	A	A	A	A	A	A	A	A	G	A	A	A	A	A	G	A	A	A	R	A	A	A	A	A	A	A	A	A	A	-	A	-	A	A	A	A	A	A
Bn-A02-p13124058	T/C/-	A02	571039	+	NA	NA	NA	NA	NA	NA	C	C	T	C	T	C	T	C	C	T	T	C	T	C	T	C	T	C	C	T	T	C	T	C	Y	T	C	C	T	C	C	C	C	C	T	C	C	T	C
Bn-A02-p13067449	T/C/-	A02	573460	+	NA	NA	NA	NA	NA	NA	T	T	C	C	T	-	C	T	T	C	C	-	C	T	C	T	C	T	T	C	C	T	C	T	T	C	-	C	C	T	C	C	T	T	C	T	T	C	-
Bn-A02-p13068355	T/C/-	A02	574015	+	NA	NA	NA	NA	NA	NA	C	C	T	T	C	C	T	C	C	T	T	C	T	C	T	C	T	C	C	T	T	C	T	C	C	T	C	T	T	C	T	-	C	C	T	C	C	T	C
Bn-scaff_15714_1-p1934829	A/G/-	A02	605672	+	NA	NA	NA	NA	NA	NA	A	A	A	A	A	A	A	A	A	A	A	A	A	A	A	A	A	A	A	A	A	A	A	A	A	A	A	A	A	A	A	A	A	A	A	A	A	A	A
Bn-A02-p3121742	T/C/-	A02	605811	+	NA	NA	NA	NA	NA	NA	T	T	T	T	T	T	T	T	T	T	T	T	T	T	T	C	T	T	T	T	T	T	T	T	T	T	T	T	T	T	T	T	T	T	T	T	T	T	T
Bn-A02-p13662225	A/G/-	A02	645506	+	NA	NA	NA	NA	NA	NA	G	G	A	G	A	G	A	G	G	A	A	G	A	G	A	G	A	G	G	A	A	G	A	G	R	A	G	G	A	G	A	G	G	G	A	G	G	A	G
Bn-A02-p3167622	T/C/-	A02	651222	+	NA	NA	NA	NA	NA	NA	T	T	T	T	T	T	T	T	T	C	T	T	T	T	T	C	T	T	T	T	T	T	T	T	T	T	T	T	T	T	T	T	T	T	T	T	T	T	T
Bn-A02-p3181443	A/G/-	A02	667828	+	NA	NA	NA	NA	NA	NA	G	G	G	G	G	G	G	G	G	A	G	G	G	G	G	G	G	G	G	G	G	G	G	G	G	G	G	G	G	G	G	G	G	G	G	G	G	G	G
Bn-A02-p3214903	T/C/-	A02	709680	+	NA	NA	NA	NA	NA	NA	C	C	C	C	C	C	C	C	C	T	C	C	C	C	C	C	C	C	C	C	C	C	C	C	C	C	C	C	C	C	C	C	C	C	C	C	C	C	C
Bn-A02-p3233816	T/C/-	A02	729679	+	NA	NA	NA	NA	NA	NA	T	T	T	T	T	T	T	T	T	C	T	T	T	T	T	T	T	T	T	T	T	T	T	T	T	T	T	T	T	T	T	T	T	T	T	T	T	T	T
Bn-A02-p3281338	T/G/-	A02	764105	+	NA	NA	NA	NA	NA	NA	G	G	G	G	G	G	G	G	G	T	G	G	G	G	G	G	G	G	G	G	G	G	G	G	G	G	G	G	G	G	G	G	G	G	G	G	G	G	G
Bn-A02-p3295898	T/G/-	A02	786193	+	NA	NA	NA	NA	NA	NA	T	T	T	T	T	T	T	T	T	G	T	T	T	T	T	T	T	T	T	T	T	T	T	T	T	T	T	T	T	T	T	T	T	T	T	T	T	T	T
Bn-A02-p3299206	A/G/-	A02	789246	+	NA	NA	NA	NA	NA	NA	A	A	A	A	A	A	A	A	A	G	A	A	A	A	A	A	A	A	A	A	A	A	A	A	A	A	A	A	A	A	A	A	A	A	A	A	A	A	A
Bn-A02-p15637932	T/C/-	A02	800459	+	NA	NA	NA	NA	NA	NA	T	T	C	C	C	C	C	T	-	C	C	T	C	T	C	T	C	C	T	C	C	T	C	T	T	C	T	T	C	T	C	C	T	T	C	T	T	C	C
Bn-A02-p3344176	A/G/-	A02	834150	+	NA	NA	NA	NA	NA	NA	G	G	G	G	G	G	G	G	G	A	G	G	G	G	G	R	G	G	G	G	G	G	G	G	G	G	G	G	G	G	G	G	G	G	G	G	G	G	G
Bn-A02-p15745628	A/G/-	A02	836901	+	NA	NA	NA	NA	NA	NA	G	G	A	A	A	A	A	G	-	A	A	G	A	G	A	G	A	A	G	A	A	G	A	G	G	A	G	G	A	G	A	A	G	G	A	G	G	A	A
Bn-A02-p3349026	T/C/-	A02	839267	+	NA	NA	NA	NA	NA	NA	T	T	T	T	T	T	T	T	T	C	T	T	T	T	T	Y	T	T	T	T	T	T	T	T	T	T	T	T	T	T	T	T	T	T	T	T	T	T	T
Bn-A02-p3374678	T/C/-	A02	863953	+	NA	NA	NA	NA	NA	NA	C	C	C	C	C	C	C	C	C	C	C	C	C	C	C	C	C	C	C	C	C	C	C	C	C	C	C	C	C	C	C	C	C	C	C	C	C	C	C
Bn-A02-p3398506	T/C/-	A02	891094	+	NA	NA	NA	NA	NA	NA	T	T	T	T	T	T	T	T	T	C	T	T	T	T	T	T	T	T	T	T	T	T	T	T	T	T	T	T	T	T	T	T	T	T	T	T	T	T	T
Bn-A02-p3422005	T/C/-	A02	911462	+	NA	NA	NA	NA	NA	NA	T	T	C	Y	C	C	T	T	C	T	T	T	T	T	T	T	T	C	T	T	T	T	C	T	T	T	T	T	T	T	T	T	T	T	T	T	T	T	T
Bn-A02-p3423823	T/C/-	A02	913182	+	NA	NA	NA	NA	NA	NA	C	C	C	C	C	C	C	C	C	T	C	C	C	C	C	Y	C	C	C	C	C	C	C	C	C	C	C	C	C	C	C	C	C	C	C	C	C	C	C
Bn-A02-p3446017	A/G/-	A02	931441	+	NA	NA	NA	NA	NA	NA	A	A	A	A	A	A	A	A	A	G	A	A	A	A	A	R	A	A	A	A	A	A	A	A	A	A	A	A	A	A	A	-	A	A	A	A	A	-	A
Bn-A02-p16209439	T/G/-	A02	960462	+	NA	NA	NA	NA	NA	NA	G	G	T	T	G	T	T	G	K	T	T	G	T	G	G	G	G	T	G	T	T	G	G	G	G	G	G	G	T	G	T	T	G	G	K	G	G	T	T
Bn-A02-p16220163	A/G/-	A02	978250	+	NA	NA	NA	NA	NA	NA	A	A	G	G	A	G	A	A	G	G	G	A	G	A	R	A	A	G	A	G	G	A	A	A	A	A	A	A	G	A	G	G	A	A	G	A	A	G	G
Bn-A02-p3543810	T/C/-	A02	978818	+	NA	NA	NA	NA	NA	NA	T	T	T	T	T	T	T	T	T	C	T	T	T	T	T	Y	T	T	T	T	T	T	T	T	T	T	T	T	T	T	T	T	T	T	T	T	T	T	T
Bn-A02-p3558502	T/G/-	A02	993808	+	NA	NA	NA	NA	NA	NA	G	G	G	G	G	G	G	G	G	T	G	G	G	G	G	K	G	G	G	G	G	G	G	G	G	G	G	G	G	G	G	G	G	G	G	G	G	G	G
Bn-A05-p9226284	A/G/-	A02	995823	+	NA	NA	NA	NA	NA	NA	A	A	G	G	A	G	A	A	-	G	G	A	G	A	R	A	A	G	A	G	G	A	A	A	A	A	A	A	G	A	G	G	A	A	G	A	A	G	G
Bn-A02-p3571230	A/G/-	A02	1007316	+	NA	NA	NA	NA	NA	NA	G	G	G	G	G	G	G	G	G	G	G	G	G	G	G	G	G	G	G	G	G	G	G	G	G	G	G	G	G	G	G	G	G	G	G	G	G	G	G
Bn-A02-p3606635	T/C/-	A02	1041673	+	NA	NA	NA	NA	NA	NA	T	T	T	T	T	T	C	T	T	C	C	T	C	T	T	C	T	T	T	C	T	T	T	T	T	T	T	T	T	T	C	T	T	T	C	T	T	T	T
Bn-A02-p3633790	T/C/-	A02	1069095	+	NA	NA	NA	NA	NA	NA	C	C	C	Y	T	T	T	C	T	T	T	C	T	C	C	Y	C	T	C	T	C	C	T	C	C	C	C	C	C	C	T	C	C	C	T	C	C	C	C
Bn-A02-p3656969	T/G/-	A02	1092724	+	NA	NA	NA	NA	NA	NA	T	T	T	G	G	G	T	T	G	G	T	T	G	T	T	-	T	G	T	T	T	T	G	T	T	T	-	-	T	T	T	-	T	T	T	T	T	-	-
Bn-A02-p3717426	T/C/-	A02	1142526	+	NA	NA	NA	NA	NA	NA	C	C	C	Y	T	T	C	C	T	T	C	C	T	C	C	Y	C	T	C	C	C	C	T	C	C	C	C	C	C	C	C	C	C	C	C	C	C	C	C
Bn-A02-p3718340	T/G/-	A02	1143504	+	NA	NA	NA	NA	NA	NA	T	T	T	K	G	G	T	T	G	G	T	T	G	T	T	T	T	G	T	T	T	T	G	T	T	T	T	T	T	T	T	T	T	T	T	T	T	T	T
Bn-A02-p3728882	A/C/-	A02	1154084	+	NA	NA	NA	NA	NA	NA	C	C	C	M	A	A	C	A	A	A	C	C	A	C	C	M	C	A	C	C	C	C	A	C	C	C	C	C	C	C	C	C	C	C	C	C	C	C	C
Bn-A02-p3759462	A/G/-	A02	1182064	+	NA	NA	NA	NA	NA	NA	A	A	A	R	G	G	A	G	G	G	A	A	A	A	A	G	A	G	A	A	G	A	G	A	A	A	A	A	A	A	A	A	A	A	A	A	A	A	A
Bn-A02-p3803198	A/G/-	A02	1223592	+	NA	NA	NA	NA	NA	NA	A	A	A	-	G	G	A	A	G	G	A	A	A	A	-	R	A	G	A	A	A	A	G	A	A	A	-	-	A	A	A	-	A	A	A	A	A	-	-
Bn-A02-p3822985	T/C/-	A02	1243417	+	NA	NA	NA	NA	NA	NA	T	T	T	T	T	T	C	C	T	T	T	T	C	T	C	Y	C	T	T	C	C	T	T	C	T	T	T	C	T	T	C	T	C	T	C	T	T	T	T
Bn-A02-p3934729	T/C/-	A02	1340392	+	NA	NA	NA	NA	NA	NA	C	C	C	C	C	C	T	T	C	C	C	C	T	C	T	Y	Y	C	C	T	T	C	C	T	C	C	C	C	C	C	T	C	T	C	T	C	C	C	C
Bn-A02-p3965286	A/G/-	A02	1363002	+	NA	NA	NA	NA	NA	NA	A	A	A	A	A	A	G	A	A	A	A	A	G	A	G	-	R	A	A	G	G	A	A	G	A	A	A	G	A	A	G	A	G	A	G	A	A	G	A
Bn-A02-p4035808	A/G/-	A02	1427784	+	NA	NA	NA	NA	NA	NA	G	G	G	G	G	G	G	G	G	G	G	G	G	G	G	G	G	G	G	G	G	G	G	G	G	G	G	G	G	G	G	G	G	G	G	G	G	G	G
Bn-A02-p4037028	T/G/-	A02	1429004	+	NA	NA	NA	NA	NA	NA	T	T	T	T	T	T	T	T	T	T	T	T	T	T	T	T	T	T	T	T	T	T	T	T	T	T	T	T	T	T	T	T	T	T	T	T	T	T	T
Bn-A02-p4038224	T/C/-	A02	1430200	+	NA	NA	NA	NA	NA	NA	C	C	C	C	C	C	C	C	C	C	C	C	C	C	C	C	C	C	C	C	C	C	C	C	C	C	C	C	C	C	C	C	C	C	C	C	C	C	C
Bn-A02-p20200723	T/G/-	A02	1460804	+	NA	NA	NA	NA	NA	NA	G	G	G	G	G	G	G	G	G	G	G	G	G	G	G	G	G	G	G	G	G	G	G	G	G	G	G	G	G	G	G	G	G	G	G	G	G	G	G
Bn-A02-p4104054	T/C/-	A02	1481263	+	NA	NA	NA	NA	NA	NA	T	T	T	T	T	T	T	T	T	T	T	T	T	T	T	Y	T	T	T	T	T	T	T	T	T	T	T	T	T	T	T	T	T	T	T	T	T	T	T
Bn-A02-p20166067	A/C/-	A02	1490008	+	NA	NA	NA	NA	NA	NA	C	C	C	C	C	C	C	C	C	C	C	C	C	C	C	C	C	C	C	C	C	C	C	C	C	C	C	C	C	C	C	C	C	C	C	C	C	C	C
Bn-A02-p4110757	A/G/-	A02	1492196	+	NA	NA	NA	NA	NA	NA	A	A	A	G	G	G	A	G	G	A	A	A	A	A	A	A	R	G	A	A	A	A	G	A	A	A	A	A	A	A	A	A	A	A	A	A	A	A	A
Bn-A02-p20158101	T/C/-	A02	1499238	+	NA	NA	NA	NA	NA	NA	T	T	T	T	T	T	T	T	T	T	T	T	T	T	T	T	T	T	T	T	T	T	T	T	T	T	T	T	T	T	T	T	T	T	T	T	T	T	T
Bn-A02-p20157985	T/C/-	A02	1499354	+	NA	NA	NA	NA	NA	NA	C	C	C	C	C	C	C	C	C	C	C	C	C	C	C	C	C	C	C	C	C	C	C	C	C	C	C	C	C	C	C	C	C	C	C	C	C	C	C
Bn-scaff_15712_6-p1029382	T/C/-	A02	1519630	+	NA	NA	NA	NA	NA	NA	C	C	C	C	C	C	C	C	C	C	C	C	C	C	C	C	C	C	C	C	C	C	C	C	C	C	C	C	C	C	C	C	C	C	C	C	C	C	C
Bn-A02-p25457843	T/C/-	A02	1542435	+	NA	NA	NA	NA	NA	NA	T	T	T	T	C	T	C	T	T	Y	T	T	C	T	Y	C	T	T	T	T	T	T	T	T	T	T	T	T	T	T	T	T	T	T	T	T	T	C	C
Bn-A02-p25456985	A/G/-	A02	1543293	+	NA	NA	NA	NA	NA	NA	G	G	G	G	A	G	A	G	G	R	G	G	A	G	R	A	G	G	G	G	G	G	G	G	G	G	G	G	G	G	G	G	G	G	G	G	G	A	A
Bn-A02-p25454242	A/G/-	A02	1546315	+	NA	NA	NA	NA	NA	NA	G	G	G	G	A	G	A	G	G	R	G	G	A	G	G	A	G	G	G	G	G	G	G	G	G	G	G	G	G	G	G	G	G	G	G	G	G	A	A
Bn-A02-p4201122	T/C/-	A02	1576900	+	NA	NA	NA	NA	NA	NA	T	T	T	Y	C	C	T	C	C	T	T	T	T	T	T	Y	T	C	T	C	T	T	C	T	T	T	T	T	T	T	T	T	C	T	T	T	T	C	T
Bn-A02-p4210188	A/G/-	A02	1585369	+	NA	NA	NA	NA	NA	NA	A	A	A	R	G	G	A	G	G	A	A	A	A	A	A	A	A	G	A	G	A	A	G	A	A	A	A	A	A	A	A	A	G	A	A	A	A	G	A
Bn-A02-p4220181	T/G/-	A02	1597354	+	NA	NA	NA	NA	NA	NA	T	T	T	T	T	T	T	T	T	G	T	T	T	T	T	T	T	T	T	T	T	T	T	T	T	T	T	T	T	T	T	T	T	T	T	T	T	T	T
Bn-A02-p4237047	T/C/-	A02	1607529	+	NA	NA	NA	NA	NA	NA	Y	T	C	T	C	C	T	C	T	T	C	T	T	C	Y	C	T	T	T	T	T	T	T	T	C	C	C	T	T	C	T	T	T	T	T	C	C	T	C
Bn-A02-p25402971	A/G/-	A02	1617112	+	NA	NA	NA	NA	NA	NA	A	A	A	A	G	A	A	A	A	R	A	A	G	A	R	G	A	A	A	A	A	A	A	A	A	A	A	A	A	A	A	A	A	A	A	A	A	G	G
Bn-A02-p4345046	A/G/-	A02	1722398	+	NA	NA	NA	NA	NA	NA	A	A	A	A	A	A	A	A	A	A	A	A	A	A	A	A	A	A	A	A	A	A	A	A	A	A	A	A	A	A	A	A	A	A	A	A	A	A	A
Bn-A02-p4352396	A/C/-	A02	1729368	+	NA	NA	NA	NA	NA	NA	A	A	A	M	C	C	A	A	C	A	A	A	A	A	A	A	A	C	A	A	A	A	C	A	A	A	A	A	A	A	A	A	A	A	A	A	A	A	A
Bn-A02-p4761483	A/G/-	A02	1887996	+	NA	NA	NA	NA	NA	NA	A	A	A	A	G	G	G	G	G	A	A	A	G	A	A	A	-	A	A	A	A	A	G	G	A	A	A	G	G	A	G	A	A	A	G	A	A	G	A
Bn-A02-p4774095	A/C/-	A02	1896455	+	NA	NA	NA	NA	NA	NA	A	A	A	A	C	C	C	C	C	A	A	A	C	A	A	A	M	A	A	A	A	A	C	C	A	A	A	C	C	A	C	A	A	A	C	A	A	C	A
Bn-scaff_23176_1-p79652	A/C/-	A02	2197968	+	NA	NA	NA	NA	NA	NA	A	M	M	M	M	C	C	M	C	C	M	M	M	A	-	A	A	A	A	A	A	M	A	M	M	M	C	C	A	A	A	A	M	A	A	M	M	A	-
Bn-A02-p5201568	A/G/-	A02	2303232	+	NA	NA	NA	NA	NA	NA	G	G	G	G	G	A	A	-	A	A	-	-	R	G	G	A	G	A	G	G	G	G	G	-	G	G	G	A	G	-	G	A	G	G	G	G	G	G	G
Bn-A02-p5326222	T/C/-	A02	2446625	+	NA	NA	NA	NA	NA	NA	T	T	T	T	T	T	C	T	T	C	T	T	T	T	T	T	T	T	T	T	T	T	T	T	T	T	T	T	T	T	T	T	T	T	T	T	T	T	T
Bn-scaff_17522_1-p1607150	A/C/-	A02	2462957	+	NA	NA	NA	NA	NA	NA	A	A	A	A	A	A	C	A	A	A	C	A	C	A	A	C	A	A	A	C	A	A	A	A	A	A	A	A	A	A	C	C	-	A	C	A	A	C	A
Bn-A02-p5394958	T/C/-	A02	2505474	+	NA	NA	NA	NA	NA	NA	C	C	C	C	C	C	T	C	C	T	C	C	C	C	C	C	C	C	C	C	C	C	C	C	C	C	C	C	C	C	C	C	C	C	C	C	C	C	C
Bn-A02-p5501733	T/C/-	A02	2621499	+	NA	NA	NA	NA	NA	NA	C	C	C	C	C	C	C	C	C	C	C	C	C	C	C	T	C	C	C	C	C	C	C	C	C	C	C	C	C	C	C	C	C	C	C	C	C	C	C
Bn-A02-p5507193	T/C/-	A02	2627083	+	NA	NA	NA	NA	NA	NA	C	C	C	C	C	C	C	C	C	C	C	C	C	C	C	T	C	C	C	C	C	C	C	C	C	C	C	C	C	C	C	C	C	C	C	C	C	C	C
Bn-A02-p5516551	T/C/-	A02	2642352	+	NA	NA	NA	NA	NA	NA	T	T	T	T	T	T	T	T	T	T	T	T	T	T	T	C	T	T	T	T	T	T	T	T	T	T	T	T	T	T	T	T	T	T	T	T	T	T	T
Bn-A02-p5519417	T/C/-	A02	2645216	+	NA	NA	NA	NA	NA	NA	C	C	C	C	C	C	C	C	C	C	C	C	C	C	C	T	C	C	C	C	C	C	C	C	C	C	C	C	C	C	C	C	C	C	C	C	C	C	C
Bn-A02-p5541204	T/C/-	A02	2662343	+	NA	NA	NA	NA	NA	NA	C	C	C	C	C	C	C	C	C	C	C	C	C	C	C	T	C	C	C	C	C	C	C	C	C	C	C	C	C	C	C	C	C	C	C	C	C	C	C
Bn-A02-p5551332	T/C/-	A02	2670493	+	NA	NA	NA	NA	NA	NA	T	T	T	T	T	T	T	T	T	T	T	T	T	T	T	C	T	T	T	T	T	T	T	T	T	T	T	T	T	T	T	T	T	T	T	T	T	T	T
Bn-A02-p5553077	T/G/-	A02	2672239	+	NA	NA	NA	NA	NA	NA	G	G	G	G	G	G	G	G	G	G	G	G	G	G	G	T	G	G	G	G	G	G	G	G	G	G	G	G	G	G	G	G	G	G	G	G	G	G	G
Bn-A02-p5553663	A/G/-	A02	2672825	+	NA	NA	NA	NA	NA	NA	A	A	A	A	A	A	A	A	A	A	A	A	A	A	A	G	A	A	A	A	A	A	A	A	A	A	-	A	A	A	A	A	A	A	A	A	A	A	A
Bn-A02-p5570144	A/G/-	A02	2688485	+	NA	NA	NA	NA	NA	NA	G	G	G	G	G	G	G	G	G	G	G	G	G	G	G	A	G	G	G	G	G	G	G	G	G	G	G	G	G	G	G	G	G	G	G	G	G	G	G
Bn-A02-p5571981	T/C/-	A02	2690319	+	NA	NA	NA	NA	NA	NA	T	T	T	T	T	T	T	T	T	C	T	T	T	T	T	C	T	T	T	T	T	T	T	T	T	T	T	T	T	T	T	T	T	T	T	T	T	T	T
Bn-A02-p5574727	T/G/-	A02	2693065	+	NA	NA	NA	NA	NA	NA	T	T	T	T	T	T	T	T	T	T	T	T	T	T	T	T	T	T	T	T	T	T	T	T	T	T	T	T	T	T	T	T	T	T	T	T	T	T	T
Bn-A02-p5582861	A/C/-	A02	2712565	+	NA	NA	NA	NA	NA	NA	C	C	C	C	C	C	C	C	C	C	C	C	C	C	C	C	C	C	C	C	C	C	C	C	C	C	C	C	C	C	C	C	C	C	C	C	C	C	C
Bn-A02-p5601991	T/C/-	A02	2728256	+	NA	NA	NA	NA	NA	NA	T	T	T	T	T	T	T	T	T	T	T	T	T	T	T	C	T	C	T	T	T	T	T	T	T	T	T	T	T	T	T	T	T	T	T	T	T	T	T
Bn-A02-p5731499	A/G/-	A02	2878346	+	NA	NA	NA	NA	NA	NA	A	A	A	A	A	G	A	A	G	G	A	A	A	A	A	A	A	A	A	A	A	A	A	A	A	A	A	G	A	A	A	G	A	A	A	A	A	A	A
Bn-A02-p5799113	A/G/-	A02	2969755	+	NA	NA	NA	NA	NA	NA	A	A	A	A	-	-	A	A	-	G	A	A	A	A	A	G	A	G	A	A	A	A	A	A	A	A	A	-	A	A	A	G	A	A	A	A	A	A	A
Bn-A02-p5802612	T/C/-	A02	2974269	+	NA	NA	NA	NA	NA	NA	C	C	C	C	C	C	C	C	C	T	C	C	C	C	C	T	C	T	C	C	C	C	C	C	C	C	C	C	C	C	C	T	C	C	C	C	C	C	C
Bn-A02-p5803164	A/G/-	A02	2974821	+	NA	NA	NA	NA	NA	NA	A	A	A	A	A	A	A	A	A	G	A	A	A	A	A	G	A	G	A	A	A	A	A	A	A	A	A	A	A	A	A	G	A	A	A	A	A	A	A
Bn-A02-p5812506	A/C/-	A02	2983005	+	NA	NA	NA	NA	NA	NA	A	A	A	A	A	A	A	A	A	C	A	A	A	A	A	C	A	C	A	A	A	A	A	A	A	A	A	A	A	A	A	C	A	A	A	A	A	A	A
Bn-A02-p5859447	A/G/-	A02	3030378	+	NA	NA	NA	NA	NA	NA	A	A	A	A	G	G	A	A	G	A	A	A	A	A	A	G	A	G	A	A	A	A	A	A	A	A	A	G	A	A	A	A	A	A	A	A	A	A	A
Bn-scaff_17522_1-p481078	A/G/-	A02	3056889	+	NA	NA	NA	NA	NA	NA	G	G	G	G	G	G	G	G	G	G	G	G	G	G	G	-	G	G	G	G	G	G	G	G	G	G	G	G	G	G	A	A	G	G	A	G	G	A	G
Bn-A02-p5907701	A/G/-	A02	3096806	+	NA	NA	NA	NA	NA	NA	A	A	A	A	A	G	A	A	A	G	A	A	A	A	A	G	A	G	A	A	A	A	A	A	A	A	A	A	A	A	A	G	A	A	A	A	A	A	A
Bn-A02-p5925648	A/C/-	A02	3113306	+	NA	NA	NA	NA	NA	NA	C	C	C	C	A	A	C	C	A	A	C	C	C	C	C	C	C	C	C	C	C	C	C	C	C	C	C	A	C	C	C	A	C	C	C	C	C	C	C
Bn-A02-p5985314	T/C/-	A02	3197992	+	NA	NA	NA	NA	NA	NA	T	T	T	T	T	T	T	T	T	T	T	T	T	T	T	C	T	C	T	T	T	T	T	T	T	T	T	T	T	T	T	T	T	T	T	T	T	T	T
Bn-A02-p5985692	T/C/-	A02	3198367	+	NA	NA	NA	NA	NA	NA	T	T	T	T	T	T	T	T	T	T	T	T	T	T	T	C	T	C	T	T	T	T	T	T	T	T	T	T	T	T	T	T	T	T	T	T	T	T	T
Bn-A02-p6084757	A/G/-	A02	3274541	+	NA	NA	NA	NA	NA	NA	G	G	G	G	G	G	G	G	G	A	G	G	G	G	G	A	G	A	G	G	G	A	G	G	G	G	G	G	G	G	G	G	G	G	G	G	G	G	G
Bn-A02-p6097441	A/G/-	A02	3290349	+	NA	NA	NA	NA	NA	NA	A	A	A	A	A	A	A	A	A	G	A	A	A	A	A	G	A	G	A	A	A	G	A	A	A	A	A	A	A	A	A	A	A	A	A	A	A	A	A
Bn-A02-p6099790	A/G/-	A02	3292585	+	NA	NA	NA	NA	NA	NA	G	G	G	G	G	G	G	G	G	G	G	G	G	G	G	G	G	G	G	G	G	G	G	G	G	G	G	G	G	G	G	G	G	G	G	G	G	G	G
Bn-A02-p6147730	T/G/-	A02	3316152	+	NA	NA	NA	NA	NA	NA	G	G	G	G	G	G	G	G	G	G	G	G	G	G	G	T	G	T	G	G	G	G	G	G	G	G	G	G	G	G	G	G	G	G	G	G	G	G	G
Bn-A02-p6149358	A/G/-	A02	3317755	+	NA	NA	NA	NA	NA	NA	G	G	G	G	G	G	G	G	G	G	G	G	G	G	G	G	G	G	G	G	G	G	G	G	G	G	G	G	G	G	G	G	G	G	G	G	G	G	G
Bn-A02-p6164030	A/G/-	A02	3322588	+	NA	NA	NA	NA	NA	NA	G	G	G	G	G	G	G	G	G	G	G	G	G	G	G	G	G	G	G	G	G	G	G	G	G	G	G	G	G	G	G	G	G	G	G	G	G	G	G
Bn-A02-p6166043	T/G/-	A02	3330201	+	NA	NA	NA	NA	NA	NA	G	G	G	G	G	G	G	G	G	T	G	G	G	G	G	T	G	T	G	G	G	T	G	G	G	G	G	G	G	G	G	G	G	G	G	G	G	G	G
Bn-A02-p6167491	T/G/-	A02	3331734	+	NA	NA	NA	NA	NA	NA	G	G	G	G	G	G	G	G	G	G	G	G	G	G	G	G	G	G	G	G	G	G	G	G	G	G	G	G	G	G	G	G	G	G	G	G	G	G	G
Bn-A02-p6181965	T/C/-	A02	3349206	+	NA	NA	NA	NA	NA	NA	C	C	C	C	C	C	C	C	C	T	C	C	C	C	C	T	C	T	C	C	C	T	C	C	C	C	C	C	C	C	C	C	C	C	C	C	C	C	C
Bn-A02-p6202881	A/C/-	A02	3373200	+	NA	NA	NA	NA	NA	NA	C	C	C	C	C	C	C	C	C	A	C	C	C	C	C	A	C	A	C	C	C	A	C	C	C	C	C	C	C	C	C	C	C	C	C	C	C	C	C
Bn-A02-p6203059	A/G/-	A02	3373378	+	NA	NA	NA	NA	NA	NA	A	A	A	A	A	A	A	A	A	G	A	A	A	A	A	G	A	G	A	A	A	G	A	A	A	A	A	A	A	A	A	A	A	A	A	A	A	A	A
Bn-A02-p6206533	A/G/-	A02	3376403	+	NA	NA	NA	NA	NA	NA	A	A	A	A	A	A	A	A	A	G	A	A	A	A	A	G	A	G	A	A	A	G	A	A	A	A	A	-	A	A	A	-	A	A	A	A	A	-	A
Bn-A02-p6237474	A/C/-	A02	3407873	+	NA	NA	NA	NA	NA	NA	A	A	A	A	A	A	A	A	A	C	A	A	A	A	A	C	A	C	A	A	A	C	A	A	A	A	A	A	A	A	A	A	A	A	A	A	A	A	A
Bn-A02-p6267300	T/C/-	A02	3440595	+	NA	NA	NA	NA	NA	NA	T	T	T	T	T	T	T	T	T	C	T	T	T	T	T	C	T	C	T	T	T	C	T	T	T	T	T	T	T	T	T	T	T	T	T	T	T	T	T
Bn-A02-p6277812	A/G/-	A02	3451111	+	NA	NA	NA	NA	NA	NA	G	G	G	G	G	G	G	G	G	A	G	G	G	G	G	A	G	A	G	G	G	A	G	G	G	G	G	G	G	G	G	G	G	G	G	G	G	G	G
Bn-A02-p6315978	T/C/-	A02	3484553	+	NA	NA	NA	NA	NA	NA	C	C	C	C	C	C	C	C	C	T	C	C	C	C	C	C	C	C	C	C	C	T	C	C	C	C	C	C	C	C	C	C	C	C	C	C	C	C	C
Bn-A02-p6384663	T/G/-	A02	3572646	+	NA	NA	NA	NA	NA	NA	G	G	G	G	G	G	G	G	G	G	G	G	G	G	G	T	G	T	G	G	G	G	G	G	G	G	G	G	G	G	G	G	G	G	G	G	G	G	G
Bn-A02-p6391751	T/G/-	A02	3579819	+	NA	NA	NA	NA	NA	NA	T	T	T	T	T	T	T	T	T	T	T	T	T	T	T	T	T	T	T	T	T	T	T	T	T	T	T	T	T	T	T	T	T	T	T	T	T	T	T
Bn-A02-p6392450	T/C/-	A02	3580506	+	NA	NA	NA	NA	NA	NA	T	T	T	T	T	T	T	T	T	C	T	T	T	T	T	C	T	C	T	T	T	C	T	T	T	T	T	T	T	T	T	T	T	T	T	T	T	T	T
Bn-A02-p6399820	A/C/-	A02	3593395	+	NA	NA	NA	NA	NA	NA	C	C	C	C	C	C	C	C	C	A	C	C	C	C	C	C	C	C	C	C	C	A	C	C	C	C	C	C	C	C	C	C	C	C	C	C	C	C	C
Bn-scaff_16269_1-p329447	T/G/-	A02	3680191	+	NA	NA	NA	NA	NA	NA	T	T	T	K	T	T	T	G	T	G	T	T	T	T	T	T	T	T	T	T	G	T	T	T	T	T	T	T	T	T	T	T	T	T	T	T	T	T	T
Bn-A02-p6473898	T/G/-	A02	3687860	+	NA	NA	NA	NA	NA	NA	G	G	G	K	G	G	G	T	G	T	G	G	G	G	G	G	G	G	G	G	T	G	G	G	G	G	G	G	G	G	G	G	G	G	G	G	G	G	G
Bn-A02-p6476748	T/C/-	A02	3690613	+	NA	NA	NA	NA	NA	NA	C	C	C	-	C	C	C	T	C	T	C	C	C	C	C	C	C	C	C	C	T	C	C	C	C	C	C	C	C	C	C	C	C	C	C	C	C	C	C
Bn-A02-p6478309	T/C/-	A02	3692134	+	NA	NA	NA	NA	NA	NA	T	T	T	Y	T	T	T	C	T	C	T	T	T	T	T	C	T	C	T	T	C	T	T	T	T	T	T	T	T	T	T	T	T	T	T	T	T	T	T
Bn-scaff_16269_1-p296261	A/G/-	A02	3708393	+	NA	NA	NA	NA	NA	NA	A	A	A	G	A	A	A	A	A	G	A	A	A	A	A	A	A	A	A	A	A	A	A	A	A	A	A	A	A	A	G	-	A	A	A	A	A	A	A
Bn-scaff_16269_1-p242999	A/G/-	A02	3741098	+	NA	NA	NA	NA	NA	NA	G	G	G	G	G	G	G	G	G	G	G	G	G	G	G	A	G	A	G	G	G	G	G	G	G	G	G	G	G	G	G	-	G	G	G	G	G	G	G
Bn-A02-p6570881	A/G/-	A02	3792402	+	NA	NA	NA	NA	NA	NA	A	A	A	A	A	A	A	A	A	R	A	A	A	A	A	G	A	G	A	A	A	A	A	A	A	A	A	A	A	A	A	A	A	A	A	A	A	A	A
Bn-A02-p6816192	T/C/-	A02	3859491	+	NA	NA	NA	NA	NA	NA	T	Y	T	T	T	T	C	T	T	T	T	T	T	T	T	C	T	C	T	T	T	C	T	T	T	T	T	T	T	T	T	C	T	T	T	T	T	T	T
Bn-Scaffold009013-p209	T/C/-	A02	3862906	+	NA	NA	NA	NA	NA	NA	T	T	T	T	T	T	T	T	T	T	T	T	T	T	T	T	T	T	T	T	T	T	T	T	T	T	T	T	T	T	T	T	T	T	T	T	T	T	T
Bn-A02-p6852756	T/C/-	A02	3894723	+	NA	NA	NA	NA	NA	NA	C	C	C	C	C	C	C	C	C	C	C	C	C	C	C	C	C	C	C	C	C	T	C	C	C	C	C	C	C	C	C	C	C	C	C	C	C	C	C
Bn-A02-p6859259	A/G/-	A02	3901227	+	NA	NA	NA	NA	NA	NA	G	G	G	-	G	G	A	G	G	R	G	G	G	G	G	A	G	A	G	G	G	A	G	G	G	G	G	G	G	G	G	A	G	G	G	G	G	G	G
Bn-A02-p6868939	T/C/-	A02	3910050	+	NA	NA	NA	NA	NA	NA	C	C	C	C	C	C	C	C	C	C	C	C	C	C	C	C	C	C	C	C	C	C	C	C	C	C	C	C	C	C	C	C	C	C	C	C	C	C	C
Bn-A02-p7012860	A/G/-	A02	4047981	+	NA	NA	NA	NA	NA	NA	G	G	G	G	A	A	G	G	A	G	G	G	G	G	G	A	G	A	G	G	G	G	G	G	G	G	G	A	G	G	G	G	G	G	G	G	G	-	G
Bn-A02-p7043311	A/C/-	A02	4079677	+	NA	NA	NA	NA	NA	NA	C	C	C	C	A	A	C	C	A	M	C	C	C	C	C	A	C	A	C	A	C	C	C	C	C	C	C	A	C	C	C	C	C	C	C	C	C	C	C
Bn-A02-p7043901	A/G/-	A02	4080264	+	NA	NA	NA	NA	NA	NA	A	A	A	A	A	A	A	A	A	A	A	A	A	A	A	A	A	A	A	A	A	A	A	A	A	A	A	A	A	A	A	A	A	A	A	A	A	A	A
Bn-A02-p7056194	T/C/-	A02	4094997	+	NA	NA	NA	NA	NA	NA	T	T	T	T	C	C	T	T	C	T	T	T	T	T	T	C	T	C	T	T	T	T	T	T	T	T	T	C	T	T	T	T	T	T	T	T	T	T	T
Bn-scaff_16804_1-p653237	T/C/-	A02	4131944	+	NA	NA	NA	NA	NA	NA	T	Y	-	C	T	-	-	T	T	C	C	T	T	-	Y	C	T	T	T	T	-	C	T	Y	T	T	T	C	T	T	C	C	Y	-	T	T	T	T	T
Bn-A02-p7139447	A/G/-	A02	4184887	+	NA	NA	NA	NA	NA	NA	G	G	G	G	G	G	G	G	G	G	G	G	G	G	G	A	G	A	G	G	G	G	G	G	G	G	G	G	G	G	G	G	G	G	G	G	G	G	G
Bn-A02-p7243236	T/C/-	A02	4292850	+	NA	NA	NA	NA	NA	NA	C	C	C	C	C	C	C	C	C	T	C	C	C	C	C	T	C	T	C	C	C	C	C	C	C	C	C	C	C	C	C	C	C	C	C	C	C	C	C
Bn-A02-p7245763	A/C/-	A02	4297505	+	NA	NA	NA	NA	NA	NA	C	C	C	C	C	C	C	C	C	A	C	C	C	C	C	A	C	A	C	C	C	C	C	C	C	C	C	C	C	C	C	C	C	C	C	C	C	C	C
Bn-A02-p7260946	T/C/-	A02	4316762	+	NA	NA	NA	NA	NA	NA	C	C	C	C	C	C	C	C	C	T	C	C	C	C	C	T	C	T	C	C	C	C	C	C	C	C	C	C	C	C	C	C	C	C	C	C	C	C	C
Bn-scaff_18514_1-p128629	A/G/-	A02	4324859	+	NA	NA	NA	NA	NA	NA	G	G	G	G	G	G	G	G	G	A	G	G	G	G	G	A	G	A	G	G	G	G	G	G	G	G	G	G	G	G	G	G	G	G	G	G	G	G	G
Bn-A02-p7306278	A/G/-	A02	4358595	+	NA	NA	NA	NA	NA	NA	A	A	A	A	A	A	A	A	A	G	A	A	A	A	A	A	A	A	A	A	A	A	A	A	A	A	A	A	A	A	A	A	A	A	A	A	A	A	A
Bn-A02-p7396082	T/G/-	A02	4418694	+	NA	NA	NA	NA	NA	NA	G	G	G	G	G	G	G	G	G	T	G	G	G	G	G	T	G	T	G	G	G	G	G	G	G	G	G	G	G	G	G	G	G	G	G	G	G	G	G
Bn-A02-p7396400	A/C/-	A02	4418976	+	NA	NA	NA	NA	NA	NA	A	A	A	A	A	A	A	A	A	C	A	A	A	A	A	A	A	A	A	A	A	A	A	A	A	A	A	A	A	A	A	A	A	A	A	A	A	A	A
Bn-scaff_15712_13-p63324	T/C/-	A02	4500718	+	NA	NA	NA	NA	NA	NA	T	T	T	T	T	T	T	T	T	T	T	T	T	T	T	-	T	T	T	T	T	T	T	T	T	T	T	C	T	T	T	T	T	T	T	T	T	T	T
Bn-A02-p7482915	T/G/-	A02	4511692	+	NA	NA	NA	NA	NA	NA	T	T	T	G	T	T	G	T	T	T	T	T	T	T	T	T	G	-	T	G	T	T	G	T	T	T	T	T	T	T	G	G	T	T	G	T	T	G	T
Bn-A02-p7483107	T/C/-	A02	4511884	+	NA	NA	NA	NA	NA	NA	T	T	T	C	T	T	C	T	T	-	T	T	T	T	T	C	C	-	T	C	T	T	C	T	T	T	T	T	T	T	C	C	T	T	C	T	T	C	T
Bn-A02-p7575736	A/C/-	A02	4597430	+	NA	NA	NA	NA	NA	NA	A	A	C	C	A	-	C	A	A	C	C	A	C	A	A	M	C	C	C	C	A	C	C	C	C	C	C	A	C	A	C	C	A	A	A	A	C	C	C
Bn-A02-p7595911	A/C/-	A02	4616972	+	NA	NA	NA	NA	NA	NA	C	C	A	A	C	C	A	C	C	A	A	C	A	C	C	M	A	A	A	A	C	A	A	A	A	A	A	C	A	C	A	A	C	C	C	C	A	A	A
Bn-A02-p7597314	A/G/-	A02	4618427	+	NA	NA	NA	NA	NA	NA	G	G	A	A	G	G	A	G	G	A	A	G	A	G	G	R	A	A	A	A	G	A	A	A	A	A	A	G	A	G	A	A	G	G	G	G	A	A	A
Bn-A02-p7675505	A/G/-	A02	4692156	+	NA	NA	NA	NA	NA	NA	R	G	G	-	G	G	G	-	A	G	G	A	G	R	R	A	G	A	G	G	G	G	G	G	G	G	G	G	G	R	-	-	A	A	G	G	G	G	G
Bn-A02-p7896923	A/G/-	A02	4882955	+	NA	NA	NA	NA	NA	NA	A	A	G	G	G	G	G	A	A	R	G	A	G	A	A	G	G	G	A	G	G	A	G	A	G	G	G	G	G	A	G	G	A	A	G	A	G	G	G
Bn-scaff_15712_5-p201534	T/C/-	A02	4907117	+	NA	NA	NA	NA	NA	NA	C	C	C	T	C	C	C	C	C	T	C	-	C	C	T	C	C	C	C	C	C	C	C	C	C	C	C	T	C	C	T	T	C	C	C	C	C	C	C
Bn-scaff_15712_5-p318116	T/C/-	A02	4939074	+	NA	NA	NA	NA	NA	NA	Y	Y	C	T	C	-	C	Y	Y	T	C	Y	C	Y	T	C	Y	C	Y	C	C	Y	Y	Y	C	C	C	T	C	Y	T	T	Y	Y	C	Y	C	-	C
Bn-A02-p7958421	A/C/-	A02	4940609	+	NA	NA	NA	NA	NA	NA	C	C	C	C	A	A	C	C	C	C	C	C	C	C	C	A	C	A	C	C	C	C	C	C	C	C	C	M	C	C	C	C	C	C	C	C	C	C	C
Bn-A02-p7975165	T/G/-	A02	4957081	+	NA	NA	NA	NA	NA	NA	T	T	G	G	T	T	G	T	T	K	G	T	G	T	T	T	T	T	T	G	G	T	T	T	G	G	G	K	G	T	G	G	T	T	G	T	G	T	G
Bn-A02-p7976278	T/C/-	A02	4958194	+	NA	NA	NA	NA	NA	NA	C	C	C	C	C	C	C	C	C	Y	C	C	C	C	C	C	C	C	C	C	C	C	C	C	C	C	C	C	C	C	C	C	C	C	C	C	C	C	C
Bn-A02-p8024157	A/G/-	A02	5008644	+	NA	NA	NA	NA	NA	NA	G	G	G	G	A	A	G	G	G	-	G	G	G	G	G	A	G	A	G	G	G	G	G	G	G	G	G	G	G	G	G	G	G	G	G	G	G	G	G
Bn-A02-p8057234	A/G/-	A02	5042256	+	NA	NA	NA	NA	NA	NA	A	A	G	G	A	A	G	-	A	-	G	A	G	A	A	G	A	G	A	G	G	A	A	A	G	G	G	G	G	A	G	G	A	A	G	A	G	A	G
Bn-A02-p8169424	A/G/-	A02	5160109	+	NA	NA	NA	NA	NA	NA	A	A	A	A	A	A	A	A	A	R	A	A	A	A	A	G	A	G	A	A	A	A	A	A	A	A	A	A	A	A	A	A	A	A	A	A	A	A	A
Bn-A02-p8177809	T/C/-	A02	5168980	+	NA	NA	NA	NA	NA	NA	C	C	C	C	T	T	C	C	C	-	C	C	C	C	C	T	C	T	C	C	C	C	C	C	C	C	C	C	C	C	C	C	C	C	C	C	C	C	C
Bn-A02-p8200381	T/G/-	A02	5191829	+	NA	NA	NA	NA	NA	NA	T	T	T	T	G	G	T	T	T	K	T	-	T	T	T	G	T	G	T	T	T	T	T	T	T	T	-	-	T	T	G	T	T	T	T	T	T	T	-
Bn-scaff_17725_1-p103504	T/C/-	A02	5223410	+	NA	NA	NA	NA	NA	NA	T	T	T	C	T	T	T	T	T	C	T	T	T	T	T	C	T	T	T	T	T	T	T	T	T	T	T	T	T	T	C	C	T	T	T	T	T	T	T
Bn-A02-p8277939	T/C/-	A02	5250664	+	NA	NA	NA	NA	NA	NA	C	C	C	C	C	C	C	C	C	C	C	C	C	C	C	T	C	T	C	C	C	C	C	C	C	C	C	C	C	C	T	C	C	C	C	C	C	C	C
Bn-A02-p8285151	T/C/-	A02	5257855	+	NA	NA	NA	NA	NA	NA	C	C	T	T	T	T	T	C	C	T	T	C	T	C	C	T	T	T	C	T	T	C	T	C	T	T	T	T	T	C	C	T	C	C	T	C	T	T	T
Bn-A02-p8313782	A/G/-	A02	5280749	+	NA	NA	NA	NA	NA	NA	G	G	G	G	G	G	G	G	G	R	G	G	G	G	G	A	A	A	G	G	G	G	A	G	G	G	G	G	G	G	A	G	G	G	G	G	G	A	G
Bn-A02-p8324359	A/G/-	A02	5288530	+	NA	NA	NA	NA	NA	NA	A	A	A	A	A	A	A	A	A	R	A	A	A	A	A	G	G	G	A	A	A	A	G	A	A	A	-	-	A	A	G	-	A	A	A	A	A	G	A
Bn-A02-p8335312	A/C/-	A02	5300202	+	NA	NA	NA	NA	NA	NA	A	A	C	C	C	C	C	A	A	M	C	A	C	A	A	A	A	A	A	C	C	A	A	A	C	C	C	C	C	A	A	C	A	A	C	A	C	A	C
Bn-A02-p8391383	T/G/-	A02	5341710	+	NA	NA	NA	NA	NA	NA	T	T	T	T	T	T	T	T	T	K	T	T	T	T	T	G	G	G	T	T	T	T	G	T	T	T	T	-	T	T	G	-	T	T	T	T	T	G	-
Bn-A02-p8391574	A/G/-	A02	5341901	+	NA	NA	NA	NA	NA	NA	G	G	A	A	G	G	A	G	G	A	A	G	A	G	G	A	A	A	G	A	A	G	A	G	A	A	A	A	A	G	A	A	G	G	A	G	A	A	A
Bn-A02-p8413531	T/G/-	A02	5365262	+	NA	NA	NA	NA	NA	NA	G	G	T	G	G	G	G	-	G	K	G	G	G	G	G	T	T	T	G	G	T	G	T	G	G	G	G	T	G	G	G	G	G	G	G	G	G	T	G
Bn-A02-p8472166	A/G/-	A02	5407656	+	NA	NA	NA	NA	NA	NA	G	G	A	A	G	G	A	G	G	R	A	G	A	G	A	G	A	G	G	A	A	G	A	G	A	A	G	A	A	G	A	A	G	G	A	G	A	A	A
Bn-A02-p8541841	T/C/-	A02	5510161	+	NA	NA	NA	NA	NA	NA	T	T	T	T	T	T	T	T	T	Y	T	T	T	T	T	C	T	C	T	T	T	T	T	T	T	T	T	T	T	T	T	T	T	T	T	T	T	T	T
Bn-A02-p8554870	T/C/-	A02	5523058	+	NA	NA	NA	NA	NA	NA	C	C	C	C	C	C	C	C	C	C	C	C	C	C	C	C	C	C	C	C	C	C	C	C	C	C	C	C	C	C	C	C	C	C	C	C	C	C	C
Bn-A02-p8560119	A/G/-	A02	5532985	+	NA	NA	NA	NA	NA	NA	R	A	G	G	G	G	G	A	A	G	G	A	G	A	G	G	A	G	A	G	G	A	A	A	G	G	A	G	G	A	G	G	A	A	G	A	G	G	A
Bn-A02-p8571485	A/G/-	A02	5537223	+	NA	NA	NA	NA	NA	NA	G	A	G	G	G	G	G	A	A	G	G	A	G	A	G	G	A	G	A	G	G	A	A	A	G	G	A	G	G	A	G	G	A	A	G	A	G	G	A
Bn-A02-p8625851	T/C/-	A02	5575897	+	NA	NA	NA	NA	NA	NA	Y	Y	Y	Y	C	C	Y	Y	Y	Y	Y	Y	Y	Y	Y	T	Y	Y	-	Y	Y	Y	Y	Y	Y	Y	Y	-	Y	Y	Y	T	Y	Y	Y	Y	Y	-	-
Bn-A02-p8634642	T/G/-	A02	5584729	+	NA	NA	NA	NA	NA	NA	G	G	T	T	G	G	T	G	G	T	T	G	T	G	T	T	G	T	G	T	T	G	G	G	T	T	G	T	T	G	T	T	G	G	T	G	T	T	G
Bn-A02-p8637915	A/C/-	A02	5587554	+	NA	NA	NA	NA	NA	NA	C	C	A	A	C	C	A	C	C	A	A	C	A	C	A	A	C	A	C	A	A	C	C	C	A	A	C	A	A	C	A	A	C	C	A	C	A	A	C
Bn-scaff_20942_1-p695512	T/G/-	A02	5588349	+	NA	NA	NA	NA	NA	NA	G	G	T	T	G	G	T	G	G	T	T	G	T	G	T	T	G	T	G	T	T	G	G	G	T	T	G	T	T	G	T	T	G	G	T	G	T	T	G
Bn-A02-p8660234	T/C/-	A02	5621879	+	NA	NA	NA	NA	NA	NA	C	C	C	C	T	T	C	C	C	C	C	C	C	C	C	T	C	T	C	C	C	C	C	C	C	C	C	C	C	C	C	C	C	C	C	C	C	C	C
Bn-A02-p8660632	A/G/-	A02	5622288	+	NA	NA	NA	NA	NA	NA	G	G	G	G	A	A	G	G	G	G	G	G	G	G	G	A	G	A	G	G	G	G	G	G	G	G	G	G	G	G	G	G	G	G	G	G	G	G	G
Bn-A02-p8747010	T/G/-	A02	5715008	+	NA	NA	NA	NA	NA	NA	G	G	G	G	K	T	G	G	G	G	G	G	G	G	G	T	G	K	G	G	G	G	G	G	G	G	G	G	G	G	G	G	G	G	G	G	G	G	G
Bn-A02-p8834915	A/G/-	A02	5788735	+	NA	NA	NA	NA	NA	NA	G	G	A	A	G	G	A	G	G	A	G	G	A	G	G	A	A	G	G	A	A	G	A	A	G	G	G	A	G	G	A	A	G	G	A	G	G	A	G
Bn-A02-p8836098	T/C/-	A02	5789918	+	NA	NA	NA	NA	NA	NA	T	T	C	C	T	T	C	T	T	C	T	T	C	T	T	T	C	T	T	C	C	T	C	C	T	T	T	C	T	T	C	C	T	T	C	T	T	C	T
Bn-A02-p8877587	T/C/-	A02	5839795	+	NA	NA	NA	NA	NA	NA	C	C	T	T	C	C	T	C	C	T	C	C	T	C	C	C	T	C	C	T	T	C	T	T	C	C	C	T	C	C	T	T	C	C	T	C	C	T	C
Bn-A02-p8880230	A/G/-	A02	5842446	+	NA	NA	NA	NA	NA	NA	G	G	A	A	G	G	A	G	G	A	G	G	A	G	G	G	A	G	G	A	A	G	A	A	G	G	G	A	G	G	A	A	G	G	A	G	G	A	G
Bn-A02-p8899305	A/C/-	A02	5855293	+	NA	NA	NA	NA	NA	NA	A	A	A	A	C	C	A	A	C	A	A	A	A	A	A	A	A	C	A	A	A	A	A	A	A	A	A	A	A	A	A	A	A	A	A	A	A	A	C
Bn-A02-p8912747	A/G/-	A02	5869206	+	NA	NA	NA	NA	NA	NA	A	A	A	A	G	G	A	A	G	A	A	A	A	A	A	A	A	G	A	A	A	A	A	A	A	A	A	A	A	A	A	A	A	A	A	A	A	A	G
Bn-A02-p8915005	T/C/-	A02	5871468	+	NA	NA	NA	NA	NA	NA	C	C	T	T	C	C	T	C	C	T	C	C	T	C	C	C	T	C	C	T	T	C	T	T	C	C	C	T	C	C	T	T	C	C	T	C	C	T	C
Bn-A02-p9225798	T/C/-	A02	6029341	+	NA	NA	NA	NA	NA	NA	T	T	C	C	C	C	C	T	C	Y	T	T	C	T	C	C	C	C	T	C	C	T	C	-	T	T	T	C	T	T	C	C	T	T	C	T	T	C	C
Bn-A02-p9229113	A/G/-	A02	6032647	+	NA	NA	NA	NA	NA	NA	G	G	A	A	A	A	A	G	A	G	G	G	A	G	A	A	A	A	G	A	A	G	A	R	G	G	G	A	G	G	A	A	G	G	A	G	G	A	A
Bn-A02-p9255686	T/C/-	A02	6055602	+	NA	NA	NA	NA	NA	NA	C	C	T	T	T	T	T	C	T	C	C	C	T	C	T	T	T	T	C	T	T	C	T	Y	C	C	C	T	C	C	T	T	C	C	T	C	C	T	T
Bn-A02-p9256040	A/G/-	A02	6055956	+	NA	NA	NA	NA	NA	NA	G	G	A	A	A	A	A	G	A	G	G	G	A	G	A	A	A	A	G	A	A	G	A	R	G	G	G	A	G	G	A	A	G	G	A	G	G	A	A
Bn-A02-p9265512	T/G/-	A02	6067953	+	NA	NA	NA	NA	NA	NA	G	G	T	T	T	T	T	G	T	G	G	G	T	G	-	T	-	T	G	T	T	G	T	K	G	G	G	-	G	G	T	T	G	G	T	G	G	-	-
Bn-A02-p9274719	T/C/-	A02	6079618	+	NA	NA	NA	NA	NA	NA	T	-	T	T	C	C	T	T	C	Y	T	T	T	T	T	T	T	C	T	T	T	T	T	T	T	T	T	T	T	T	T	-	T	T	T	T	T	T	C
Bn-scaff_23813_1-p397311	T/G/-	A02	6137926	+	NA	NA	NA	NA	NA	NA	T	T	G	G	G	G	G	T	G	T	T	T	G	T	G	G	G	G	T	G	G	T	G	K	T	T	T	G	T	T	G	G	T	T	G	T	T	G	G
Bn-A02-p9415636	A/G/-	A02	6232936	+	NA	NA	NA	NA	NA	NA	G	G	G	G	A	A	G	G	A	A	G	G	G	G	G	G	G	A	G	G	G	G	G	G	G	G	G	G	G	G	G	G	G	G	G	G	G	G	A
Bn-A02-p9425125	T/C/-	A02	6249307	+	NA	NA	NA	NA	NA	NA	Y	Y	Y	Y	C	C	Y	Y	C	C	Y	Y	-	Y	Y	Y	Y	C	Y	Y	Y	Y	Y	Y	Y	Y	Y	Y	Y	Y	Y	Y	Y	Y	Y	Y	Y	-	C
Bn-A02-p9505646	T/C/-	A02	6319940	+	NA	NA	NA	NA	NA	NA	C	C	C	C	T	T	C	C	T	C	C	C	C	C	C	C	C	T	C	C	C	C	C	C	C	C	C	C	C	C	C	C	C	C	C	C	C	C	T
Bn-A02-p9506103	T/C/-	A02	6320397	+	NA	NA	NA	NA	NA	NA	C	C	C	C	T	T	C	C	T	C	C	C	C	C	C	C	C	T	C	C	C	C	C	C	C	C	C	C	C	C	C	C	C	C	C	C	C	C	T
Bn-A02-p9519366	A/G/-	A02	6333770	+	NA	NA	NA	NA	NA	NA	G	G	G	G	A	A	G	G	A	R	G	G	G	G	G	G	G	A	G	G	G	G	G	G	G	G	G	G	G	G	G	G	G	G	G	G	G	G	A
Bn-A02-p9648484	T/C/-	A02	6461108	+	NA	NA	NA	NA	NA	NA	T	T	T	T	C	C	T	T	C	T	T	T	T	T	T	T	T	C	T	T	T	T	T	T	T	T	T	T	T	T	T	T	T	T	T	T	T	T	C
Bn-A02-p9684927	T/C/-	A02	6491641	+	NA	NA	NA	NA	NA	NA	T	T	T	T	C	C	T	T	C	-	T	T	T	T	T	T	T	C	T	T	T	T	T	T	T	T	T	T	T	T	T	T	T	T	T	T	T	T	C
Bn-A02-p9719196	A/G/-	A02	6525302	+	NA	NA	NA	NA	NA	NA	A	A	A	A	G	G	A	A	G	A	A	A	A	A	A	A	A	G	A	A	A	A	A	A	A	A	A	A	A	A	A	A	A	A	A	A	A	A	G
Bn-A02-p9722276	T/C/-	A02	6528353	+	NA	NA	NA	NA	NA	NA	C	C	C	C	T	T	C	C	T	-	C	C	C	C	C	C	C	T	C	C	C	C	C	C	C	C	C	C	C	C	C	C	C	C	C	C	C	C	T
Bn-scaff_23546_1-p435046	A/C/-	A02	6700981	+	NA	NA	NA	NA	NA	NA	C	C	C	C	A	A	C	C	A	C	C	C	C	C	C	C	C	A	C	C	C	C	C	C	C	C	C	C	C	C	C	C	C	C	C	C	C	C	A
Bn-A02-p9829719	T/G/-	A02	6702012	+	NA	NA	NA	NA	NA	NA	T	T	T	T	G	G	T	T	G	T	T	T	T	T	T	G	T	G	T	T	T	T	T	T	T	T	T	T	T	T	T	T	T	T	T	T	T	T	G
Bn-A06-p4844167	A/G/-	A02	6712921	+	NA	NA	NA	NA	NA	NA	A	A	A	A	G	G	R	A	G	A	A	R	R	A	A	A	A	G	A	R	R	R	R	R	A	A	A	R	A	A	A	A	A	A	R	A	A	A	G
Bn-A06-p4838544	A/C/-	A02	6716929	+	NA	NA	NA	NA	NA	NA	A	A	A	A	M	C	A	A	C	A	A	A	A	A	A	A	A	M	A	A	A	A	A	A	A	A	A	A	A	A	A	A	A	A	A	A	A	A	C
Bn-A02-p9885351	T/C/-	A02	6730348	+	NA	NA	NA	NA	NA	NA	T	T	T	T	C	C	T	T	C	T	T	T	T	T	T	T	T	C	T	T	T	T	T	T	T	T	T	T	T	T	T	-	T	T	T	T	T	T	C
Bn-A02-p9888208	T/C/-	A02	6733198	+	NA	NA	NA	NA	NA	NA	C	C	C	C	T	T	C	C	T	C	C	C	C	C	C	T	C	T	C	C	C	C	C	C	C	C	C	C	C	C	C	C	C	C	C	C	C	C	T
Bn-A02-p9891733	A/G/-	A02	6736725	+	NA	NA	NA	NA	NA	NA	G	G	G	G	A	A	G	G	A	G	G	G	G	G	G	A	G	A	G	G	G	G	G	G	G	G	G	G	G	G	G	G	G	G	G	G	G	G	A
Bn-A02-p9927808	A/G/-	A02	6770451	+	NA	NA	NA	NA	NA	NA	G	G	G	G	A	A	G	G	A	G	G	-	G	G	-	A	G	A	G	G	G	G	G	G	G	G	-	-	G	G	G	-	-	G	G	G	G	G	A
Bn-A02-p9970848	T/G/-	A02	6818567	+	NA	NA	NA	NA	NA	NA	G	G	G	G	T	T	G	G	T	G	G	G	G	G	G	G	G	T	G	G	G	G	G	G	G	G	G	G	G	G	G	G	G	G	G	G	G	G	T
Bn-A02-p10096185	A/C/-	A02	6922499	+	NA	NA	NA	NA	NA	NA	A	A	A	A	A	A	A	A	A	M	A	A	A	A	A	C	A	A	A	A	A	A	A	A	A	A	A	A	A	A	A	A	A	A	A	A	A	A	A
Bn-A02-p10176579	A/G/-	A02	7019192	+	NA	NA	NA	NA	NA	NA	A	A	A	A	A	A	A	A	A	R	A	A	A	A	A	G	A	A	A	A	A	A	A	A	A	A	A	A	A	A	A	A	A	A	A	A	A	A	A
Bn-A02-p10176749	A/G/-	A02	7019373	+	NA	NA	NA	NA	NA	NA	A	A	A	A	A	A	A	A	A	R	A	A	A	A	A	G	A	A	A	A	A	A	A	A	A	A	A	A	A	A	A	A	A	A	A	A	A	A	A
Bn-A02-p10255955	T/C/-	A02	7109995	+	NA	NA	NA	NA	NA	NA	T	T	T	T	C	C	T	T	C	T	T	T	T	T	T	T	T	C	T	T	T	T	T	T	T	T	T	T	T	T	T	T	T	T	T	T	T	T	C
Bn-A02-p10323998	A/G/-	A02	7170926	+	NA	NA	NA	NA	NA	NA	A	A	A	A	G	G	A	A	G	R	A	A	A	A	A	A	A	G	A	A	A	A	A	A	A	A	A	A	A	A	A	A	A	A	A	A	A	A	G
Bn-A02-p10396907	T/C/-	A02	7267790	+	NA	NA	NA	NA	NA	NA	T	T	T	T	C	C	T	T	C	Y	T	T	T	T	T	T	T	C	T	T	T	T	T	T	T	T	T	T	T	T	T	T	T	T	T	T	T	T	C
Bn-A02-p10815571	T/C/-	A02	7642159	+	NA	NA	NA	NA	NA	NA	T	T	T	T	C	C	T	T	C	C	T	T	T	T	T	T	T	C	T	T	T	T	T	T	T	T	T	T	T	T	T	T	T	T	T	T	T	T	C
Bn-A02-p10850012	A/C/-	A02	7665678	+	NA	NA	NA	NA	NA	NA	A	A	A	A	C	C	A	A	C	A	A	A	A	A	A	A	A	C	A	A	A	A	A	A	A	A	A	A	A	A	A	A	A	A	A	A	A	A	C
Bn-A02-p10869120	T/C/-	A02	7699319	+	NA	NA	NA	NA	NA	NA	T	T	T	T	C	C	T	T	C	C	T	T	T	T	T	T	T	C	T	T	T	T	T	T	T	T	T	T	T	T	T	T	T	T	T	T	T	T	C
Bn-A02-p11038401	A/C/-	A02	7801099	+	NA	NA	NA	NA	NA	NA	A	A	A	A	C	C	A	A	C	M	A	A	A	A	A	A	A	C	A	A	A	A	A	A	A	A	A	A	A	A	A	A	A	A	A	A	A	A	C
Bn-A02-p11039119	A/G/-	A02	7801777	+	NA	NA	NA	NA	NA	NA	A	A	A	A	G	G	A	A	G	A	A	A	A	A	A	A	A	G	A	A	A	A	A	A	A	A	A	A	A	A	A	A	A	A	A	A	A	A	G
Bn-A02-p11041726	T/C/-	A02	7804384	+	NA	NA	NA	NA	NA	NA	T	T	T	T	C	C	T	T	C	T	T	T	T	T	T	T	T	C	T	T	T	T	T	T	T	T	T	T	T	T	T	T	T	T	T	T	T	T	C
Bn-A02-p11070906	T/C/-	A02	7833234	+	NA	NA	NA	NA	NA	NA	C	C	C	C	T	T	C	C	T	Y	C	C	C	C	C	C	C	T	C	C	C	C	C	C	C	C	C	C	C	C	C	C	C	C	C	C	C	C	T
Bn-A02-p11073162	T/C/-	A02	7835707	+	NA	NA	NA	NA	NA	NA	C	C	C	C	T	T	C	C	T	Y	C	C	C	C	C	C	C	T	C	C	C	C	C	C	C	C	C	C	C	C	C	C	C	C	C	C	C	C	T
Bn-A02-p11087388	A/G/-	A02	7846203	+	NA	NA	NA	NA	NA	NA	A	A	A	A	A	A	A	A	A	A	A	A	A	A	A	A	A	A	A	A	A	A	A	A	A	A	A	A	A	A	A	A	A	A	A	A	A	A	A
Bn-scaff_17978_1-p14070	T/G/-	A02	7877080	+	NA	NA	NA	NA	NA	NA	T	T	T	T	T	T	G	T	T	G	T	T	G	T	T	T	T	T	T	T	T	T	T	T	T	T	T	T	T	T	T	T	T	T	T	T	T	T	T
Bn-A02-p11160726	A/G/-	A02	7934142	+	NA	NA	NA	NA	NA	NA	G	G	G	G	A	A	G	G	A	R	G	G	G	G	G	G	G	A	G	G	G	G	G	G	G	G	G	G	G	G	G	G	G	G	G	G	G	G	A
Bn-A02-p11439590	A/G/-	A02	8150371	+	NA	NA	NA	NA	NA	NA	A	A	A	A	G	G	A	A	G	R	A	A	A	A	A	A	A	G	A	A	A	A	A	A	A	A	A	A	A	A	A	A	A	A	A	A	A	A	G
Bn-A02-p11440895	A/C/-	A02	8151677	+	NA	NA	NA	NA	NA	NA	C	C	C	C	A	A	C	C	A	M	C	C	C	C	C	C	C	A	C	C	C	C	C	C	C	C	C	C	C	C	C	C	C	C	C	C	C	C	A
Bn-A02-p11441711	T/G/-	A02	8152495	+	NA	NA	NA	NA	NA	NA	G	G	G	G	T	T	G	G	T	K	G	G	G	G	G	G	G	T	G	G	G	G	G	G	G	G	G	G	G	G	G	G	G	G	G	G	G	G	T
Bn-A02-p11451035	T/C/-	A02	8162870	+	NA	NA	NA	NA	NA	NA	T	T	T	T	C	C	T	T	C	Y	T	T	T	T	T	T	T	C	T	T	T	T	T	T	T	T	T	T	T	T	T	T	T	T	T	T	T	T	C
Bn-A02-p11454010	T/G/-	A02	8166003	+	NA	NA	NA	NA	NA	NA	G	G	G	G	T	T	G	G	T	K	G	G	G	G	G	G	G	T	G	G	G	G	G	G	G	G	G	G	G	G	G	G	G	G	G	G	G	G	T
Bn-A02-p11454573	T/C/-	A02	8166563	+	NA	NA	NA	NA	NA	NA	C	C	C	C	T	T	C	C	T	Y	C	C	C	C	C	C	C	T	C	C	C	C	C	C	C	C	C	C	C	C	C	C	C	C	C	C	C	C	T
Bn-A02-p11454658	A/G/-	A02	8166651	+	NA	NA	NA	NA	NA	NA	G	G	G	G	A	A	G	G	A	R	G	G	G	G	G	G	G	A	G	G	G	G	G	G	G	G	G	G	G	G	G	G	G	G	G	G	G	G	A
Bn-A02-p11457727	A/G/-	A02	8169719	+	NA	NA	NA	NA	NA	NA	A	A	A	A	G	G	A	A	G	R	A	A	A	A	A	A	A	G	A	A	A	A	A	A	A	A	A	A	A	A	A	A	A	A	A	A	A	A	G
Bn-A02-p11479169	T/G/-	A02	8194213	+	NA	NA	NA	NA	NA	NA	G	G	G	G	T	T	G	G	T	K	G	G	G	G	G	G	G	T	G	G	G	G	G	G	G	G	G	G	G	G	G	G	G	G	G	G	G	G	T
Bn-A02-p11517785	T/G/-	A02	8233311	+	NA	NA	NA	NA	NA	NA	T	T	T	T	G	G	T	T	G	T	T	T	T	T	T	T	T	G	T	T	T	T	T	T	T	T	-	T	T	T	T	-	T	T	T	T	T	T	G
Bn-A02-p11259297	A/G/-	A02	8266354	+	NA	NA	NA	NA	NA	NA	G	G	G	G	A	A	G	G	A	R	G	G	G	G	G	G	G	A	G	G	G	G	G	G	G	G	G	G	G	G	G	G	G	G	G	G	G	G	A
Bn-A02-p11262178	A/G/-	A02	8269389	+	NA	NA	NA	NA	NA	NA	A	A	A	A	G	G	A	A	G	R	A	A	A	A	A	A	A	G	A	A	A	A	A	A	A	A	A	A	A	A	A	A	A	A	A	A	A	A	G
Bn-scaff_15838_3-p220348	T/C/-	A02	8329452	+	NA	NA	NA	NA	NA	NA	T	T	T	T	C	C	T	T	C	-	T	T	T	T	T	T	T	C	T	T	T	T	T	T	T	T	T	T	T	T	T	T	T	T	T	T	T	T	C
Bn-A02-p11737945	T/C/-	A02	8450512	+	NA	NA	NA	NA	NA	NA	C	C	C	C	T	T	C	C	T	Y	C	C	C	C	C	C	C	T	C	C	C	C	C	C	C	C	C	C	C	C	C	C	C	C	C	C	C	C	T
Bn-A02-p11748602	A/G/-	A02	8459328	+	NA	NA	NA	NA	NA	NA	G	G	G	G	A	A	G	G	A	R	G	G	G	G	G	G	G	A	G	G	G	G	G	G	G	G	G	G	G	G	G	G	G	G	G	G	G	G	A
Bn-A02-p11816790	T/C/-	A02	8522674	+	NA	NA	NA	NA	NA	NA	T	T	T	T	C	C	T	T	C	T	T	T	T	T	T	T	T	C	T	T	T	T	T	T	T	T	T	T	T	T	T	T	T	T	T	T	T	T	C
Bn-A02-p11817742	T/G/-	A02	8524524	+	NA	NA	NA	NA	NA	NA	T	T	T	T	G	G	T	T	G	T	T	T	T	T	T	T	T	G	T	T	T	T	T	T	T	T	T	T	T	T	T	-	T	T	T	T	T	-	G
Bn-A02-p11842725	T/C/-	A02	8550776	+	NA	NA	NA	NA	NA	NA	T	T	T	T	C	C	T	T	C	C	T	T	T	T	T	T	T	C	T	T	T	T	T	T	T	T	T	T	T	T	T	T	T	T	T	T	T	T	C
Bn-A02-p11849409	T/C/-	A02	8560451	+	NA	NA	NA	NA	NA	NA	T	T	T	T	C	C	T	T	C	-	T	T	T	T	T	T	T	C	T	T	T	T	T	T	T	T	T	T	T	T	T	T	T	T	T	T	T	T	C
Bn-A02-p11859430	T/G/-	A02	8570657	+	NA	NA	NA	NA	NA	NA	T	T	T	T	G	G	T	T	G	T	T	T	T	T	T	T	T	G	T	T	T	T	T	T	T	T	T	T	T	T	T	T	T	T	T	T	T	T	G
Bn-A02-p11863349	T/C/-	A02	8574522	+	NA	NA	NA	NA	NA	NA	C	C	C	C	C	C	C	C	C	Y	C	C	C	C	C	C	C	C	C	C	C	C	C	C	C	C	C	C	C	C	C	C	C	C	C	C	C	C	C
Bn-A02-p11870177	A/G/-	A02	8579417	+	NA	NA	NA	NA	NA	NA	A	A	A	A	A	A	A	A	A	R	A	A	A	A	A	A	A	A	A	A	A	A	A	A	A	A	A	A	A	A	A	A	A	A	A	A	A	A	A
Bn-A02-p11896538	A/C/-	A02	8599446	+	NA	NA	NA	NA	NA	NA	C	C	C	C	C	C	C	C	C	A	C	C	C	C	C	C	C	C	C	C	C	C	C	C	C	C	C	C	C	C	C	C	C	C	C	C	C	C	C
Bn-A02-p11906704	A/G/-	A02	8616153	+	NA	NA	NA	NA	NA	NA	G	G	G	G	G	G	G	G	G	A	G	G	G	G	G	G	G	G	G	G	G	G	G	G	G	G	G	G	G	G	G	G	G	G	G	G	G	G	G
Bn-A02-p11937221	A/G/-	A02	8650073	+	NA	NA	NA	NA	NA	NA	A	A	A	A	A	A	A	A	A	R	A	A	A	A	A	A	A	A	A	A	A	A	A	A	A	A	A	A	A	A	A	A	A	A	A	A	A	A	A
Bn-A02-p11939715	A/C/-	A02	8652573	+	NA	NA	NA	NA	NA	NA	A	A	A	A	A	A	A	A	A	M	A	A	A	A	A	A	A	A	A	A	A	A	A	A	A	A	A	A	A	A	A	A	A	A	A	A	A	A	A
Bn-A02-p11939983	A/G/-	A02	8652840	+	NA	NA	NA	NA	NA	NA	G	G	G	G	G	G	G	G	G	A	G	G	G	G	G	G	G	G	G	G	G	G	G	G	G	G	G	G	G	G	G	G	G	G	G	G	G	G	G
Bn-A02-p11960741	T/C/-	A02	8674144	+	NA	NA	NA	NA	NA	NA	T	T	T	T	C	C	T	T	C	Y	T	T	T	T	T	T	T	C	T	T	T	T	T	T	T	T	T	T	T	T	T	T	T	T	T	T	T	T	C
Bn-A02-p11961581	A/G/-	A02	8674984	+	NA	NA	NA	NA	NA	NA	A	A	A	A	G	G	A	A	G	R	A	A	A	A	A	A	A	G	A	A	A	A	A	A	A	A	A	A	A	A	A	A	A	A	A	A	A	A	G
Bn-A02-p11994999	A/C/-	A02	8701636	+	NA	NA	NA	NA	NA	NA	A	A	A	A	C	C	A	A	C	M	A	A	A	A	A	A	A	C	A	A	A	A	A	A	A	A	A	A	A	A	A	A	A	A	A	A	A	A	C
Bn-A02-p11998345	T/C/-	A02	8704975	+	NA	NA	NA	NA	NA	NA	T	T	T	T	C	C	T	T	C	Y	T	T	T	T	T	T	T	C	T	T	T	T	T	T	T	T	T	T	T	T	T	T	T	T	T	T	T	T	C
Bn-A02-p11998540	T/C/-	A02	8705170	+	NA	NA	NA	NA	NA	NA	T	T	T	T	C	C	T	T	C	Y	T	T	T	T	T	T	T	C	T	T	T	T	T	T	T	T	T	T	T	T	T	T	T	T	T	T	T	T	C
Bn-A02-p11998921	T/C/-	A02	8705552	+	NA	NA	NA	NA	NA	NA	T	T	T	T	C	C	T	T	C	Y	T	T	T	T	T	T	T	C	T	T	T	T	T	T	T	T	T	T	T	T	T	T	T	T	T	T	T	T	C
Bn-A02-p12003125	A/G/-	A02	8709826	+	NA	NA	NA	NA	NA	NA	A	A	G	G	A	A	G	A	A	A	G	A	G	A	G	A	G	A	A	G	G	A	G	A	A	A	A	G	A	A	G	G	A	A	G	A	A	G	A
Bn-A02-p12061350	A/C/-	A02	8776717	+	NA	NA	NA	NA	NA	NA	C	C	A	A	A	A	A	C	A	M	A	C	A	C	A	C	A	A	C	A	A	C	A	C	C	C	C	A	C	C	A	A	C	C	A	C	C	A	A
Bn-A02-p12081581	A/G/-	A02	8800956	+	NA	NA	NA	NA	NA	NA	A	A	G	G	G	G	G	A	G	R	G	A	G	A	G	A	G	G	A	G	G	A	G	A	A	A	A	G	A	A	G	G	A	A	G	A	A	G	G
Bn-A02-p12107746	T/C/-	A02	8825512	+	NA	NA	NA	NA	NA	NA	C	C	C	C	T	T	C	C	T	C	C	C	C	C	C	C	C	T	C	C	C	C	C	C	C	C	C	C	C	C	C	C	C	C	C	C	C	C	T
Bn-A02-p12107868	T/C/-	A02	8825634	+	NA	NA	NA	NA	NA	NA	C	C	C	C	T	T	C	C	T	C	C	C	C	C	C	C	C	T	C	C	C	C	C	C	C	C	C	C	C	C	C	C	C	C	C	C	C	C	T
Bn-A02-p12164268	A/G/-	A02	8872498	+	NA	NA	NA	NA	NA	NA	A	A	A	A	A	A	A	A	A	A	A	A	A	A	A	A	A	A	A	A	A	A	A	A	A	A	A	A	A	A	A	A	A	A	A	A	A	A	A
Bn-A02-p12179107	T/C/-	A02	8887638	+	NA	NA	NA	NA	NA	NA	C	C	T	T	C	C	T	C	C	T	T	C	T	C	T	C	T	C	C	T	T	C	T	C	C	C	C	T	C	C	T	T	C	C	T	C	C	T	C
Bn-A02-p12192921	A/G/-	A02	8898782	+	NA	NA	NA	NA	NA	NA	G	G	A	A	G	G	A	G	G	A	A	G	A	G	A	G	A	G	G	A	A	G	A	G	G	G	G	A	G	G	A	A	G	G	A	G	G	A	G
Bn-A02-p12278577	T/C/-	A02	8993676	+	NA	NA	NA	NA	NA	NA	T	T	C	C	T	T	T	T	T	Y	T	T	C	T	C	T	C	T	T	C	C	T	C	T	T	T	T	C	T	T	C	C	T	T	C	T	T	C	T
Bn-A02-p12284671	A/C/-	A02	9000889	+	NA	NA	NA	NA	NA	NA	C	C	A	A	C	C	C	C	C	A	C	C	A	C	A	C	A	C	C	A	A	C	A	C	C	C	C	A	C	C	A	A	C	C	A	C	C	A	C
Bn-A02-p12295682	A/G/-	A02	9011903	+	NA	NA	NA	NA	NA	NA	G	G	A	A	G	G	A	G	G	A	A	G	A	G	A	G	A	G	G	A	A	G	A	G	G	G	G	A	G	G	A	A	G	G	A	G	G	A	G
Bn-A02-p12297473	A/G/-	A02	9013718	+	NA	NA	NA	NA	NA	NA	A	A	G	G	A	A	G	A	A	G	G	A	G	A	G	A	G	A	A	G	G	A	G	A	A	A	A	G	A	A	G	G	A	A	G	A	A	G	A
Bn-A02-p12393535	A/C/-	A02	9107414	+	NA	NA	NA	NA	NA	NA	C	C	A	A	C	C	C	C	C	M	C	C	A	C	A	C	A	C	C	A	A	C	A	C	C	C	C	A	C	C	A	A	C	C	A	C	C	A	C
Bn-A02-p12397326	A/G/-	A02	9111180	+	NA	NA	NA	NA	NA	NA	A	-	G	G	G	G	A	A	G	G	A	A	G	A	G	A	G	G	A	G	G	A	G	A	A	A	A	G	A	A	G	G	A	A	G	A	A	G	G
Bn-A02-p12397585	A/G/-	A02	9111439	+	NA	NA	NA	NA	NA	NA	A	A	G	G	G	G	A	A	G	R	A	A	G	A	G	A	G	G	A	G	G	A	G	A	A	A	A	G	A	A	G	G	A	A	G	A	A	G	G
Bn-A02-p12415095	T/C/-	A02	9130270	+	NA	NA	NA	NA	NA	NA	T	T	T	T	C	C	T	T	Y	Y	T	T	-	T	T	T	T	C	T	T	T	T	T	T	T	T	T	T	T	T	T	T	T	T	T	T	T	T	C
Bn-A02-p12512160	T/C/-	A02	9230359	+	NA	NA	NA	NA	NA	NA	T	T	C	C	T	T	C	T	T	Y	C	T	C	T	C	T	C	T	T	C	C	T	C	T	T	T	T	C	T	T	C	C	T	T	C	T	T	C	T
Bn-A02-p12524852	T/C/-	A02	9251385	+	NA	NA	NA	NA	NA	NA	C	C	T	T	C	C	T	C	C	Y	T	C	T	C	T	C	T	C	C	T	T	C	T	C	C	C	C	T	C	C	T	T	C	C	T	C	C	T	C
Bn-A02-p12550795	A/G/-	A02	9277456	+	NA	NA	NA	NA	NA	NA	G	G	G	G	A	A	G	G	R	R	G	G	G	G	G	G	G	A	G	G	G	G	G	G	G	G	G	G	G	G	G	G	G	G	G	G	G	G	A
Bn-A02-p12552323	A/C/-	A02	9278984	+	NA	NA	NA	NA	NA	NA	C	C	C	C	A	A	C	C	-	M	C	C	C	C	C	C	C	A	C	C	C	C	C	C	C	C	C	C	C	C	C	C	C	C	C	C	C	C	A
Bn-A02-p12554865	T/C/-	A02	9281526	+	NA	NA	NA	NA	NA	NA	C	C	T	T	C	C	T	C	C	Y	T	C	T	C	T	C	T	C	C	T	T	C	T	C	C	C	C	T	C	C	T	T	C	C	T	C	C	T	C
Bn-A02-p12608089	T/C/-	A02	9345489	+	NA	NA	NA	NA	NA	NA	C	C	C	C	T	T	C	C	-	Y	C	C	C	C	C	C	C	T	C	C	C	C	C	C	C	C	C	C	C	C	C	C	C	C	C	C	C	C	T
Bn-A02-p12637974	A/G/-	A02	9405645	+	NA	NA	NA	NA	NA	NA	A	A	A	A	G	G	A	A	R	R	A	A	A	A	A	A	A	G	A	A	A	A	A	A	A	A	A	A	A	A	A	A	A	A	A	A	A	A	G
Bn-A02-p12681201	T/G/-	A02	9446129	+	NA	NA	NA	NA	NA	NA	G	G	G	G	T	T	G	G	T	K	G	G	G	G	G	G	G	T	G	G	G	G	G	G	G	G	G	G	G	G	G	G	G	G	G	G	G	G	T
Bn-A02-p12686417	A/G/-	A02	9451322	+	NA	NA	NA	NA	NA	NA	A	A	A	A	G	G	A	A	R	R	A	A	A	A	A	A	A	G	A	A	A	A	A	A	A	A	A	A	A	A	A	A	A	A	A	A	A	A	G
Bn-A02-p12688495	T/C/-	A02	9453402	+	NA	NA	NA	NA	NA	NA	T	T	T	T	C	C	T	T	-	Y	T	T	T	T	T	T	T	C	T	T	T	T	T	T	T	T	T	T	T	T	T	T	T	T	T	T	T	T	C
Bn-A02-p12688906	A/G/-	A02	9453813	+	NA	NA	NA	NA	NA	NA	G	G	G	G	A	A	G	G	R	R	G	G	G	G	G	G	G	A	G	G	G	G	G	G	G	G	G	G	G	G	G	G	G	G	G	G	G	G	A
Bn-A02-p12693516	A/G/-	A02	9460659	+	NA	NA	NA	NA	NA	NA	A	A	A	A	G	G	A	A	G	R	A	A	A	A	A	A	A	G	A	A	A	A	A	A	A	A	A	A	A	A	A	A	A	A	A	A	A	A	G
Bn-A02-p12756887	A/G/-	A02	9490339	+	NA	NA	NA	NA	NA	NA	G	G	G	G	A	A	G	G	-	R	G	G	G	G	G	G	G	A	G	G	G	G	G	G	G	G	G	G	G	G	G	G	G	G	G	G	G	G	A
Bn-scaff_20735_1-p10055	T/C/-	A02	9560451	+	NA	NA	NA	NA	NA	NA	C	C	C	C	T	T	C	C	-	Y	C	C	C	C	C	C	C	T	C	C	C	C	C	C	C	C	C	C	C	C	C	C	C	C	C	C	C	C	T
Bn-A02-p12815817	T/C/-	A02	9566657	+	NA	NA	NA	NA	NA	NA	T	T	T	T	T	T	T	T	T	T	T	T	T	T	T	T	T	T	T	T	T	T	T	T	T	T	T	T	T	T	T	T	T	T	T	T	T	T	T
Bn-A02-p12819772	T/C/-	A02	9570321	+	NA	NA	NA	NA	NA	NA	T	T	T	T	T	T	T	T	T	T	T	T	T	T	T	T	T	T	T	T	T	T	T	T	T	T	T	T	T	T	T	T	T	T	T	T	T	T	T
Bn-A02-p12822311	A/G/-	A02	9572852	+	NA	NA	NA	NA	NA	NA	A	A	A	A	A	A	A	A	A	A	A	A	A	A	A	A	A	A	A	A	A	A	A	A	A	A	A	A	A	A	A	A	A	A	A	A	A	A	A
Bn-A02-p12851818	A/G/-	A02	9607188	+	NA	NA	NA	NA	NA	NA	A	A	G	G	A	A	G	A	A	R	G	A	G	A	G	A	G	A	A	G	G	A	G	A	A	A	A	G	A	A	G	G	A	A	G	A	A	G	A
Bn-A03-p31160337	T/C/-	A02	9630993	+	NA	NA	NA	NA	NA	NA	C	C	T	T	C	C	T	C	C	T	T	C	T	C	T	C	T	C	C	T	T	C	T	C	C	C	C	T	C	C	T	T	C	C	T	C	C	T	C
Bn-A02-p12971726	T/C/-	A02	9683713	+	NA	NA	NA	NA	NA	NA	T	T	C	C	T	T	C	T	T	C	C	T	C	T	C	T	C	T	T	C	C	T	C	T	T	T	T	C	T	T	C	C	T	T	C	T	T	C	T
Bn-A02-p12972954	T/C/-	A02	9684935	+	NA	NA	NA	NA	NA	NA	C	C	T	T	C	C	T	C	C	T	T	C	T	C	T	C	T	C	C	T	T	C	T	C	C	C	C	T	C	C	T	T	C	C	T	C	C	T	C
Bn-A02-p12986045	A/G/-	A02	9694333	+	NA	NA	NA	NA	NA	NA	A	A	G	G	A	A	G	A	A	G	G	A	G	A	G	A	G	A	A	G	G	A	G	A	A	A	A	G	A	A	G	G	A	A	G	A	A	G	A
Bn-A02-p12996998	T/C/-	A02	9705856	+	NA	NA	NA	NA	NA	NA	T	T	C	C	T	T	C	T	T	C	C	T	C	T	C	T	C	T	T	C	C	T	C	T	T	C	T	C	C	T	C	C	T	T	C	T	T	C	T
Bn-A02-p12999856	T/C/-	A02	9710637	+	NA	NA	NA	NA	NA	NA	T	T	C	C	T	T	C	T	T	C	C	T	C	T	C	T	C	T	T	C	C	T	C	T	T	C	T	C	C	T	C	C	T	T	C	T	T	C	T
Bn-A02-p13000494	T/G/-	A02	9711308	+	NA	NA	NA	NA	NA	NA	G	G	T	T	G	G	T	G	G	T	T	G	T	G	T	G	T	G	G	T	T	G	T	G	G	T	G	T	T	G	T	T	G	G	T	G	G	T	G
Bn-A02-p13019236	T/G/-	A02	9728637	+	NA	NA	NA	NA	NA	NA	T	T	G	G	T	T	G	T	T	G	G	T	G	T	G	T	G	T	T	G	G	T	G	T	T	G	T	G	G	T	G	G	T	T	G	T	T	G	T
Bn-A02-p13118529	T/G/-	A02	9783806	+	NA	NA	NA	NA	NA	NA	G	G	G	G	G	G	G	G	G	G	G	G	G	G	G	G	G	G	G	G	G	G	G	G	G	G	G	G	G	G	G	G	G	G	G	G	G	G	G
Bn-A02-p13121161	T/G/-	A02	9784471	+	NA	NA	NA	NA	NA	NA	T	T	G	T	G	K	G	T	T	G	G	T	G	T	G	T	G	T	T	G	G	T	G	T	K	G	K	K	G	T	T	K	-	T	G	T	-	G	K
Bn-A02-p13123802	A/C/-	A02	9785309	+	NA	NA	NA	NA	NA	NA	C	C	A	C	A	C	A	C	C	A	A	C	A	C	A	C	A	C	C	A	A	C	A	C	M	A	C	C	A	C	C	C	C	C	A	C	C	A	C
Bn-A02-p13153436	T/G/-	A02	9833852	+	NA	NA	NA	NA	NA	NA	G	G	G	G	G	G	G	G	G	G	G	G	G	G	G	G	G	G	G	G	G	G	G	G	G	G	G	G	G	G	G	G	G	G	G	G	G	G	G
Bn-A02-p13212386	T/C/-	A02	9894440	+	NA	NA	NA	NA	NA	NA	C	C	-	C	T	C	T	C	C	T	T	C	T	C	T	C	T	C	C	T	T	C	T	C	Y	T	C	C	T	C	C	C	C	C	T	C	C	T	C
Bn-A02-p13556392	T/C/-	A02	10230487	+	NA	NA	NA	NA	NA	NA	T	T	C	T	C	C	C	T	-	C	C	T	C	T	C	T	C	C	T	C	C	T	C	T	Y	C	T	T	C	T	C	T	T	T	C	T	T	C	C
Bn-A02-p13751737	T/C/-	A02	10372417	+	NA	NA	NA	NA	NA	NA	C	C	T	C	T	C	T	C	C	T	Y	C	-	C	T	C	T	C	C	T	T	C	-	C	Y	T	C	C	-	C	T	C	C	C	T	C	C	Y	C
Bn-A02-p13794668	A/G/-	A02	10424362	+	NA	NA	NA	NA	NA	NA	G	G	A	G	A	G	A	G	G	A	A	G	A	G	A	G	A	G	G	A	A	G	A	G	R	A	G	G	A	G	A	G	G	G	A	G	G	A	G
Bn-A02-p14287347	T/C/-	A02	10659885	+	NA	NA	NA	NA	NA	NA	C	C	C	C	C	T	C	C	Y	C	C	C	C	C	C	C	C	T	C	C	C	C	C	C	C	C	C	C	C	C	C	C	C	C	C	C	C	C	T
Bn-A02-p14293315	T/C/-	A02	10663869	+	NA	NA	NA	NA	NA	NA	C	C	C	C	C	T	C	C	Y	C	C	C	C	C	C	C	C	T	C	C	C	C	C	C	C	C	C	C	C	C	C	C	C	C	C	C	C	C	T
Bn-A02-p14130758	A/G/-	A02	10920390	+	NA	NA	NA	NA	NA	NA	R	R	A	R	R	A	A	R	A	A	R	R	A	R	R	A	R	R	R	R	R	R	R	R	R	R	R	R	A	R	R	R	R	R	R	R	R	R	R
Bn-A02-p14145586	A/G/-	A02	10933577	+	NA	NA	NA	NA	NA	NA	A	A	A	A	A	G	A	A	R	A	A	A	A	A	A	A	A	G	A	A	A	A	A	A	A	A	A	A	A	A	A	A	A	A	A	A	A	A	G
Bn-scaff_16903_1-p412972	A/G/-	A02	10951559	+	NA	NA	NA	NA	NA	NA	G	G	G	G	G	-	G	G	R	G	G	G	G	G	G	G	G	A	G	G	G	G	G	G	G	G	G	G	G	G	G	G	G	G	G	G	G	G	A
Bn-A02-p14170476	A/G/-	A02	10953896	+	NA	NA	NA	NA	NA	NA	G	G	G	G	G	A	G	G	R	G	G	G	G	G	G	G	G	A	G	G	G	G	G	G	G	G	G	G	G	G	G	G	G	G	G	G	G	G	A
Bn-A02-p14208801	A/G/-	A02	10992036	+	NA	NA	NA	NA	NA	NA	A	A	A	A	A	G	A	A	R	A	A	A	A	A	A	A	A	-	A	A	A	A	A	A	A	A	A	A	A	A	A	A	A	A	A	A	A	A	G
Bn-scaff_18849_1-p209698	A/G/-	A02	11079752	+	NA	NA	NA	NA	NA	NA	G	G	G	G	G	A	A	G	A	G	G	A	A	G	A	A	G	R	A	A	G	G	A	G	G	G	G	A	G	G	G	A	G	G	A	G	G	A	G
Bn-A02-p14650284	T/G/-	A02	11107656	+	NA	NA	NA	NA	NA	NA	T	T	T	T	T	G	T	T	K	T	T	T	T	T	T	T	T	G	T	T	T	T	T	T	T	T	T	T	T	T	T	T	T	T	T	T	T	T	G
Bn-A02-p14612382	A/G/-	A02	11164689	+	NA	NA	NA	NA	NA	NA	A	A	A	A	A	G	A	A	G	A	A	A	A	A	A	A	A	-	A	A	A	A	A	A	A	A	A	A	A	A	A	A	A	A	A	A	A	A	G
Bn-A02-p14605944	T/C/-	A02	11171746	+	NA	NA	NA	NA	NA	NA	C	C	C	C	C	T	C	C	-	C	C	C	C	C	C	C	C	T	C	C	C	C	C	C	C	C	C	C	C	C	C	C	C	C	C	C	C	C	T
Bn-A02-p14579685	T/G/-	A02	11191966	+	NA	NA	NA	NA	NA	NA	T	T	T	T	T	G	T	T	K	T	T	T	T	T	T	T	T	G	T	T	T	T	T	T	T	T	T	T	T	T	T	T	T	T	T	T	T	T	G
Bn-A02-p14530693	T/G/-	A02	11232627	+	NA	NA	NA	NA	NA	NA	G	G	G	K	G	-	G	G	K	G	G	G	G	G	G	G	G	T	G	G	G	G	G	G	G	G	G	G	G	G	K	K	G	G	G	G	G	-	T
Bn-A02-p14526876	T/C/-	A02	11236459	+	NA	NA	NA	NA	NA	NA	C	C	C	C	C	T	C	C	-	C	C	C	C	C	C	C	C	T	C	C	C	C	C	C	C	C	C	C	C	C	C	C	C	C	C	C	C	C	T
Bn-A02-p14996107	A/C/-	A02	11608766	+	NA	NA	NA	NA	NA	NA	A	A	A	C	C	A	C	A	A	C	C	A	C	A	C	A	C	A	A	C	C	A	C	A	A	C	A	A	C	A	C	C	A	A	C	A	A	C	A
Bn-A02-p15569271	A/G/-	A02	11995191	+	NA	NA	NA	NA	NA	NA	G	G	G	G	G	G	G	G	G	G	G	G	G	G	G	G	G	G	G	G	G	G	G	G	G	G	G	G	G	G	G	G	G	G	G	G	G	G	G
Bn-A02-p15693192	T/C/-	A02	12089164	+	NA	NA	NA	NA	NA	NA	T	T	C	C	C	C	C	T	C	C	C	T	C	T	C	T	C	C	T	C	C	T	C	T	T	C	T	T	C	T	C	C	T	T	C	T	T	C	C
Bn-A02-p15750257	A/C/-	A02	12168179	+	NA	NA	NA	NA	NA	NA	C	C	A	A	A	A	A	C	A	A	A	C	A	C	A	C	A	A	C	A	A	C	A	C	C	A	C	C	A	C	A	A	C	C	A	C	C	A	A
Bn-A02-p15870327	T/C/-	A02	12249503	+	NA	NA	NA	NA	NA	NA	C	C	T	T	T	T	T	C	-	T	T	C	T	C	T	C	T	T	C	T	T	C	T	C	C	T	C	C	T	C	T	T	C	C	T	C	C	T	T
Bn-A02-p15884717	A/C/-	A02	12262242	+	NA	NA	NA	NA	NA	NA	C	C	A	A	A	A	A	C	M	A	A	C	A	C	A	C	A	A	C	A	A	C	A	C	C	C	C	C	A	C	A	A	C	C	A	C	C	A	A
Bn-A02-p15912199	T/G/-	A02	12286150	+	NA	NA	NA	NA	NA	NA	T	T	T	T	T	T	T	T	T	K	T	T	T	T	T	T	T	T	T	T	T	T	T	T	T	T	T	T	T	T	T	T	T	T	T	T	T	T	T
Bn-A02-p16526928	A/G/-	A02	12747102	+	NA	NA	NA	NA	NA	NA	G	G	G	G	G	G	G	G	G	G	G	G	G	G	G	G	G	G	G	G	G	G	G	G	G	G	G	G	G	G	G	G	G	G	G	G	G	G	G
Bn-A02-p16571709	A/C/-	A02	12788306	+	NA	NA	NA	NA	NA	NA	C	C	A	A	A	A	A	C	-	A	A	C	A	C	A	C	A	A	C	A	A	C	A	C	C	C	C	C	A	C	A	A	C	C	-	C	C	A	A
Bn-A05-p9250358	T/G/-	A02	12869710	+	NA	NA	NA	NA	NA	NA	G	G	T	T	T	T	T	G	K	T	T	G	T	G	T	G	T	T	G	T	T	G	T	G	G	G	G	G	T	G	T	T	G	G	K	G	G	T	T
Bn-A05-p9247748	T/C/-	A02	12872269	+	NA	NA	NA	NA	NA	NA	C	C	T	T	T	T	T	C	T	T	T	C	T	C	T	C	T	T	C	T	T	C	T	C	C	C	C	C	T	C	T	T	C	C	T	C	C	T	T
Bn-scaff_22749_1-p558264	T/G/-	A02	13048261	+	NA	NA	NA	NA	NA	NA	G	G	T	T	G	T	T	G	-	T	T	G	T	G	-	G	G	T	G	T	T	G	G	G	G	G	G	G	T	G	T	T	G	G	-	G	G	T	T
Bn-A05-p8376865	T/G/-	A02	13790524	+	NA	NA	NA	NA	NA	NA	G	G	G	G	G	G	G	G	G	G	G	G	G	G	G	G	G	G	G	G	G	G	G	G	G	G	G	G	G	G	G	G	G	G	G	G	G	G	G
Bn-A02-p17156661	A/C/-	A02	14324775	+	NA	NA	NA	NA	NA	NA	C	C	C	C	C	C	C	C	C	C	C	C	C	C	C	C	C	C	C	C	C	C	C	C	C	C	C	C	C	C	C	C	C	C	C	C	C	C	C
Bn-A05-p17835705	A/G/-	A02	17453298	+	NA	NA	NA	NA	NA	NA	G	G	G	A	G	A	A	G	G	G	A	G	G	G	G	G	G	A	G	G	A	A	G	G	G	G	G	A	G	G	G	A	G	G	A	G	G	R	A
Bn-scaff_21705_1-p627483	A/C/-	A02	17622885	+	NA	NA	NA	NA	NA	NA	C	C	C	C	C	A	C	A	A	C	C	A	-	C	M	C	C	A	C	-	C	C	C	A	C	C	C	C	A	C	A	A	C	C	A	C	C	C	C
Bn-scaff_21705_1-p547034	T/C/-	A02	17702351	+	NA	NA	NA	NA	NA	NA	T	T	T	T	T	C	T	C	C	T	T	C	C	T	C	T	T	C	T	C	C	T	T	C	T	T	T	T	C	T	C	C	T	T	C	T	T	T	T
Bn-A02-p18974322	T/C/-	A02	17985162	+	NA	NA	NA	NA	NA	NA	C	C	C	T	C	C	C	T	C	T	C	C	C	C	Y	C	C	C	C	C	T	C	C	C	C	C	C	T	T	C	C	T	C	C	T	C	C	C	C
Bn-A02-p18994472	A/G/-	A02	17997856	+	NA	NA	NA	NA	NA	NA	G	G	G	A	G	G	G	A	G	A	G	G	G	G	G	G	G	G	G	G	A	G	G	G	G	G	G	A	A	G	G	A	G	G	R	G	G	G	G
Bn-A02-p19003944	A/G/-	A02	18003185	+	NA	NA	NA	NA	NA	NA	A	A	A	G	A	A	A	G	A	G	A	A	A	A	A	A	A	A	A	A	G	A	A	A	A	A	A	G	G	A	A	G	A	A	-	A	A	A	A
Bn-A02-p19049506	T/C/-	A02	18088762	+	NA	NA	NA	NA	NA	NA	T	T	T	T	T	T	T	T	T	Y	T	T	T	T	T	T	T	T	T	T	T	T	T	T	T	T	T	T	C	T	T	T	T	T	T	T	T	T	T
Bn-A02-p19070958	T/C/-	A02	18106291	+	NA	NA	NA	NA	NA	NA	T	T	T	T	T	T	T	T	T	Y	T	T	T	T	T	T	T	T	T	T	T	T	T	T	T	T	T	T	C	T	T	T	T	T	T	T	T	T	T
Bn-A02-p19174964	T/C/-	A02	18212940	+	NA	NA	NA	NA	NA	NA	C	C	C	C	C	C	C	C	C	Y	C	C	C	C	C	C	C	C	C	C	C	C	C	C	C	C	C	C	T	C	C	C	C	C	C	C	C	C	C
Bn-A02-p19201685	T/C/-	A02	18243835	+	NA	NA	NA	NA	NA	NA	C	C	C	C	C	C	C	C	C	Y	C	C	C	C	C	C	C	C	C	C	C	C	C	C	C	C	C	C	T	C	C	C	C	C	C	C	C	C	C
Bn-A02-p19261853	A/G/-	A02	18305260	+	NA	NA	NA	NA	NA	NA	R	R	R	G	R	R	R	G	R	R	R	R	R	R	R	R	R	R	R	R	G	R	R	R	R	R	R	G	R	R	R	G	R	R	G	R	R	R	R
Bn-A02-p19348348	T/C/-	A02	18325487	+	NA	NA	NA	NA	NA	NA	T	T	T	C	T	T	T	C	T	C	T	T	T	T	-	T	T	T	T	T	C	T	T	T	T	T	T	C	C	T	T	C	T	T	Y	T	T	T	T
Bn-A02-p19450017	T/C/-	A02	18408223	+	NA	NA	NA	NA	NA	NA	T	T	T	C	T	T	T	C	T	C	T	T	T	T	T	T	T	T	T	T	C	T	T	T	T	T	T	C	C	T	T	C	T	T	-	T	T	T	T
Bn-A02-p19450418	A/C/-	A02	18408624	+	NA	NA	NA	NA	NA	NA	A	A	A	C	A	A	A	C	A	C	A	A	A	A	A	A	A	A	A	A	C	A	A	A	A	A	A	C	C	A	A	C	A	A	M	A	A	A	A
Bn-A02-p19534217	T/C/-	A02	18626360	+	NA	NA	NA	NA	NA	NA	T	T	T	C	T	T	T	C	T	Y	T	T	T	T	-	T	T	T	T	T	C	T	T	T	T	T	T	C	T	T	T	C	T	T	C	T	T	T	T
Bn-A02-p19573867	A/G/-	A02	18678436	+	NA	NA	NA	NA	NA	NA	G	G	A	A	A	A	A	A	R	A	A	G	A	G	A	G	A	A	G	A	A	G	A	G	G	G	G	A	A	G	A	A	G	G	A	G	G	A	A
Bn-A02-p19587812	T/G/-	A02	18698579	+	NA	NA	NA	NA	NA	NA	G	G	T	G	T	T	T	G	K	K	T	G	T	G	K	G	T	T	G	T	G	G	T	G	G	G	G	G	T	G	T	G	G	G	G	G	G	T	T
Bn-A02-p19619823	T/C/-	A02	18733031	+	NA	NA	NA	NA	NA	NA	T	T	C	T	C	C	C	T	Y	Y	C	T	C	T	-	T	C	C	T	C	T	T	C	T	T	T	T	T	C	T	C	T	T	T	-	T	T	T	C
Bn-A02-p19674831	T/C/-	A02	18784335	+	NA	NA	NA	NA	NA	NA	C	C	T	T	T	T	T	T	Y	T	T	C	T	C	T	C	T	T	C	T	T	C	T	C	C	C	C	T	T	C	T	T	C	C	T	C	C	T	T
Bn-A02-p19682273	T/C/-	A02	18791802	+	NA	NA	NA	NA	NA	NA	C	C	C	T	C	C	C	T	C	Y	C	C	C	C	Y	C	C	C	C	C	T	C	C	C	C	C	C	T	C	C	C	T	C	C	-	C	C	C	C
Bn-A02-p19704677	A/C/-	A02	18834371	+	NA	NA	NA	NA	NA	NA	A	A	A	C	A	C	A	C	M	M	A	A	A	A	-	A	A	C	A	A	C	A	A	A	A	A	A	C	A	A	A	C	A	A	M	A	A	A	C
Bn-scaff_18360_1-p1296271	A/C/-	A02	19222715	+	NA	NA	NA	NA	NA	NA	A	A	A	A	A	A	A	C	A	A	A	A	A	A	-	C	A	A	A	A	C	A	A	A	A	A	A	C	A	A	A	A	A	A	C	A	A	A	A
Bn-A02-p20634433	T/C/-	A02	19375269	+	NA	NA	NA	NA	NA	NA	T	T	T	T	T	T	T	C	T	T	T	T	T	T	T	C	T	T	T	T	C	T	T	T	T	T	T	C	T	T	T	T	T	T	T	T	T	T	T
Bn-scaff_15712_6-p470292	T/G/-	A02	19562324	+	NA	NA	NA	NA	NA	NA	G	G	G	G	G	G	-	T	G	G	G	T	G	G	G	G	G	G	G	G	T	T	T	-	G	G	G	G	G	G	T	G	G	G	G	G	G	G	G
Bn-A02-p20371774	T/C/-	A02	19635199	+	NA	NA	NA	NA	NA	NA	T	T	T	T	T	T	T	C	T	T	T	T	T	T	T	C	T	T	T	T	C	T	T	T	T	T	T	T	T	T	T	T	T	T	T	T	T	T	T
Bn-scaff_15712_6-p623654	T/C/-	A02	19660026	+	NA	NA	NA	NA	NA	NA	T	T	T	T	T	T	T	C	T	T	T	T	T	T	T	C	T	T	T	T	C	T	T	T	T	T	T	T	T	T	T	T	T	T	T	T	T	T	T
Bn-A02-p20242753	A/G/-	A02	19738620	+	NA	NA	NA	NA	NA	NA	A	A	A	A	A	A	A	G	A	A	A	A	A	A	A	G	A	A	A	A	G	A	A	A	A	A	A	A	A	A	A	A	A	A	A	A	A	A	A
Bn-A02-p20207870	T/C/-	A02	19776681	+	NA	NA	NA	NA	NA	NA	T	T	T	T	T	T	T	T	T	T	T	T	T	T	T	T	T	T	T	T	T	T	T	T	T	T	T	T	T	T	T	T	T	T	T	T	T	T	T
Bn-A02-p21207148	A/G/-	A02	19823199	+	NA	NA	NA	NA	NA	NA	A	A	A	G	A	A	A	G	A	R	A	A	A	A	A	A	A	A	A	A	G	A	A	A	A	A	A	G	A	A	A	G	A	A	-	A	A	A	A
Bn-A02-p21211198	T/C/-	A02	19827227	+	NA	NA	NA	NA	NA	NA	T	T	T	C	T	T	T	C	T	Y	T	T	T	T	Y	T	T	T	T	T	C	T	T	T	T	T	T	C	T	T	T	C	T	T	Y	T	T	T	T
Bn-A08-p1584455	A/G/-	A02	19947136	+	NA	NA	NA	NA	NA	NA	A	A	A	G	A	A	A	G	A	R	A	A	A	A	R	A	A	A	A	A	G	A	A	A	A	A	A	G	A	A	A	G	A	A	-	A	A	A	A
Bn-A08-p1581891	A/G/-	A02	19949692	+	NA	NA	NA	NA	NA	NA	G	G	G	A	G	G	G	A	G	R	G	G	G	G	G	G	G	G	G	G	A	G	G	G	G	G	G	A	G	G	G	A	G	G	R	G	G	G	G
Bn-A02-p19927952	A/C/-	A02	20223345	+	NA	NA	NA	NA	NA	NA	A	A	A	A	A	A	A	A	A	A	A	A	A	A	A	A	A	A	A	A	A	A	A	A	A	A	A	A	A	A	A	A	A	A	A	A	A	A	A
Bn-A02-p19892433	A/G/-	A02	20258615	+	NA	NA	NA	NA	NA	NA	A	A	A	A	A	A	A	A	A	A	A	A	A	A	A	A	A	A	A	A	A	A	A	A	A	A	A	A	A	A	A	A	A	A	A	A	A	A	A
Bn-A02-p19889192	T/C/-	A02	20262202	+	NA	NA	NA	NA	NA	NA	T	T	T	T	T	T	T	T	T	T	T	T	T	T	T	T	T	T	T	T	T	T	T	T	T	T	T	T	T	T	T	T	T	T	T	T	T	T	T
Bn-A02-p19872956	T/C/-	A02	20278674	+	NA	NA	NA	NA	NA	NA	T	T	T	T	T	T	T	T	T	T	T	T	T	T	T	T	T	T	T	T	T	T	T	T	T	T	T	T	T	T	T	T	T	T	T	T	T	T	T
Bn-A02-p22906797	T/G/-	A02	20427976	+	NA	NA	NA	NA	NA	NA	G	G	G	G	G	G	G	G	G	G	G	G	G	G	G	G	G	G	G	G	G	G	G	G	G	G	G	G	G	G	G	G	G	G	G	G	G	G	G
Bn-A02-p22899292	A/C/-	A02	20435480	+	NA	NA	NA	NA	NA	NA	C	C	C	C	C	C	C	C	C	C	C	C	C	C	C	C	C	C	C	C	C	C	C	C	C	C	C	C	C	C	C	C	C	C	C	C	C	C	C
Bn-A02-p22872607	A/C/-	A02	20460583	+	NA	NA	NA	NA	NA	NA	C	C	C	C	C	C	C	C	C	C	C	C	C	C	C	C	C	C	C	C	C	C	C	C	C	C	C	C	C	C	C	C	C	C	C	C	C	C	C
Bn-A02-p22847472	T/C/-	A02	20485591	+	NA	NA	NA	NA	NA	NA	T	T	T	T	T	T	T	T	T	T	T	T	T	T	T	T	T	T	T	T	T	T	T	T	T	T	T	T	T	T	T	T	T	T	T	T	T	T	T
Bn-A02-p22847040	T/G/-	A02	20486025	+	NA	NA	NA	NA	NA	NA	T	T	T	T	T	T	T	T	T	T	T	T	T	T	T	T	T	T	T	T	T	T	T	T	T	T	T	T	T	T	T	T	T	T	T	T	T	T	T
Bn-A02-p22843446	A/G/-	A02	20489037	+	NA	NA	NA	NA	NA	NA	A	A	A	A	A	A	A	A	A	A	A	A	A	A	A	A	A	A	A	A	A	A	A	A	A	A	A	A	A	A	A	A	A	A	A	A	A	A	A
Bn-A02-p22798107	T/C/-	A02	20535897	+	NA	NA	NA	NA	NA	NA	C	C	T	T	T	T	T	T	T	T	C	C	T	C	T	T	T	T	C	T	T	C	T	C	C	C	C	C	C	C	T	T	C	C	T	C	C	T	C
Bn-Scaffold000270-p11524	A/G/-	A02	20631290	+	NA	NA	NA	NA	NA	NA	G	G	A	A	A	A	A	A	A	A	G	G	A	G	A	A	A	A	G	A	A	G	A	G	G	G	G	G	G	G	A	A	G	G	A	G	G	A	G
Bn-scaff_15712_5-p649917	T/C/-	A02	20655454	+	NA	NA	NA	NA	NA	NA	T	T	T	T	T	C	T	T	T	T	T	T	T	C	C	T	T	T	T	C	T	T	T	T	T	T	T	C	T	C	T	T	T	T	T	T	T	T	T
Bn-A02-p22429563	A/G/-	A02	20741099	+	NA	NA	NA	NA	NA	NA	G	G	G	G	G	G	G	G	G	G	G	G	G	G	G	G	G	G	G	G	G	G	G	G	G	G	G	G	G	G	G	G	G	G	G	G	G	G	G
Bn-A02-p22409779	T/C/-	A02	20756474	+	NA	NA	NA	NA	NA	NA	C	C	C	C	C	C	C	C	C	C	C	C	C	C	C	C	C	C	C	C	C	C	C	C	C	C	C	C	C	C	C	C	C	C	C	C	C	C	C
Bn-A02-p22395060	A/G/-	A02	20766439	+	NA	NA	NA	NA	NA	NA	A	A	A	A	A	A	A	A	A	A	A	A	A	A	A	A	A	A	A	A	A	A	A	A	A	A	A	A	A	A	A	A	A	A	A	A	A	A	A
Bn-A02-p22394632	T/C/-	A02	20766867	+	NA	NA	NA	NA	NA	NA	C	C	C	C	C	C	C	C	C	C	C	C	C	C	C	C	C	C	C	C	C	C	C	C	C	C	C	C	C	C	C	C	C	C	C	C	C	C	C
Bn-A02-p22394284	T/C/-	A02	20767215	+	NA	NA	NA	NA	NA	NA	C	C	C	C	C	C	C	C	C	C	C	C	C	C	C	C	C	C	C	C	C	C	C	C	C	C	C	C	C	C	C	C	C	C	C	C	C	C	C
Bn-A02-p22386317	A/C/-	A02	20775744	+	NA	NA	NA	NA	NA	NA	C	C	C	C	C	C	C	C	C	C	C	C	C	C	C	C	C	C	C	C	C	C	C	C	C	C	C	C	C	C	C	C	C	C	C	C	C	C	C
Bn-A02-p22371956	T/C/-	A02	20787695	+	NA	NA	NA	NA	NA	NA	C	C	C	C	C	C	C	C	C	C	C	C	C	C	C	C	C	C	C	C	C	C	C	C	C	C	C	C	C	C	C	C	C	C	C	C	C	C	C
Bn-A02-p22365337	T/C/-	A02	20793044	+	NA	NA	NA	NA	NA	NA	T	T	T	T	T	-	T	T	T	T	T	T	T	T	T	T	-	T	T	T	T	T	T	T	T	T	-	-	T	T	T	-	T	T	T	T	T	-	-
Bn-A02-p22332961	A/C/-	A02	20818388	+	NA	NA	NA	NA	NA	NA	A	A	A	A	A	A	A	A	A	A	A	A	A	A	A	A	A	A	A	A	A	A	A	A	A	A	A	A	A	A	A	A	A	A	A	A	A	A	A
Bn-A02-p22296426	A/G/-	A02	20862994	+	NA	NA	NA	NA	NA	NA	A	A	A	A	A	A	A	A	A	A	A	A	A	A	A	A	A	A	A	A	A	A	A	A	A	A	A	A	A	A	A	A	A	A	A	A	A	A	A
Bn-A02-p21930156	A/G/-	A02	21226298	+	NA	NA	NA	NA	NA	NA	G	G	G	G	G	G	G	G	G	G	G	G	G	G	G	G	G	G	G	G	G	G	G	G	G	G	G	G	G	G	G	G	G	G	G	G	G	G	G
Bn-A03-p1070680	T/G/-	A02	21520725	+	NA	NA	NA	NA	NA	NA	T	-	G	T	T	T	T	T	T	G	T	T	G	-	T	T	T	T	-	K	T	T	G	T	-	-	T	T	T	G	T	T	T	K	T	-	-	T	T
Bn-A02-p21378450	A/G/-	A02	21741967	+	NA	NA	NA	NA	NA	NA	R	R	G	R	R	R	R	G	R	R	G	R	G	R	G	R	G	G	G	A	G	G	R	R	R	R	R	G	R	R	R	G	G	R	R	R	R	G	G
Bn-A02-p23669898	T/C/-	A02	21870442	+	NA	NA	NA	NA	NA	NA	C	C	C	T	T	T	T	T	T	T	C	C	T	C	C	T	T	T	C	T	T	C	C	C	C	C	C	C	T	C	T	T	C	C	T	C	C	T	C
Bn-A02-p23685036	T/G/-	A02	21882531	+	NA	NA	NA	NA	NA	NA	G	G	G	T	G	T	T	G	T	T	G	G	T	G	G	G	G	T	G	T	G	G	G	G	G	G	G	G	T	G	T	T	G	G	K	G	G	T	G
Bn-A02-p23700858	A/C/-	A02	21892563	+	NA	NA	NA	NA	NA	NA	A	A	A	C	C	C	C	C	C	C	A	A	C	A	M	C	C	C	A	C	C	A	A	A	A	A	A	A	C	A	C	C	A	A	C	A	A	C	A
Bn-scaff_20942_1-p515004	T/G/-	A02	21909942	+	NA	NA	NA	NA	NA	NA	T	T	T	G	T	T	T	T	T	G	T	T	T	T	T	T	T	T	T	T	T	T	T	T	T	T	T	T	T	T	G	G	T	T	T	T	T	T	T
Bn-A02-p23757876	A/G/-	A02	21986982	+	NA	NA	NA	NA	NA	NA	A	-	A	-	G	R	R	G	A	R	A	-	-	A	R	G	G	A	A	A	G	A	R	A	-	-	R	R	A	R	R	R	R	A	G	A	-	G	R
Bn-A02-p23792703	A/G/-	A02	22019005	+	NA	NA	NA	NA	NA	NA	G	G	G	G	G	G	G	G	G	G	G	G	G	G	-	G	G	G	G	G	G	G	G	G	G	G	G	G	G	G	G	G	G	G	G	G	G	A	G
Bn-A02-p23831173	T/C/-	A02	22058109	+	NA	NA	NA	NA	NA	NA	C	C	C	C	C	C	C	C	C	C	C	C	C	C	C	C	C	C	C	T	C	C	T	C	C	C	C	C	C	C	C	C	C	C	C	C	C	C	T
Bn-scaff_17109_1-p548999	A/C/-	A02	22066850	+	NA	NA	NA	NA	NA	NA	A	A	A	A	A	A	A	A	A	A	A	A	A	A	A	A	A	A	A	A	A	A	A	A	A	A	A	A	A	A	A	A	A	A	A	A	A	A	A
Bn-A02-p23835683	A/C/-	A02	22068083	+	NA	NA	NA	NA	NA	NA	M	M	A	A	M	A	A	M	A	A	M	M	A	M	A	A	M	A	M	C	M	A	C	A	A	M	A	A	A	M	A	A	M	M	A	M	M	M	C
Bn-A02-p23856500	T/C/-	A02	22090286	+	NA	NA	NA	NA	NA	NA	C	C	C	C	C	C	C	C	C	C	C	C	C	C	C	C	C	C	C	T	C	C	C	C	C	C	C	C	C	C	C	C	C	C	C	C	C	C	C
Bn-A02-p23889188	A/G/-	A02	22120695	+	NA	NA	NA	NA	NA	NA	A	A	A	A	A	A	A	A	A	A	A	A	A	A	A	A	A	A	A	G	A	A	A	A	A	A	A	A	A	A	A	A	A	A	A	A	A	A	A
Bn-A02-p23897014	A/G/-	A02	22129177	+	NA	NA	NA	NA	NA	NA	A	A	A	A	G	G	A	A	G	A	A	A	A	A	A	A	G	G	A	A	A	A	A	A	A	A	A	A	G	A	A	A	A	A	A	A	A	A	A
Bn-scaff_15918_1-p77494	T/C/-	A02	22242156	+	NA	NA	NA	NA	NA	NA	C	C	T	T	C	T	T	C	T	C	C	C	T	C	C	T	C	T	C	C	C	T	T	T	T	C	T	T	T	C	C	T	C	C	C	C	C	T	T
Bn-A02-p24178094	T/C/-	A02	22406630	+	NA	NA	NA	NA	NA	NA	C	C	C	C	C	C	C	C	C	C	C	C	C	C	C	C	C	C	C	C	C	C	C	C	C	C	C	C	C	C	C	C	C	C	C	C	C	C	C
Bn-scaff_17291_1-p423933	A/G/-	A02	22423310	+	NA	NA	NA	NA	NA	NA	G	G	G	G	G	G	A	G	G	A	A	G	A	G	G	G	G	G	G	R	G	G	G	G	G	G	G	G	G	G	A	A	G	G	A	G	G	G	A
Bn-A02-p24316498	A/G/-	A02	22435606	+	NA	NA	NA	NA	NA	NA	A	A	A	A	A	G	A	A	G	A	A	A	A	A	A	G	A	G	A	A	A	A	G	A	A	A	A	A	A	A	A	A	A	A	A	A	R	A	A
Bn-A02-p24345550	A/C/-	A02	22472050	+	NA	NA	NA	NA	NA	NA	C	C	C	C	C	A	C	C	A	C	C	C	C	C	C	A	C	A	C	C	C	C	-	C	C	C	C	C	C	C	C	C	C	C	C	C	M	C	C
Bn-A02-p24351316	A/C/-	A02	22474819	+	NA	NA	NA	NA	NA	NA	C	C	C	C	C	A	C	C	A	C	C	C	C	C	C	A	C	A	C	C	C	C	A	C	C	C	C	C	C	C	C	C	C	C	C	C	M	C	C
Bn-A02-p24378297	T/G/-	A02	22502529	+	NA	NA	NA	NA	NA	NA	T	T	T	T	T	G	T	T	G	T	T	T	T	T	T	G	T	G	T	T	T	T	G	T	T	T	T	T	T	T	T	T	T	T	T	T	K	T	T
Bn-A02-p24415454	T/G/-	A02	22534260	+	NA	NA	NA	NA	NA	NA	G	G	G	G	G	G	G	G	G	G	G	G	G	G	G	T	G	G	G	G	G	G	G	G	G	G	G	G	G	G	G	G	G	G	G	G	G	G	G
Bn-A02-p24449690	T/G/-	A02	22569686	+	NA	NA	NA	NA	NA	NA	G	G	G	G	G	G	G	G	G	G	G	G	G	G	K	T	G	G	G	G	G	G	G	G	G	G	G	G	G	G	G	G	G	G	G	G	G	G	G
Bn-A02-p24462762	A/G/-	A02	22582493	+	NA	NA	NA	NA	NA	NA	A	A	A	A	A	A	A	A	A	A	A	A	A	A	-	G	A	A	A	A	A	A	A	A	A	A	A	A	A	A	A	A	A	A	A	A	R	A	A
Bn-A02-p24559792	T/C/-	A02	22699841	+	NA	NA	NA	NA	NA	NA	T	T	T	T	T	T	T	T	T	T	T	T	T	T	T	T	T	T	T	T	T	T	T	T	T	T	T	T	T	T	T	T	T	T	T	T	T	T	T
Bn-A02-p24575998	A/G/-	A02	22711756	+	NA	NA	NA	NA	NA	NA	A	A	A	A	A	G	A	A	G	R	A	A	A	A	A	G	A	G	A	A	A	A	G	A	A	A	A	A	A	A	A	A	A	A	A	A	A	A	A
Bn-A02-p24708197	A/G/-	A02	22799519	+	NA	NA	NA	NA	NA	NA	A	A	A	A	A	G	A	A	G	A	G	A	A	A	A	A	A	G	A	A	A	A	G	A	A	A	A	A	A	A	A	A	A	A	A	A	A	A	A
Bn-A02-p24722684	T/C/-	A02	22810424	+	NA	NA	NA	NA	NA	NA	T	T	C	C	T	C	T	C	C	T	C	T	T	T	Y	T	T	C	T	T	C	T	C	T	T	T	T	T	T	T	T	T	T	T	T	T	T	T	T
Bn-A02-p24731379	A/G/-	A02	22820859	+	NA	NA	NA	NA	NA	NA	A	-	G	G	A	G	A	G	G	-	G	A	A	A	R	G	-	G	A	A	G	A	G	A	A	A	A	A	A	A	A	A	A	A	A	A	A	-	A
Bn-scaff_17623_1-p32036	A/G/-	A02	22864476	+	NA	NA	NA	NA	NA	NA	G	G	A	A	G	A	G	A	A	G	G	G	A	G	G	A	G	A	G	G	G	G	G	G	A	R	A	R	A	G	G	A	G	G	G	A	G	G	A
Bn-A02-p24809526	A/C/-	A02	22898350	+	NA	NA	NA	NA	NA	NA	C	C	C	A	C	A	C	C	A	C	A	C	C	C	C	C	C	A	C	C	C	C	A	C	C	C	C	C	C	C	C	C	C	C	C	C	C	C	C
Bn-A02-p24851624	A/G/-	A02	22942172	+	NA	NA	NA	NA	NA	NA	G	G	A	A	G	A	G	A	A	G	A	G	G	G	G	G	G	A	G	G	A	G	A	G	G	G	G	G	G	G	G	G	G	G	G	G	G	G	G
Bn-A02-p24878657	T/G/-	A02	22969033	+	NA	NA	NA	NA	NA	NA	G	G	K	G	G	T	G	K	T	G	G	G	G	G	G	G	G	T	G	G	K	G	T	G	G	G	G	T	G	G	G	G	G	G	G	G	G	G	G
Bn-scaff_17721_1-p758760	A/G/-	A02	22987017	+	NA	NA	NA	NA	NA	NA	A	A	G	G	A	G	A	G	G	A	A	A	A	A	A	G	A	G	A	A	A	A	A	A	G	-	G	-	G	A	A	G	A	A	A	G	A	A	G
Bn-A02-p25100451	T/G/-	A02	23175159	+	NA	NA	NA	NA	NA	NA	T	T	T	T	T	G	T	T	G	T	T	T	T	T	T	T	T	G	T	T	T	T	G	T	T	T	T	T	T	T	T	T	T	T	T	T	T	T	T
Bn-A02-p25118816	A/G/-	A02	23197224	+	NA	NA	NA	NA	NA	NA	A	A	A	A	A	A	G	A	A	A	A	A	A	A	A	A	A	A	A	A	A	A	A	A	A	A	A	A	A	A	A	A	A	A	A	A	A	A	A
Bn-A02-p25174583	T/C/-	A02	23256874	+	NA	NA	NA	NA	NA	NA	C	C	C	C	C	T	C	T	T	C	C	C	C	C	C	C	C	T	C	T	C	C	C	C	C	C	C	C	T	C	C	T	C	C	T	C	C	C	C
Bn-A02-p25181474	A/G/-	A02	23261878	+	NA	NA	NA	NA	NA	NA	A	A	A	A	G	A	G	A	A	R	G	A	G	A	R	G	A	A	A	A	A	A	A	A	A	A	A	A	A	A	A	-	A	A	A	A	A	A	G
Bn-A02-p25181726	A/C/-	A02	23262130	+	NA	NA	NA	NA	NA	NA	C	C	C	C	C	A	C	A	A	A	C	C	A	C	C	A	C	A	C	C	C	C	C	C	C	C	C	A	A	C	C	A	C	C	C	C	C	C	A
Bn-A02-p25190854	T/G/-	A02	23272891	+	NA	NA	NA	NA	NA	NA	T	T	T	T	G	T	G	T	T	T	T	T	G	T	K	G	T	T	T	T	T	T	T	T	T	T	T	T	T	T	T	T	T	T	T	T	T	T	G
Bn-A02-p25201372	A/G/-	A02	23281113	+	NA	NA	NA	NA	NA	NA	A	A	A	A	G	A	G	A	A	R	A	A	G	A	R	G	A	A	A	A	A	A	A	A	A	A	A	A	A	A	A	A	A	A	A	A	A	A	G
Bn-A02-p25205468	T/C/-	A02	23285902	+	NA	NA	NA	NA	NA	NA	T	T	T	T	C	T	C	T	T	Y	T	T	C	T	Y	C	T	T	T	T	T	T	T	T	T	T	T	T	T	T	T	T	T	T	T	T	T	T	C
Bn-A02-p25206495	T/C/-	A02	23295977	+	NA	NA	NA	NA	NA	NA	T	T	T	T	C	T	C	T	T	T	T	T	C	T	Y	C	T	T	T	T	T	T	T	T	T	T	T	T	T	T	T	T	T	T	T	T	T	T	C
Bn-A02-p25216530	A/G/-	A02	23306148	+	NA	NA	NA	NA	NA	NA	A	A	A	A	G	A	A	A	A	A	A	A	G	A	G	G	A	A	A	A	A	A	A	A	A	A	A	A	A	A	A	A	A	A	A	A	A	G	G
Bn-A02-p25218817	T/C/-	A02	23306896	+	NA	NA	NA	NA	NA	NA	C	C	C	C	T	C	T	C	C	Y	C	C	T	C	T	T	C	C	C	C	C	C	C	C	C	C	C	C	C	C	C	C	C	C	C	C	C	T	T
Bn-scaff_17721_1-p221100	A/C/-	A02	23329110	+	NA	NA	NA	NA	NA	NA	C	C	A	-	A	A	C	C	A	C	C	C	A	C	A	A	C	A	C	C	C	C	A	C	C	C	C	C	A	C	C	-	C	C	C	C	C	-	A
Bn-A02-p25334100	T/C/-	A02	23411799	+	NA	NA	NA	NA	NA	NA	C	C	T	T	C	T	T	C	T	Y	C	C	C	C	Y	C	C	T	C	C	C	C	T	C	C	C	C	C	T	C	C	T	C	C	C	C	C	C	C
Bn-A02-p25334271	T/C/-	A02	23411970	+	NA	NA	NA	NA	NA	NA	C	C	T	T	C	T	C	C	T	C	C	C	C	C	C	C	C	T	C	C	C	C	T	C	C	C	C	C	T	C	C	T	C	C	C	C	C	C	C
Bn-scaff_17721_1-p50954	T/C/-	A02	23483816	+	NA	NA	NA	NA	NA	NA	C	C	C	C	C	-	C	T	T	C	C	C	C	C	C	T	C	T	C	C	C	C	C	C	C	C	C	-	T	C	C	-	C	C	C	C	C	C	T
Bn-A02-p25479893	T/C/-	A02	23508290	+	NA	NA	NA	NA	NA	NA	T	T	T	T	C	T	C	T	T	Y	T	T	C	T	T	C	T	T	T	T	T	T	T	T	T	T	T	T	T	T	T	T	T	T	T	T	T	C	C
Bn-A02-p25497743	A/C/-	A02	23529563	+	NA	NA	NA	NA	NA	NA	A	A	A	A	C	A	C	A	A	M	A	A	C	A	A	C	A	A	A	A	A	A	A	A	A	A	A	A	A	A	A	A	A	A	A	A	A	C	C
Bn-A02-p25530111	T/C/-	A02	23545945	+	NA	NA	NA	NA	NA	NA	T	T	T	T	C	T	C	T	T	Y	T	T	C	T	T	C	T	T	T	T	T	T	T	T	T	T	T	T	T	T	T	T	T	T	T	T	T	C	C
Bn-A02-p25530994	A/G/-	A02	23546829	+	NA	NA	NA	NA	NA	NA	A	A	A	A	G	A	G	A	A	R	A	A	G	A	A	G	A	A	A	A	A	A	A	A	A	A	A	A	A	A	A	A	A	A	A	A	A	G	G
Bn-A02-p25564792	A/G/-	A02	23582275	+	NA	NA	NA	NA	NA	NA	A	A	A	A	G	A	G	A	A	A	A	A	G	A	A	G	A	A	A	A	A	A	A	A	A	A	A	A	A	A	A	A	A	A	A	A	A	G	G
Bn-scaff_17177_1-p667432	A/G/-	A02	23633826	+	NA	NA	NA	NA	NA	NA	G	G	G	G	G	G	A	G	G	G	A	G	G	G	G	A	G	G	G	G	A	G	G	G	G	G	G	G	G	G	G	G	G	G	G	G	G	A	G
Bn-A02-p25615285	T/C/-	A02	23644817	+	NA	NA	NA	NA	NA	NA	C	C	C	C	C	C	T	C	C	Y	T	C	C	C	C	T	C	C	C	C	T	C	C	C	C	C	C	C	C	C	C	C	C	C	C	C	C	T	C
Bn-A02-p26154897	T/C/-	A02	23778761	+	NA	NA	NA	NA	NA	NA	T	T	C	T	T	T	T	C	T	Y	T	T	T	T	C	T	Y	T	T	C	T	T	T	T	T	T	T	T	T	T	C	T	T	T	C	T	T	T	C
Bn-A02-p26154951	A/G/-	A02	23778815	+	NA	NA	NA	NA	NA	NA	A	A	R	A	A	A	A	R	A	R	A	A	A	A	G	A	R	A	A	G	A	A	A	A	A	A	A	A	A	A	G	A	A	A	R	A	A	A	R
Bn-A02-p26380384	A/G/-	A02	24093022	+	NA	NA	NA	NA	NA	NA	A	A	A	A	A	A	G	A	A	R	A	A	A	A	A	G	A	A	A	A	A	A	A	A	A	A	A	A	A	A	A	-	A	A	A	A	A	G	A
Bn-A02-p26411585	A/G/-	A02	24128650	+	NA	NA	NA	NA	NA	NA	A	A	A	A	A	A	A	A	A	A	A	A	A	A	A	G	A	A	A	A	A	A	A	A	A	A	A	A	A	A	A	A	A	A	A	A	A	A	A
Bn-A02-p26982864	A/C/-	A02	24298178	+	NA	NA	NA	NA	NA	NA	A	A	A	A	A	A	C	A	A	M	C	A	A	A	A	A	A	A	A	A	A	A	A	A	A	A	A	A	A	A	A	A	A	A	A	A	A	A	A
Bn-A02-p27022909	A/C/-	A02	24330966	+	NA	NA	NA	NA	NA	NA	C	C	C	A	A	A	A	C	A	M	C	A	A	A	A	A	M	A	C	A	C	A	A	A	C	C	C	C	A	C	A	A	A	C	A	C	C	C	C
Bn-A02-p27024443	T/C/-	A02	24332799	+	NA	NA	NA	NA	NA	NA	C	C	C	T	T	T	T	C	T	T	C	T	T	T	T	T	Y	T	C	T	C	T	T	T	C	C	C	C	T	C	T	T	T	C	T	C	C	C	C
Bn-A02-p27052742	T/G/-	A02	24374599	+	NA	NA	NA	NA	NA	NA	T	T	T	G	G	G	G	T	G	K	T	T	G	T	G	G	K	G	T	G	T	T	T	T	T	T	T	T	G	T	G	G	T	T	G	T	T	T	T
Bn-scaff_16139_1-p1074318	A/C/-	A02	24432506	+	NA	NA	NA	NA	NA	NA	A	A	C	A	C	A	C	C	A	M	A	A	C	A	C	A	M	A	C	A	C	A	A	A	A	A	A	C	A	A	A	A	A	A	C	A	A	C	C
Bn-A02-p27110006	A/G/-	A02	24434713	+	NA	NA	NA	NA	NA	NA	A	A	G	A	G	A	G	G	A	R	A	A	G	A	G	A	R	A	G	A	G	A	A	A	A	A	A	G	A	A	A	A	A	A	G	A	A	G	G
Bn-A02-p27149778	T/C/-	A02	24468464	+	NA	NA	NA	NA	NA	NA	T	T	C	T	C	T	T	C	T	Y	T	T	C	T	C	T	Y	T	C	T	C	T	T	T	T	T	T	C	T	T	T	T	T	T	C	T	T	C	C
Bn-A02-p27179350	T/G/-	A02	24495095	+	NA	NA	NA	NA	NA	NA	G	G	T	G	T	G	T	T	G	G	G	G	T	G	T	T	T	G	T	T	T	G	G	G	G	G	G	T	G	G	T	T	G	G	T	G	G	T	T
Bn-A02-p27180049	A/G/-	A02	24495808	+	NA	NA	NA	NA	NA	NA	A	A	G	A	G	A	G	G	A	A	A	A	G	A	G	G	G	A	G	G	G	A	A	A	A	A	A	G	A	A	G	G	A	A	G	A	A	G	G
Bn-A02-p27203061	A/G/-	A02	24526396	+	NA	NA	NA	NA	NA	NA	G	G	A	G	A	G	A	A	G	G	G	A	A	G	A	A	A	G	A	A	A	A	A	A	G	G	G	A	G	G	A	A	A	G	A	G	G	A	A
Bn-A02-p27215745	T/G/-	A02	24541029	+	NA	NA	NA	NA	NA	NA	G	G	T	G	T	G	T	T	G	G	G	T	T	G	T	T	T	G	T	T	T	T	T	T	G	G	G	T	G	G	T	T	T	G	T	G	G	T	T
Bn-A02-p27226579	A/G/-	A02	24551863	+	NA	NA	NA	NA	NA	NA	G	G	G	G	G	G	G	G	G	R	G	G	G	G	G	G	G	G	G	G	G	G	G	G	G	G	G	G	G	G	G	G	G	G	G	G	G	G	G
Bn-A02-p27245861	A/G/-	A02	24567493	+	NA	NA	NA	NA	NA	NA	G	G	G	G	G	G	A	G	G	R	G	G	G	G	G	G	G	G	A	G	A	G	G	G	G	G	G	G	G	G	G	G	G	G	G	G	G	G	G
Bn-A02-p27327804	A/C/-	A02	24623285	+	NA	NA	NA	NA	NA	NA	C	C	C	A	C	A	C	C	A	C	C	C	C	C	C	C	C	A	C	C	C	C	C	C	C	C	C	C	A	C	C	C	C	C	C	C	C	C	C
Bn-A02-p27336483	T/C/-	A02	24633305	+	NA	NA	NA	NA	NA	NA	T	T	T	C	T	C	T	T	C	Y	T	T	T	T	T	T	T	C	T	T	T	T	T	T	T	T	T	T	C	T	T	T	T	T	T	T	T	T	T
Bn-A02-p27743910	A/G/-	A02	24724645	+	NA	NA	NA	NA	NA	NA	G	G	G	A	G	A	A	G	A	G	A	G	G	G	G	A	R	A	G	A	G	G	G	G	G	G	G	G	A	G	A	A	G	G	A	G	G	A	G
Bn-A02-p27792444	T/C/-	A02	24751608	+	NA	NA	NA	NA	NA	NA	T	T	T	T	T	T	T	T	T	T	T	T	T	T	T	T	T	T	T	T	T	T	T	T	T	T	T	T	T	T	T	T	T	T	T	T	T	T	T
Bn-A03-p187017	A/C/-	A03	379	+	NA	NA	NA	NA	NA	NA	C	C	C	C	C	C	C	C	C	C	C	C	C	C	C	C	C	C	C	C	C	C	C	C	C	C	C	C	C	C	C	C	C	C	C	C	C	C	C
Bn-A03-p23899	T/G/-	A03	6731	+	NA	NA	NA	NA	NA	NA	K	T	T	K	T	T	G	G	K	G	G	K	G	K	T	G	K	G	K	K	G	T	T	K	K	K	G	K	T	G	G	T	K	K	K	K	K	K	K
Bn-A03-p312762	A/G/-	A03	11843	+	NA	NA	NA	NA	NA	NA	G	G	G	R	G	G	A	G	G	G	A	R	R	G	G	G	G	A	G	R	R	G	G	G	G	G	G	G	G	R	A	G	R	R	A	G	G	A	G
Bn-A03-p298309	T/C/-	A03	28360	+	NA	NA	NA	NA	NA	NA	T	T	T	T	T	T	T	T	T	T	T	T	T	T	T	T	T	T	T	T	T	T	T	T	T	T	T	T	T	T	T	T	T	T	T	T	T	T	T
Bn-A03-p262793	T/C/-	A03	51571	+	NA	NA	NA	NA	NA	NA	T	T	C	Y	C	C	T	T	T	T	T	T	T	Y	C	T	T	T	T	T	T	C	C	T	T	T	T	T	T	T	T	C	T	T	T	T	T	T	C
Bn-A03-p203000	A/G/-	A03	76881	+	NA	NA	NA	NA	NA	NA	R	R	G	R	G	G	A	A	R	A	A	R	R	R	G	A	R	A	R	R	A	G	G	R	R	R	A	A	R	R	A	G	R	R	R	R	R	A	G
Bn-scaff_16614_1-p1892380	A/C/-	A03	93955	+	NA	NA	NA	NA	NA	NA	A	A	A	A	A	A	C	C	A	C	C	A	C	A	A	C	A	C	A	A	C	A	A	A	A	A	C	C	A	A	C	A	A	A	A	A	A	C	A
Bn-A03-p90436	A/G/-	A03	99592	+	NA	NA	NA	NA	NA	NA	R	A	A	A	A	A	A	G	R	A	A	A	A	R	A	-	R	A	R	A	R	A	A	A	R	R	G	R	A	A	A	A	R	R	A	R	R	A	A
Bn-A03-p141681	T/C/-	A03	148643	+	NA	NA	NA	NA	NA	NA	T	T	T	T	T	T	T	C	T	T	T	T	T	T	T	C	T	T	T	T	T	T	T	T	T	T	C	C	T	T	T	T	T	T	T	T	T	T	T
Bn-A03-p927517	T/C/-	A03	231067	+	NA	NA	NA	NA	NA	NA	C	C	C	C	T	T	C	T	T	T	C	C	C	C	C	T	T	C	C	C	C	C	C	T	C	C	C	T	C	C	C	T	T	C	C	C	C	C	C
Bn-A03-p928009	T/C/-	A03	231559	+	NA	NA	NA	NA	NA	NA	Y	-	T	Y	C	C	T	C	C	C	T	T	T	Y	Y	C	C	T	Y	T	Y	Y	T	C	Y	Y	Y	C	Y	T	C	C	C	T	Y	Y	Y	Y	T
Bn-A03-p928274	A/G/-	A03	231866	+	NA	NA	NA	NA	NA	NA	G	G	G	G	A	A	G	G	R	G	G	-	G	G	R	G	G	G	G	G	G	G	G	G	G	G	G	G	G	G	G	A	G	G	G	G	G	G	G
Bn-A03-p1218291	T/C/-	A03	249013	+	NA	NA	NA	NA	NA	NA	T	T	T	T	T	T	T	T	T	T	T	C	C	T	T	T	T	T	T	C	T	T	T	T	T	T	T	T	T	T	T	T	T	T	Y	T	T	C	T
Bn-A03-p334010	A/C/-	A03	255421	+	NA	NA	NA	NA	NA	NA	A	A	A	A	A	A	A	A	A	A	A	A	A	A	A	A	A	A	A	A	A	A	A	A	A	A	A	A	A	A	A	A	A	A	A	A	A	A	A
Bn-A03-p1089875	T/C/-	A03	256176	+	NA	NA	NA	NA	NA	NA	T	T	T	T	T	T	T	T	T	T	T	-	T	T	T	T	T	T	T	T	T	T	T	T	T	T	T	T	T	T	T	T	T	T	T	T	T	Y	T
Bn-A03-p1238329	A/G/-	A03	326598	+	NA	NA	NA	NA	NA	NA	R	R	G	A	A	A	G	A	A	A	G	G	R	R	G	A	A	A	R	R	A	G	G	A	R	R	R	A	R	G	G	A	R	R	-	R	R	G	A
Bn-A03-p471570	A/G/-	A03	373818	+	NA	NA	NA	NA	NA	NA	-	G	G	G	G	G	A	A	G	A	A	R	G	G	G	A	G	A	G	G	A	G	G	G	G	G	A	G	G	G	G	-	G	G	A	G	G	A	A
Bn-A03-p1514927	A/C/-	A03	384402	+	NA	NA	NA	NA	NA	NA	A	A	A	A	A	A	C	A	A	A	C	A	C	A	A	A	M	A	A	M	A	A	A	A	A	A	A	A	A	A	A	A	A	A	A	A	A	A	A
Bn-A03-p1532114	T/G/-	A03	402048	+	NA	NA	NA	NA	NA	NA	G	G	G	G	G	G	T	G	G	-	T	K	T	G	G	G	T	G	G	T	G	G	G	G	G	G	G	G	G	G	G	G	G	G	K	G	G	G	G
Bn-A03-p1538555	T/C/-	A03	408493	+	NA	NA	NA	NA	NA	NA	T	T	T	Y	T	C	T	Y	C	C	T	T	T	Y	T	T	Y	T	Y	T	Y	T	T	T	T	T	T	T	T	T	T	C	Y	Y	T	T	T	C	T
Bn-A03-p528276	T/C/-	A03	419937	+	NA	NA	NA	NA	NA	NA	Y	Y	T	T	T	T	C	C	Y	C	C	Y	T	Y	T	C	Y	C	Y	-	C	T	T	T	Y	Y	C	T	Y	Y	T	T	Y	Y	C	Y	Y	C	C
Bn-A03-p537905	T/G/-	A03	430986	+	NA	NA	NA	NA	NA	NA	K	K	T	T	T	T	T	G	K	G	T	K	T	K	T	G	K	T	K	T	K	T	T	T	K	K	G	T	K	T	T	T	K	K	K	K	K	T	T
Bn-A03-p1652490	A/C/-	A03	438747	+	NA	NA	NA	NA	NA	NA	M	A	A	A	C	C	C	M	M	C	C	M	C	A	C	C	A	C	A	C	M	A	A	A	A	M	-	C	A	A	A	C	A	A	M	A	A	C	A
Bn-A03-p1711856	A/C/-	A03	442728	+	NA	NA	NA	NA	NA	NA	M	M	A	M	A	C	A	M	C	A	A	A	C	M	C	C	M	M	M	-	M	A	A	A	M	M	M	A	M	M	A	C	M	M	M	M	M	C	A
Bn-A03-p1698016	T/C/-	A03	456456	+	NA	NA	NA	NA	NA	NA	Y	Y	C	Y	C	T	C	C	Y	T	C	C	Y	C	T	T	Y	Y	C	Y	C	C	C	C	Y	Y	Y	C	Y	Y	C	T	C	Y	-	Y	Y	T	C
Bn-A03-p4096019	A/G/-	A03	523629	+	NA	NA	NA	NA	NA	NA	G	A	G	G	G	G	A	G	G	A	A	G	A	A	A	G	G	A	G	G	G	G	G	G	G	G	A	G	G	A	G	G	A	G	A	G	G	A	A
Bn-A03-p630979	T/C/-	A03	553192	+	NA	NA	NA	NA	NA	NA	C	C	C	C	T	T	C	C	Y	C	C	C	T	C	C	C	C	C	C	Y	C	C	C	C	C	C	C	C	C	C	C	T	C	C	C	C	C	C	C
Bn-A03-p4036196	T/C/-	A03	588892	+	NA	NA	NA	NA	NA	NA	T	T	T	T	T	T	T	T	T	C	C	T	T	T	T	T	T	C	T	T	T	T	T	T	T	T	T	T	T	T	T	T	T	T	T	T	T	T	T
Bn-A03-p755100	A/G/-	A03	623349	+	NA	NA	NA	NA	NA	NA	G	G	A	G	A	A	A	G	G	G	A	A	A	G	A	G	R	A	G	A	G	A	A	A	G	G	G	A	G	A	A	A	R	G	A	G	G	A	A
Bn-A03-p766322	A/G/-	A03	634572	+	NA	NA	NA	NA	NA	NA	G	G	G	G	G	G	G	G	G	G	G	-	R	G	R	G	G	G	G	R	G	R	G	R	G	G	G	G	G	G	G	G	G	G	G	G	G	G	G
Bn-A04-p15710186	A/G/-	A03	638518	+	NA	NA	NA	NA	NA	NA	A	R	A	G	A	G	A	G	G	A	G	A	G	A	A	A	G	G	A	A	A	A	A	A	R	G	R	A	A	A	A	A	A	A	A	A	A	G	A
Bn-A03-p7588123	A/C/-	A03	678616	+	NA	NA	NA	NA	NA	NA	C	C	C	-	C	A	C	C	C	-	C	C	C	C	A	C	C	C	C	C	C	C	C	C	C	C	C	C	C	C	C	A	C	C	A	C	C	C	C
Bn-A03-p7597598	T/C/-	A03	687247	+	NA	NA	NA	NA	NA	NA	T	T	T	-	T	C	T	T	T	T	T	T	T	T	C	T	T	C	T	T	T	T	T	T	T	T	T	T	T	T	T	C	T	T	C	T	T	T	T
Bn-A03-p8585196	A/G/-	A03	695062	+	NA	NA	NA	NA	NA	NA	G	G	G	G	G	G	G	G	G	G	G	G	A	G	G	G	G	A	G	G	G	G	G	G	G	G	G	G	G	G	A	G	G	G	G	G	G	G	G
Bn-A03-p8218946	T/C/-	A03	702813	+	NA	NA	NA	NA	NA	NA	C	C	C	T	C	T	T	T	T	T	C	T	C	C	T	T	T	C	C	C	T	Y	C	T	C	C	C	T	C	C	T	T	T	C	-	C	C	T	C
Bn-A03-p8217276	A/G/-	A03	704494	+	NA	NA	NA	NA	NA	NA	G	G	G	R	G	G	A	A	A	A	G	A	A	G	G	A	A	G	G	A	A	R	G	A	G	G	G	A	G	G	A	A	A	G	A	G	G	A	G
Bn-A03-p830116	A/C/-	A03	707629	+	NA	NA	NA	NA	NA	NA	A	A	A	A	A	A	A	A	A	A	A	-	A	A	A	A	A	A	A	A	A	A	A	A	A	A	A	A	A	A	C	A	A	A	M	A	A	A	A
Bn-A03-p8206961	A/G/-	A03	715042	+	NA	NA	NA	NA	NA	NA	A	A	A	G	A	A	G	G	G	-	A	G	A	A	A	G	G	G	A	A	G	R	A	G	A	A	A	G	A	A	G	G	G	A	R	A	A	G	A
Bn-A03-p9124799	A/G/-	A03	728544	+	NA	NA	NA	NA	NA	NA	A	A	A	-	A	G	A	A	A	R	A	A	A	A	A	A	A	A	G	A	A	G	A	G	A	A	A	A	A	A	A	A	G	A	A	A	A	A	A
Bn-A03-p9123542	T/G/-	A03	729816	+	NA	NA	NA	NA	NA	NA	T	T	T	K	T	G	T	T	T	K	T	T	T	T	T	T	T	T	G	T	T	G	T	G	T	T	T	T	T	T	T	T	G	T	T	T	T	T	T
Bn-A03-p9115020	T/C/-	A03	740134	+	NA	NA	NA	NA	NA	NA	C	C	C	C	C	T	C	C	C	C	C	C	C	C	C	C	C	C	T	C	C	T	C	T	C	C	C	C	C	C	C	C	T	C	C	C	C	T	C
Bn-A03-p9819389	T/C/-	A03	755348	+	NA	NA	NA	NA	NA	NA	T	T	T	T	T	T	C	T	T	Y	T	T	T	T	T	T	T	T	C	T	T	T	T	T	T	T	T	T	T	T	T	T	T	T	T	T	T	T	T
Bn-A03-p9627365	A/C/-	A03	766116	+	NA	NA	NA	NA	NA	NA	A	A	A	A	A	C	A	A	M	M	A	A	A	M	A	A	A	C	A	A	A	C	A	C	A	A	A	A	A	A	A	A	A	A	A	A	A	A	A
Bn-A03-p9626063	A/C/-	A03	770020	+	NA	NA	NA	NA	NA	NA	C	C	C	C	C	A	C	C	M	C	C	C	C	C	C	C	C	A	C	C	C	C	C	C	C	C	C	C	C	C	C	C	C	C	C	C	C	C	C
Bn-A03-p9618630	T/C/-	A03	774108	+	NA	NA	NA	NA	NA	NA	T	T	T	T	T	C	T	T	Y	T	T	T	T	T	T	T	T	T	T	T	T	T	T	T	T	T	T	T	T	T	T	T	T	T	T	T	T	T	T
Bn-A03-p951365	A/G/-	A03	785956	+	NA	NA	NA	NA	NA	NA	G	G	G	G	G	G	G	G	G	G	G	R	G	G	G	G	G	G	G	G	G	G	G	G	G	G	G	G	G	G	G	G	G	G	G	G	G	G	G
Bn-A03-p9605319	T/C/-	A03	787447	+	NA	NA	NA	NA	NA	NA	T	T	T	T	C	T	C	T	T	T	T	T	C	T	T	T	T	T	T	T	T	T	C	T	T	T	T	T	T	T	T	C	T	T	T	T	T	C	T
Bn-A03-p955176	T/G/-	A03	789737	+	NA	NA	NA	NA	NA	NA	G	G	G	G	G	G	G	G	G	T	G	G	G	G	G	G	K	G	G	G	G	K	G	T	G	G	G	T	G	G	G	G	G	G	K	G	G	G	G
Bn-A03-p9602074	A/C/-	A03	790692	+	NA	NA	NA	NA	NA	NA	C	C	C	C	C	C	C	C	C	M	C	C	C	C	C	C	C	C	C	C	C	C	C	C	C	C	C	C	C	C	C	C	C	C	C	C	C	C	C
Bn-A03-p9601581	A/G/-	A03	791185	+	NA	NA	NA	NA	NA	NA	A	A	A	A	A	A	A	A	A	R	A	A	A	R	A	A	A	A	G	A	A	G	A	G	A	A	A	A	A	A	A	A	A	A	R	A	A	G	A
Bn-A03-p991949	T/C/-	A03	830738	+	NA	NA	NA	NA	NA	NA	Y	Y	T	Y	C	C	Y	C	C	C	C	-	T	Y	T	C	C	T	Y	T	Y	Y	T	C	Y	Y	Y	C	Y	T	C	C	C	Y	Y	Y	Y	C	T
Bn-A03-p10248162	T/G/-	A03	839735	+	NA	NA	NA	NA	NA	NA	G	G	T	G	G	G	G	G	K	G	T	G	G	G	G	G	G	G	G	G	G	T	G	T	K	T	G	G	G	G	G	G	G	G	G	T	T	G	G
Bn-A03-p1008445	A/G/-	A03	845125	+	NA	NA	NA	NA	NA	NA	G	G	G	G	A	A	G	G	R	G	G	G	G	G	G	G	R	G	G	G	G	R	G	A	G	G	G	A	G	G	G	A	R	G	G	G	G	G	G
Bn-A03-p10900301	T/C/-	A03	903717	+	NA	NA	NA	NA	NA	NA	T	T	T	C	T	T	T	Y	C	Y	C	T	T	C	T	T	T	T	T	T	T	T	T	T	T	C	T	C	C	T	T	T	T	T	T	C	C	T	T
Bn-scaff_22466_1-p106418	T/C/-	A03	905683	+	NA	NA	NA	NA	NA	NA	C	C	C	T	C	C	C	C	C	-	T	C	C	T	C	C	C	C	C	C	C	C	C	C	C	T	C	C	T	C	C	C	C	C	C	T	T	C	C
Bn-A03-p10912453	T/G/-	A03	913767	+	NA	NA	NA	NA	NA	NA	T	T	T	T	T	T	T	T	T	T	T	T	T	T	T	T	T	T	T	T	T	T	T	T	T	T	T	T	T	T	T	T	T	T	T	T	T	T	T
Bn-A03-p10912815	T/C/-	A03	914130	+	NA	NA	NA	NA	NA	NA	C	C	C	T	C	C	C	Y	T	Y	T	C	C	T	C	C	C	T	C	C	C	C	C	C	-	T	C	T	T	C	C	C	C	C	C	T	T	C	C
Bn-A03-p10930541	T/C/-	A03	924586	+	NA	NA	NA	NA	NA	NA	C	C	C	C	C	C	C	C	C	C	C	C	C	C	C	C	C	C	C	C	C	C	C	C	C	C	C	C	C	C	C	C	C	C	C	C	C	C	C
Bn-A03-p1308820	A/G/-	A03	945040	+	NA	NA	NA	NA	NA	NA	A	A	A	A	A	A	A	A	A	A	A	R	A	A	A	A	A	A	A	A	A	A	A	A	A	A	A	A	A	A	A	A	A	A	A	A	A	R	A
Bn-A03-p22065637	A/G/-	A03	974908	+	NA	NA	NA	NA	NA	NA	A	A	G	A	G	G	A	A	G	A	A	A	A	A	A	R	A	A	A	A	A	A	A	A	A	A	A	A	A	A	A	A	A	A	A	A	A	A	A
Bn-A03-p1352996	T/G/-	A03	986708	+	NA	NA	NA	NA	NA	NA	K	K	T	G	G	G	G	G	G	G	G	T	G	K	T	G	G	G	K	G	G	T	T	G	K	K	K	G	K	T	T	G	G	-	K	K	K	K	G
Bn-A03-p1353309	T/G/-	A03	987017	+	NA	NA	NA	NA	NA	NA	K	K	G	T	T	T	T	T	T	T	T	G	T	K	G	T	T	T	K	T	T	G	G	T	K	K	K	T	K	G	G	T	T	K	-	K	K	K	T
Bn-A03-p12286718	A/G/-	A03	996716	+	NA	NA	NA	NA	NA	NA	G	G	G	G	G	G	G	G	G	A	A	G	A	G	G	G	G	G	A	G	G	G	G	G	A	A	G	G	A	G	G	G	G	A	G	A	A	G	G
Bn-A03-p12308276	A/G/-	A03	1002068	+	NA	NA	NA	NA	NA	NA	A	A	A	A	A	A	A	A	A	G	G	A	G	A	A	A	A	A	G	A	A	A	A	A	G	G	A	A	G	A	A	A	A	G	A	G	G	A	A
Bn-A03-p12308737	T/C/-	A03	1002493	+	NA	NA	NA	NA	NA	NA	T	T	T	T	T	T	T	T	T	C	C	T	C	T	T	T	T	T	C	T	T	T	T	T	C	C	T	T	C	T	T	T	T	C	T	C	C	T	T
Bn-A03-p13335946	A/G/-	A03	1034386	+	NA	NA	NA	NA	NA	NA	G	G	A	G	G	G	G	G	G	A	G	G	A	G	G	G	G	A	G	A	G	G	G	G	G	G	G	G	G	G	G	G	G	G	G	G	G	G	G
Bn-A03-p13335275	A/G/-	A03	1035065	+	NA	NA	NA	NA	NA	NA	R	G	A	G	G	G	R	G	G	A	R	R	A	R	R	R	R	A	R	A	R	R	G	R	-	G	R	R	-	R	G	R	R	R	R	G	G	G	G
Bn-A03-p1435886	A/G/-	A03	1066350	+	NA	NA	NA	NA	NA	NA	A	A	A	R	G	G	G	G	G	G	G	R	G	R	A	A	R	G	R	G	G	A	A	A	A	A	A	G	A	A	A	G	R	R	R	A	A	G	A
Bn-A03-p13585261	T/C/-	A03	1075613	+	NA	NA	NA	NA	NA	NA	C	C	T	C	C	C	C	C	C	C	T	C	T	C	Y	C	Y	T	T	C	C	C	C	C	T	T	Y	C	T	C	C	T	C	T	C	T	T	T	C
Bn-A03-p14209971	T/C/-	A03	1088785	+	NA	NA	NA	NA	NA	NA	C	C	T	T	T	C	T	C	Y	T	T	T	C	C	C	T	-	C	T	T	T	T	T	T	T	T	-	T	T	C	T	T	T	T	T	T	C	T	T
Bn-A03-p1488306	A/G/-	A03	1115031	+	NA	NA	NA	NA	NA	NA	A	A	A	A	A	A	G	A	A	A	G	A	G	A	A	A	A	A	A	R	A	A	A	A	A	A	A	A	A	A	A	A	A	A	A	A	A	A	A
Bn-A03-p15184379	T/C/-	A03	1131133	+	NA	NA	NA	NA	NA	NA	C	C	T	C	C	C	C	C	C	C	T	C	C	C	C	C	C	C	C	C	C	C	C	C	C	C	C	C	C	C	C	C	C	C	C	C	C	C	C
Bn-A03-p1507769	A/G/-	A03	1132330	+	NA	NA	NA	NA	NA	NA	A	A	A	A	A	A	G	A	A	A	G	-	G	A	A	A	R	A	A	R	A	A	A	A	A	A	A	A	A	A	A	A	A	A	A	A	A	A	A
Bn-A03-p15200901	A/G/-	A03	1148919	+	NA	NA	NA	NA	NA	NA	A	A	A	A	A	A	A	A	A	A	A	A	A	A	A	A	A	A	A	A	A	A	A	A	A	A	A	A	A	A	A	A	A	A	A	A	A	-	A
Bn-A03-p16098207	T/C/-	A03	1154972	+	NA	NA	NA	NA	NA	NA	C	C	C	T	C	C	T	T	T	C	C	T	C	T	C	C	Y	T	Y	T	T	Y	C	C	C	C	C	C	C	C	C	C	T	C	C	C	C	C	C
Bn-scaff_17298_1-p13882	T/C/-	A03	1156597	+	NA	NA	NA	NA	NA	NA	T	T	T	T	T	T	T	T	T	T	C	T	T	T	T	T	C	T	T	C	T	T	T	T	T	T	T	T	T	T	C	T	T	T	T	T	T	T	T
Bn-A03-p16969084	T/C/-	A03	1161837	+	NA	NA	NA	NA	NA	NA	T	T	T	T	T	T	T	T	T	T	T	T	T	T	T	T	T	T	T	T	T	T	T	T	T	T	T	T	T	T	T	T	T	T	T	T	T	T	T
Bn-scaff_17298_1-p1520465	T/G/-	A03	1163596	+	NA	NA	NA	NA	NA	NA	T	T	T	T	T	T	T	T	T	T	T	T	T	T	T	T	T	T	T	T	T	T	T	T	T	T	T	T	T	T	T	T	T	T	T	T	T	T	T
Bn-A03-p1577561	T/C/-	A03	1197534	+	NA	NA	NA	NA	NA	NA	C	C	C	C	C	C	T	C	C	C	-	-	Y	C	C	C	C	C	C	Y	C	C	C	C	C	C	C	C	C	C	C	C	C	C	C	C	C	C	C
Bn-A03-p1596091	A/G/-	A03	1216023	+	NA	NA	NA	NA	NA	NA	A	A	A	A	A	A	G	A	A	A	G	R	G	A	A	A	R	A	A	R	A	A	A	A	A	A	A	A	A	A	A	A	A	A	-	A	A	A	A
Bn-scaff_16092_1-p671925	T/C/-	A03	1234075	+	NA	NA	NA	NA	NA	NA	C	C	C	C	C	C	C	C	C	C	C	C	C	C	C	C	C	C	C	C	C	C	C	C	C	C	C	C	C	C	C	C	C	C	C	C	C	C	C
Bn-scaff_16092_1-p671871	A/C/-	A03	1234129	+	NA	NA	NA	NA	NA	NA	A	A	A	C	A	A	A	A	A	-	A	A	C	A	A	A	A	A	A	C	A	C	A	C	A	A	A	C	A	A	A	C	A	A	C	A	A	A	A
Bn-A03-p19344007	T/C/-	A03	1234981	+	NA	NA	NA	NA	NA	NA	T	T	T	C	T	T	T	T	T	Y	T	T	C	T	T	T	T	T	T	C	T	C	T	C	T	T	T	C	T	T	T	C	T	T	C	T	T	T	T
Bn-A03-p19274997	T/C/-	A03	1239182	+	NA	NA	NA	NA	NA	NA	T	T	T	T	C	C	C	T	C	T	C	Y	T	T	C	Y	T	T	T	T	C	T	T	T	T	T	T	T	T	T	C	T	T	T	T	T	T	T	C
Bn-A03-p1639446	T/C/-	A03	1256811	+	NA	NA	NA	NA	NA	NA	T	T	T	T	C	T	C	-	T	T	C	Y	-	T	T	T	T	C	T	C	-	T	T	T	T	T	T	C	T	T	T	T	T	T	T	T	T	T	T
Bn-Scaffold000906-p1518	T/C/-	A03	1353372	+	NA	NA	NA	NA	NA	NA	Y	Y	T	Y	C	C	T	C	C	T	T	T	C	Y	C	C	Y	C	Y	C	C	T	T	T	Y	Y	Y	C	C	Y	T	C	C	Y	Y	Y	Y	C	C
Bn-A03-p1755651	A/G/-	A03	1354996	+	NA	NA	NA	NA	NA	NA	R	A	A	A	G	G	A	G	G	A	A	A	G	A	G	G	A	G	A	R	G	A	A	A	A	A	R	G	G	A	A	G	G	A	A	A	A	G	G
Bn-A03-p19832980	T/G/-	A03	1359352	+	NA	NA	NA	NA	NA	NA	G	G	G	T	G	T	G	G	G	G	G	K	G	G	T	K	G	G	G	T	T	G	G	G	G	G	G	T	G	G	G	G	G	G	G	G	G	G	G
Bn-A03-p1762980	A/G/-	A03	1359390	+	NA	NA	NA	NA	NA	NA	G	G	G	G	G	G	A	G	G	G	A	G	G	G	G	G	G	G	G	G	G	G	G	G	G	G	G	G	G	G	G	G	G	G	G	G	G	G	G
Bn-A03-p19874058	A/G/-	A03	1367146	+	NA	NA	NA	NA	NA	NA	G	G	G	A	A	-	R	G	G	G	R	G	G	G	-	G	G	G	G	R	G	G	G	G	G	G	G	-	G	G	G	G	G	G	G	G	G	G	G
Bn-A03-p19868485	T/C/-	A03	1373816	+	NA	NA	NA	NA	NA	NA	T	T	T	Y	C	C	C	T	T	Y	Y	T	T	T	C	T	T	T	T	C	T	T	T	T	T	T	T	C	T	T	T	T	T	T	T	T	T	T	T
Bn-A03-p19542946	A/G/-	A03	1382516	+	NA	NA	NA	NA	NA	NA	A	A	A	A	A	A	A	A	A	A	A	A	A	A	A	A	A	A	A	A	A	A	A	A	A	A	A	A	A	A	A	A	A	A	A	A	A	A	A
Bn-A03-p1817556	A/G/-	A03	1417854	+	NA	NA	NA	NA	NA	NA	G	G	G	G	A	G	A	A	G	G	A	R	G	G	G	G	G	A	G	G	A	G	G	G	G	G	G	A	G	G	G	G	G	G	G	G	G	G	G
Bn-A03-p1839932	T/G/-	A03	1448487	+	NA	NA	NA	NA	NA	NA	T	T	T	T	G	T	G	T	T	G	G	-	T	T	T	T	T	T	T	T	T	T	T	T	T	T	T	G	T	T	T	T	T	T	T	T	T	T	T
Bn-A03-p22238801	T/C/-	A03	1462977	+	NA	NA	NA	NA	NA	NA	T	T	C	C	C	C	T	C	C	C	T	T	T	T	C	Y	T	T	T	C	C	T	T	T	T	T	Y	T	C	T	T	C	T	C	T	C	C	T	T
Bn-A03-p22237846	A/G/-	A03	1463932	+	NA	NA	NA	NA	NA	NA	G	G	A	A	A	A	G	A	A	A	G	G	G	G	A	R	G	G	G	A	A	G	G	G	G	G	R	G	A	G	G	A	G	A	G	A	A	G	G
Bn-A03-p22744766	T/C/-	A03	1506103	+	NA	NA	NA	NA	NA	NA	C	C	C	C	C	T	C	C	T	C	C	C	C	C	C	Y	C	C	C	C	C	C	C	C	C	C	C	C	C	C	C	C	C	C	C	C	C	C	C
Bn-A03-p1894119	T/C/-	A03	1506532	+	NA	NA	NA	NA	NA	NA	T	T	T	Y	C	T	T	Y	T	C	C	Y	T	T	T	T	T	C	T	T	Y	T	T	T	T	T	T	C	T	T	C	T	T	T	Y	T	T	T	T
Bn-A03-p1899032	T/C/-	A03	1511508	+	NA	NA	NA	NA	NA	NA	C	C	C	C	T	C	C	Y	C	T	T	Y	C	C	C	C	Y	T	C	C	Y	C	C	C	C	C	C	T	C	C	T	C	C	C	Y	C	C	C	C
Bn-A03-p1904916	A/G/-	A03	1518455	+	NA	NA	NA	NA	NA	NA	A	A	A	R	A	A	A	A	A	A	A	A	A	A	A	A	A	A	A	A	A	A	A	A	A	A	A	A	A	A	A	A	A	A	A	A	A	A	A
Bn-A03-p1922712	A/G/-	A03	1540693	+	NA	NA	NA	NA	NA	NA	G	G	G	G	G	A	G	G	R	G	G	G	G	G	G	G	R	G	G	G	G	G	G	G	G	G	G	G	G	G	G	A	G	G	G	G	G	G	G
Bn-A03-p1923025	A/G/-	A03	1541004	+	NA	NA	NA	NA	NA	NA	A	A	A	A	A	G	A	A	R	A	A	A	A	A	A	A	R	A	A	A	A	A	A	A	A	A	A	A	A	A	A	G	A	A	A	A	A	A	A
Bn-A03-p1926809	A/C/-	A03	1543644	+	NA	NA	NA	NA	NA	NA	C	C	C	C	C	A	C	C	M	C	C	C	C	C	C	C	M	C	C	C	C	C	C	C	C	C	C	C	C	C	C	A	C	C	M	C	C	C	C
Bn-A03-p1959964	A/C/-	A03	1585906	+	NA	NA	NA	NA	NA	NA	C	C	C	C	C	A	C	C	M	C	C	C	C	C	C	C	C	C	C	C	C	C	C	C	C	C	C	C	C	C	C	A	C	C	M	C	C	C	C
Bn-A03-p1960694	T/C/-	A03	1586594	+	NA	NA	NA	NA	NA	NA	C	C	C	C	C	-	C	C	Y	C	C	C	C	C	C	C	C	C	C	C	C	C	C	C	C	C	C	C	C	C	C	T	C	C	Y	C	C	C	C
Bn-A03-p23318910	A/C/-	A03	1641307	+	NA	NA	NA	NA	NA	NA	A	A	A	C	A	C	C	A	C	A	A	A	A	A	A	M	A	A	A	A	A	A	C	A	A	A	A	A	A	A	A	A	A	A	A	A	A	A	A
Bn-A03-p23319135	T/G/-	A03	1641532	+	NA	NA	NA	NA	NA	NA	T	T	T	-	T	G	G	T	G	T	T	T	T	T	T	K	T	T	T	T	T	T	G	T	T	T	T	T	T	T	T	T	T	T	T	T	T	T	T
Bn-A03-p2030676	T/G/-	A03	1649707	+	NA	NA	NA	NA	NA	NA	G	G	G	G	G	G	G	G	G	G	T	G	G	G	G	G	-	T	G	-	G	G	G	G	G	G	G	G	G	G	G	G	G	G	-	G	G	G	G
Bn-A03-p24104930	T/C/-	A03	1687146	+	NA	NA	NA	NA	NA	NA	T	T	T	T	T	C	T	T	C	T	T	T	T	T	T	Y	T	T	T	C	T	T	C	T	T	T	T	T	T	T	T	T	T	T	T	T	T	T	T
Bn-A03-p2074890	A/G/-	A03	1689959	+	NA	NA	NA	NA	NA	NA	G	G	G	R	G	G	G	G	G	R	G	-	G	G	G	G	G	G	G	G	G	G	G	G	G	G	G	G	G	G	G	G	G	G	G	G	G	G	G
Bn-A03-p24092986	T/C/-	A03	1702041	+	NA	NA	NA	NA	NA	NA	T	T	C	T	T	C	C	T	C	T	T	T	T	T	T	Y	T	T	T	C	T	T	C	T	T	T	T	T	T	T	T	T	T	T	T	T	T	T	T
Bn-A03-p2100226	T/C/-	A03	1709434	+	NA	NA	NA	NA	NA	NA	C	C	T	C	C	C	C	C	C	C	T	T	C	C	C	C	C	T	C	C	C	T	C	C	-	C	C	C	C	C	C	C	C	C	-	C	C	T	C
Bn-A03-p2130281	A/G/-	A03	1731306	+	NA	NA	NA	NA	NA	NA	R	R	A	R	G	G	G	G	G	R	A	A	G	R	G	G	G	G	R	G	G	A	G	R	R	R	R	G	G	R	G	G	G	R	R	R	R	A	G
Bn-A03-p24048132	A/G/-	A03	1733969	+	NA	NA	NA	NA	NA	NA	A	A	A	A	A	G	A	A	G	A	A	A	A	A	A	R	A	A	A	G	A	A	G	A	A	A	A	A	A	A	A	A	A	A	A	A	A	A	A
Bn-A03-p24046452	T/C/-	A03	1734290	+	NA	NA	NA	NA	NA	NA	T	T	C	T	C	C	C	T	C	T	T	T	T	T	T	Y	T	T	T	C	T	T	C	T	T	T	T	T	T	T	T	T	T	T	T	T	T	T	T
Bn-A03-p24032564	T/C/-	A03	1743020	+	NA	NA	NA	NA	NA	NA	C	C	C	T	C	T	C	C	T	C	T	T	T	T	C	Y	C	C	C	T	T	T	T	T	C	C	C	C	C	T	C	C	T	T	C	C	C	T	C
Bn-A03-p24650359	T/C/-	A03	1751722	+	NA	NA	NA	NA	NA	NA	T	T	T	T	T	T	T	T	T	T	T	T	T	T	T	T	T	T	T	T	T	T	T	T	T	T	T	T	T	T	T	T	T	T	T	T	T	T	T
Bn-A03-p2171944	A/G/-	A03	1762765	+	NA	NA	NA	NA	NA	NA	G	G	G	R	A	A	A	R	R	R	G	R	A	G	A	A	R	A	G	R	R	G	A	G	G	G	G	A	G	G	A	A	G	G	R	G	G	G	A
Bn-A03-p2190638	T/C/-	A03	1777226	+	NA	NA	NA	NA	NA	NA	T	T	T	Y	T	T	T	T	T	Y	T	Y	T	T	T	T	T	T	T	T	T	T	T	T	T	T	T	T	T	T	T	T	T	T	T	T	T	T	T
Bn-A03-p2230320	A/G/-	A03	1811687	+	NA	NA	NA	NA	NA	NA	G	G	G	G	A	G	G	R	G	G	A	R	R	G	G	A	G	G	G	G	R	G	A	G	G	G	G	A	G	G	G	G	G	G	R	G	G	G	G
Bn-A03-p2262214	A/G/-	A03	1832035	+	NA	NA	NA	NA	NA	NA	R	R	G	R	G	G	-	R	R	R	G	G	A	R	G	G	R	G	R	A	R	G	G	R	R	R	R	G	A	R	G	G	A	R	R	R	R	A	G
Bn-A03-p25296332	A/C/-	A03	1873556	+	NA	NA	NA	NA	NA	NA	C	C	C	C	C	C	C	C	C	C	C	C	C	C	C	C	C	C	C	C	C	C	C	C	C	C	C	C	C	C	C	C	C	C	C	C	C	C	C
Bn-A03-p2311607	A/C/-	A03	1879700	+	NA	NA	NA	NA	NA	NA	M	M	C	A	C	A	A	M	A	M	C	C	A	M	A	C	A	A	M	A	M	C	C	M	M	M	M	C	A	M	A	A	A	M	-	M	M	A	A
Bn-A03-p26839758	T/C/-	A03	1923737	+	NA	NA	NA	NA	NA	NA	T	C	T	Y	T	C	T	T	T	T	T	T	T	T	T	T	T	T	T	T	T	T	C	T	T	T	T	C	T	T	T	T	T	T	T	T	T	T	T
Bn-A03-p27168311	T/G/-	A03	1956593	+	NA	NA	NA	NA	NA	NA	T	G	T	G	T	G	G	G	T	T	G	T	T	T	T	T	T	G	T	T	T	T	G	T	T	T	T	G	T	T	T	T	T	T	T	T	T	T	T
Bn-A03-p2412263	A/G/-	A03	1971697	+	NA	NA	NA	NA	NA	NA	G	G	G	G	G	G	G	G	G	A	G	G	G	G	G	G	G	G	G	G	G	G	G	G	G	G	G	G	G	G	G	G	G	G	G	G	G	G	G
Bn-A03-p27182289	A/C/-	A03	1972686	+	NA	NA	NA	NA	NA	NA	A	C	A	C	A	C	C	C	A	A	C	A	A	A	A	A	A	C	A	A	A	A	C	A	A	A	A	C	A	A	A	A	A	A	A	A	A	A	A
Bn-A03-p2449290	T/G/-	A03	1987475	+	NA	NA	NA	NA	NA	NA	G	G	G	G	G	T	G	G	T	T	T	G	G	G	G	G	G	G	G	G	G	G	G	G	G	G	G	G	G	G	T	T	T	G	G	G	G	T	G
Bn-A03-p27028300	A/G/-	A03	1987872	+	NA	NA	NA	NA	NA	NA	A	G	G	G	A	G	A	G	A	A	A	A	A	A	A	G	A	G	G	R	A	A	G	A	A	A	A	G	A	A	A	A	G	A	G	A	A	A	G
Bn-scaff_16110_1-p3586046	T/C/-	A03	1993319	+	NA	NA	NA	NA	NA	NA	C	C	T	T	C	T	C	T	C	C	C	C	C	C	C	T	C	T	T	Y	C	C	C	C	C	C	C	T	C	C	C	C	C	C	T	C	C	C	T
Bn-A03-p2457934	A/C/-	A03	1995949	+	NA	NA	NA	NA	NA	NA	A	A	A	A	A	C	A	A	C	C	C	A	A	A	A	A	A	A	A	A	A	A	A	A	A	A	A	A	A	A	C	C	-	A	A	A	A	-	A
Bn-A03-p2460475	A/G/-	A03	1998150	+	NA	NA	NA	NA	NA	NA	A	A	A	A	A	G	A	A	G	A	A	R	A	A	G	A	A	A	A	A	G	A	A	A	A	A	A	A	A	A	G	G	-	A	G	A	A	-	A
Bn-A03-p2469223	T/C/-	A03	2007177	+	NA	NA	NA	NA	NA	NA	T	T	T	T	T	C	T	T	C	T	T	T	T	T	T	T	T	T	T	T	T	T	T	T	T	T	T	T	T	T	C	C	T	T	T	T	T	T	T
Bn-A03-p27008420	T/C/-	A03	2010698	+	NA	NA	NA	NA	NA	NA	C	C	C	C	C	C	T	C	C	C	T	C	C	C	C	C	C	C	C	C	C	C	C	C	C	C	C	C	C	C	C	C	C	C	C	C	C	C	C
Bn-A03-p27006222	T/C/-	A03	2010913	+	NA	NA	NA	NA	NA	NA	T	T	T	T	T	T	C	T	T	T	Y	T	T	T	T	T	T	T	T	T	T	T	T	T	T	T	T	T	T	T	T	T	T	T	T	T	T	T	T
Bn-A03-p2483644	T/C/-	A03	2024064	+	NA	NA	NA	NA	NA	NA	T	T	T	T	T	C	T	T	C	T	T	T	T	T	T	T	T	T	T	T	T	T	T	T	T	T	T	T	T	T	C	C	-	T	T	T	T	-	T
Bn-A03-p2520008	A/G/-	A03	2073564	+	NA	NA	NA	NA	NA	NA	G	G	G	G	A	A	G	G	A	A	G	G	G	G	A	G	G	G	G	G	G	G	A	G	G	G	G	G	G	G	A	A	G	G	A	G	G	G	G
Bn-A03-p2521128	A/G/-	A03	2074683	+	NA	NA	NA	NA	NA	NA	A	A	A	A	G	G	A	A	G	A	A	A	A	A	G	A	A	A	A	A	A	A	G	A	A	A	A	A	A	A	G	G	-	A	G	A	A	-	A
Bn-A03-p27066000	T/C/-	A03	2079463	+	NA	NA	NA	NA	NA	NA	C	C	C	C	C	C	C	C	C	C	C	C	C	C	C	C	C	C	C	C	C	C	C	C	C	C	C	C	C	C	C	C	C	C	C	C	C	C	C
Bn-A03-p27070872	T/C/-	A03	2084193	+	NA	NA	NA	NA	NA	NA	C	C	C	C	C	C	T	C	C	C	T	C	C	C	C	C	C	C	C	C	C	C	C	C	C	C	C	C	C	C	C	C	C	C	C	C	C	C	C
Bn-A03-p2532699	T/C/-	A03	2086314	+	NA	NA	NA	NA	NA	NA	C	C	C	C	C	C	C	C	C	C	T	C	C	C	C	C	C	C	C	C	C	C	C	C	C	C	C	C	C	C	C	C	T	C	-	C	C	T	C
Bn-A03-p2548187	T/G/-	A03	2098331	+	NA	NA	NA	NA	NA	NA	T	T	T	T	G	G	T	T	G	G	T	T	T	T	G	T	T	T	T	T	T	T	G	T	T	T	T	T	T	T	G	G	T	T	K	T	T	T	G
Bn-A03-p27101177	T/C/-	A03	2112559	+	NA	NA	NA	NA	NA	NA	C	C	C	C	C	C	T	C	C	C	T	C	C	C	C	C	C	C	C	C	C	C	C	C	C	C	C	C	C	C	C	C	C	C	C	C	C	C	C
Bn-A03-p27104733	T/C/-	A03	2116115	+	NA	NA	NA	NA	NA	NA	T	T	T	T	T	T	C	T	T	T	C	T	T	T	T	T	T	T	T	T	T	T	T	T	T	T	T	T	T	T	T	T	T	T	T	T	T	T	T
Bn-scaff_18936_1-p358822	A/G/-	A03	2122025	+	NA	NA	NA	NA	NA	NA	G	G	G	G	A	A	G	G	A	G	G	G	G	G	G	G	G	G	G	G	G	G	A	G	G	G	G	G	G	G	A	A	G	G	R	G	G	G	G
Bn-A03-p27111541	A/G/-	A03	2123037	+	NA	NA	NA	NA	NA	NA	A	A	A	A	A	A	G	A	A	A	G	A	A	A	A	A	A	A	A	A	A	A	A	A	A	A	A	A	A	A	A	A	A	A	A	A	A	A	A
Bn-A03-p27112789	T/G/-	A03	2124285	+	NA	NA	NA	NA	NA	NA	T	G	T	G	T	G	G	G	T	T	G	T	T	T	T	T	T	G	T	T	T	T	G	T	T	T	T	G	T	T	T	T	T	T	T	T	T	T	T
Bn-A03-p2621677	T/C/-	A03	2164113	+	NA	NA	NA	NA	NA	NA	T	T	T	C	T	T	C	T	T	T	C	T	C	T	T	T	T	T	T	C	T	T	T	T	T	T	T	T	T	T	T	T	T	T	T	T	T	T	T
Bn-A03-p29834625	T/C/-	A03	2186141	+	NA	NA	NA	NA	NA	NA	C	C	T	C	C	C	C	C	T	C	C	C	C	T	C	T	T	C	C	C	T	T	C	T	C	T	C	C	T	T	T	C	C	T	C	Y	T	C	C
Bn-A03-p2643134	A/G/-	A03	2190785	+	NA	NA	NA	NA	NA	NA	G	G	G	A	G	G	-	G	G	A	A	G	A	G	A	G	G	G	G	A	G	G	G	G	G	G	G	G	G	G	G	G	G	G	-	G	G	G	G
Bn-A03-p2645391	T/C/-	A03	2193069	+	NA	NA	NA	NA	NA	NA	T	T	T	C	T	T	C	T	T	C	C	T	C	T	C	T	T	Y	T	C	T	T	T	T	T	T	T	T	T	T	T	T	-	T	-	T	T	C	T
Bn-A03-p29823747	A/G/-	A03	2216190	+	NA	NA	NA	NA	NA	NA	A	A	G	A	A	A	A	A	G	A	A	-	A	G	A	G	G	A	A	A	G	G	A	G	A	G	A	A	G	G	G	A	A	G	A	R	G	A	A
Bn-A03-p2665731	T/C/-	A03	2218213	+	NA	NA	NA	NA	NA	NA	C	C	C	C	T	T	C	C	T	T	C	T	C	C	T	C	T	T	C	C	T	C	T	C	C	C	C	C	C	C	T	T	-	C	C	C	C	-	C
Bn-A03-p2666271	T/C/-	A03	2218753	+	NA	NA	NA	NA	NA	NA	T	T	T	C	T	T	C	T	T	C	C	T	C	T	T	T	T	T	T	C	T	T	T	T	T	T	T	T	T	T	T	T	-	T	T	T	T	-	T
Bn-A03-p2668128	T/C/-	A03	2220616	+	NA	NA	NA	NA	NA	NA	T	T	T	T	C	C	T	T	C	C	T	T	T	T	T	T	T	T	T	T	T	T	C	T	T	T	T	T	T	T	C	C	-	T	T	T	T	-	T
Bn-A03-p2683534	A/C/-	A03	2235843	+	NA	NA	NA	NA	NA	NA	A	A	A	A	C	C	A	A	C	A	A	C	A	A	C	A	C	C	A	A	C	A	C	A	A	A	A	A	A	A	C	C	C	A	A	A	A	C	A
Bn-A03-p2691383	A/G/-	A03	2243694	+	NA	NA	NA	NA	NA	NA	G	G	A	A	G	G	A	G	G	A	A	G	A	G	G	G	G	G	G	A	G	G	G	G	G	G	G	G	G	G	G	G	G	G	A	G	G	G	G
Bn-A03-p2695311	T/C/-	A03	2247622	+	NA	NA	NA	NA	NA	NA	C	C	T	T	T	C	T	C	C	T	T	C	T	C	C	C	C	C	C	T	C	C	T	C	C	C	C	C	C	C	C	C	-	C	T	C	C	-	C
Bn-scaff_16704_1-p392535	A/C/-	A03	2255890	+	NA	NA	NA	NA	NA	NA	A	A	C	A	A	C	A	M	C	A	C	A	A	A	A	C	A	A	A	C	A	A	A	A	A	A	A	A	A	M	A	A	A	M	C	A	A	A	A
Bn-A03-p2704795	T/C/-	A03	2258794	+	NA	NA	NA	NA	NA	NA	C	C	C	C	T	C	C	C	C	T	T	T	C	C	T	C	T	T	C	C	T	C	T	C	C	C	C	C	C	C	C	C	C	C	T	C	C	C	C
Bn-A03-p2727877	T/C/-	A03	2282894	+	NA	NA	NA	NA	NA	NA	C	C	C	C	C	C	C	C	C	T	T	C	C	C	C	C	C	C	C	C	C	C	C	C	C	C	C	C	C	C	C	C	C	C	T	C	C	C	C
Bn-A03-p2789113	T/C/-	A03	2361246	+	NA	NA	NA	NA	NA	NA	C	C	C	C	C	C	C	C	C	C	C	C	C	C	C	C	C	C	C	C	C	C	C	C	C	C	C	C	C	C	C	C	C	C	C	C	C	C	C
Bn-A03-p2834684	T/G/-	A03	2404887	+	NA	NA	NA	NA	NA	NA	T	T	T	T	G	T	G	T	T	G	G	T	T	T	T	T	T	T	T	G	T	T	G	T	T	T	T	T	T	T	T	T	G	T	G	T	T	G	T
Bn-A03-p2843108	T/G/-	A03	2419830	+	NA	NA	NA	NA	NA	NA	G	G	G	G	T	G	T	G	G	T	T	G	G	G	G	G	G	G	G	T	G	G	T	G	G	G	G	G	G	G	G	G	-	G	T	G	G	-	G
Bn-A03-p2860489	T/C/-	A03	2428458	+	NA	NA	NA	NA	NA	NA	T	T	T	T	T	T	C	T	T	T	T	T	T	T	T	T	T	T	T	T	T	T	T	T	T	T	T	T	T	T	T	T	-	T	T	T	T	-	T
Bn-A03-p2879773	T/C/-	A03	2440092	+	NA	NA	NA	NA	NA	NA	T	T	T	T	T	T	C	T	T	T	T	T	T	T	T	T	T	T	T	T	T	T	T	T	T	T	T	T	T	T	T	T	T	T	T	T	T	T	T
Bn-A03-p2891056	A/G/-	A03	2451234	+	NA	NA	NA	NA	NA	NA	A	A	A	G	G	G	A	G	G	G	A	G	-	A	G	G	G	G	A	-	G	A	G	A	A	A	A	G	A	A	G	G	A	A	G	A	A	A	A
Bn-Scaffold000155-p353470	T/C/-	A03	2526836	+	NA	NA	NA	NA	NA	NA	C	C	C	C	C	C	C	C	C	C	C	C	C	C	C	C	C	C	C	C	C	C	C	C	C	C	C	C	C	C	C	C	C	C	C	C	C	C	C
Bn-A03-p2997270	T/G/-	A03	2559261	+	NA	NA	NA	NA	NA	NA	G	G	G	G	G	G	G	G	G	G	G	G	G	G	G	G	G	T	G	G	G	G	G	G	G	G	G	G	G	G	G	G	G	G	G	G	G	G	G
Bn-A03-p3075427	A/C/-	A03	2640302	+	NA	NA	NA	NA	NA	NA	C	C	C	C	A	A	A	A	A	C	A	A	A	C	A	C	A	C	C	A	A	C	A	C	C	C	C	C	C	C	A	A	C	C	C	C	C	C	C
Bn-A03-p3091011	A/G/-	A03	2654507	+	NA	NA	NA	NA	NA	NA	R	R	R	A	A	A	A	A	A	R	A	A	A	R	A	R	A	A	R	A	A	R	A	R	R	R	R	R	R	R	A	A	R	R	R	R	R	A	R
Bn-A03-p3099901	A/G/-	A03	2665942	+	NA	NA	NA	NA	NA	NA	G	G	G	G	A	A	A	A	A	A	A	A	A	G	A	G	A	A	G	A	A	G	A	G	G	G	G	G	G	G	A	A	G	G	G	G	G	A	G
Bn-A03-p3116829	T/C/-	A03	2687894	+	NA	NA	NA	NA	NA	NA	C	C	C	T	T	C	T	C	C	T	C	C	T	C	T	C	C	C	C	C	C	C	C	C	C	C	C	C	C	C	C	C	C	C	C	C	C	C	C
Bn-A03-p3156872	A/C/-	A03	2736702	+	NA	NA	NA	NA	NA	NA	A	A	C	A	A	A	A	A	A	A	C	A	A	A	A	A	A	C	A	C	A	A	A	A	A	A	A	A	A	A	A	A	C	A	C	A	A	A	A
Bn-A09-p11689854	T/G/-	A03	2756981	+	NA	NA	NA	NA	NA	NA	T	T	T	T	T	G	T	T	T	G	T	T	T	T	T	T	T	G	T	T	T	T	T	T	T	T	T	K	T	T	G	T	T	T	T	T	T	T	T
Bn-A09-p11690216	A/G/-	A03	2757343	+	NA	NA	NA	NA	NA	NA	A	A	A	A	A	G	A	A	A	G	A	A	A	A	A	A	A	G	A	A	A	A	A	A	A	A	A	R	A	A	G	A	A	A	A	A	A	A	A
Bn-A03-p3189093	T/C/-	A03	2764180	+	NA	NA	NA	NA	NA	NA	C	C	T	C	T	C	C	C	C	C	T	C	C	C	C	C	C	T	C	T	C	C	C	C	C	C	C	C	C	C	C	C	T	C	C	C	C	T	C
Bn-A03-p3189333	A/C/-	A03	2764420	+	NA	NA	NA	NA	NA	NA	C	C	A	C	A	C	C	C	C	C	A	C	C	C	C	C	C	A	C	A	C	C	C	C	C	C	C	C	C	C	C	C	A	C	C	C	C	A	C
Bn-A03-p3219484	A/C/-	A03	2789476	+	NA	NA	NA	NA	NA	NA	C	C	C	C	A	C	C	C	C	A	A	C	C	C	C	C	C	A	C	C	C	C	C	C	C	C	C	C	C	C	C	C	C	C	C	C	C	A	C
Bn-A03-p3272346	A/G/-	A03	2830857	+	NA	NA	NA	NA	NA	NA	G	A	A	A	A	A	A	A	A	A	A	A	A	A	G	A	A	G	G	G	G	G	A	G	A	G	A	A	G	A	A	A	A	G	G	G	G	A	A
Bn-A03-p31147953	A/G/-	A03	3167734	+	NA	NA	NA	NA	NA	NA	G	G	G	G	G	G	G	G	G	G	G	G	G	G	G	G	G	G	G	G	G	G	G	G	G	G	G	G	G	G	G	G	G	G	G	G	G	G	G
Bn-A03-p3698620	A/G/-	A03	3256206	+	NA	NA	NA	NA	NA	NA	A	A	A	A	A	A	A	A	A	G	G	A	A	A	A	A	A	A	A	A	A	A	A	A	A	A	A	A	A	A	A	A	A	A	A	A	A	A	A
Bn-A03-p31540985	T/C/-	A03	3256570	+	NA	NA	NA	NA	NA	NA	T	T	T	T	C	-	C	C	T	C	C	C	T	T	C	T	T	C	T	C	T	T	T	T	T	T	T	-	T	T	C	-	T	T	T	T	T	-	-
Bn-A03-p3819549	A/G/-	A03	3374434	+	NA	NA	NA	NA	NA	NA	G	G	G	G	G	G	G	G	G	G	A	G	G	G	G	G	G	G	G	G	G	G	G	G	G	G	G	G	G	G	G	G	G	G	G	G	G	G	G
Bn-A03-p3861991	T/G/-	A03	3418501	+	NA	NA	NA	NA	NA	NA	T	G	T	T	T	T	T	T	K	T	G	K	T	G	T	T	G	G	T	T	T	T	T	T	T	T	G	G	T	G	T	T	G	T	T	T	T	T	T
Bn-A03-p3862928	T/C/-	A03	3422273	+	NA	NA	NA	NA	NA	NA	C	C	C	C	C	C	C	C	C	C	T	C	C	C	C	C	C	T	C	C	C	C	C	C	C	C	C	C	C	C	C	C	C	C	C	C	C	C	C
Bn-A03-p3877500	A/C/-	A03	3436843	+	NA	NA	NA	NA	NA	NA	C	C	C	C	C	C	C	C	C	C	A	C	C	C	C	C	C	C	C	C	C	C	C	C	C	C	C	C	C	C	C	C	C	C	C	C	C	C	C
Bn-A03-p3951623	A/G/-	A03	3513216	+	NA	NA	NA	NA	NA	NA	G	G	G	G	G	G	G	G	G	G	G	G	G	G	G	G	G	A	G	G	G	G	G	G	G	G	G	G	G	G	G	G	G	G	G	G	G	A	G
Bn-A03-p3951816	A/C/-	A03	3513409	+	NA	NA	NA	NA	NA	NA	C	C	C	C	C	C	C	C	C	C	C	C	C	C	C	C	C	A	C	C	C	C	C	C	C	C	C	C	C	C	C	C	C	C	C	C	C	A	C
Bn-Scaffold000162-p320522	T/C/-	A03	3559351	+	NA	NA	NA	NA	NA	NA	T	T	T	T	T	T	T	T	T	T	T	C	T	T	T	T	T	T	T	T	T	T	T	T	T	T	T	T	T	T	T	T	T	T	T	T	T	T	T
Bn-A03-p4008078	T/C/-	A03	3570498	+	NA	NA	NA	NA	NA	NA	T	T	T	T	T	T	T	T	T	C	C	T	T	T	T	T	T	C	T	T	T	T	T	T	T	T	T	T	T	T	T	T	T	T	T	T	T	T	T
Bn-A03-p30951542	A/G/-	A03	3651055	+	NA	NA	NA	NA	NA	NA	G	G	G	G	G	G	G	G	G	G	G	R	G	G	G	G	G	G	G	G	G	G	G	G	G	G	G	G	G	G	G	G	G	G	G	G	G	G	G
Bn-A03-p4123164	T/C/-	A03	3651477	+	NA	NA	NA	NA	NA	NA	C	T	C	C	C	C	C	C	C	T	T	Y	C	T	T	C	C	T	C	T	T	C	C	C	C	C	T	C	C	T	C	C	T	C	T	C	C	C	C
Bn-A03-p4138735	A/G/-	A03	3663133	+	NA	NA	NA	NA	NA	NA	A	G	A	A	A	A	A	A	A	A	A	R	A	G	G	A	A	G	A	A	G	A	A	A	A	A	G	A	A	G	A	A	G	A	G	A	A	A	A
Bn-A03-p4167644	T/G/-	A03	3705364	+	NA	NA	NA	NA	NA	NA	T	T	T	K	T	G	T	T	T	G	G	T	T	T	G	T	T	G	T	T	T	T	T	T	T	T	T	T	T	T	G	G	T	T	G	T	T	T	T
Bn-A03-p4196989	A/G/-	A03	3735422	+	NA	NA	NA	NA	NA	NA	G	G	G	R	G	A	G	G	G	G	A	R	G	G	G	G	G	G	G	G	A	G	G	G	G	G	G	G	G	G	A	A	G	G	G	G	G	G	G
Bn-A03-p4205159	A/C/-	A03	3744069	+	NA	NA	NA	NA	NA	NA	A	A	A	-	A	C	A	A	-	A	C	M	A	A	A	A	C	C	A	A	C	A	A	A	A	A	A	C	A	A	C	C	A	A	A	A	A	C	A
Bn-A03-p4216444	A/C/-	A03	3755339	+	NA	NA	NA	NA	NA	NA	A	A	C	M	A	C	A	A	M	A	C	M	A	A	A	A	C	C	A	A	C	A	A	A	A	A	A	C	A	A	C	C	A	A	A	A	A	C	A
Bn-A03-p4235658	A/G/-	A03	3773108	+	NA	NA	NA	NA	NA	NA	A	A	G	-	A	A	A	A	-	A	G	R	A	A	A	A	G	G	A	A	G	A	A	A	A	A	A	G	A	A	A	A	A	A	A	A	A	G	A
Bn-A03-p4309562	A/C/-	A03	3838530	+	NA	NA	NA	NA	NA	NA	C	A	A	C	A	A	A	C	M	C	A	A	A	A	C	C	A	A	C	A	A	C	A	C	C	C	A	A	C	A	A	A	A	C	C	C	C	C	A
Bn-A03-p4339301	T/C/-	A03	3871042	+	NA	NA	NA	NA	NA	NA	C	T	T	C	T	T	T	C	Y	C	T	Y	T	T	C	C	T	T	C	T	C	C	T	C	C	C	T	T	C	T	T	T	T	C	C	C	C	C	T
Bn-A03-p4342338	T/C/-	A03	3874203	+	NA	NA	NA	NA	NA	NA	C	T	C	C	T	T	T	C	Y	C	T	Y	T	T	C	C	T	T	C	T	C	C	T	C	C	C	T	T	C	T	T	T	T	C	C	C	C	C	T
Bn-A03-p4348997	T/G/-	A03	3880737	+	NA	NA	NA	NA	NA	NA	T	G	T	T	G	G	G	T	K	T	G	K	G	G	T	T	G	G	T	G	T	T	G	T	T	T	G	G	T	G	G	G	G	T	T	T	T	T	G
Bn-A03-p4352837	A/G/-	A03	3885180	+	NA	NA	NA	NA	NA	NA	G	G	A	R	G	G	G	G	G	A	G	R	G	G	G	G	G	G	G	A	A	G	G	G	G	G	G	G	G	G	G	G	G	G	G	G	G	G	G
Bn-A03-p4382093	T/C/-	A03	3912230	+	NA	NA	NA	NA	NA	NA	T	T	T	T	T	T	T	T	T	T	C	T	T	T	T	T	T	C	T	T	T	T	T	T	T	T	T	T	T	T	T	T	T	T	T	T	T	T	T
Bn-A03-p4408006	A/C/-	A03	3938027	+	NA	NA	NA	NA	NA	NA	A	A	C	M	A	A	A	A	A	A	C	A	A	A	A	A	A	A	A	C	A	A	A	A	A	A	A	A	A	A	A	A	A	A	A	A	A	A	A
Bn-A03-p4408895	A/C/-	A03	3938915	+	NA	NA	NA	NA	NA	NA	A	A	C	-	C	C	A	A	A	A	C	A	A	A	A	A	A	A	A	C	A	A	C	A	A	A	A	A	A	A	A	C	A	A	A	A	A	A	A
Bn-A03-p4416817	T/G/-	A03	3943674	+	NA	NA	NA	NA	NA	NA	T	T	T	T	T	T	T	T	T	T	G	T	T	T	T	T	T	T	T	T	T	T	T	T	T	T	T	T	T	T	T	T	T	T	T	T	T	T	T
Bn-A03-p4425819	A/G/-	A03	3957759	+	NA	NA	NA	NA	NA	NA	A	G	A	A	G	G	G	A	R	G	G	R	G	G	A	A	G	G	A	A	G	A	G	A	A	A	G	G	A	G	G	G	G	A	A	A	A	A	G
Bn-A03-p4507718	T/G/-	A03	4030660	+	NA	NA	NA	NA	NA	NA	G	T	T	K	G	G	T	G	K	T	T	K	T	T	G	G	T	T	G	T	T	G	G	G	G	G	T	T	G	T	T	G	T	G	G	G	G	G	T
Bn-scaff_16923_1-p34465	A/C/-	A03	4033768	+	NA	NA	NA	NA	NA	NA	A	A	A	A	A	A	A	A	A	A	A	M	A	A	A	A	A	A	A	A	A	A	A	A	A	A	A	A	A	A	A	A	A	A	A	A	A	A	A
Bn-A03-p4509102	T/C/-	A03	4036726	+	NA	NA	NA	NA	NA	NA	T	T	C	Y	T	T	T	T	T	C	C	T	T	T	T	T	T	C	T	C	T	T	T	T	T	T	T	T	T	T	T	T	T	T	T	T	T	T	T
Bn-A03-p4548924	A/G/-	A03	4069908	+	NA	NA	NA	NA	NA	NA	G	G	G	R	G	G	G	G	G	A	A	G	G	G	G	G	G	A	G	A	G	G	G	G	G	G	G	G	G	G	G	G	G	G	G	G	G	G	G
Bn-A03-p4567578	T/C/-	A03	4088458	+	NA	NA	NA	NA	NA	NA	T	T	T	Y	T	T	T	T	T	T	C	T	T	T	T	T	T	C	T	C	T	T	T	T	T	T	T	T	T	T	T	T	T	T	T	T	T	T	T
Bn-A03-p4572110	A/C/-	A03	4092990	+	NA	NA	NA	NA	NA	NA	C	A	C	M	C	C	C	C	M	C	A	M	C	A	A	C	A	A	C	A	A	C	C	C	C	C	A	A	C	A	A	C	A	C	A	C	C	A	A
Bn-A03-p4607120	T/C/-	A03	4110215	+	NA	NA	NA	NA	NA	NA	C	C	C	Y	C	C	C	C	Y	C	T	C	C	C	C	C	T	T	C	T	C	C	C	C	C	C	C	T	C	C	C	C	C	C	C	C	C	C	C
Bn-A03-p4638893	A/G/-	A03	4143209	+	NA	NA	NA	NA	NA	NA	G	A	G	G	A	A	G	G	R	A	A	R	G	A	A	G	A	G	G	A	A	G	A	G	G	G	A	A	G	A	A	A	A	G	A	G	G	G	A
Bn-A03-p4659068	A/C/-	A03	4158468	+	NA	NA	NA	NA	NA	NA	C	C	C	C	C	C	C	C	C	C	C	C	C	C	C	C	C	-	C	C	C	C	C	C	C	C	C	C	C	C	C	C	C	C	C	C	C	C	C
Bn-A03-p4673503	A/G/-	A03	4171668	+	NA	NA	NA	NA	NA	NA	A	A	A	A	G	G	A	A	R	G	G	R	A	A	A	A	G	G	A	A	A	A	G	A	A	A	A	G	A	A	A	G	A	A	A	A	A	A	A
Bn-A03-p4769653	A/G/-	A03	4254779	+	NA	NA	NA	NA	NA	NA	A	A	A	A	G	G	A	A	A	G	G	A	A	A	A	A	A	A	A	A	A	A	G	A	A	A	A	A	A	A	A	G	A	A	A	A	A	A	A
Bn-A03-p4783485	T/C/-	A03	4262371	+	NA	NA	NA	NA	NA	NA	T	T	T	T	C	C	T	T	T	C	C	T	T	T	T	T	T	T	T	T	T	T	C	T	T	T	T	T	T	T	T	C	T	T	T	T	T	T	T
Bn-A03-p4827846	T/C/-	A03	4312981	+	NA	NA	NA	NA	NA	NA	T	C	T	T	C	C	T	T	T	C	C	T	T	C	T	T	T	C	T	T	T	T	C	T	T	T	C	T	T	C	T	C	C	T	T	T	T	T	T
Bn-A03-p5025156	T/C/-	A03	4457676	+	NA	NA	NA	NA	NA	NA	T	T	T	T	T	T	T	T	T	C	T	T	T	-	T	T	T	C	T	T	T	T	T	T	T	T	T	T	T	T	T	T	T	T	T	T	T	T	T
Bn-A03-p5039235	A/C/-	A03	4472290	+	NA	NA	NA	NA	NA	NA	C	C	C	C	A	A	C	C	C	C	A	C	C	C	M	C	C	C	C	C	C	C	A	C	C	C	C	C	C	C	C	C	C	C	C	C	C	C	C
Bn-A03-p5039586	T/C/-	A03	4473113	+	NA	NA	NA	NA	NA	NA	T	T	T	T	C	C	T	T	T	T	C	T	T	T	Y	T	T	T	T	T	-	T	C	T	T	T	T	T	T	T	T	T	T	T	T	T	T	T	T
Bn-A03-p5115321	A/C/-	A03	4548249	+	NA	NA	NA	NA	NA	NA	C	C	C	C	C	C	C	C	C	M	C	C	C	C	C	C	C	C	C	C	C	C	C	C	C	C	C	C	C	C	C	C	C	C	C	C	C	C	C
Bn-A03-p5131282	A/G/-	A03	4554529	+	NA	NA	NA	NA	NA	NA	A	A	A	A	G	A	A	A	A	R	A	A	A	A	R	A	A	A	A	A	A	A	G	A	A	A	A	A	A	A	A	A	A	A	A	A	A	A	A
Bn-A03-p5131371	A/G/-	A03	4554618	+	NA	NA	NA	NA	NA	NA	A	A	A	A	A	A	A	A	A	R	A	A	A	A	A	A	A	A	A	A	A	A	A	A	A	A	A	A	A	A	A	A	A	A	A	A	A	A	A
Bn-A03-p5133977	T/C/-	A03	4558145	+	NA	NA	NA	NA	NA	NA	T	T	T	T	T	T	T	T	T	Y	T	T	T	T	T	T	T	T	T	T	T	T	T	T	T	T	T	T	T	T	T	T	T	T	T	T	T	T	T
Bn-A03-p5140947	T/C/-	A03	4568578	+	NA	NA	NA	NA	NA	NA	T	T	T	T	C	T	T	T	T	Y	T	T	T	T	Y	T	T	T	T	T	T	T	C	T	T	T	T	T	T	T	T	T	T	T	T	T	T	T	T
Bn-A03-p5144171	A/G/-	A03	4573108	+	NA	NA	NA	NA	NA	NA	A	A	A	A	G	A	A	A	A	R	A	A	A	A	-	A	A	A	A	A	A	A	G	A	A	A	A	A	A	A	A	A	A	A	A	A	A	A	A
Bn-A03-p5160088	T/C/-	A03	4587309	+	NA	NA	NA	NA	NA	NA	C	C	C	T	C	T	C	T	T	T	C	T	C	C	T	C	C	T	T	T	T	C	C	C	C	C	C	C	C	C	T	C	C	C	T	C	C	T	T
Bn-A03-p5177830	A/G/-	A03	4604524	+	NA	NA	NA	NA	NA	NA	A	A	A	G	A	G	A	G	R	R	A	R	A	A	R	A	A	G	G	G	G	A	A	A	A	A	A	A	A	A	G	A	A	A	G	A	A	G	G
Bn-A03-p5222291	A/G/-	A03	4651899	+	NA	NA	NA	NA	NA	NA	G	G	G	A	G	A	G	A	R	R	G	R	G	G	A	G	G	A	A	G	A	G	G	G	G	G	G	G	G	G	A	G	G	G	A	G	G	A	G
Bn-A03-p5227700	T/C/-	A03	4657049	+	NA	NA	NA	NA	NA	NA	C	T	C	C	C	C	C	C	C	Y	C	C	C	T	C	C	C	C	C	C	C	C	C	C	C	C	T	C	C	T	C	C	T	C	C	C	C	C	C
Bn-A03-p5230726	T/C/-	A03	4660636	+	NA	NA	NA	NA	NA	NA	C	T	C	T	C	T	C	T	Y	Y	C	Y	C	T	Y	C	C	C	T	C	T	C	T	C	C	C	T	C	C	T	C	C	T	C	T	C	C	C	C
Bn-A03-p5341139	A/C/-	A03	4754949	+	NA	NA	NA	NA	NA	NA	C	C	C	A	A	A	C	A	A	C	C	M	C	C	-	A	A	C	C	A	A	C	C	C	C	C	C	A	C	C	C	C	C	C	C	C	C	A	A
Bn-scaff_22728_1-p109366	A/G/-	A03	4766941	+	NA	NA	NA	NA	NA	NA	A	A	G	A	G	A	G	A	A	A	G	G	A	A	A	A	G	A	G	R	G	G	A	G	A	A	A	G	A	A	A	A	A	A	A	A	A	A	A
Bn-A03-p5380857	A/C/-	A03	4797861	+	NA	NA	NA	NA	NA	NA	C	C	C	A	C	C	C	A	A	C	C	M	C	C	M	A	A	C	C	C	A	C	C	C	C	C	C	A	C	C	C	C	C	C	C	C	C	A	C
Bn-A03-p5408678	T/C/-	A03	4826009	+	NA	NA	NA	NA	NA	NA	C	T	T	C	T	T	T	C	Y	T	C	Y	T	T	-	C	T	T	T	C	C	C	T	C	C	C	T	T	C	T	T	T	T	C	T	C	C	C	T
Bn-A03-p5423318	A/C/-	A03	4842974	+	NA	NA	NA	NA	NA	NA	C	C	C	C	C	C	C	C	C	C	C	C	C	C	C	C	C	C	C	C	C	C	C	C	C	C	C	C	C	C	C	C	C	C	C	C	C	C	C
Bn-scaff_18322_1-p2731053	A/C/-	A03	4852419	+	NA	NA	NA	NA	NA	NA	C	C	A	C	A	C	C	C	C	C	C	C	C	C	C	C	C	C	C	C	C	C	C	C	C	C	C	C	C	C	C	C	C	C	C	C	C	C	A
Bn-A03-p5455069	T/C/-	A03	4872880	+	NA	NA	NA	NA	NA	NA	C	T	T	T	T	T	T	T	T	T	C	T	T	T	C	T	T	T	T	C	T	C	T	C	C	C	T	T	C	T	T	T	T	C	C	C	C	C	T
Bn-A03-p5467712	T/C/-	A03	4883895	+	NA	NA	NA	NA	NA	NA	T	C	C	C	C	C	C	C	C	C	T	C	C	C	T	C	C	C	C	T	C	T	C	T	T	T	C	C	T	C	C	C	C	T	T	T	T	T	C
Bn-A03-p5502308	T/G/-	A03	4931843	+	NA	NA	NA	NA	NA	NA	T	T	G	G	G	T	G	G	G	G	T	G	G	T	K	G	G	G	T	T	G	T	G	T	T	-	-	G	T	T	G	G	T	T	G	T	-	T	G
Bn-A03-p5523239	A/C/-	A03	4954768	+	NA	NA	NA	NA	NA	NA	A	C	C	C	C	C	C	C	C	C	A	C	C	C	C	C	C	C	A	A	C	A	C	A	A	A	C	C	A	C	C	C	C	A	C	A	A	C	C
Bn-Scaffold000096-p508415	A/G/-	A03	4978071	+	NA	NA	NA	NA	NA	NA	G	G	G	G	G	G	G	G	G	G	G	A	G	G	G	G	G	G	G	G	G	G	G	G	G	G	G	G	G	G	G	G	G	G	G	G	G	G	G
Bn-Scaffold000096-p590605	T/C/-	A03	5045414	+	NA	NA	NA	NA	NA	NA	T	T	T	T	T	T	T	T	T	T	T	C	T	T	T	T	T	T	T	T	T	T	T	T	T	T	T	T	T	T	T	T	T	T	T	T	T	T	T
Bn-Scaffold000096-p598260	A/G/-	A03	5053498	+	NA	NA	NA	NA	NA	NA	G	G	G	G	G	G	G	G	G	G	G	A	G	G	G	G	G	G	G	G	G	G	G	G	G	G	G	G	G	G	G	G	G	G	G	G	G	G	G
Bn-A03-p5694401	T/C/-	A03	5119830	+	NA	NA	NA	NA	NA	NA	T	T	C	C	C	C	T	C	Y	C	T	C	T	T	Y	C	T	C	C	C	C	T	T	T	T	T	T	C	T	T	C	T	T	T	T	T	T	T	C
Bn-Scaffold000096-p700012	A/G/-	A03	5124890	+	NA	NA	NA	NA	NA	NA	G	G	G	G	G	G	G	G	G	G	G	-	G	G	G	G	G	G	G	G	G	G	G	G	G	G	G	G	G	G	G	G	G	G	G	G	G	G	G
Bn-A03-p5711923	T/C/-	A03	5139932	+	NA	NA	NA	NA	NA	NA	C	C	T	C	T	C	T	C	C	Y	C	C	T	C	C	C	C	C	C	C	C	C	C	C	C	C	C	C	C	C	C	T	C	C	C	C	C	C	T
Bn-Scaffold000096-p717822	A/C/-	A03	5147829	+	NA	NA	NA	NA	NA	NA	A	A	A	A	A	A	A	A	A	A	A	M	A	A	A	A	A	A	A	A	A	A	A	A	A	A	A	A	A	A	A	A	A	A	A	A	A	A	A
Bn-A03-p5721171	T/C/-	A03	5149621	+	NA	NA	NA	NA	NA	NA	C	C	T	T	T	T	C	T	Y	Y	C	T	C	C	Y	T	C	C	T	T	T	C	C	C	C	C	C	T	C	C	T	C	C	C	C	C	C	T	T
Bn-A03-p5721617	T/G/-	A03	5150067	+	NA	NA	NA	NA	NA	NA	G	G	G	G	G	G	T	G	K	K	G	G	T	G	K	G	T	T	G	G	G	G	G	G	G	G	G	G	G	G	G	T	G	G	T	G	G	G	G
Bn-A03-p5742880	A/G/-	A03	5172025	+	NA	NA	NA	NA	NA	NA	A	A	G	A	G	A	G	A	A	R	A	A	G	A	A	A	A	A	A	A	A	A	A	A	A	A	A	A	A	A	A	G	A	A	A	A	A	A	G
Bn-A03-p5744750	T/G/-	A03	5178211	+	NA	NA	NA	NA	NA	NA	T	T	G	T	G	T	G	T	T	K	T	T	G	T	T	T	T	T	T	T	T	T	T	T	T	T	T	T	T	T	T	G	T	T	T	T	T	T	G
Bn-A03-p5745449	A/G/-	A03	5178903	+	NA	NA	NA	NA	NA	NA	A	A	G	A	G	A	G	A	A	R	A	A	G	A	A	A	A	A	A	A	A	A	A	A	A	A	A	A	A	A	A	G	A	A	A	A	A	A	G
Bn-Scaffold000096-p760723	T/C/-	A03	5179706	+	NA	NA	NA	NA	NA	NA	C	C	C	C	C	C	C	C	C	C	C	Y	C	C	C	C	C	C	C	C	C	C	C	C	C	C	C	C	C	C	C	C	C	C	C	C	C	C	C
Bn-A03-p5784532	T/C/-	A03	5215835	+	NA	NA	NA	NA	NA	NA	C	C	C	T	C	T	T	T	Y	T	C	T	T	C	Y	T	C	C	C	C	T	C	C	C	C	C	C	T	C	C	Y	T	C	C	C	C	C	T	C
Bn-A03-p5796033	T/C/-	A03	5227228	+	NA	NA	NA	NA	NA	NA	C	C	C	T	C	-	T	T	T	T	C	T	T	C	Y	T	C	C	C	C	T	C	C	C	C	C	C	T	C	C	Y	T	C	C	C	C	C	T	C
Bn-A03-p5956934	T/C/-	A03	5370405	+	NA	NA	NA	NA	NA	NA	T	T	T	T	T	T	T	Y	Y	T	T	Y	T	T	T	C	T	T	T	T	C	T	C	T	T	T	T	T	T	T	T	T	T	T	T	T	T	T	T
Bn-A03-p16800145	A/G/-	A03	5386822	+	NA	NA	NA	NA	NA	NA	G	G	G	G	G	G	A	G	G	R	G	G	G	A	R	G	G	G	G	A	G	G	G	G	G	G	G	G	G	G	A	G	A	G	A	G	G	G	G
Bn-A03-p5984123	T/C/-	A03	5399751	+	NA	NA	NA	NA	NA	NA	T	T	T	T	T	T	T	Y	-	T	T	-	T	T	T	C	T	T	T	T	C	T	C	T	T	T	T	T	T	T	T	T	T	T	T	T	T	T	T
Bn-A03-p6036521	A/C/-	A03	5448828	+	NA	NA	NA	NA	NA	NA	A	A	A	A	A	A	A	A	A	A	A	A	A	A	M	A	A	C	A	C	A	A	A	A	A	A	A	A	A	A	M	A	A	A	C	A	A	A	A
Bn-A03-p6274828	T/C/-	A03	5625604	+	NA	NA	NA	NA	NA	NA	T	T	T	T	T	T	C	T	Y	Y	T	T	C	T	Y	T	C	C	T	T	T	Y	T	T	T	T	T	T	T	T	T	C	T	T	T	T	T	C	T
Bn-A03-p6288173	T/C/-	A03	5638107	+	NA	NA	NA	NA	NA	NA	T	T	T	T	T	T	C	T	Y	C	T	T	C	T	Y	T	C	T	T	T	T	Y	T	T	T	T	T	T	T	T	Y	C	T	T	T	T	T	C	T
Bn-A03-p6332797	T/C/-	A03	5681359	+	NA	NA	NA	NA	NA	NA	C	C	C	C	C	C	C	C	C	Y	C	C	C	C	C	C	C	T	C	C	C	C	C	C	C	C	C	C	C	C	Y	C	C	C	C	C	C	C	C
Bn-A03-p6335597	A/G/-	A03	5683896	+	NA	NA	NA	NA	NA	NA	G	G	G	A	G	A	A	R	A	G	G	R	A	G	R	A	A	A	G	G	A	R	G	G	G	G	G	G	G	G	G	A	G	G	G	G	G	A	G
Bn-A03-p6385958	A/G/-	A03	5710065	+	NA	NA	NA	NA	NA	NA	A	A	A	G	A	G	G	R	G	A	A	-	G	A	R	G	G	G	A	A	G	-	A	A	A	A	A	A	A	A	A	G	A	A	A	A	A	G	A
Bn-A03-p6420355	A/C/-	A03	5740679	+	NA	NA	NA	NA	NA	NA	C	C	C	C	C	C	C	C	C	M	C	C	A	C	C	C	C	A	C	C	C	C	C	C	C	C	C	C	C	C	M	-	C	C	C	C	C	C	C
Bn-A03-p6423049	T/C/-	A03	5743626	+	NA	NA	NA	NA	NA	NA	T	T	T	T	T	T	T	T	T	Y	T	T	C	T	T	T	T	C	T	T	T	T	T	T	T	T	T	T	T	T	Y	C	T	T	T	T	T	T	T
Bn-A03-p6456584	A/C/-	A03	5770337	+	NA	NA	NA	NA	NA	NA	A	A	A	A	A	A	A	A	A	A	A	A	A	A	A	A	A	C	A	A	A	A	A	A	A	A	A	A	A	A	-	A	A	A	A	A	A	A	A
Bn-A03-p6484137	A/G/-	A03	5777414	+	NA	NA	NA	NA	NA	NA	A	A	A	A	A	A	A	A	A	R	A	A	G	A	A	A	A	G	A	A	A	A	A	A	A	A	A	A	A	A	A	G	A	A	A	A	A	A	A
Bn-A03-p6522454	A/G/-	A03	5813279	+	NA	NA	NA	NA	NA	NA	G	G	G	G	G	G	R	G	G	R	R	R	A	R	R	G	R	G	R	G	R	R	G	R	G	G	G	R	R	R	R	A	R	R	R	G	G	G	G
Bn-A03-p6576575	A/G/-	A03	5874703	+	NA	NA	NA	NA	NA	NA	A	A	A	A	A	A	A	A	A	R	A	A	A	A	A	A	A	A	A	A	A	A	A	A	A	A	A	A	A	A	R	A	A	A	A	A	A	A	A
Bn-A03-p6636780	A/G/-	A03	5928259	+	NA	NA	NA	NA	NA	NA	A	A	A	A	A	A	A	A	A	R	A	A	A	A	A	A	A	A	A	A	A	A	A	A	A	A	A	A	A	A	R	A	A	A	A	A	A	A	A
Bn-A03-p6710409	A/G/-	A03	5985980	+	NA	NA	NA	NA	NA	NA	G	G	G	A	G	A	G	G	G	G	G	G	G	G	G	G	G	G	G	G	G	G	G	G	G	G	G	G	G	G	R	G	G	G	G	G	G	G	G
Bn-A03-p6710651	T/C/-	A03	5986222	+	NA	NA	NA	NA	NA	NA	T	T	T	C	T	C	T	T	T	T	T	T	T	T	T	T	T	T	T	T	T	T	T	T	T	T	T	T	T	T	Y	T	T	T	T	T	T	T	T
Bn-A03-p6744274	A/G/-	A03	6017737	+	NA	NA	NA	NA	NA	NA	G	G	G	A	G	A	G	G	G	G	G	G	G	G	G	G	G	A	G	G	G	G	G	G	G	G	G	G	G	G	R	G	G	G	G	G	G	G	G
Bn-A03-p6771876	A/G/-	A03	6052034	+	NA	NA	NA	NA	NA	NA	A	A	A	A	A	A	A	R	G	G	A	R	A	R	A	G	A	A	A	G	G	A	A	A	A	A	A	A	A	A	R	A	G	A	R	A	A	A	A
Bn-A03-p6772326	T/G/-	A03	6052481	+	NA	NA	NA	NA	NA	NA	T	T	T	T	T	T	T	K	G	G	T	K	T	K	T	G	T	T	T	G	G	T	T	T	T	T	T	T	T	T	K	T	G	T	-	T	T	T	T
Bn-A03-p6781156	T/C/-	A03	6054337	+	NA	NA	NA	NA	NA	NA	C	C	C	C	C	C	C	Y	T	T	C	Y	C	Y	C	T	C	C	C	T	T	C	C	C	C	C	C	C	C	C	Y	C	T	C	-	C	C	C	C
Bn-A03-p6783685	T/C/-	A03	6056898	+	NA	NA	NA	NA	NA	NA	T	T	T	T	T	T	T	T	C	C	T	Y	T	Y	T	C	T	T	T	C	C	T	T	T	T	T	T	T	T	T	Y	T	C	T	-	T	T	T	T
Bn-A03-p6789784	T/C/-	A03	6062886	+	NA	NA	NA	NA	NA	NA	C	C	C	C	C	C	C	C	C	C	C	C	C	C	-	C	C	T	C	C	C	C	C	C	C	C	C	C	C	C	C	C	C	C	T	C	C	C	C
Bn-A03-p6791851	T/C/-	A03	6064954	+	NA	NA	NA	NA	NA	NA	C	C	C	T	C	T	C	C	C	C	C	C	C	C	C	C	C	T	C	C	C	C	C	C	C	C	C	C	C	C	C	C	C	C	-	C	C	C	C
Bn-A03-p6804857	A/G/-	A03	6077800	+	NA	NA	NA	NA	NA	NA	A	A	A	A	A	A	A	G	G	A	A	R	G	R	R	G	A	A	A	G	G	A	A	A	A	A	A	A	A	A	A	G	G	A	G	A	A	A	A
Bn-A03-p6807075	T/C/-	A03	6080014	+	NA	NA	NA	NA	NA	NA	C	C	C	C	C	C	T	T	T	Y	C	Y	T	Y	Y	T	C	T	C	T	T	C	C	C	C	C	C	C	C	C	C	T	T	C	T	C	C	C	C
Bn-A03-p6849607	T/C/-	A03	6139159	+	NA	NA	NA	NA	NA	NA	C	C	C	C	C	C	T	T	T	Y	C	Y	T	Y	Y	T	C	C	C	T	T	C	C	C	C	C	C	C	C	C	C	T	T	C	T	C	C	C	C
Bn-A03-p6984742	T/C/-	A03	6265677	+	NA	NA	NA	NA	NA	NA	C	C	C	C	C	T	C	C	C	Y	C	C	C	C	C	C	C	T	C	C	C	C	C	C	C	C	C	C	C	C	Y	C	C	C	C	C	C	C	C
Bn-A03-p6994294	A/G/-	A03	6278471	+	NA	NA	NA	NA	NA	NA	G	G	A	G	G	A	A	G	G	-	G	G	A	R	R	G	G	A	G	A	G	G	G	G	G	G	G	G	G	G	R	A	A	G	A	G	G	G	G
Bn-A03-p7058001	T/C/-	A03	6344405	+	NA	NA	NA	NA	NA	NA	T	T	C	Y	T	C	C	T	T	Y	T	T	C	T	Y	T	T	T	T	T	T	T	T	T	T	T	T	T	T	T	Y	T	T	T	C	T	T	T	T
Bn-A03-p7075595	A/C/-	A03	6360991	+	NA	NA	NA	NA	NA	NA	A	A	A	A	A	A	A	A	A	A	A	A	A	A	A	A	A	C	A	A	A	A	A	A	A	A	A	A	A	A	A	A	A	A	A	A	A	A	A
Bn-A10-p1629545	A/G/-	A03	6379577	+	NA	NA	NA	NA	NA	NA	G	G	A	G	G	A	A	G	G	G	G	G	A	G	R	G	G	A	G	G	G	G	G	G	G	G	G	G	G	G	R	A	A	G	A	G	G	G	G
Bn-A03-p7094698	T/C/-	A03	6380016	+	NA	NA	NA	NA	NA	NA	T	T	C	Y	T	C	C	T	T	T	T	T	C	T	Y	T	T	C	T	T	T	T	T	T	T	T	T	T	T	T	Y	C	C	T	C	T	T	T	T
Bn-A03-p7110332	T/C/-	A03	6388229	+	NA	NA	NA	NA	NA	NA	C	C	T	C	C	T	T	C	C	C	C	C	T	C	Y	C	C	C	C	C	C	C	C	C	C	C	C	C	C	C	Y	T	T	C	T	C	C	C	C
Bn-A03-p7157782	T/C/-	A03	6433760	+	NA	NA	NA	NA	NA	NA	T	T	T	T	Y	T	T	T	T	T	T	T	T	T	T	T	T	C	T	T	T	T	Y	T	T	T	T	T	T	T	Y	T	T	T	T	T	T	T	T
Bn-A03-p7159916	T/G/-	A03	6435890	+	NA	NA	NA	NA	NA	NA	G	G	T	-	G	T	T	G	G	-	G	G	G	K	-	G	G	G	G	G	G	G	G	G	G	G	G	G	G	G	G	T	T	G	T	G	G	G	G
Bn-A03-p7167442	T/C/-	A03	6443993	+	NA	NA	NA	NA	NA	NA	T	T	C	T	C	C	T	T	T	T	T	T	C	Y	Y	T	T	C	T	T	T	T	C	T	T	T	T	T	T	T	T	C	C	T	C	T	T	T	C
Bn-A03-p7177504	A/C/-	A03	6450533	+	NA	NA	NA	NA	NA	NA	C	C	A	-	A	A	C	C	C	C	C	C	A	M	C	C	C	C	C	C	C	C	A	C	C	C	C	C	C	C	M	A	A	C	C	C	C	C	A
Bn-A03-p7178917	T/C/-	A03	6451937	+	NA	NA	NA	NA	NA	NA	T	T	C	Y	C	C	T	T	T	Y	T	T	C	Y	T	T	T	T	T	T	T	T	C	T	T	T	T	T	T	T	Y	C	C	T	T	T	T	T	C
Bn-A03-p7180288	A/G/-	A03	6453308	+	NA	NA	NA	NA	NA	NA	G	G	A	R	A	A	G	G	G	R	G	G	A	R	G	G	G	A	G	G	G	G	A	G	G	G	G	G	G	G	G	A	A	G	G	G	G	G	A
Bn-scaff_18322_1-p320439	T/C/-	A03	6457090	+	NA	NA	NA	NA	NA	NA	C	C	C	C	C	C	C	C	C	C	C	C	C	C	C	C	C	T	C	C	C	C	C	C	C	C	C	C	C	C	Y	C	C	C	C	C	C	C	C
Bn-A03-p7186958	T/C/-	A03	6458921	+	NA	NA	NA	NA	NA	NA	T	T	T	T	T	T	T	T	T	T	T	T	T	T	T	T	T	C	T	T	T	T	T	T	T	T	T	T	T	T	T	T	T	T	T	T	T	T	T
Bn-A03-p7218582	T/C/-	A03	6493980	+	NA	NA	NA	NA	NA	NA	T	T	T	T	T	T	T	T	T	T	T	T	T	T	T	T	T	C	T	T	T	T	T	T	T	T	T	T	T	T	T	T	T	T	T	T	T	T	T
Bn-A03-p7224854	A/C/-	A03	6500076	+	NA	NA	NA	NA	NA	NA	C	C	A	C	A	A	A	C	C	C	C	C	A	M	C	C	C	A	C	C	C	C	A	C	C	C	C	C	C	C	M	A	A	C	C	C	C	C	A
Bn-A03-p7228211	T/G/-	A03	6502944	+	NA	NA	NA	NA	NA	NA	T	T	T	T	T	T	T	T	T	T	T	T	T	T	T	T	T	T	T	T	T	T	T	T	T	T	T	T	T	T	T	T	T	T	T	T	T	T	T
Bn-A03-p7239205	T/C/-	A03	6515029	+	NA	NA	NA	NA	NA	NA	T	T	C	Y	C	C	C	T	T	Y	T	T	C	Y	T	T	T	C	T	T	T	T	C	T	T	T	T	T	T	T	Y	C	C	T	T	T	T	T	C
Bn-A03-p7248970	A/C/-	A03	6521634	+	NA	NA	NA	NA	NA	NA	A	A	A	A	A	A	A	A	A	A	A	A	A	A	A	A	A	C	A	A	A	A	A	A	A	A	A	A	A	A	A	A	A	A	A	A	A	A	A
Bn-A03-p7319235	A/C/-	A03	6598639	+	NA	NA	NA	NA	NA	NA	C	C	A	M	A	A	A	C	C	C	C	C	A	M	M	C	C	C	C	C	C	C	A	C	C	C	C	C	C	C	M	A	A	C	C	C	C	C	A
Bn-A03-p7331109	A/C/-	A03	6610372	+	NA	NA	NA	NA	NA	NA	A	A	C	M	C	C	C	A	A	M	A	A	C	M	M	A	A	A	A	A	A	A	C	A	A	A	A	A	A	A	M	C	C	A	A	A	A	A	C
Bn-A03-p7366783	T/C/-	A03	6663673	+	NA	NA	NA	NA	NA	NA	C	C	C	T	T	T	C	T	T	T	C	Y	T	Y	Y	T	Y	C	C	C	T	C	T	C	C	C	C	C	C	C	C	T	C	C	C	C	C	C	T
Bn-A03-p7378514	T/C/-	A03	6674928	+	NA	NA	NA	NA	NA	NA	C	C	C	C	C	C	C	C	C	C	C	C	C	C	C	C	C	T	C	C	C	C	C	C	T	C	C	C	C	C	C	C	C	C	C	C	C	C	C
Bn-A03-p7382887	A/C/-	A03	6681140	+	NA	NA	NA	NA	NA	NA	A	A	C	A	A	A	C	A	A	A	A	A	A	A	A	A	A	C	A	A	A	A	A	A	A	A	A	A	A	A	A	A	C	A	A	A	A	A	A
Bn-A03-p7434488	T/C/-	A03	6726812	+	NA	NA	NA	NA	NA	NA	T	T	T	Y	C	C	T	T	T	-	T	T	T	T	Y	T	T	T	T	T	T	T	C	T	T	T	T	T	T	T	T	C	T	T	T	T	T	T	C
Bn-A03-p7445206	T/C/-	A03	6741092	+	NA	NA	NA	NA	NA	NA	C	C	C	T	C	T	C	T	T	C	C	T	T	C	T	T	Y	-	C	T	T	Y	C	T	T	C	C	T	C	C	T	C	C	C	T	C	C	T	C
Bn-A03-p7458972	T/C/-	A03	6757068	+	NA	NA	NA	NA	NA	NA	C	C	C	C	C	C	C	C	C	C	C	C	C	C	C	C	C	C	C	C	C	C	C	C	C	C	C	C	C	C	C	C	C	C	C	C	C	C	C
Bn-A03-p7467515	A/C/-	A03	6765570	+	NA	NA	NA	NA	NA	NA	C	C	A	C	C	C	A	C	C	M	C	C	C	C	C	C	C	A	C	C	C	C	C	C	C	C	C	C	C	C	C	C	A	C	C	C	C	C	C
Bn-A03-p7480105	T/C/-	A03	6782724	+	NA	NA	NA	NA	NA	NA	T	T	T	-	T	C	T	T	T	Y	T	T	T	T	Y	T	T	C	T	T	T	T	T	T	T	T	T	T	T	T	T	T	T	T	T	T	T	T	T
Bn-A03-p7482812	A/G/-	A03	6785431	+	NA	NA	NA	NA	NA	NA	G	G	G	R	A	G	G	A	A	R	G	A	A	G	R	A	-	A	G	A	A	R	A	A	G	G	G	A	G	G	A	G	G	G	A	G	G	A	A
Bn-A03-p7491211	A/C/-	A03	6789397	+	NA	NA	NA	NA	NA	NA	C	C	C	A	A	-	C	A	A	A	C	A	A	C	-	A	C	A	C	A	A	M	A	A	C	C	C	-	C	C	A	C	C	C	A	C	C	-	A
Bn-A03-p7493664	A/G/-	A03	6791842	+	NA	NA	NA	NA	NA	NA	A	A	A	R	A	G	A	A	A	R	A	A	A	A	R	A	A	G	A	A	A	A	A	A	A	A	A	A	A	A	A	A	A	A	A	A	A	A	A
Bn-A03-p7500107	T/C/-	A03	6798399	+	NA	NA	NA	NA	NA	NA	T	T	C	-	C	T	C	C	C	Y	T	C	C	T	Y	C	Y	T	T	C	C	Y	C	C	T	T	T	C	T	T	C	T	C	T	C	T	T	C	C
Bn-A03-p7543362	A/G/-	A03	6848465	+	NA	NA	NA	NA	NA	NA	G	G	A	G	G	A	A	G	G	G	G	G	G	G	R	G	G	A	G	G	G	G	G	G	G	G	G	G	G	G	G	G	G	G	G	G	G	G	G
Bn-A03-p7555264	T/C/-	A03	6861108	+	NA	NA	NA	NA	NA	NA	T	T	T	-	T	C	C	T	T	Y	T	T	T	T	C	T	T	C	T	C	T	T	T	T	T	T	T	T	T	T	C	C	T	T	C	T	T	T	T
Bn-A03-p7571364	A/G/-	A03	6881610	+	NA	NA	NA	NA	NA	NA	G	G	G	G	G	A	A	G	G	G	G	G	G	G	A	G	G	A	G	G	G	G	G	G	G	G	G	G	G	G	A	A	G	G	A	G	G	G	G
Bn-A03-p7572109	A/C/-	A03	6882350	+	NA	NA	NA	NA	NA	NA	A	A	A	A	A	A	C	A	A	A	A	A	A	A	A	A	A	C	A	A	A	A	A	A	A	A	A	A	A	A	C	A	A	A	A	A	A	A	A
Bn-A03-p7614596	T/C/-	A03	6911003	+	NA	NA	NA	NA	NA	NA	T	T	T	-	T	C	T	T	T	T	T	T	T	T	Y	T	T	C	T	T	T	T	T	T	T	T	T	T	T	T	T	C	T	T	Y	T	T	T	T
Bn-A03-p7618555	T/C/-	A03	6914964	+	NA	NA	NA	NA	NA	NA	T	T	T	Y	T	C	C	T	T	T	T	T	T	T	C	T	T	C	T	T	T	T	T	T	T	T	T	T	T	T	C	C	T	T	C	T	T	T	T
Bn-A03-p7630376	A/G/-	A03	6931515	+	NA	NA	NA	NA	NA	NA	G	G	G	R	G	A	G	G	G	G	G	G	G	G	A	G	G	A	G	G	G	G	G	G	G	G	G	G	G	G	G	A	G	G	A	G	G	G	G
Bn-A03-p7630628	A/G/-	A03	6931767	+	NA	NA	NA	NA	NA	NA	G	G	G	R	G	A	G	G	G	G	G	G	G	G	A	G	G	A	G	G	G	G	G	G	G	G	G	G	G	G	G	A	G	G	A	G	G	G	G
Bn-A03-p7641673	A/G/-	A03	6942893	+	NA	NA	NA	NA	NA	NA	G	G	G	-	G	A	G	G	G	G	G	G	G	G	R	G	G	A	G	G	G	G	G	G	G	G	G	G	G	G	G	A	G	G	G	G	G	G	G
Bn-A03-p7642519	A/G/-	A03	6943367	+	NA	NA	NA	NA	NA	NA	G	G	G	G	G	A	G	G	G	G	G	G	G	G	-	G	G	A	G	G	G	G	G	G	G	G	G	G	G	G	G	A	G	G	G	G	G	G	G
Bn-A03-p7643795	A/G/-	A03	6944643	+	NA	NA	NA	NA	NA	NA	G	G	G	G	G	G	A	G	G	-	G	G	G	G	G	G	G	A	G	G	G	G	G	G	G	G	G	G	G	G	G	G	G	G	G	G	G	G	G
Bn-scaff_21312_1-p1156786	A/G/-	A03	6950848	+	NA	NA	NA	NA	NA	NA	R	R	R	R	R	A	A	-	R	G	G	G	G	G	A	R	G	A	G	G	G	G	R	G	R	R	R	G	G	-	A	A	G	G	A	R	R	G	G
Bn-A03-p7672403	T/G/-	A03	6972869	+	NA	NA	NA	NA	NA	NA	G	G	G	G	G	G	G	G	G	G	G	G	G	G	G	G	G	T	G	G	G	G	G	G	G	G	G	G	G	G	G	G	G	G	G	G	G	G	G
Bn-A03-p7675340	A/G/-	A03	6975802	+	NA	NA	NA	NA	NA	NA	A	A	A	A	A	A	A	A	A	A	A	A	A	A	A	A	A	A	A	A	A	A	A	A	A	A	A	A	A	A	A	A	A	A	A	A	A	A	A
Bn-A03-p7678159	A/C/-	A03	6980756	+	NA	NA	NA	NA	NA	NA	A	A	A	A	A	C	C	A	A	A	A	A	A	A	C	A	A	C	A	A	A	A	A	A	A	A	A	A	A	A	C	C	A	A	C	A	A	A	A
Bn-A03-p7685279	A/G/-	A03	6983861	+	NA	NA	NA	NA	NA	NA	A	A	A	A	A	G	G	A	A	A	A	A	A	A	G	A	A	G	A	A	A	A	A	A	A	A	A	A	A	A	G	G	A	A	G	A	A	A	A
Bn-A03-p7688578	A/G/-	A03	6987172	+	NA	NA	NA	NA	NA	NA	A	A	A	A	A	G	G	A	A	R	A	A	A	A	G	A	A	G	A	A	A	A	A	A	A	A	A	A	A	A	G	G	A	A	G	A	A	A	A
Bn-A03-p7773812	T/G/-	A03	7063566	+	NA	NA	NA	NA	NA	NA	G	G	G	G	G	G	G	G	G	T	G	G	G	G	G	G	G	T	G	G	G	G	G	G	G	G	G	G	G	G	G	G	G	G	G	G	G	G	G
Bn-A03-p7793076	A/G/-	A03	7085843	+	NA	NA	NA	NA	NA	NA	G	G	G	G	G	A	G	G	G	G	G	G	A	G	A	G	G	A	G	G	G	G	G	G	G	G	G	G	G	G	G	A	A	G	A	G	G	G	G
Bn-A03-p7806058	T/C/-	A03	7098942	+	NA	NA	NA	NA	NA	NA	T	T	T	C	C	C	C	C	C	-	T	C	C	T	C	C	Y	C	T	C	C	Y	C	C	T	T	T	C	T	T	C	C	T	T	C	T	T	C	C
Bn-A03-p7814324	T/C/-	A03	7104584	+	NA	NA	NA	NA	NA	NA	C	C	C	C	C	T	C	C	C	Y	C	C	T	C	T	C	C	T	C	C	C	C	C	C	C	C	C	C	C	C	C	C	C	C	T	C	C	C	C
Bn-A03-p7818081	T/C/-	A03	7108589	+	NA	NA	NA	NA	NA	NA	T	T	T	-	T	C	T	T	T	Y	T	T	C	T	C	T	T	C	T	T	T	T	T	T	T	T	T	T	T	T	T	T	T	T	C	T	T	T	T
Bn-A03-p7823490	T/G/-	A03	7115516	+	NA	NA	NA	NA	NA	NA	T	T	T	G	G	G	G	G	G	G	T	G	G	T	G	G	K	T	T	G	G	K	G	G	T	T	T	G	T	T	G	G	T	T	G	T	T	G	G
Bn-A03-p7840758	T/G/-	A03	7132811	+	NA	NA	NA	NA	NA	NA	T	T	T	G	G	T	G	G	G	T	T	G	G	T	T	G	K	G	T	G	G	K	G	G	T	T	T	G	T	T	G	G	T	T	K	T	T	G	G
Bn-A03-p7870307	T/C/-	A03	7158362	+	NA	NA	NA	NA	NA	NA	T	T	T	Y	C	T	C	C	C	T	T	C	C	T	T	C	Y	C	T	T	C	Y	C	C	T	T	T	C	T	T	C	C	T	T	Y	T	T	T	C
Bn-A03-p7870541	T/C/-	A03	7158596	+	NA	NA	NA	NA	NA	NA	C	C	C	-	T	C	T	T	T	C	C	T	T	C	C	T	Y	T	C	C	T	Y	T	T	C	C	C	T	C	C	T	T	C	C	Y	C	C	C	T
Bn-A03-p7873426	A/G/-	A03	7161482	+	NA	NA	NA	NA	NA	NA	A	A	A	G	G	A	G	G	G	A	A	G	G	A	A	G	-	G	A	A	G	R	G	G	A	A	A	G	A	A	G	G	A	A	R	A	A	A	G
Bn-A03-p7939679	T/C/-	A03	7219615	+	NA	NA	NA	NA	NA	NA	T	T	T	T	T	Y	T	T	T	Y	T	T	T	T	T	T	T	C	T	C	T	T	T	T	T	T	T	Y	T	T	Y	T	T	T	T	T	T	C	T
Bn-A03-p7964519	A/G/-	A03	7246042	+	NA	NA	NA	NA	NA	NA	A	A	A	A	A	A	A	A	A	A	A	A	A	A	A	A	A	G	A	A	A	A	A	A	A	A	A	A	A	A	A	A	A	A	A	A	A	A	A
Bn-A03-p7974602	A/C/-	A03	7256732	+	NA	NA	NA	NA	NA	NA	A	A	A	-	A	C	A	A	A	-	A	A	A	A	C	A	A	A	A	A	A	A	A	A	A	A	A	A	A	A	A	C	A	A	M	A	A	C	A
Bn-A03-p7988667	A/G/-	A03	7273645	+	NA	NA	NA	NA	NA	NA	G	G	G	G	G	A	G	G	G	R	G	G	G	G	A	G	G	G	G	G	G	G	G	G	G	G	G	G	G	G	G	G	G	G	-	G	G	A	G
Bn-A03-p8022406	T/C/-	A03	7311327	+	NA	NA	NA	NA	NA	NA	T	T	T	T	T	T	T	T	T	T	T	T	T	T	T	T	T	C	T	T	T	T	T	T	T	T	T	T	T	T	T	T	T	T	T	T	T	T	T
Bn-A03-p8032849	T/C/-	A03	7321711	+	NA	NA	NA	NA	NA	NA	T	T	T	T	T	T	T	T	T	T	T	T	T	T	T	T	T	C	T	C	T	T	T	T	T	T	T	T	T	T	T	T	T	T	T	T	T	T	T
Bn-A03-p8033095	T/C/-	A03	7321957	+	NA	NA	NA	NA	NA	NA	C	C	C	C	C	C	C	C	C	C	C	C	C	C	C	C	C	T	C	T	C	C	C	C	C	C	C	C	C	C	C	C	C	C	C	C	C	C	C
Bn-A03-p8039401	A/G/-	A03	7328269	+	NA	NA	NA	NA	NA	NA	A	A	A	R	A	G	A	A	A	G	A	A	A	A	G	A	A	G	A	G	A	A	A	A	A	A	A	A	A	A	A	A	A	A	R	A	A	A	A
Bn-A03-p8152842	A/G/-	A03	7448608	+	NA	NA	NA	NA	NA	NA	G	G	G	G	G	G	G	G	G	R	G	G	G	G	G	G	G	A	G	G	G	G	G	G	G	G	G	G	G	G	G	G	G	G	G	G	G	G	G
Bn-A03-p8158265	T/C/-	A03	7455575	+	NA	NA	NA	NA	NA	NA	T	T	T	T	T	T	C	Y	T	C	C	C	T	C	C	T	C	T	C	C	C	C	T	C	T	T	T	C	C	C	C	T	C	C	T	T	T	C	C
Bn-A03-p8177644	A/C/-	A03	7472583	+	NA	NA	NA	NA	NA	NA	C	C	C	C	C	A	C	C	C	C	C	C	C	C	A	C	C	A	C	C	C	C	C	C	C	C	C	C	C	C	C	C	C	C	C	C	C	C	C
Bn-A03-p8181187	T/G/-	A03	7488468	+	NA	NA	NA	NA	NA	NA	T	T	T	T	T	T	T	T	T	T	T	T	T	T	T	T	T	G	T	T	T	T	T	T	T	T	T	T	T	T	T	T	T	T	T	T	T	T	T
Bn-A03-p8181778	A/G/-	A03	7489059	+	NA	NA	NA	NA	NA	NA	G	G	G	G	G	G	G	G	G	G	G	G	G	G	G	G	G	A	G	G	G	G	G	G	G	G	G	G	G	G	G	G	G	G	G	G	G	G	G
Bn-A03-p8190847	A/C/-	A03	7501531	+	NA	NA	NA	NA	NA	NA	C	C	C	C	C	C	C	C	C	M	C	C	A	C	C	C	C	C	C	A	C	C	C	C	C	C	C	C	C	C	C	C	C	C	C	C	C	C	C
Bn-A03-p8282545	T/C/-	A03	7593171	+	NA	NA	NA	NA	NA	NA	C	C	C	T	C	T	T	-	Y	C	C	Y	C	C	T	T	T	T	C	C	T	C	C	C	C	C	C	C	C	C	C	C	C	C	Y	C	C	C	C
Bn-A03-p8308938	A/G/-	A03	7616979	+	NA	NA	NA	NA	NA	NA	G	G	G	G	G	G	G	G	G	G	G	G	G	G	G	G	G	A	G	G	G	G	G	G	G	G	G	G	G	G	G	G	G	G	G	G	G	G	G
Bn-A03-p8337135	T/C/-	A03	7646245	+	NA	NA	NA	NA	NA	NA	T	T	T	C	T	C	T	T	T	T	T	T	T	T	T	T	T	T	T	T	T	T	T	T	T	T	T	T	T	T	T	T	T	T	T	T	T	T	T
Bn-A03-p8359092	A/G/-	A03	7662887	+	NA	NA	NA	NA	NA	NA	G	G	G	G	A	G	A	A	-	A	A	A	A	A	A	G	A	A	A	A	A	A	A	A	G	G	G	A	A	A	A	A	A	A	A	G	G	A	A
Bn-A03-p8381012	A/C/-	A03	7693119	+	NA	NA	NA	NA	NA	NA	A	A	A	C	C	C	C	C	C	C	A	C	A	A	C	C	C	C	C	C	C	M	C	C	A	A	-	C	A	A	A	-	C	A	C	A	A	C	C
Bn-A03-p8395621	A/G/-	A03	7708793	+	NA	NA	NA	NA	NA	NA	G	G	G	G	A	G	A	A	A	A	G	A	G	G	A	A	A	A	A	A	A	R	A	A	G	G	G	A	G	G	G	A	A	G	-	G	G	A	A
Bn-A03-p8396525	T/C/-	A03	7709679	+	NA	NA	NA	NA	NA	NA	C	C	C	T	T	T	C	Y	Y	T	C	Y	C	C	T	C	C	T	T	T	C	Y	T	T	C	C	C	T	C	C	C	T	T	C	Y	C	C	T	T
Bn-A03-p8398790	T/G/-	A03	7711874	+	NA	NA	NA	NA	NA	NA	T	T	T	T	G	T	G	G	G	G	T	G	T	T	G	G	G	T	G	G	G	K	G	G	T	T	T	G	T	T	T	G	G	T	K	T	T	G	G
Bn-scaff_19248_1-p357191	A/G/-	A03	7720390	+	NA	NA	NA	NA	NA	NA	G	G	G	G	G	G	A	R	R	R	G	-	G	G	G	A	A	A	G	G	A	G	G	G	G	G	G	G	G	G	G	G	G	G	-	G	G	G	G
Bn-A03-p8475614	T/G/-	A03	7780069	+	NA	NA	NA	NA	NA	NA	G	G	G	G	G	G	T	T	K	T	T	T	T	T	T	G	T	T	T	T	T	T	G	T	G	G	G	T	T	T	T	T	T	T	T	G	G	T	T
Bn-scaff_19111_1-p140517	A/G/-	A03	7781672	+	NA	NA	NA	NA	NA	NA	G	G	G	-	G	A	A	R	R	G	G	R	A	G	G	A	A	A	G	G	A	G	G	G	G	G	G	G	G	G	G	G	G	G	G	G	G	A	G
Bn-A03-p8479803	T/C/-	A03	7784258	+	NA	NA	NA	NA	NA	NA	C	C	C	C	C	C	T	T	Y	T	T	T	T	T	T	C	T	T	T	T	T	T	C	T	C	C	C	T	T	T	T	T	T	T	T	C	C	T	T
Bn-A03-p8480669	A/G/-	A03	7785121	+	NA	NA	NA	NA	NA	NA	A	A	A	A	A	G	G	-	R	A	A	R	G	A	A	G	G	G	A	A	G	A	A	A	A	A	A	A	A	A	A	A	A	A	A	A	A	G	A
Bn-A03-p8483706	A/G/-	A03	7788161	+	NA	NA	NA	NA	NA	NA	A	A	A	-	A	G	G	R	-	R	A	-	G	A	A	G	G	A	A	A	G	A	A	A	A	A	-	-	A	A	G	-	A	A	A	A	A	G	-
Bn-A03-p8554739	A/G/-	A03	7848625	+	NA	NA	NA	NA	NA	NA	G	G	G	G	G	G	G	G	G	-	G	G	G	G	G	G	G	A	G	G	G	G	G	G	G	G	G	G	G	G	A	G	G	G	G	G	G	G	G
Bn-A03-p8559794	T/G/-	A03	7861441	+	NA	NA	NA	NA	NA	NA	T	T	T	K	T	G	T	T	T	T	T	T	T	T	T	T	T	G	T	T	T	T	T	T	T	T	T	T	T	T	T	T	T	T	T	T	T	G	T
Bn-A03-p8638217	A/C/-	A03	7927885	+	NA	NA	NA	NA	NA	NA	C	C	C	M	C	A	C	C	C	M	C	C	C	C	C	C	C	A	C	C	C	C	C	C	C	C	C	C	C	C	A	C	C	C	C	C	C	A	C
Bn-A03-p8645654	T/G/-	A03	7936433	+	NA	NA	NA	NA	NA	NA	G	G	G	G	G	T	G	G	G	G	G	G	G	G	G	G	G	T	G	G	G	G	G	G	G	G	G	G	G	G	T	G	G	G	G	G	G	T	G
Bn-A03-p8654614	T/C/-	A03	7944919	+	NA	NA	NA	NA	NA	NA	T	T	T	T	T	T	T	T	T	C	T	T	C	T	C	T	T	C	T	C	T	T	T	T	T	T	T	T	T	T	T	T	T	T	Y	T	T	T	T
Bn-A03-p8665794	T/G/-	A03	7957551	+	NA	NA	NA	NA	NA	NA	T	T	T	T	T	G	T	T	T	-	T	T	T	T	T	T	T	G	T	T	T	T	T	T	T	T	T	T	T	T	T	T	T	T	T	T	T	G	T
Bn-A03-p8671468	A/G/-	A03	7962824	+	NA	NA	NA	NA	NA	NA	A	A	A	A	A	G	A	A	A	G	A	A	G	A	G	A	A	G	G	G	A	A	A	A	A	A	A	A	A	A	G	A	A	A	A	A	A	G	A
Bn-A03-p8681690	A/G/-	A03	7968929	+	NA	NA	NA	NA	NA	NA	A	A	A	G	A	A	A	A	A	G	A	A	-	A	G	A	A	A	G	G	A	A	A	A	A	A	A	A	A	A	G	A	A	A	R	A	A	A	A
Bn-scaff_23954_1-p1038991	A/C/-	A03	7974190	+	NA	NA	NA	NA	NA	NA	C	C	C	M	C	A	C	C	C	M	C	C	C	C	C	C	C	A	C	C	C	C	C	C	C	C	C	C	C	C	C	C	C	C	C	C	C	A	C
Bn-A03-p8735039	A/C/-	A03	8024179	+	NA	NA	NA	NA	NA	NA	A	A	A	C	A	C	A	A	A	C	A	A	C	A	C	A	A	C	A	C	A	A	A	A	A	A	A	A	A	A	A	A	A	A	M	A	A	C	A
Bn-A03-p8741996	A/G/-	A03	8035724	+	NA	NA	NA	NA	NA	NA	G	G	G	R	G	A	G	G	G	G	G	G	G	G	G	G	G	A	G	G	G	G	G	G	G	G	G	G	G	G	G	G	G	G	G	G	G	A	G
Bn-A03-p8756590	A/G/-	A03	8052565	+	NA	NA	NA	NA	NA	NA	G	G	G	R	G	G	G	G	G	R	G	G	G	G	A	G	G	A	G	A	G	G	G	G	G	G	G	G	G	G	G	G	G	G	R	G	G	G	G
Bn-A03-p8764481	A/G/-	A03	8061100	+	NA	NA	NA	NA	NA	NA	G	G	G	R	G	G	G	G	G	R	G	G	G	G	A	G	G	A	G	A	G	G	G	G	G	G	G	G	G	G	G	G	G	G	R	G	G	G	G
Bn-A03-p8769576	T/G/-	A03	8065497	+	NA	NA	NA	NA	NA	NA	T	T	T	K	T	G	T	T	T	K	T	T	G	T	T	T	T	T	G	T	T	T	T	T	T	T	T	T	T	T	G	T	T	T	T	T	T	G	T
Bn-A03-p8812807	A/C/-	A03	8116341	+	NA	NA	NA	NA	NA	NA	A	A	A	A	A	A	A	A	A	A	A	A	A	A	A	A	A	C	A	A	A	A	A	A	A	A	A	A	A	A	A	A	A	A	A	A	A	A	A
Bn-A03-p8822734	T/C/-	A03	8127205	+	NA	NA	NA	NA	NA	NA	-	C	C	C	C	C	C	C	C	C	C	C	T	C	C	C	-	C	C	C	C	C	C	C	C	C	-	-	C	C	C	C	C	C	C	C	C	C	C
Bn-A03-p8833016	A/C/-	A03	8137479	+	NA	NA	NA	NA	NA	NA	A	A	A	-	A	A	A	A	A	M	A	A	A	A	C	A	A	C	A	C	A	A	A	A	A	A	A	A	A	A	A	A	A	A	M	A	A	A	A
Bn-A03-p8836751	T/C/-	A03	8139994	+	NA	NA	NA	NA	NA	NA	C	C	C	C	C	T	C	C	C	C	C	C	T	C	C	C	C	T	C	C	C	C	C	C	C	C	C	C	C	C	C	C	C	C	C	C	C	C	C
Bn-A03-p8842546	T/C/-	A03	8146927	+	NA	NA	NA	NA	NA	NA	C	C	C	C	C	C	C	C	C	C	C	C	C	C	C	C	C	C	C	C	C	C	C	C	C	C	C	C	C	C	C	C	C	C	C	C	C	C	C
Bn-A03-p8851043	A/G/-	A03	8156200	+	NA	NA	NA	NA	NA	NA	G	-	G	-	G	G	G	G	G	R	G	G	G	G	A	G	G	A	G	A	G	G	G	G	G	G	G	G	G	G	G	G	G	G	R	G	G	A	G
Bn-A03-p8851142	T/C/-	A03	8156299	+	NA	NA	NA	NA	NA	NA	T	T	T	Y	T	C	T	T	T	Y	T	T	C	T	T	T	T	T	C	T	T	C	T	C	T	T	T	T	T	T	C	T	T	T	T	T	T	T	T
Bn-A03-p8860638	A/G/-	A03	8164402	+	NA	NA	NA	NA	NA	NA	A	A	A	-	A	G	A	A	A	A	A	A	A	A	A	A	A	A	A	A	A	A	A	A	A	A	-	-	A	A	A	-	A	A	A	A	A	-	-
Bn-A03-p8861495	T/G/-	A03	8165263	+	NA	NA	NA	NA	NA	NA	G	G	G	G	G	G	G	G	G	G	G	G	T	G	G	G	G	G	G	G	G	G	G	G	G	G	G	G	G	G	G	G	G	G	G	G	G	G	G
Bn-A03-p8881377	A/C/-	A03	8182097	+	NA	NA	NA	NA	NA	NA	A	A	A	M	A	C	A	A	A	M	A	M	A	A	A	A	A	M	A	A	A	A	A	A	A	A	A	A	A	A	A	A	A	-	A	A	A	C	A
Bn-A03-p8881585	T/G/-	A03	8182308	+	NA	NA	NA	NA	NA	NA	T	T	T	-	T	G	T	T	T	T	T	T	T	T	T	T	T	T	T	T	T	T	T	T	T	T	T	T	T	T	T	T	T	T	T	T	T	G	T
Bn-A03-p8883782	T/C/-	A03	8184602	+	NA	NA	NA	NA	NA	NA	T	T	T	T	T	C	T	T	T	T	T	T	T	T	T	T	T	C	T	T	T	T	T	T	T	T	T	T	T	T	T	T	T	T	T	T	T	C	T
Bn-A03-p8897362	T/C/-	A03	8206306	+	NA	NA	NA	NA	NA	NA	T	T	T	Y	T	C	T	T	T	Y	T	T	C	T	T	T	T	T	C	T	T	C	T	C	T	T	T	T	T	T	T	T	T	T	T	T	T	C	T
Bn-scaff_23954_1-p622637	T/C/-	A03	8245393	+	NA	NA	NA	NA	NA	NA	C	C	C	C	C	T	C	C	C	C	C	C	T	C	C	C	C	T	C	C	C	C	C	C	C	C	C	C	C	C	T	C	C	C	C	C	C	T	C
Bn-A03-p8956355	T/C/-	A03	8260593	+	NA	NA	NA	NA	NA	NA	C	C	C	C	C	-	C	C	C	-	C	C	C	C	C	C	C	C	T	C	C	T	C	T	C	C	-	-	C	C	C	-	C	C	C	C	C	-	C
Bn-A03-p8957734	T/C/-	A03	8262044	+	NA	NA	NA	NA	NA	NA	C	C	C	C	C	C	C	C	C	C	C	C	C	C	C	C	C	C	T	C	C	T	C	T	C	C	C	C	C	C	C	C	C	C	C	C	C	C	C
Bn-A03-p8960332	T/C/-	A03	8264839	+	NA	NA	NA	NA	NA	NA	C	C	C	C	C	C	C	C	C	C	C	C	C	C	C	C	C	T	T	C	C	T	C	T	C	C	C	C	C	C	T	C	C	C	C	C	C	C	C
Bn-scaff_23954_1-p584900	T/G/-	A03	8265886	+	NA	NA	NA	NA	NA	NA	K	T	T	T	T	T	G	G	-	G	T	T	T	G	G	G	G	T	G	G	G	G	T	G	G	G	G	G	G	G	G	T	G	K	G	T	K	T	G
Bn-A03-p8973137	T/C/-	A03	8279673	+	NA	NA	NA	NA	NA	NA	T	T	T	Y	T	C	T	T	T	Y	T	T	C	T	T	T	T	T	C	T	T	C	T	C	T	T	T	T	T	T	T	T	T	T	T	T	T	T	T
Bn-A03-p9011966	A/G/-	A03	8309078	+	NA	NA	NA	NA	NA	NA	A	A	A	-	A	G	A	A	A	-	A	A	A	A	A	A	A	G	G	A	A	G	A	G	A	A	A	A	A	A	A	A	A	A	A	A	A	-	A
Bn-A03-p9020167	T/C/-	A03	8317529	+	NA	NA	NA	NA	NA	NA	C	C	C	-	C	T	C	C	C	Y	C	C	C	C	C	C	C	T	T	C	C	T	C	T	C	C	C	C	C	C	C	C	C	C	C	C	C	C	C
Bn-A03-p9020291	T/C/-	A03	8317653	+	NA	NA	NA	NA	NA	NA	C	C	C	Y	C	T	C	C	C	Y	C	C	C	C	C	C	C	T	T	C	C	T	C	T	C	C	C	C	C	C	C	C	C	C	C	C	C	C	C
Bn-A03-p9129107	A/G/-	A03	8414875	+	NA	NA	NA	NA	NA	NA	A	A	A	A	A	G	A	R	R	A	A	G	A	A	A	G	G	A	G	A	G	G	A	G	A	A	A	A	A	A	A	A	G	A	A	A	A	A	A
Bn-scaff_23954_1-p254934	A/G/-	A03	8415777	+	NA	NA	NA	NA	NA	NA	A	A	A	A	A	G	A	A	A	A	A	A	A	A	A	A	A	A	A	A	A	A	A	A	A	A	A	A	A	A	A	A	A	A	A	A	A	G	A
Bn-scaff_23954_1-p239074	A/G/-	A03	8425473	+	NA	NA	NA	NA	NA	NA	A	A	A	A	A	A	A	R	R	A	A	G	A	R	A	G	G	A	G	A	G	G	A	G	A	A	A	A	A	A	A	A	G	A	A	A	A	A	A
Bn-A03-p9143356	A/C/-	A03	8429021	+	NA	NA	NA	NA	NA	NA	A	A	A	A	A	A	A	M	M	M	A	C	A	M	A	C	C	A	C	A	C	C	A	C	A	A	A	A	A	A	A	A	C	A	A	A	A	A	A
Bn-A03-p9170934	T/C/-	A03	8454033	+	NA	NA	NA	NA	NA	NA	C	C	C	C	T	C	C	Y	Y	Y	C	T	C	Y	C	T	T	C	T	C	T	T	T	T	C	C	C	C	C	C	C	C	T	C	C	C	C	C	T
Bn-scaff_23954_1-p169806	T/G/-	A03	8462458	+	NA	NA	NA	NA	NA	NA	T	G	G	G	G	G	T	T	K	T	T	T	G	T	T	T	T	G	T	T	T	T	G	T	T	T	T	T	T	T	T	G	T	T	T	G	K	G	T
Bn-scaff_23954_1-p169729	T/C/-	A03	8462535	+	NA	NA	NA	NA	NA	NA	C	C	C	T	C	T	C	C	C	C	C	C	C	C	C	C	C	T	C	C	C	C	C	C	C	C	C	C	C	C	C	C	C	C	C	C	C	C	C
Bn-A03-p9186605	T/C/-	A03	8468062	+	NA	NA	NA	NA	NA	NA	T	T	T	T	T	T	T	T	T	T	T	T	T	T	T	T	T	T	T	T	T	T	T	T	T	T	T	T	T	T	T	T	T	T	T	T	T	T	T
Bn-A03-p9208735	T/C/-	A03	8487655	+	NA	NA	NA	NA	NA	NA	C	C	C	C	C	T	C	C	C	Y	C	C	C	Y	C	C	C	T	C	C	C	C	C	C	C	C	C	C	C	C	C	C	C	C	C	C	C	C	C
Bn-A03-p9243701	T/C/-	A03	8525585	+	NA	NA	NA	NA	NA	NA	T	T	T	T	-	T	T	Y	Y	-	T	C	T	Y	T	C	C	C	C	T	C	T	-	T	T	T	T	T	T	T	T	T	T	T	T	T	T	T	C
Bn-A03-p9244195	T/C/-	A03	8526078	+	NA	NA	NA	NA	NA	NA	T	T	T	T	C	T	T	Y	Y	Y	T	C	T	Y	T	C	C	C	C	T	C	T	C	T	T	T	T	T	T	T	T	T	T	T	T	T	T	T	C
Bn-A03-p9246222	T/C/-	A03	8528095	+	NA	NA	NA	NA	NA	NA	T	T	T	T	C	C	T	Y	Y	-	T	C	T	Y	T	C	C	C	C	T	C	T	C	T	T	T	T	T	T	T	T	T	T	T	T	T	T	T	C
Bn-A03-p9247798	T/C/-	A03	8529741	+	NA	NA	NA	NA	NA	NA	C	C	C	C	T	C	C	Y	Y	Y	C	T	C	Y	C	T	T	T	T	C	T	C	T	C	C	C	C	C	C	C	C	C	C	C	C	C	C	C	T
Bn-A03-p9250832	A/G/-	A03	8532801	+	NA	NA	NA	NA	NA	NA	G	G	G	G	A	G	G	R	R	G	G	A	G	R	G	A	A	G	A	G	A	G	A	G	G	G	G	G	G	G	G	G	G	G	G	G	G	G	A
Bn-A03-p9255139	T/G/-	A03	8536834	+	NA	NA	NA	NA	NA	NA	G	G	G	G	G	T	G	G	G	G	G	G	G	G	G	G	G	T	G	G	G	G	G	G	G	G	G	G	G	G	G	G	G	G	G	G	G	G	G
Bn-A03-p9265554	T/C/-	A03	8547292	+	NA	NA	NA	NA	NA	NA	T	T	T	T	C	C	T	Y	Y	-	T	C	T	Y	T	C	C	C	C	T	C	T	C	T	T	T	T	T	T	T	T	T	T	T	T	T	T	T	C
Bn-A03-p9300575	A/C/-	A03	8581203	+	NA	NA	NA	NA	NA	NA	A	A	A	A	A	A	C	A	A	M	A	A	A	C	A	A	A	A	A	A	A	A	A	A	A	A	A	A	A	A	A	A	A	A	A	A	A	A	A
Bn-A03-p9301541	A/C/-	A03	8583785	+	NA	NA	NA	NA	NA	NA	C	C	C	C	C	C	A	C	C	-	C	C	C	M	C	C	C	A	C	C	C	C	C	C	C	C	C	C	C	C	C	C	C	C	C	C	C	C	C
Bn-A03-p9304563	A/C/-	A03	8585990	+	NA	NA	NA	NA	NA	NA	A	A	A	A	A	A	C	A	A	-	A	A	A	M	A	A	A	C	A	A	A	A	A	A	A	A	A	A	A	A	A	A	A	A	A	A	A	A	A
Bn-A03-p9429437	A/G/-	A03	8702777	+	NA	NA	NA	NA	NA	NA	A	A	A	A	A	G	G	A	R	R	A	A	A	R	A	A	A	G	G	A	A	A	A	A	A	A	A	A	A	A	A	A	A	A	A	A	A	A	A
Bn-A03-p9468025	T/C/-	A03	8742060	+	NA	NA	NA	NA	NA	NA	T	T	T	T	T	T	C	T	T	Y	T	T	T	Y	T	T	T	T	C	T	T	C	T	C	T	T	T	T	T	T	T	T	T	T	Y	T	T	C	T
Bn-A03-p9480203	A/G/-	A03	8754199	+	NA	NA	NA	NA	NA	NA	A	A	A	A	A	G	A	A	R	A	A	A	A	A	A	A	A	G	G	A	A	A	A	A	A	A	A	A	A	A	A	A	A	A	A	A	A	A	A
Bn-A03-p9485365	T/C/-	A03	8759360	+	NA	NA	NA	NA	NA	NA	T	T	T	T	T	C	C	T	Y	T	T	T	T	T	T	T	T	C	C	T	T	C	T	C	T	T	T	T	T	T	T	T	T	T	Y	T	T	C	T
Bn-A03-p9488435	T/C/-	A03	8764345	+	NA	NA	NA	NA	NA	NA	T	T	T	T	T	C	C	T	Y	Y	T	T	T	Y	T	T	T	C	C	T	T	T	T	T	T	T	T	T	T	T	T	T	T	T	-	T	T	C	T
Bn-A03-p9497821	A/C/-	A03	8767398	+	NA	NA	NA	NA	NA	NA	C	C	C	C	C	C	A	C	C	M	C	C	C	M	C	C	C	C	A	C	C	C	C	C	C	C	C	C	C	C	C	C	C	C	M	C	C	A	C
Bn-A03-p9525820	T/C/-	A03	8797160	+	NA	NA	NA	NA	NA	NA	C	C	C	T	T	C	C	T	Y	T	C	T	T	C	T	T	T	C	C	T	T	T	T	T	C	C	C	T	C	C	T	T	T	C	Y	C	C	C	T
Bn-A03-p9537155	T/C/-	A03	8807186	+	NA	NA	NA	NA	NA	NA	T	T	C	C	C	T	C	C	Y	C	C	C	C	Y	C	C	C	T	C	C	C	C	C	C	Y	C	T	C	T	T	C	C	C	T	C	C	C	C	C
Bn-A03-p9567767	A/G/-	A03	8832145	+	NA	NA	NA	NA	NA	NA	A	A	A	A	A	A	G	A	A	R	A	A	A	R	A	A	A	A	G	A	A	G	A	G	A	A	A	A	A	A	A	A	A	A	R	A	A	G	A
Bn-A03-p9637487	T/C/-	A03	8872075	+	NA	NA	NA	NA	NA	NA	T	T	T	T	T	C	C	T	Y	T	T	T	T	T	T	T	T	T	C	T	T	T	T	T	T	T	T	T	T	T	T	T	T	T	T	T	T	T	T
Bn-A03-p9638708	T/G/-	A03	8873301	+	NA	NA	NA	NA	NA	NA	G	G	G	G	G	T	T	G	K	G	G	G	G	K	G	G	G	G	T	G	G	G	G	G	G	G	G	G	G	G	G	G	G	G	G	G	G	G	G
Bn-A03-p9638726	T/C/-	A03	8873319	+	NA	NA	NA	NA	NA	NA	T	T	T	T	T	C	C	T	Y	T	T	T	T	Y	T	T	T	T	C	T	T	T	T	T	T	T	T	T	T	T	T	T	T	T	T	T	T	T	T
Bn-A03-p9641671	A/G/-	A03	8876213	+	NA	NA	NA	NA	NA	NA	G	G	G	G	G	A	A	G	R	R	G	G	G	R	G	G	G	G	A	G	G	A	G	A	G	G	G	G	G	G	G	G	G	G	G	G	G	G	G
Bn-A03-p9651526	A/G/-	A03	8886077	+	NA	NA	NA	NA	NA	NA	A	A	A	A	A	G	G	A	R	R	A	A	A	A	A	A	A	G	G	A	A	G	A	G	A	A	A	A	A	A	A	A	A	A	A	A	A	A	A
Bn-A03-p9657864	A/G/-	A03	8892369	+	NA	NA	NA	NA	NA	NA	A	A	A	A	A	A	G	A	A	A	A	A	A	A	A	A	A	G	G	A	A	A	A	A	A	A	A	A	A	A	A	A	A	A	A	A	A	A	A
Bn-A03-p9677969	A/G/-	A03	8902583	+	NA	NA	NA	NA	NA	NA	G	G	G	G	G	A	A	R	A	R	G	G	G	R	G	G	G	A	A	G	G	A	G	A	G	G	G	A	G	G	A	G	G	G	G	G	G	G	G
Bn-A03-p9678981	A/G/-	A03	8903582	+	NA	NA	NA	NA	NA	NA	A	A	A	A	A	G	G	R	G	A	A	A	A	R	A	A	A	G	G	A	A	G	A	G	A	A	A	G	A	A	G	A	A	A	A	A	A	A	A
Bn-A03-p9680882	A/G/-	A03	8904075	+	NA	NA	NA	NA	NA	NA	A	A	A	A	A	G	G	R	G	-	A	A	A	R	A	A	A	G	G	A	A	G	A	G	A	A	A	G	A	A	G	A	A	A	A	A	A	A	A
Bn-A03-p9734588	T/C/-	A03	8962400	+	NA	NA	NA	NA	NA	NA	T	T	T	T	T	T	T	Y	Y	T	T	T	T	T	T	T	T	T	T	T	T	C	T	C	T	T	T	C	T	T	T	T	T	T	T	T	T	T	T
Bn-scaff_16002_1-p1916889	A/G/-	A03	8984522	+	NA	NA	NA	NA	NA	NA	A	A	A	A	A	A	A	-	R	A	A	A	G	A	A	A	A	A	A	A	A	G	A	G	A	A	A	G	A	A	A	G	A	A	A	A	A	A	A
Bn-A03-p9765420	A/C/-	A03	8996440	+	NA	NA	NA	NA	NA	NA	C	C	C	C	C	C	C	M	M	C	C	C	A	C	C	C	C	C	C	C	C	A	C	A	C	C	C	A	C	C	C	A	C	C	C	C	C	C	C
Bn-A03-p9847680	T/C/-	A03	9067103	+	NA	NA	NA	NA	NA	NA	T	T	T	T	T	T	T	T	T	-	T	T	C	T	T	T	T	C	C	T	T	T	T	T	T	T	T	T	T	T	T	C	T	T	T	T	T	T	T
Bn-A03-p9856465	A/G/-	A03	9075597	+	NA	NA	NA	NA	NA	NA	G	G	G	G	G	G	G	G	G	G	G	G	A	G	G	G	G	G	A	G	G	G	G	G	G	G	G	G	G	G	G	A	G	G	G	G	G	G	G
Bn-A03-p9863138	A/G/-	A03	9079560	+	NA	NA	NA	NA	NA	NA	A	A	G	G	G	G	G	G	G	G	G	G	A	R	G	G	G	G	A	G	G	G	G	G	R	G	A	G	A	A	G	A	G	A	G	G	G	G	G
Bn-A03-p9863600	A/G/-	A03	9080021	+	NA	NA	NA	NA	NA	NA	A	A	G	G	G	G	G	G	G	G	G	G	A	R	G	G	G	G	A	G	G	G	G	G	R	G	A	G	A	A	G	A	G	A	G	G	G	G	G
Bn-A03-p9869156	T/C/-	A03	9085530	+	NA	NA	NA	NA	NA	NA	C	C	C	T	T	T	T	T	T	T	C	T	T	Y	T	T	T	C	C	T	T	T	T	T	C	C	C	T	C	C	C	T	T	C	T	C	C	T	T
Bn-A03-p9873327	A/G/-	A03	9088253	+	NA	NA	NA	NA	NA	NA	A	A	A	A	A	A	A	A	A	A	A	A	A	A	A	A	A	G	A	A	A	A	A	A	A	A	A	A	A	A	A	A	A	A	A	A	A	A	A
Bn-A03-p9873384	T/C/-	A03	9088310	+	NA	NA	NA	NA	NA	NA	C	C	Y	T	T	T	T	T	T	Y	Y	T	T	Y	T	T	T	T	C	T	T	T	T	T	C	Y	C	T	C	C	C	T	T	C	T	C	C	T	T
Bn-A03-p9876378	T/C/-	A03	9091356	+	NA	NA	NA	NA	NA	NA	-	C	T	T	C	T	T	Y	T	Y	T	C	C	Y	T	C	C	T	C	T	C	T	C	T	Y	T	-	T	C	-	C	C	T	C	T	T	T	T	C
Bn-A03-p9899417	T/G/-	A03	9108751	+	NA	NA	NA	NA	NA	NA	G	G	T	T	G	G	G	K	G	K	T	G	G	K	T	G	G	T	G	T	G	T	G	T	K	T	G	T	G	G	G	G	T	G	T	T	T	T	G
Bn-A03-p9920847	T/C/-	A03	9122692	+	NA	NA	NA	NA	NA	NA	C	C	T	T	C	C	C	Y	-	-	T	C	C	Y	T	C	C	C	C	T	C	T	C	T	Y	T	C	T	C	C	C	C	T	C	T	T	T	T	C
Bn-A03-p9921379	A/G/-	A03	9123286	+	NA	NA	NA	NA	NA	NA	G	G	A	A	G	G	G	R	R	R	A	G	G	R	A	G	G	G	G	A	G	A	G	A	R	A	G	A	G	G	G	G	A	G	A	A	A	A	G
Bn-A03-p9939018	T/C/-	A03	9139698	+	NA	NA	NA	NA	NA	NA	C	C	C	C	T	C	T	Y	Y	C	C	Y	T	C	C	T	T	C	C	C	T	C	T	C	C	C	C	C	C	C	C	T	C	C	C	C	C	C	Y
Bn-A03-p10008905	T/C/-	A03	9203392	+	NA	NA	NA	NA	NA	NA	T	T	C	T	T	T	C	Y	-	C	C	T	T	Y	C	T	T	T	T	C	T	C	T	C	Y	C	T	C	T	T	T	T	C	T	C	C	C	C	T
Bn-A03-p10010569	A/C/-	A03	9204998	+	NA	NA	NA	NA	NA	NA	A	A	A	A	A	A	A	A	A	A	A	A	A	A	A	A	A	A	A	A	A	A	A	A	A	A	A	A	A	A	A	A	A	A	A	A	A	A	A
Bn-A03-p10011955	A/C/-	A03	9206397	+	NA	NA	NA	NA	NA	NA	A	A	A	A	A	A	A	A	A	A	A	A	A	A	A	A	A	C	A	A	A	A	A	A	A	A	A	A	A	A	A	A	A	A	A	A	A	A	A
Bn-A03-p10081359	T/G/-	A03	9279083	+	NA	NA	NA	NA	NA	NA	G	G	G	G	G	G	T	G	G	G	G	G	T	G	G	G	G	T	G	G	G	G	G	G	G	G	G	G	G	G	G	T	G	G	G	G	G	G	G
Bn-A03-p10092885	A/G/-	A03	9290598	+	NA	NA	NA	NA	NA	NA	G	G	G	G	G	G	A	G	G	G	G	G	A	G	G	G	G	A	G	G	G	G	G	G	G	G	G	G	G	G	G	A	G	G	G	G	G	G	G
Bn-A03-p10117543	A/C/-	A03	9317607	+	NA	NA	NA	NA	NA	NA	C	C	C	C	A	C	C	M	C	A	C	A	C	M	A	A	A	C	C	C	A	A	A	A	C	C	C	C	C	C	A	C	C	C	M	C	C	C	A
Bn-A03-p10129836	T/C/-	A03	9330550	+	NA	NA	NA	NA	NA	NA	T	T	C	T	T	T	T	T	Y	Y	C	T	T	T	C	T	T	C	T	C	T	T	T	T	Y	C	T	T	T	T	T	T	T	T	C	C	C	C	T
Bn-A03-p10130816	T/G/-	A03	9331524	+	NA	NA	NA	NA	NA	NA	G	G	G	G	G	G	G	G	G	G	G	G	G	G	G	G	G	T	G	G	G	G	G	G	G	G	G	G	G	G	G	G	G	G	G	G	G	G	G
Bn-A03-p10285809	A/G/-	A03	9459111	+	NA	NA	NA	NA	NA	NA	G	G	A	G	G	G	G	G	R	G	A	G	G	G	G	G	G	G	G	G	G	G	G	G	R	A	G	G	A	G	G	G	G	G	G	A	A	G	G
Bn-A03-p10288202	A/G/-	A03	9461503	+	NA	NA	NA	NA	NA	NA	G	G	A	G	G	G	G	G	R	G	A	G	G	G	G	G	G	A	G	G	G	G	G	G	R	A	G	G	A	G	G	G	G	G	G	A	A	G	G
Bn-A03-p10342088	A/C/-	A03	9513161	+	NA	NA	NA	NA	NA	NA	C	C	A	C	C	C	C	C	M	C	A	C	C	C	C	C	C	A	C	-	C	C	C	C	M	A	C	C	A	C	C	C	C	C	C	A	A	C	C
Bn-A03-p10355167	A/G/-	A03	9530262	+	NA	NA	NA	NA	NA	NA	A	A	A	A	A	A	A	A	R	A	A	A	A	A	A	A	A	G	A	G	A	A	A	A	A	A	A	-	A	A	A	A	A	A	A	A	A	A	A
Bn-A03-p10393461	A/G/-	A03	9578174	+	NA	NA	NA	NA	NA	NA	A	A	A	A	A	A	A	A	A	A	A	A	A	A	A	A	A	A	A	G	A	A	A	A	A	A	A	A	A	A	A	A	A	A	A	A	A	A	A
Bn-A03-p10402639	T/G/-	A03	9586963	+	NA	NA	NA	NA	NA	NA	G	G	G	G	G	G	G	G	G	G	G	G	G	G	G	G	G	T	G	G	G	G	G	G	G	G	G	G	G	G	G	G	G	G	G	G	G	G	G
Bn-A03-p10414176	T/C/-	A03	9598534	+	NA	NA	NA	NA	NA	NA	T	T	T	C	T	C	Y	T	T	T	C	T	Y	T	T	T	T	T	T	T	-	T	T	T	Y	C	T	-	C	T	T	Y	T	T	Y	C	C	C	-
Bn-A03-p10448318	T/G/-	A03	9632422	+	NA	NA	NA	NA	NA	NA	T	T	T	T	T	T	T	T	T	T	T	T	T	T	T	T	T	G	T	T	T	T	T	T	T	T	T	T	T	T	T	T	T	T	T	T	T	T	T
Bn-A03-p10464551	T/C/-	A03	9638955	+	NA	NA	NA	NA	NA	NA	T	T	T	T	T	T	T	T	T	C	T	T	T	T	C	T	T	T	T	C	T	C	T	C	T	T	T	T	T	T	T	T	T	T	Y	T	T	T	T
Bn-A03-p10458923	T/C/-	A03	9642962	+	NA	NA	NA	NA	NA	NA	C	C	C	C	C	C	C	C	C	T	C	C	C	C	T	C	C	T	C	T	C	T	C	T	C	C	C	C	C	C	C	C	C	C	Y	C	C	C	C
Bn-A03-p10482765	A/G/-	A03	9654114	+	NA	NA	NA	NA	NA	NA	A	A	A	G	A	G	G	A	A	A	G	A	G	A	A	A	A	G	A	G	A	G	A	G	R	G	A	A	G	A	A	G	A	A	R	G	G	G	A
Bn-A03-p10533775	T/C/-	A03	9713101	+	NA	NA	NA	NA	NA	NA	T	T	T	T	T	T	T	T	T	T	T	T	T	T	T	T	T	T	T	C	T	C	T	C	T	T	T	T	T	T	T	T	T	T	T	T	T	T	T
Bn-A03-p10547280	A/G/-	A03	9728137	+	NA	NA	NA	NA	NA	NA	G	G	G	A	G	A	A	G	G	G	A	G	A	G	G	G	G	A	G	G	G	G	G	G	R	A	G	G	A	G	G	A	G	G	R	A	A	A	G
Bn-A03-p10562274	T/G/-	A03	9742807	+	NA	NA	NA	NA	NA	NA	T	T	T	T	T	T	T	T	T	G	T	T	T	T	G	T	T	G	T	T	T	T	T	T	T	T	T	T	T	T	T	T	T	T	K	T	T	T	T
Bn-A03-p10565738	T/C/-	A03	9746276	+	NA	NA	NA	NA	NA	NA	C	C	C	C	C	T	T	C	C	Y	T	C	T	C	T	C	C	T	C	C	C	C	C	C	Y	T	C	C	T	C	C	T	C	C	T	T	T	T	C
Bn-A03-p10566503	A/G/-	A03	9747036	+	NA	NA	NA	NA	NA	NA	G	G	G	G	G	A	A	G	G	R	A	G	A	G	A	G	G	A	G	G	G	G	G	G	R	A	G	G	A	G	G	A	G	G	A	A	A	A	G
Bn-scaff_16002_1-p580789	A/G/-	A03	9747806	+	NA	NA	NA	NA	NA	NA	A	A	A	A	A	R	G	A	A	A	G	A	-	A	A	A	A	G	A	A	A	A	A	A	R	G	A	A	G	A	A	-	A	A	R	G	G	R	A
Bn-A03-p10641836	T/G/-	A03	9795429	+	NA	NA	NA	NA	NA	NA	T	T	T	T	T	G	G	T	T	T	T	T	G	T	T	T	T	G	T	T	T	T	T	T	T	T	T	T	T	T	T	G	T	T	K	T	T	G	T
Bn-A03-p10649410	A/C/-	A03	9805971	+	NA	NA	NA	NA	NA	NA	C	C	C	A	C	A	A	C	C	C	A	C	A	C	C	C	C	A	C	C	C	C	C	C	M	A	C	C	A	C	C	A	C	C	M	A	A	A	C
Bn-A03-p10651420	T/C/-	A03	9808008	+	NA	NA	NA	NA	NA	NA	C	C	C	T	C	C	C	C	C	C	T	C	C	C	C	C	C	C	C	C	C	C	C	C	Y	T	C	C	T	C	C	C	C	C	C	T	T	C	C
Bn-A03-p10680539	A/C/-	A03	9833573	+	NA	NA	NA	NA	NA	NA	A	A	A	A	A	C	C	A	A	A	A	A	C	A	A	A	A	C	A	A	A	A	A	A	A	A	A	A	A	A	A	C	A	A	A	A	A	A	A
Bn-A03-p10682159	A/G/-	A03	9835193	+	NA	NA	NA	NA	NA	NA	A	A	A	A	A	G	G	A	A	A	A	A	G	A	A	A	A	A	A	A	A	A	A	A	A	A	A	A	A	A	A	G	A	A	A	A	A	A	A
Bn-A03-p10692514	A/C/-	A03	9850617	+	NA	NA	NA	NA	NA	NA	C	C	C	A	C	C	C	C	C	C	A	C	C	C	C	C	C	C	C	C	C	C	C	C	M	A	C	C	A	C	C	C	C	C	C	A	A	C	C
Bn-scaff_16002_1-p329748	A/G/-	A03	9869337	+	NA	NA	NA	NA	NA	NA	A	A	A	G	A	A	A	R	R	A	A	A	A	A	A	A	A	A	A	A	A	A	A	A	A	A	A	R	A	A	A	A	A	A	A	A	A	A	A
Bn-A03-p10749391	T/C/-	A03	9910331	+	NA	NA	NA	NA	NA	NA	C	C	C	C	C	C	C	Y	Y	T	C	C	C	C	C	C	C	C	C	C	C	C	C	C	C	C	C	T	C	C	C	C	C	C	C	C	C	C	C
Bn-A03-p10761386	T/C/-	A03	9925979	+	NA	NA	NA	NA	NA	NA	C	C	C	T	C	C	C	Y	-	Y	T	C	C	C	C	C	C	T	C	C	C	C	C	C	Y	T	C	Y	T	C	C	C	C	C	C	T	T	C	C
Bn-A03-p10773321	A/G/-	A03	9945815	+	NA	NA	NA	NA	NA	NA	G	G	G	A	G	G	G	G	G	R	A	G	G	G	G	G	G	G	G	G	G	G	G	G	R	A	G	G	A	G	G	G	G	G	G	A	A	G	G
Bn-A03-p10773339	T/C/-	A03	9945833	+	NA	NA	NA	NA	NA	NA	C	C	C	T	C	C	C	C	C	Y	T	C	C	C	C	C	C	C	C	C	C	C	C	C	Y	T	C	C	T	C	C	C	C	C	C	T	T	C	C
Bn-A03-p10794985	T/G/-	A03	9965011	+	NA	NA	NA	NA	NA	NA	T	T	T	T	T	T	T	K	K	K	T	T	T	G	T	T	T	G	T	T	T	T	T	T	T	T	T	-	T	T	T	T	T	T	T	T	T	T	T
Bn-A03-p10797405	A/C/-	A03	9967476	+	NA	NA	NA	NA	NA	NA	A	A	A	C	A	A	A	A	A	A	C	A	A	A	A	A	A	A	A	A	A	A	A	A	M	C	A	A	C	A	-	A	A	A	A	C	C	A	A
Bn-A03-p10802728	T/C/-	A03	9973103	+	NA	NA	NA	NA	NA	NA	C	C	C	T	C	C	C	C	C	C	T	C	C	C	C	C	C	T	C	C	C	C	C	C	-	T	C	C	T	C	C	C	C	C	C	T	T	C	C
Bn-A03-p10803927	T/C/-	A03	9974301	+	NA	NA	NA	NA	NA	NA	C	C	C	T	C	C	C	C	C	C	T	C	C	C	C	C	C	C	C	C	C	C	C	C	Y	T	C	C	T	C	C	C	C	C	C	T	T	C	C
Bn-A03-p10823720	T/C/-	A03	9994797	+	NA	NA	NA	NA	NA	NA	T	T	T	C	T	T	T	T	T	T	C	T	T	T	T	T	T	T	T	T	T	T	T	T	Y	C	T	T	C	T	T	T	T	T	T	C	C	T	T
Bn-A03-p10830360	A/C/-	A03	9999932	+	NA	NA	NA	NA	NA	NA	C	C	C	A	C	C	C	C	C	C	A	C	C	C	C	C	C	C	C	C	C	C	C	C	-	A	C	C	A	C	C	C	C	C	C	A	A	C	C
Bn-A03-p11053758	T/C/-	A03	10172163	+	NA	NA	NA	NA	NA	NA	C	C	C	C	C	C	C	Y	Y	Y	T	C	C	C	C	C	C	T	C	C	C	C	C	C	Y	T	C	Y	T	C	C	C	C	C	C	T	T	C	C
Bn-A03-p11053857	A/G/-	A03	10172281	+	NA	NA	NA	NA	NA	NA	A	A	G	G	G	G	G	R	R	R	A	G	G	A	G	G	G	G	G	G	G	G	G	G	A	A	A	R	A	G	G	G	G	G	G	A	A	G	G
Bn-A03-p11156293	T/C/-	A03	10261429	+	NA	NA	NA	NA	NA	NA	T	T	T	T	T	T	T	Y	Y	C	C	T	T	T	T	T	T	-	T	C	T	T	T	T	Y	C	T	C	C	T	T	T	T	T	T	C	C	T	T
Bn-A03-p11171067	A/C/-	A03	10269510	+	NA	NA	NA	NA	NA	NA	A	A	A	-	A	A	A	A	A	C	A	A	A	A	A	A	A	A	A	C	A	A	A	A	A	A	A	A	A	A	A	A	A	A	A	A	A	A	A
Bn-Scaffold010519-p163	A/G/-	A03	10270143	+	NA	NA	NA	NA	NA	NA	A	A	G	G	G	G	G	R	R	G	A	G	G	A	G	G	G	A	G	G	G	G	G	G	A	A	A	A	A	G	G	G	G	G	G	A	A	G	G
Bn-Scaffold001128-p1186	T/C/-	A03	10272857	+	NA	NA	NA	NA	NA	NA	T	T	C	C	C	C	C	C	C	C	C	C	C	T	C	C	C	T	C	C	C	C	C	C	Y	C	T	C	C	C	C	C	C	C	C	C	C	C	C
Bn-A03-p11177892	A/G/-	A03	10280270	+	NA	NA	NA	NA	NA	NA	A	A	G	-	G	G	G	R	R	A	A	G	G	A	G	G	G	A	G	A	G	G	G	G	A	A	A	A	A	A	G	G	G	G	G	A	A	G	G
Bn-A03-p11217606	T/C/-	A03	10339936	+	NA	NA	NA	NA	NA	NA	T	T	T	Y	T	T	T	T	Y	C	T	T	T	T	T	T	T	T	T	C	T	T	T	T	T	T	T	Y	T	T	T	T	T	T	T	T	T	T	T
Bn-A03-p11227755	A/G/-	A03	10352316	+	NA	NA	NA	NA	NA	NA	G	G	G	G	G	G	G	G	R	A	G	G	G	G	G	G	G	G	G	A	G	G	G	G	G	G	G	G	G	G	G	G	G	G	G	G	G	G	G
Bn-A03-p11232586	T/G/-	A03	10358437	+	NA	NA	NA	NA	NA	NA	G	G	G	G	G	G	G	G	K	T	G	G	G	G	G	G	G	T	G	T	G	G	G	G	G	G	G	K	G	G	G	G	G	G	G	G	G	G	G
Bn-A03-p11247615	A/G/-	A03	10372840	+	NA	NA	NA	NA	NA	NA	A	A	A	R	A	A	A	A	R	G	A	A	A	A	A	A	A	A	A	G	A	A	A	A	A	A	A	R	A	A	A	A	A	A	A	A	A	A	A
Bn-A03-p11256392	T/C/-	A03	10381626	+	NA	NA	NA	NA	NA	NA	C	C	T	Y	T	T	T	T	T	C	C	T	T	C	T	T	T	C	T	T	T	T	T	T	C	C	C	T	C	C	T	T	T	T	T	C	C	T	T
Bn-A03-p11256664	T/C/-	A03	10381903	+	NA	NA	NA	NA	NA	NA	T	T	C	C	C	C	C	C	C	Y	T	C	C	T	C	C	C	C	C	C	C	C	C	C	T	T	T	C	T	T	C	C	C	C	C	T	T	C	C
Bn-A03-p11257708	T/C/-	A03	10382967	+	NA	NA	NA	NA	NA	NA	T	T	C	-	C	C	C	C	C	Y	T	C	C	T	C	C	C	C	C	C	C	C	C	C	T	T	T	C	T	T	C	C	C	C	C	T	T	C	C
Bn-A03-p11319722	A/C/-	A03	10434294	+	NA	NA	NA	NA	NA	NA	C	C	A	-	A	A	A	A	A	A	A	A	A	C	A	A	A	A	A	A	A	A	A	A	M	A	C	A	A	C	A	A	A	A	A	A	A	A	A
Bn-A03-p11345845	A/C/-	A03	10458203	+	NA	NA	NA	NA	NA	NA	A	A	C	C	C	C	C	C	C	C	C	C	C	A	C	C	C	C	C	C	C	C	C	C	M	C	A	C	C	A	C	C	C	C	C	C	C	C	C
Bn-A03-p11356180	T/C/-	A03	10465750	+	NA	NA	NA	NA	NA	NA	T	T	C	Y	C	C	C	C	C	C	C	C	T	T	C	C	C	C	C	C	C	C	C	C	Y	C	T	C	C	T	C	C	T	C	C	C	C	C	C
Bn-scaff_22466_1-p980721	A/G/-	A03	10475754	+	NA	NA	NA	NA	NA	NA	A	A	A	A	A	A	A	A	A	A	G	A	A	A	A	A	A	G	-	A	A	A	A	A	R	G	A	A	G	A	A	A	A	A	A	G	G	A	A
Bn-A03-p11381125	A/G/-	A03	10496225	+	NA	NA	NA	NA	NA	NA	G	G	A	R	A	A	A	A	A	-	G	A	G	G	A	A	A	G	A	A	A	A	A	A	G	G	G	A	G	G	A	A	G	A	A	G	G	A	A
Bn-A03-p11383138	A/G/-	A03	10501143	+	NA	NA	NA	NA	NA	NA	A	A	G	G	G	G	G	G	G	R	A	G	A	A	G	G	G	A	G	G	G	G	G	G	A	A	A	G	A	A	G	G	A	G	G	A	A	G	G
Bn-A03-p11399915	A/G/-	A03	10522683	+	NA	NA	NA	NA	NA	NA	A	A	G	G	G	G	G	G	G	R	G	G	G	A	G	G	G	G	G	G	G	G	G	G	R	G	A	G	G	A	G	G	A	G	G	G	G	G	G
Bn-A03-p11456115	A/G/-	A03	10586577	+	NA	NA	NA	NA	NA	NA	A	A	G	-	G	A	A	R	G	R	G	G	A	A	R	G	A	G	G	G	G	A	G	A	R	G	A	R	G	A	A	A	G	G	G	G	G	A	G
Bn-A03-p11515810	A/C/-	A03	10647480	+	NA	NA	NA	NA	NA	NA	C	C	C	-	C	C	C	C	M	C	C	C	C	C	C	C	C	C	C	C	C	C	C	C	C	C	C	M	C	C	C	C	C	C	C	C	C	C	C
Bn-A03-p11517597	A/G/-	A03	10650375	+	NA	NA	NA	NA	NA	NA	G	G	A	A	G	G	G	R	A	G	G	A	G	G	A	A	G	G	A	A	A	A	G	A	G	G	G	G	G	G	G	G	A	A	A	G	G	G	G
Bn-A03-p11519264	T/G/-	A03	10652033	+	NA	NA	NA	NA	NA	NA	T	T	G	G	T	T	T	K	G	K	T	G	T	T	G	G	T	T	G	G	G	G	T	G	T	T	T	K	T	T	T	T	G	G	G	T	T	T	T
Bn-scaff_22466_1-p1427346	A/C/-	A03	10663044	+	NA	NA	NA	NA	NA	NA	A	A	C	C	A	A	A	C	C	M	A	C	A	A	C	C	A	A	C	C	C	C	A	C	A	A	A	M	A	A	A	A	C	C	C	A	A	A	A
Bn-A03-p11534030	A/C/-	A03	10666064	+	NA	NA	NA	NA	NA	NA	C	C	C	-	C	C	C	C	C	C	C	C	C	C	C	C	C	A	C	C	C	C	C	C	C	C	-	-	C	C	C	-	C	C	C	C	C	C	C
Bn-A03-p11549018	T/C/-	A03	10676837	+	NA	NA	NA	NA	NA	NA	T	T	C	C	T	T	T	C	C	C	T	C	T	T	C	C	T	C	C	C	C	C	T	C	T	T	T	-	T	T	T	-	C	C	C	T	T	-	T
Bn-A03-p11549288	A/G/-	A03	10677109	+	NA	NA	NA	NA	NA	NA	G	G	A	A	G	G	G	R	A	A	G	A	G	G	A	A	G	G	A	A	A	A	G	A	G	G	G	-	G	G	G	G	A	A	A	G	G	G	G
Bn-A03-p11572347	T/C/-	A03	10694785	+	NA	NA	NA	NA	NA	NA	T	T	C	C	T	T	T	C	C	Y	T	C	T	T	C	C	T	C	C	C	C	C	T	C	T	T	T	Y	T	T	T	T	C	C	C	T	T	T	T
Bn-A03-p11578563	A/C/-	A03	10701503	+	NA	NA	NA	NA	NA	NA	A	A	C	C	A	A	A	M	C	C	A	C	A	A	C	C	A	A	C	C	C	C	A	C	A	A	A	A	A	A	A	A	C	C	C	A	A	A	A
Bn-scaff_16352_1-p17155	A/G/-	A03	10706965	+	NA	NA	NA	NA	NA	NA	A	A	G	-	A	A	A	-	G	G	A	G	A	A	G	G	A	G	G	G	G	G	A	G	A	A	A	R	A	A	A	A	G	G	G	A	A	A	A
Bn-scaff_16352_1-p46887	A/C/-	A03	10717902	+	NA	NA	NA	NA	NA	NA	C	C	C	C	C	C	C	C	C	-	C	C	C	C	C	C	C	C	C	C	C	C	C	C	C	C	C	C	C	C	C	C	C	C	C	C	C	C	C
Bn-A03-p11605644	T/C/-	A03	10739526	+	NA	NA	NA	NA	NA	NA	C	C	T	T	C	C	C	T	T	Y	C	T	C	C	T	T	C	T	T	T	T	T	C	T	C	C	C	Y	C	C	C	C	T	T	T	C	C	C	C
Bn-A03-p11613167	A/G/-	A03	10746041	+	NA	NA	NA	NA	NA	NA	G	G	A	A	G	G	G	A	A	-	G	A	G	G	A	A	G	G	A	G	A	A	G	A	G	G	G	R	G	G	G	G	A	A	A	G	G	G	G
Bn-A03-p11655161	T/G/-	A03	10790390	+	NA	NA	NA	NA	NA	NA	T	T	T	T	T	T	T	T	T	T	G	T	G	T	T	T	T	T	T	T	T	T	T	T	K	G	T	T	G	T	T	T	T	T	T	G	G	T	T
Bn-A03-p11655749	T/C/-	A03	10791243	+	NA	NA	NA	NA	NA	NA	T	T	T	T	T	T	T	T	T	T	C	T	C	T	T	T	T	C	T	T	T	T	T	T	-	C	T	T	C	T	T	T	T	T	T	C	C	T	T
Bn-A03-p11683045	T/C/-	A03	10809866	+	NA	NA	NA	NA	NA	NA	C	C	T	-	T	C	C	Y	Y	T	T	T	C	C	T	T	C	T	T	T	T	T	T	T	-	T	C	C	T	C	C	C	T	T	T	T	T	T	T
Bn-A03-p11687251	A/G/-	A03	10814054	+	NA	NA	NA	NA	NA	NA	G	G	G	G	G	G	G	G	G	G	G	G	A	G	G	G	G	G	G	G	G	G	G	G	G	G	G	G	G	G	G	G	G	G	G	G	G	G	G
Bn-A03-p11704125	A/G/-	A03	10833039	+	NA	NA	NA	NA	NA	NA	G	G	G	-	G	G	G	G	G	G	G	G	A	G	G	G	G	A	G	G	G	G	G	G	G	G	G	G	G	G	G	G	G	G	G	G	G	G	G
Bn-A03-p11739768	T/C/-	A03	10873333	+	NA	NA	NA	NA	NA	NA	C	C	C	C	T	C	C	C	C	Y	T	C	C	C	Y	C	C	T	T	C	C	C	T	C	Y	T	C	C	T	C	T	C	T	T	T	T	T	T	T
Bn-A03-p11751694	T/C/-	A03	10887036	+	NA	NA	NA	NA	NA	NA	T	T	T	T	T	T	T	T	Y	T	T	T	T	T	T	T	T	T	T	T	T	T	T	T	T	T	T	Y	T	T	T	T	T	T	T	T	T	T	T
Bn-A03-p11785159	A/C/-	A03	10925697	+	NA	NA	NA	NA	NA	NA	C	C	C	C	C	C	C	C	C	C	C	C	C	C	C	C	C	A	C	C	C	C	C	C	C	C	C	C	C	C	C	C	C	C	C	C	C	C	C
Bn-A03-p11798309	T/C/-	A03	10937286	+	NA	NA	NA	NA	NA	NA	T	T	T	-	T	T	T	T	Y	T	C	T	T	T	T	T	T	T	T	T	T	T	T	T	C	C	T	C	C	T	T	T	T	T	T	C	C	T	T
Bn-A07-p16595704	A/G/-	A03	11102000	+	NA	NA	NA	NA	NA	NA	G	G	G	G	G	G	G	G	G	G	G	G	G	G	G	G	G	G	G	G	G	G	G	G	G	G	G	G	G	G	G	-	G	G	G	G	G	G	G
Bn-scaff_16378_1-p20179	A/G/-	A03	11139585	+	NA	NA	NA	NA	NA	NA	A	A	A	A	A	A	A	A	A	A	A	A	A	A	A	A	A	A	A	A	A	A	A	A	A	A	A	A	A	A	A	A	A	A	A	A	A	A	A
Bn-A03-p12322277	A/G/-	A03	11386559	+	NA	NA	NA	NA	NA	NA	G	G	G	G	G	G	G	G	G	A	G	G	A	G	G	G	G	G	G	G	G	G	G	G	G	G	G	G	G	G	G	G	G	G	G	G	G	G	G
Bn-A03-p12359936	T/C/-	A03	11441864	+	NA	NA	NA	NA	NA	NA	C	C	C	C	C	C	C	C	C	T	C	C	C	C	C	C	C	C	C	C	C	C	C	C	C	C	C	C	C	C	T	C	C	C	C	C	C	C	C
Bn-A03-p12402349	A/G/-	A03	11486592	+	NA	NA	NA	NA	NA	NA	A	A	-	A	-	A	G	A	G	A	G	G	G	G	G	G	G	A	G	G	G	G	A	G	R	G	G	A	G	G	G	G	G	G	G	A	A	G	A
Bn-A03-p12511746	A/G/-	A03	11630658	+	NA	NA	NA	NA	NA	NA	A	A	A	A	A	A	A	A	A	G	A	A	A	A	A	A	A	G	A	A	A	A	A	A	A	A	A	A	A	A	A	A	A	A	A	A	A	A	A
Bn-A03-p12512134	T/C/-	A03	11631046	+	NA	NA	NA	NA	NA	NA	T	T	T	T	T	T	T	T	T	C	T	T	T	T	T	T	T	C	T	T	T	T	T	T	T	T	T	T	T	T	T	T	T	T	T	T	T	T	T
Bn-A03-p12518314	T/C/-	A03	11636637	+	NA	NA	NA	NA	NA	NA	T	T	T	T	T	T	T	T	T	Y	T	T	T	T	T	T	T	Y	T	T	T	T	T	T	T	T	T	T	T	T	T	T	T	T	T	T	T	T	T
Bn-A03-p12532686	A/G/-	A03	11650968	+	NA	NA	NA	NA	NA	NA	A	A	A	A	-	A	A	A	A	G	A	A	A	A	A	A	A	G	A	A	A	A	-	A	A	A	R	R	A	A	A	A	A	A	A	A	A	A	G
Bn-A03-p12541207	A/G/-	A03	11660943	+	NA	NA	NA	NA	NA	NA	A	A	A	A	A	A	A	A	A	G	A	A	A	A	A	A	A	G	A	G	A	A	A	A	A	A	A	A	A	A	A	A	A	A	A	A	A	A	A
Bn-A03-p12541337	T/C/-	A03	11661073	+	NA	NA	NA	NA	NA	NA	T	T	T	T	T	T	T	T	T	C	T	T	T	T	T	T	T	C	T	C	T	T	T	T	T	T	T	T	T	T	T	T	T	T	T	T	T	T	T
Bn-A03-p12622050	T/C/-	A03	11752266	+	NA	NA	NA	NA	NA	NA	T	T	T	T	T	T	T	T	T	T	T	T	C	T	T	T	T	T	T	T	T	T	T	T	T	T	T	T	T	T	T	T	T	T	T	T	T	T	T
Bn-A03-p12623286	T/C/-	A03	11753482	+	NA	NA	NA	NA	NA	NA	T	T	T	T	T	T	T	T	T	T	T	T	C	T	T	T	T	T	T	T	T	T	T	T	T	T	T	T	T	T	T	T	T	T	T	T	T	T	T
Bn-A03-p12639200	T/C/-	A03	11774456	+	NA	NA	NA	NA	NA	NA	T	T	T	T	T	C	T	T	Y	T	T	T	C	T	T	T	T	C	T	T	T	T	T	T	T	T	T	C	T	T	T	T	T	T	T	T	T	T	T
Bn-A03-p12639319	A/G/-	A03	11774575	+	NA	NA	NA	NA	NA	NA	G	G	G	G	G	A	G	G	R	G	G	G	A	G	G	G	G	A	G	G	G	G	G	G	G	G	G	A	G	G	G	G	G	G	G	G	G	G	G
Bn-scaff_20646_1-p675326	A/G/-	A03	11896443	+	NA	NA	NA	NA	NA	NA	G	G	G	G	G	G	G	G	G	A	G	G	G	G	G	G	G	A	G	G	G	G	G	G	G	G	G	R	G	G	G	G	G	G	G	G	G	G	G
Bn-A03-p12783093	A/G/-	A03	11921855	+	NA	NA	NA	NA	NA	NA	G	G	A	A	G	G	G	G	G	A	G	G	A	G	G	G	G	G	G	A	G	G	G	G	G	G	G	G	G	G	G	G	G	G	G	G	G	G	G
Bn-A03-p12784925	T/G/-	A03	11923689	+	NA	NA	NA	NA	NA	NA	T	T	G	G	T	T	T	T	T	G	T	T	G	T	T	T	T	T	T	G	T	T	T	T	T	T	T	T	T	T	T	T	T	T	T	T	T	T	T
Bn-A03-p12820905	T/C/-	A03	11960607	+	NA	NA	NA	NA	NA	NA	C	C	C	C	C	C	C	C	C	T	C	C	C	C	C	C	C	T	C	T	C	C	C	C	C	C	C	C	C	C	C	C	C	C	C	C	C	C	C
Bn-A03-p12826949	A/C/-	A03	11964447	+	NA	NA	NA	NA	NA	NA	C	C	C	C	C	C	C	C	C	A	C	C	C	C	C	C	C	A	C	A	C	C	C	C	C	C	C	C	C	C	C	C	C	C	C	C	C	C	C
Bn-A03-p12859516	T/C/-	A03	11999994	+	NA	NA	NA	NA	NA	NA	C	C	C	C	C	C	C	C	C	T	C	C	C	C	C	C	C	C	C	T	C	C	C	C	C	C	C	C	C	C	C	C	C	C	C	C	C	C	C
Bn-A03-p12863642	A/C/-	A03	12003592	+	NA	NA	NA	NA	NA	NA	A	A	C	C	A	A	A	A	A	C	A	A	C	A	A	A	A	A	A	C	A	A	A	A	A	A	A	A	A	A	C	A	A	A	A	A	A	C	A
Bn-A03-p12863684	T/C/-	A03	12003634	+	NA	NA	NA	NA	NA	NA	C	C	T	T	C	C	C	C	C	T	C	C	T	C	C	C	C	C	C	T	C	C	C	C	C	C	C	C	C	C	T	C	C	C	C	C	C	T	C
Bn-A03-p12903591	A/G/-	A03	12032631	+	NA	NA	NA	NA	NA	NA	G	G	A	A	G	G	G	G	G	A	G	G	A	G	G	G	G	G	G	A	G	G	G	G	G	G	G	G	G	G	A	G	G	G	G	G	G	A	G
Bn-A03-p12932399	T/C/-	A03	12063555	+	NA	NA	NA	NA	NA	NA	C	C	T	T	C	T	C	C	Y	T	C	C	T	C	C	C	C	T	C	T	C	C	C	C	C	C	C	T	C	C	T	C	C	C	C	C	C	T	C
Bn-A03-p12933099	T/G/-	A03	12064253	+	NA	NA	NA	NA	NA	NA	G	G	T	T	G	T	G	G	K	T	G	G	T	G	G	G	G	T	G	T	G	G	G	G	G	G	G	T	G	G	T	G	G	G	G	G	G	T	G
Bn-scaff_20646_1-p218671	A/G/-	A03	12064439	+	NA	NA	NA	NA	NA	NA	G	G	G	G	G	G	G	G	G	A	G	G	G	G	G	G	G	A	G	G	G	G	G	G	G	G	G	G	G	G	G	G	G	G	G	G	G	G	G
Bn-A03-p12941404	A/C/-	A03	12071687	+	NA	NA	NA	NA	NA	NA	A	A	A	C	A	A	A	A	A	C	A	A	A	A	A	A	A	A	A	C	A	A	A	A	A	A	A	A	A	A	C	A	A	A	A	A	A	C	A
Bn-A03-p12973462	T/G/-	A03	12105737	+	NA	NA	NA	NA	NA	NA	G	G	G	G	G	T	G	G	K	G	G	G	G	G	G	G	G	T	G	G	G	G	G	G	G	G	G	T	G	G	G	G	G	G	G	G	G	G	G
Bn-A03-p12981348	T/G/-	A03	12113814	+	NA	NA	NA	NA	NA	NA	G	G	G	T	G	G	G	G	G	T	G	G	G	G	G	G	G	G	G	T	G	G	G	G	G	G	G	G	G	G	T	G	G	G	G	G	G	T	G
Bn-A03-p12993600	A/G/-	A03	12126343	+	NA	NA	NA	NA	NA	NA	A	A	A	G	A	G	A	A	R	G	A	A	A	A	A	A	A	A	A	G	A	A	A	A	A	A	A	G	A	A	G	A	A	A	A	A	A	G	A
Bn-A03-p13017512	T/C/-	A03	12148126	+	NA	NA	NA	NA	NA	NA	T	T	T	C	T	C	T	T	Y	C	T	T	T	T	T	T	T	T	T	C	T	T	-	T	T	T	T	C	T	T	C	T	T	T	T	T	T	C	T
Bn-A03-p13017704	T/G/-	A03	12148318	+	NA	NA	NA	NA	NA	NA	G	G	G	T	G	T	G	G	K	T	G	G	G	G	G	G	G	G	G	T	G	G	G	G	G	G	G	T	G	G	T	G	G	G	G	G	G	T	G
Bn-A03-p13032037	A/G/-	A03	12160004	+	NA	NA	NA	NA	NA	NA	A	A	A	G	A	G	A	A	R	G	A	A	A	A	A	A	A	G	A	G	A	A	A	A	A	A	A	G	A	A	G	A	A	A	A	A	A	G	A
Bn-A03-p13032092	T/G/-	A03	12160059	+	NA	NA	NA	NA	NA	NA	T	T	T	G	T	G	T	T	K	G	T	T	T	T	T	T	T	G	T	G	T	T	T	T	T	T	T	G	T	T	G	T	T	T	T	T	T	G	T
Bn-A03-p13039000	A/G/-	A03	12166966	+	NA	NA	NA	NA	NA	NA	G	G	G	A	G	A	G	G	R	A	G	G	G	G	G	G	G	A	G	A	G	G	G	G	G	G	G	A	G	G	A	G	G	G	G	G	G	A	G
Bn-A03-p13039285	T/C/-	A03	12167251	+	NA	NA	NA	NA	NA	NA	T	T	C	C	T	C	T	T	Y	C	T	T	C	T	T	T	T	C	T	C	T	T	T	T	T	T	T	C	T	T	C	T	T	T	T	T	T	C	T
Bn-A03-p13043164	T/C/-	A03	12169605	+	NA	NA	NA	NA	NA	NA	C	C	C	T	C	T	C	C	Y	T	C	C	C	C	C	C	C	T	C	T	C	C	C	C	C	C	C	T	C	C	T	C	C	C	C	C	C	T	C
Bn-scaff_20646_1-p60086	T/G/-	A03	12175478	+	NA	NA	NA	NA	NA	NA	G	G	T	G	G	G	G	G	G	G	G	G	T	G	G	G	G	G	G	G	G	G	G	G	G	G	G	G	G	G	G	G	G	G	G	G	G	G	G
Bn-A03-p13058729	A/G/-	A03	12185351	+	NA	NA	NA	NA	NA	NA	A	A	A	G	A	G	A	A	R	G	A	A	A	A	A	A	A	G	A	G	A	A	A	A	A	A	A	G	A	A	G	A	A	A	A	A	A	G	A
Bn-A03-p13061709	A/G/-	A03	12188326	+	NA	NA	NA	NA	NA	NA	G	G	G	A	G	G	G	G	G	A	G	G	G	G	G	G	G	G	G	A	G	G	G	G	G	G	G	G	G	G	A	G	G	G	G	G	G	A	G
Bn-A03-p13099476	A/G/-	A03	12228208	+	NA	NA	NA	NA	NA	NA	A	A	G	G	A	G	A	A	R	G	G	A	G	A	A	A	A	G	G	G	A	A	A	A	G	G	G	G	G	A	A	G	G	G	G	G	G	G	A
Bn-A03-p13104283	T/C/-	A03	12232416	+	NA	NA	NA	NA	NA	NA	C	C	T	T	C	C	C	C	C	T	T	C	T	C	C	C	C	C	T	T	C	C	C	C	T	T	T	C	T	C	C	T	C	T	T	T	T	T	C
Bn-A03-p13131453	A/G/-	A03	12251462	+	NA	NA	NA	NA	NA	NA	G	G	G	G	G	A	G	G	R	G	G	G	G	G	G	G	G	A	G	G	G	G	G	G	G	G	G	A	G	G	G	G	G	G	G	G	G	G	G
Bn-scaff_27677_1-p246414	A/G/-	A03	12283241	+	NA	NA	NA	NA	NA	NA	G	G	G	G	G	G	G	G	G	G	G	G	G	G	G	G	G	A	G	G	G	G	G	G	G	G	G	G	G	G	G	G	G	G	G	G	G	G	G
Bn-A03-p13145923	A/C/-	A03	12283419	+	NA	NA	NA	NA	NA	NA	C	C	C	C	C	C	C	C	C	C	C	C	C	C	C	C	C	C	C	C	C	C	C	C	C	C	C	C	C	C	C	C	C	C	C	C	C	C	C
Bn-A03-p13160528	A/C/-	A03	12296424	+	NA	NA	NA	NA	NA	NA	C	C	A	A	C	A	C	C	M	A	A	C	A	C	M	C	C	A	A	A	C	A	C	A	A	A	A	A	A	C	C	A	C	A	C	A	A	C	C
Bn-A03-p13169138	A/G/-	A03	12311209	+	NA	NA	NA	NA	NA	NA	A	A	G	G	A	A	A	A	A	G	G	A	G	A	R	A	A	A	G	G	A	G	A	G	G	G	G	A	G	A	A	G	A	G	A	G	G	A	A
Bn-A03-p13189171	T/C/-	A03	12371518	+	NA	NA	NA	NA	NA	NA	T	T	C	C	T	C	T	T	Y	C	C	T	C	T	Y	T	T	T	C	C	T	C	T	C	C	C	C	C	C	T	T	C	T	C	T	C	C	T	T
Bn-A03-p13236840	T/C/-	A03	12404979	+	NA	NA	NA	NA	NA	NA	C	C	T	T	C	C	C	C	C	T	T	C	T	C	Y	C	C	C	T	T	C	T	C	T	T	T	T	C	T	C	C	T	C	T	C	T	T	C	C
Bn-scaff_27677_1-p105296	T/C/-	A03	12405633	+	NA	NA	NA	NA	NA	NA	T	T	C	C	-	T	T	T	T	C	C	T	C	T	Y	T	T	T	C	C	T	C	T	C	C	C	Y	T	C	T	T	C	T	C	T	C	C	T	T
Bn-scaff_27677_1-p90409	A/G/-	A03	12411543	+	NA	NA	NA	NA	NA	NA	G	G	A	A	G	G	G	G	G	A	A	G	A	G	-	G	G	G	A	A	G	A	G	A	A	A	A	G	A	G	G	A	G	A	G	A	A	G	G
Bn-A03-p13254564	T/C/-	A03	12420557	+	NA	NA	NA	NA	NA	NA	C	C	T	T	C	C	C	C	C	T	T	C	T	C	Y	C	C	C	T	T	C	T	C	T	T	T	T	C	T	C	C	T	C	T	C	T	T	C	C
Bn-A03-p13266036	T/C/-	A03	12427916	+	NA	NA	NA	NA	NA	NA	C	C	T	T	C	C	C	C	C	T	T	C	T	C	Y	C	C	C	T	T	C	T	C	T	T	T	T	C	T	C	C	T	C	T	C	T	T	C	C
Bn-A03-p13286574	A/G/-	A03	12444405	+	NA	NA	NA	NA	NA	NA	G	G	A	A	G	G	G	G	G	A	A	G	A	G	R	G	G	A	A	A	G	A	G	A	A	A	A	G	A	G	G	A	G	A	G	A	A	G	G
Bn-A03-p13287670	T/C/-	A03	12445503	+	NA	NA	NA	NA	NA	NA	T	T	C	C	T	T	T	T	T	C	C	T	C	T	Y	T	T	C	C	C	T	C	T	C	C	C	C	T	C	T	T	C	T	C	T	C	C	T	T
Bn-A03-p13288429	A/C/-	A03	12446261	+	NA	NA	NA	NA	NA	NA	A	A	C	A	A	A	A	A	A	A	A	A	C	A	A	A	A	A	A	C	A	A	A	A	A	A	A	A	A	A	A	A	A	A	A	A	A	A	A
Bn-A03-p13298734	A/G/-	A03	12454026	+	NA	NA	NA	NA	NA	NA	G	G	G	A	G	G	G	G	G	A	A	G	G	G	-	G	R	G	A	G	G	A	G	A	A	A	A	G	A	G	G	-	G	A	G	A	A	G	G
Bn-A03-p13421039	A/G/-	A03	12540906	+	NA	NA	NA	NA	NA	NA	A	A	A	A	A	A	A	A	A	A	G	A	A	A	R	A	R	G	G	-	A	G	A	G	G	G	G	A	G	A	A	G	A	G	A	G	G	A	A
Bn-A03-p13440035	A/C/-	A03	12558881	+	NA	NA	NA	NA	NA	NA	A	A	C	C	A	A	A	A	A	C	C	A	C	A	-	A	-	A	C	A	A	C	A	C	C	C	C	A	C	A	A	C	A	C	A	C	C	A	A
Bn-A03-p13451851	T/G/-	A03	12570027	+	NA	NA	NA	NA	NA	NA	T	T	G	G	T	T	T	T	T	T	G	T	G	T	K	T	K	T	G	G	T	G	T	G	G	G	G	T	G	T	T	G	T	G	T	G	G	T	T
Bn-A03-p13465062	T/C/-	A03	12584099	+	NA	NA	NA	NA	NA	NA	T	T	C	C	T	T	T	T	T	T	T	T	C	T	T	T	T	T	T	T	T	T	T	T	T	T	T	T	T	T	T	T	T	T	T	T	T	T	T
Bn-A03-p13502336	T/C/-	A03	12642630	+	NA	NA	NA	NA	NA	NA	T	T	C	C	T	T	T	T	T	C	C	T	C	T	Y	T	Y	T	C	T	T	T	T	T	C	C	-	T	C	T	T	C	T	C	T	C	C	T	T
Bn-A03-p13502830	T/C/-	A03	12643131	+	NA	NA	NA	NA	NA	NA	C	C	T	T	C	C	C	C	C	T	T	C	T	C	Y	C	Y	C	T	C	C	C	C	C	T	T	T	C	T	C	C	T	C	T	C	T	T	C	C
Bn-A03-p13523343	T/C/-	A03	12664782	+	NA	NA	NA	NA	NA	NA	C	C	T	T	C	C	C	C	C	C	T	C	T	C	-	C	C	C	T	C	C	C	C	C	T	T	Y	C	T	C	C	T	C	T	C	T	T	C	C
Bn-A03-p13545223	A/C/-	A03	12691986	+	NA	NA	NA	NA	NA	NA	C	C	C	A	C	C	C	C	C	A	C	C	C	C	C	C	M	A	C	A	C	M	C	C	C	C	C	C	C	C	C	C	C	C	C	C	C	C	C
Bn-A03-p13572495	T/C/-	A03	12727748	+	NA	NA	NA	NA	NA	NA	T	T	C	C	T	T	T	T	T	C	C	T	C	T	Y	T	Y	T	C	C	T	T	T	T	C	C	C	T	C	T	T	C	T	C	T	C	C	C	T
Bn-scaff_28509_1-p22130	A/C/-	A03	12776681	+	NA	NA	NA	NA	NA	NA	A	A	C	A	A	A	A	A	A	C	A	A	M	A	M	A	M	A	A	-	A	A	A	A	A	A	A	A	A	A	A	A	A	A	A	A	A	M	A
Bn-A03-p13640859	A/G/-	A03	12790150	+	NA	NA	NA	NA	NA	NA	A	A	G	A	A	A	A	A	A	G	A	A	G	A	G	A	R	A	A	A	A	A	A	A	A	A	A	A	A	A	A	A	A	A	A	A	A	G	A
Bn-A03-p13664500	A/G/-	A03	12809539	+	NA	NA	NA	NA	NA	NA	A	A	G	G	A	A	A	A	A	A	A	A	G	A	G	A	R	A	A	G	A	A	A	A	A	A	A	A	A	A	A	A	A	A	A	A	A	G	A
Bn-A03-p13664657	T/G/-	A03	12809700	+	NA	NA	NA	NA	NA	NA	T	T	G	G	T	T	T	T	T	G	T	T	G	T	G	T	K	G	T	G	T	T	T	T	T	T	T	T	T	T	T	T	T	T	T	T	T	G	T
Bn-scaff_19523_1-p427343	T/C/-	A03	12851068	+	NA	NA	NA	NA	NA	NA	T	T	T	T	T	T	T	T	T	T	T	T	T	T	T	T	T	T	T	C	T	T	T	T	T	T	T	T	T	T	T	T	T	T	T	T	C	T	T
Bn-scaff_19523_1-p428124	T/C/-	A03	12851839	+	NA	NA	NA	NA	NA	NA	C	C	T	T	C	C	C	C	C	T	C	C	T	C	T	C	-	T	C	C	C	C	C	C	C	C	C	C	C	C	C	C	C	C	C	C	C	T	C
Bn-A03-p13746713	T/C/-	A03	12863966	+	NA	NA	NA	NA	NA	NA	T	T	C	C	T	T	C	T	T	C	T	T	C	T	C	T	Y	C	T	C	T	T	T	T	T	T	T	T	T	T	T	T	T	T	T	T	C	C	T
Bn-A03-p13747074	A/G/-	A03	12864327	+	NA	NA	NA	NA	NA	NA	G	G	A	A	G	G	A	G	G	A	G	G	A	G	A	G	-	A	G	A	G	G	G	G	G	G	G	G	G	G	G	G	G	G	G	G	A	A	G
Bn-A07-p6068523	A/G/-	A03	12870687	+	NA	NA	NA	NA	NA	NA	A	A	A	A	A	A	A	A	A	A	A	A	A	A	R	A	A	G	A	G	A	A	A	A	A	A	A	A	A	A	A	A	A	A	A	A	G	A	A
Bn-A07-p6055505	T/C/-	A03	12874566	+	NA	NA	NA	NA	NA	NA	T	T	C	C	T	T	C	T	T	C	T	T	C	T	C	T	Y	C	T	C	T	T	T	T	T	T	T	T	T	T	T	T	T	T	T	T	C	C	T
Bn-A07-p6044939	T/C/-	A03	12885436	+	NA	NA	NA	NA	NA	NA	T	T	C	C	T	T	C	T	T	C	T	T	C	T	C	T	Y	C	T	T	T	T	T	T	T	T	T	T	T	T	T	T	T	T	T	T	T	C	T
Bn-A03-p13755726	A/G/-	A03	12890871	+	NA	NA	NA	NA	NA	NA	A	A	G	G	A	A	G	A	A	A	A	A	G	A	R	A	R	A	A	A	A	A	A	A	A	A	A	A	A	A	A	A	A	A	A	A	A	G	A
Bn-A03-p13758392	A/G/-	A03	12893544	+	NA	NA	NA	NA	NA	NA	A	A	G	G	A	A	G	A	A	A	A	A	G	A	R	A	R	A	A	A	A	A	A	A	A	A	A	A	A	A	A	A	A	A	A	A	A	G	A
Bn-A03-p13773583	T/G/-	A03	12904203	+	NA	NA	NA	NA	NA	NA	T	T	T	T	T	T	G	T	T	T	T	T	T	T	G	T	K	G	T	T	T	T	T	T	T	T	T	T	T	T	T	T	T	T	T	T	T	G	T
Bn-A03-p13777203	T/C/-	A03	12907798	+	NA	NA	NA	NA	NA	NA	T	T	C	C	T	T	T	T	T	T	T	T	C	T	Y	T	T	C	T	T	T	T	T	T	T	T	T	T	T	T	T	T	T	T	T	T	T	T	T
Bn-A03-p13778786	T/G/-	A03	12909373	+	NA	NA	NA	NA	NA	NA	T	T	G	G	T	T	T	T	T	T	T	T	G	T	K	T	T	G	T	T	T	T	T	T	T	T	T	T	T	T	T	T	T	T	T	T	T	T	T
Bn-A03-p13783263	T/C/-	A03	12913724	+	NA	NA	NA	NA	NA	NA	C	C	T	T	C	T	T	C	Y	C	C	C	T	C	T	C	Y	T	C	C	C	C	C	C	C	C	C	T	C	C	C	C	C	C	C	C	T	T	C
Bn-A03-p13802162	T/C/-	A03	12919118	+	NA	NA	NA	NA	NA	NA	T	T	T	T	T	C	T	T	Y	T	T	T	T	T	T	T	T	C	T	T	T	T	T	T	T	T	T	C	T	T	T	T	T	T	T	T	T	T	T
Bn-A03-p13853558	A/C/-	A03	12954683	+	NA	NA	NA	NA	NA	NA	C	C	C	C	A	A	C	M	A	C	A	C	C	C	M	A	-	A	A	C	A	A	A	A	A	A	-	-	A	C	A	A	A	A	A	A	A	A	A
Bn-A03-p13859927	T/C/-	A03	12963667	+	NA	NA	NA	NA	NA	NA	C	C	C	C	T	C	C	Y	Y	C	T	C	C	C	Y	T	C	C	T	C	T	T	T	T	T	T	Y	-	T	C	T	T	T	T	T	T	C	T	T
Bn-A03-p13883754	T/G/-	A03	12992647	+	NA	NA	NA	NA	NA	NA	G	G	G	G	G	G	G	G	G	G	G	G	G	G	G	G	G	-	G	G	G	G	G	G	G	G	G	-	G	G	G	G	G	G	G	G	G	G	G
Bn-A03-p13908787	T/G/-	A03	13015172	+	NA	NA	NA	NA	NA	NA	G	G	T	T	T	T	G	K	T	T	T	G	T	-	K	T	K	-	T	G	T	T	T	T	T	T	T	T	T	G	T	T	T	T	T	T	G	T	T
Bn-A03-p13906492	A/G/-	A03	13026717	+	NA	NA	NA	NA	NA	NA	G	G	A	A	A	A	G	R	A	A	A	G	A	G	R	A	-	G	A	G	A	A	A	A	A	A	-	A	A	G	A	A	A	A	A	A	G	A	A
Bn-A03-p13922223	A/G/-	A03	13047816	+	NA	NA	NA	NA	NA	NA	A	A	G	G	R	G	A	A	R	G	G	A	G	A	R	A	R	A	G	A	A	G	G	G	G	G	-	G	G	A	G	G	G	G	G	G	A	G	A
Bn-A03-p13922405	T/C/-	A03	13047998	+	NA	NA	NA	NA	NA	NA	C	C	T	T	Y	T	C	C	Y	T	T	C	C	C	Y	C	Y	C	T	C	C	T	T	T	T	T	T	T	T	C	T	T	T	T	T	T	C	T	C
Bn-A03-p13925731	A/G/-	A03	13055174	+	NA	NA	NA	NA	NA	NA	G	G	A	A	R	A	G	G	R	A	A	G	G	G	R	G	R	G	A	G	G	A	A	A	A	A	-	A	A	G	A	A	A	A	A	A	G	A	G
Bn-A03-p13943992	A/G/-	A03	13075087	+	NA	NA	NA	NA	NA	NA	G	G	A	A	G	A	G	G	R	A	A	G	G	G	R	G	R	G	A	G	G	A	A	A	A	A	R	A	A	G	A	A	A	A	A	A	G	A	G
Bn-A03-p13970114	T/C/-	A03	13106624	+	NA	NA	NA	NA	NA	NA	C	C	T	T	Y	T	C	C	Y	T	T	C	C	C	Y	C	Y	C	T	C	C	T	T	T	T	T	T	T	T	C	T	T	T	T	T	T	C	T	C
Bn-A03-p13974725	A/G/-	A03	13116790	+	NA	NA	NA	NA	NA	NA	G	G	A	A	R	A	G	G	R	A	A	G	G	G	R	G	R	A	A	G	G	A	A	A	A	A	A	A	A	G	A	A	A	A	A	A	G	A	G
Bn-A03-p13987679	T/G/-	A03	13121643	+	NA	NA	NA	NA	NA	NA	T	T	T	T	K	G	T	T	K	G	G	T	T	T	K	T	K	G	G	T	T	G	G	G	G	G	G	G	G	T	G	G	G	G	G	G	T	G	T
Bn-A03-p13996014	T/C/-	A03	13139772	+	NA	NA	NA	NA	NA	NA	C	C	T	T	Y	T	C	C	Y	T	T	C	C	C	Y	C	Y	T	T	C	C	T	T	T	T	T	-	T	T	C	T	T	T	T	T	T	C	T	C
Bn-A03-p14009871	A/G/-	A03	13157670	+	NA	NA	NA	NA	NA	NA	G	G	G	G	G	G	G	G	G	G	G	G	G	G	G	G	G	G	G	G	G	G	G	G	G	G	G	G	G	G	G	G	G	G	G	G	G	G	G
Bn-A03-p14015779	A/C/-	A03	13161092	+	NA	NA	NA	NA	NA	NA	C	C	C	C	A	C	C	C	M	A	C	C	C	C	C	A	C	C	C	C	A	C	C	C	C	C	C	A	C	C	C	C	C	C	C	C	A	C	A
Bn-A03-p14023392	T/G/-	A03	13168253	+	NA	NA	NA	NA	NA	NA	G	G	G	G	K	G	G	G	K	G	G	G	G	G	G	T	G	T	G	G	T	G	G	G	G	G	G	T	G	G	G	G	G	G	G	G	G	G	T
Bn-A03-p14026999	A/G/-	A03	13171802	+	NA	NA	NA	NA	NA	NA	A	A	A	A	-	G	A	G	G	G	A	G	A	A	G	G	G	G	G	G	G	G	A	G	A	A	A	G	A	A	G	A	A	G	G	A	G	G	G
Bn-A03-p14031468	A/G/-	A03	13175871	+	NA	NA	NA	NA	NA	NA	G	G	G	G	G	G	G	G	G	G	G	G	G	G	G	G	G	G	G	G	G	G	G	G	G	G	G	G	G	G	G	G	G	G	G	G	A	G	G
Bn-A03-p14034228	T/G/-	A03	13180130	+	NA	NA	NA	NA	NA	NA	T	T	T	T	K	G	T	G	G	G	T	G	T	T	G	G	G	G	G	G	G	G	T	G	T	T	T	G	T	T	G	T	T	G	G	T	G	G	G
Bn-A03-p14037892	A/C/-	A03	13183870	+	NA	NA	NA	NA	NA	NA	C	C	A	A	M	A	C	A	A	A	A	A	A	C	A	A	A	C	A	A	A	A	C	A	A	A	-	A	A	C	A	A	A	A	A	A	A	A	A
Bn-A03-p14041931	A/C/-	A03	13187954	+	NA	NA	NA	NA	NA	NA	C	C	C	C	M	A	C	A	A	A	C	A	C	C	A	A	A	C	A	A	A	A	C	A	C	C	C	C	C	C	A	C	C	A	A	C	C	A	A
Bn-A03-p14092692	A/G/-	A03	13276830	+	NA	NA	NA	NA	NA	NA	G	G	A	A	G	G	G	G	G	G	A	G	A	G	G	G	G	G	G	G	G	G	G	G	A	A	R	G	A	G	G	A	A	G	G	A	A	G	G
Bn-A03-p14095948	T/C/-	A03	13280865	+	NA	NA	NA	NA	NA	NA	T	T	C	C	T	T	T	T	T	T	C	T	C	T	T	T	T	C	T	T	T	T	T	T	C	C	C	T	C	T	T	C	C	T	T	C	C	T	T
Bn-A03-p14112910	A/G/-	A03	13297288	+	NA	NA	NA	NA	NA	NA	A	A	G	G	R	A	G	G	A	G	G	G	G	A	R	A	R	A	A	A	A	A	G	A	G	G	G	G	G	A	A	G	G	A	A	G	A	A	A
Bn-A03-p14113489	A/C/-	A03	13297867	+	NA	NA	NA	NA	NA	NA	A	A	C	C	M	A	C	C	A	C	C	C	C	A	-	A	C	A	A	A	A	A	C	A	C	C	C	C	C	A	A	C	C	A	M	C	C	A	A
Bn-A03-p14121492	T/C/-	A03	13305961	+	NA	NA	NA	NA	NA	NA	C	C	T	T	T	C	T	T	Y	T	T	T	T	C	C	T	-	C	C	T	T	C	T	C	T	T	T	C	T	C	C	T	T	C	C	T	C	C	T
Bn-A03-p14127649	A/G/-	A03	13314548	+	NA	NA	NA	NA	NA	NA	G	G	G	G	G	A	G	G	R	A	G	G	G	G	A	G	R	A	R	G	G	A	G	A	G	G	G	A	G	G	A	G	G	A	A	G	A	A	G
Bn-scaff_18482_1-p677287	T/C/-	A03	13349313	+	NA	NA	NA	NA	NA	NA	C	C	C	C	C	T	C	T	C	C	C	C	T	C	C	C	T	T	-	C	C	T	C	T	C	C	C	C	C	C	T	C	C	T	T	C	T	T	C
Bn-A03-p14175904	A/G/-	A03	13373240	+	NA	NA	NA	NA	NA	NA	A	A	G	G	A	A	A	G	A	G	G	A	A	A	R	A	G	G	R	G	A	G	A	G	G	G	G	G	G	A	G	G	G	G	A	G	A	G	A
Bn-A03-p14196859	T/G/-	A03	13382003	+	NA	NA	NA	NA	NA	NA	G	G	T	T	T	G	T	G	K	T	T	T	G	G	K	T	K	G	T	T	T	T	T	T	T	T	-	T	T	G	T	T	T	T	T	T	T	T	T
Bn-A03-p14197151	T/C/-	A03	13382300	+	NA	NA	NA	NA	NA	NA	C	C	T	T	T	C	T	T	Y	T	T	T	C	C	C	T	T	T	T	T	T	T	T	T	T	T	Y	T	T	C	T	T	T	T	T	T	T	T	T
Bn-A03-p14261914	T/G/-	A03	13448735	+	NA	NA	NA	NA	NA	NA	T	T	T	T	T	T	T	T	T	T	T	T	T	T	T	T	T	T	T	T	T	T	T	T	T	T	T	T	T	T	T	T	T	T	T	T	T	T	T
Bn-A03-p14273821	A/C/-	A03	13456918	+	NA	NA	NA	NA	NA	NA	A	A	A	A	A	C	A	A	M	A	A	A	A	A	C	A	A	A	A	A	A	A	A	A	A	A	A	A	A	A	A	A	A	A	A	A	C	A	A
Bn-A03-p14276328	A/G/-	A03	13459403	+	NA	NA	NA	NA	NA	NA	A	A	A	A	A	A	A	A	A	A	A	A	A	A	G	A	A	A	A	A	A	A	A	A	A	A	A	A	A	A	A	A	A	A	A	A	A	A	A
Bn-A03-p14282460	A/G/-	A03	13465551	+	NA	NA	NA	NA	NA	NA	G	G	A	A	A	A	A	G	A	G	A	A	G	G	A	A	G	G	G	G	A	G	A	G	G	G	G	G	G	G	G	G	G	G	A	G	A	G	A
Bn-A03-p14286873	T/C/-	A03	13469904	+	NA	NA	NA	NA	NA	NA	C	C	C	C	C	C	C	C	C	C	C	C	C	C	T	C	C	T	C	C	C	C	C	C	C	C	C	C	C	C	C	C	C	C	C	C	T	C	C
Bn-A03-p14290741	T/G/-	A03	13473758	+	NA	NA	NA	NA	NA	NA	T	T	G	G	G	G	T	G	G	T	G	G	G	T	G	G	K	T	K	G	G	G	T	T	G	T	K	G	G	T	G	G	G	G	T	G	G	G	G
Bn-A03-p14291952	T/C/-	A03	13474966	+	NA	NA	NA	NA	NA	NA	-	-	T	T	C	C	T	C	C	C	T	C	C	C	Y	C	-	C	C	C	C	C	T	T	C	C	C	C	C	C	C	C	C	C	T	C	T	C	C
Bn-A03-p14295089	A/C/-	A03	13478102	+	NA	NA	NA	NA	NA	NA	C	C	A	A	C	C	C	C	C	A	A	C	C	C	M	C	C	A	C	C	C	C	C	C	C	C	C	C	C	C	C	C	C	C	C	C	C	C	C
Bn-A03-p14295396	A/G/-	A03	13478402	+	NA	NA	NA	NA	NA	NA	A	A	A	A	A	A	G	A	A	A	A	A	A	A	A	A	R	A	R	A	A	A	G	G	A	A	A	A	A	A	G	A	A	A	G	A	G	A	A
Bn-A03-p14306440	A/C/-	A03	13490848	+	NA	NA	NA	NA	NA	NA	A	A	C	C	A	A	A	A	A	C	C	A	A	A	A	A	A	C	M	A	A	A	A	A	A	A	A	A	A	A	A	A	A	A	A	A	C	A	A
Bn-A03-p14309803	T/C/-	A03	13494198	+	NA	NA	NA	NA	NA	NA	C	C	T	T	C	C	C	C	C	T	T	C	C	C	C	C	C	-	Y	C	C	C	C	C	C	C	C	C	C	C	C	C	C	C	C	C	T	C	C
Bn-A03-p14310386	A/C/-	A03	13494780	+	NA	NA	NA	NA	NA	NA	A	A	C	C	A	A	A	A	A	C	C	A	A	A	A	A	A	A	M	A	A	A	A	A	A	A	A	A	A	A	A	A	A	A	A	A	C	A	A
Bn-A03-p14330609	T/C/-	A03	13516748	+	NA	NA	NA	NA	NA	NA	C	C	C	C	T	T	T	T	T	C	C	T	T	C	Y	T	T	C	Y	T	T	C	C	C	T	C	-	T	T	C	C	T	C	T	T	T	T	T	T
Bn-A03-p14355646	T/C/-	A03	13533972	+	NA	NA	NA	NA	NA	NA	T	T	C	C	T	T	T	T	T	C	-	T	T	T	T	T	T	C	T	T	T	C	T	T	T	T	T	T	T	T	T	T	C	T	T	T	T	T	T
Bn-A03-p14387177	A/C/-	A03	13555624	+	NA	NA	NA	NA	NA	NA	A	A	A	A	A	C	C	C	M	A	A	A	A	A	M	A	C	A	M	C	A	C	A	A	C	A	C	C	C	A	A	M	C	C	C	C	C	C	A
Bn-A03-p14399972	A/G/-	A03	13571282	+	NA	NA	NA	NA	NA	NA	A	A	A	A	A	G	G	G	R	A	A	A	A	A	R	A	G	A	R	G	A	A	A	A	G	A	R	G	G	A	A	R	A	G	G	G	A	G	A
Bn-A03-p14413451	T/C/-	A03	13580378	+	NA	NA	NA	NA	NA	NA	T	T	C	C	T	T	T	T	T	T	C	T	T	T	T	T	T	C	T	T	T	C	T	T	T	-	T	T	T	T	-	T	C	T	T	T	C	T	T
Bn-A03-p14458139	A/G/-	A03	13629485	+	NA	NA	NA	NA	NA	NA	G	G	A	A	G	A	A	A	R	R	A	-	A	R	R	R	A	A	R	R	R	A	-	A	A	G	A	A	A	R	R	R	A	A	-	A	A	A	G
Bn-A03-p14461008	A/C/-	A03	13630879	+	NA	NA	NA	NA	NA	NA	C	C	A	A	C	A	A	A	M	C	A	C	A	C	M	C	A	A	M	C	C	A	C	A	A	C	M	A	A	C	C	M	A	A	C	A	A	A	C
Bn-A03-p14462570	A/C/-	A03	13632409	+	NA	NA	NA	NA	NA	NA	A	A	C	C	A	A	A	A	A	A	C	A	C	A	A	A	A	A	A	A	A	A	A	A	A	A	A	A	A	A	A	A	A	A	A	A	A	A	A
Bn-A03-p14473296	T/C/-	A03	13643109	+	NA	NA	NA	NA	NA	NA	C	C	C	C	C	C	C	C	C	C	C	C	C	C	C	C	C	C	C	C	C	T	C	C	C	C	C	C	C	C	C	C	T	C	C	C	C	T	C
Bn-A03-p14474478	T/C/-	A03	13644281	+	NA	NA	NA	NA	NA	NA	C	C	T	T	C	C	C	C	C	C	T	C	T	C	C	C	C	C	C	C	C	T	C	C	C	C	C	C	C	C	C	C	T	C	C	C	T	T	C
Bn-A03-p14511431	A/G/-	A03	13673373	+	NA	NA	NA	NA	NA	NA	A	A	A	A	A	A	A	A	A	G	A	A	A	A	A	A	A	A	A	A	A	A	A	A	A	A	A	A	A	A	A	A	A	A	A	A	G	A	A
Bn-A03-p14552086	A/G/-	A03	13723717	+	NA	NA	NA	NA	NA	NA	G	G	A	A	G	G	G	G	G	A	A	G	A	G	R	G	G	A	R	A	G	G	G	G	G	G	G	G	G	G	A	G	G	G	G	G	A	A	G
Bn-A03-p14557663	T/G/-	A03	13729386	+	NA	NA	NA	NA	NA	NA	G	G	G	G	G	G	G	G	G	G	G	G	G	G	G	G	G	T	K	G	G	G	G	G	G	G	G	G	G	G	T	G	G	G	G	G	G	G	G
Bn-A03-p14583041	T/G/-	A03	13754461	+	NA	NA	NA	NA	NA	NA	G	G	T	T	G	G	G	G	G	G	T	G	T	G	G	G	G	T	K	G	G	G	G	T	G	G	G	G	G	G	T	G	G	G	G	G	G	G	G
Bn-A03-p14585799	T/C/-	A03	13757231	+	NA	NA	NA	NA	NA	NA	T	T	C	C	T	T	T	T	T	C	C	T	C	T	T	T	T	C	T	T	T	T	T	T	T	T	T	T	T	T	T	T	T	T	T	T	T	T	T
Bn-A03-p14586392	A/C/-	A03	13757825	+	NA	NA	NA	NA	NA	NA	C	C	A	A	C	C	C	C	C	A	A	C	A	C	C	C	C	A	C	C	C	C	C	C	C	C	C	C	C	C	C	C	C	C	C	C	C	C	C
Bn-A03-p14598476	T/C/-	A03	13767314	+	NA	NA	NA	NA	NA	NA	T	T	C	C	T	T	T	T	T	C	C	T	C	T	T	T	T	C	T	T	T	T	T	T	T	T	T	T	T	T	T	T	T	T	T	T	T	T	T
Bn-A03-p14611641	T/G/-	A03	13781418	+	NA	NA	NA	NA	NA	NA	G	G	G	G	G	G	G	G	G	G	G	G	G	G	G	G	G	G	K	G	G	G	G	T	G	G	G	G	G	G	T	G	G	G	G	G	G	G	G
Bn-A03-p14735831	T/C/-	A03	13912968	+	NA	NA	NA	NA	NA	NA	T	T	T	T	C	T	T	T	Y	C	T	C	T	T	T	Y	Y	T	Y	T	C	T	T	C	C	T	C	T	C	T	T	Y	T	C	T	C	T	T	C
Bn-A03-p14736161	T/G/-	A03	13913299	+	NA	NA	NA	NA	NA	NA	G	G	G	G	T	G	G	G	-	T	G	T	G	G	G	K	K	G	K	G	T	G	G	T	T	G	-	G	T	G	G	-	G	T	G	T	G	G	T
Bn-A03-p14747263	A/G/-	A03	13916047	+	NA	NA	NA	NA	NA	NA	G	G	A	A	G	G	G	G	G	G	A	G	A	G	G	G	G	G	G	G	G	G	G	G	G	G	G	G	G	G	G	G	G	G	G	G	G	G	G
Bn-A03-p14758285	A/G/-	A03	13927475	+	NA	NA	NA	NA	NA	NA	A	A	A	A	G	A	A	A	G	G	A	G	A	A	A	R	R	A	-	A	G	A	A	G	G	A	G	A	G	A	A	R	A	G	A	G	A	A	G
Bn-A03-p14759764	A/G/-	A03	13929211	+	NA	NA	NA	NA	NA	NA	G	G	G	G	G	G	G	G	R	A	G	A	G	G	G	R	-	G	R	G	A	G	G	A	A	G	-	G	A	G	G	G	G	A	G	A	G	G	G
Bn-A03-p14784764	T/C/-	A03	13948546	+	NA	NA	NA	NA	NA	NA	C	C	T	T	Y	C	C	C	-	T	T	T	T	C	C	Y	Y	C	Y	C	T	C	C	T	T	C	Y	C	T	C	C	C	C	T	C	T	C	C	C
Bn-A03-p14839497	A/G/-	A03	13995704	+	NA	NA	NA	NA	NA	NA	G	G	G	G	R	G	A	G	G	G	G	G	G	G	G	G	G	A	G	G	G	G	A	G	G	G	G	G	G	G	G	R	G	G	G	G	A	G	A
Bn-A03-p14839583	A/C/-	A03	13995790	+	NA	NA	NA	NA	NA	NA	C	C	A	A	A	A	A	C	A	A	A	A	A	C	C	M	M	C	M	C	A	C	A	A	A	C	A	A	A	C	C	A	C	A	C	A	C	C	A
Bn-A03-p14848117	A/C/-	A03	14003178	+	NA	NA	NA	NA	NA	NA	A	A	A	A	A	A	A	A	A	A	A	A	A	A	A	A	A	A	A	A	A	A	A	A	A	A	A	A	A	A	A	A	A	A	A	A	A	A	A
Bn-A03-p14870270	A/G/-	A03	14024293	+	NA	NA	NA	NA	NA	NA	G	G	G	G	G	G	G	G	G	G	G	G	G	G	G	G	G	A	G	G	G	G	G	G	G	G	G	G	G	G	G	G	G	G	G	G	G	G	G
Bn-A03-p14885241	A/C/-	A03	14038821	+	NA	NA	NA	NA	NA	NA	A	A	C	C	C	A	A	A	M	C	C	C	C	A	A	M	M	C	M	A	C	A	C	C	C	A	C	A	C	A	A	C	A	C	A	C	C	A	C
Bn-A03-p14888403	A/G/-	A03	14043106	+	NA	NA	NA	NA	NA	NA	A	A	G	G	G	A	A	A	R	G	G	G	G	A	A	R	R	G	R	A	G	A	G	G	G	A	G	A	G	A	A	G	A	G	A	G	G	-	G
Bn-A03-p15002477	A/G/-	A03	14132364	+	NA	NA	NA	NA	NA	NA	A	A	A	A	A	A	A	A	A	A	A	A	A	A	A	A	A	A	A	A	A	A	A	A	A	A	A	A	A	A	A	A	A	A	A	A	A	G	A
Bn-A03-p15004059	T/C/-	A03	14133891	+	NA	NA	NA	NA	NA	NA	C	C	C	C	C	C	C	C	C	T	C	C	C	C	C	C	C	C	C	C	C	C	C	C	C	C	C	C	C	C	C	C	C	C	C	C	T	T	C
Bn-A03-p15015706	A/G/-	A03	14145284	+	NA	NA	NA	NA	NA	NA	A	A	G	A	-	A	A	A	A	A	G	A	A	A	A	A	A	G	R	A	A	A	G	A	G	A	G	A	G	A	A	-	A	G	A	G	G	A	G
Bn-A03-p15044158	A/G/-	A03	14164839	+	NA	NA	NA	NA	NA	NA	A	A	A	A	A	A	A	A	A	G	A	A	A	A	A	A	A	A	A	A	A	A	A	A	A	A	A	A	A	A	A	A	A	A	A	A	A	A	A
Bn-A03-p15077006	T/C/-	A03	14182303	+	NA	NA	NA	NA	NA	NA	C	C	C	T	Y	T	T	T	Y	T	C	C	T	C	T	C	T	T	T	T	C	T	T	T	T	C	Y	T	T	C	T	T	T	T	T	T	T	T	T
Bn-A03-p15120410	A/G/-	A03	14229116	+	NA	NA	NA	NA	NA	NA	G	G	G	G	-	G	A	A	G	-	G	G	A	G	R	G	R	A	R	A	G	A	A	G	G	G	G	G	G	G	A	G	A	G	A	G	-	-	A
Bn-A03-p15141821	A/G/-	A03	14250181	+	NA	NA	NA	NA	NA	NA	G	G	A	A	G	A	G	G	R	G	A	G	G	G	R	G	G	G	R	G	G	R	G	A	A	G	R	A	A	G	G	A	G	A	G	A	A	-	G
Bn-A03-p15149454	A/C/-	A03	14253189	+	NA	NA	NA	NA	NA	NA	C	C	C	A	M	A	A	A	C	C	C	C	A	C	A	C	A	A	A	A	C	A	A	A	A	C	-	A	A	C	A	A	A	A	A	A	A	A	A
Bn-A03-p15233860	T/C/-	A03	14291858	+	NA	NA	NA	NA	NA	NA	C	C	T	T	Y	T	C	C	T	T	T	T	C	C	Y	C	C	C	C	C	T	Y	C	T	C	C	C	T	C	C	C	Y	C	C	C	C	C	T	C
Bn-A03-p15237693	A/C/-	A03	14294154	+	NA	NA	NA	NA	NA	NA	A	A	A	A	M	A	A	A	M	C	A	C	A	A	M	A	A	A	A	A	C	M	A	C	A	A	A	A	A	A	A	A	A	A	A	A	A	C	A
Bn-A03-p15240794	T/C/-	A03	14297289	+	NA	NA	NA	NA	NA	NA	C	C	C	C	Y	C	C	C	Y	T	C	T	C	C	C	C	C	C	C	C	T	Y	C	T	C	C	C	C	C	C	C	C	C	C	C	C	T	T	C
Bn-A03-p15240992	A/G/-	A03	14297487	+	NA	NA	NA	NA	NA	NA	A	A	G	G	A	G	A	A	G	G	G	G	A	A	R	A	A	A	A	A	G	A	A	G	A	A	A	G	A	A	A	R	A	A	A	A	G	G	A
Bn-A03-p15265791	T/C/-	A03	14319683	+	NA	NA	NA	NA	NA	NA	-	Y	Y	T	Y	T	Y	T	T	T	Y	T	C	Y	Y	-	T	-	Y	C	T	Y	Y	T	Y	Y	Y	T	-	Y	Y	T	Y	Y	Y	Y	T	T	-
Bn-scaff_17521_1-p1167341	T/G/-	A03	14325181	+	NA	NA	NA	NA	NA	NA	T	T	G	T	T	T	T	T	T	T	G	T	T	T	T	T	T	T	T	T	T	T	T	T	T	T	T	T	T	T	T	T	T	T	T	T	T	T	T
Bn-scaff_17521_1-p1166900	A/G/-	A03	14325622	+	NA	NA	NA	NA	NA	NA	A	A	G	A	A	A	A	A	A	A	G	A	A	A	A	A	A	A	A	A	A	A	A	A	A	A	A	A	A	A	A	A	A	A	A	A	A	A	A
Bn-A03-p15300653	T/C/-	A03	14355865	+	NA	NA	NA	NA	NA	NA	T	T	T	T	T	T	T	C	T	C	T	T	T	T	Y	T	C	T	T	T	T	T	T	T	T	T	T	T	T	T	T	T	T	T	T	T	T	C	T
Bn-A03-p15326805	T/C/-	A03	14366473	+	NA	NA	NA	NA	NA	NA	C	C	T	T	T	T	C	T	T	T	T	T	T	C	T	C	T	C	C	C	T	Y	T	T	C	C	C	T	C	C	C	T	C	C	C	C	T	T	T
Bn-A03-p15346153	A/G/-	A03	14383303	+	NA	NA	NA	NA	NA	NA	G	G	A	A	A	A	G	G	A	G	A	A	A	G	G	G	G	G	G	G	A	-	A	A	G	G	G	A	G	G	G	-	G	G	G	G	G	G	A
Bn-A03-p15347967	T/C/-	A03	14385109	+	NA	NA	NA	NA	NA	NA	C	C	T	T	T	T	C	T	T	T	T	T	Y	C	Y	C	T	C	C	C	T	Y	T	T	C	C	C	T	C	C	C	T	C	C	C	C	T	T	T
Bn-A03-p15351982	A/C/-	A03	14389287	+	NA	NA	NA	NA	NA	NA	C	C	A	C	C	C	C	A	C	A	A	C	C	C	M	C	A	C	C	C	C	C	C	C	C	C	C	C	C	C	C	C	C	C	C	C	A	A	C
Bn-A03-p15359867	A/G/-	A03	14401493	+	NA	NA	NA	NA	NA	NA	A	A	A	G	G	G	A	A	G	A	A	G	G	A	A	A	A	A	A	A	G	R	G	G	A	A	A	G	A	A	A	G	A	A	A	A	G	A	G
Bn-A03-p15363919	A/G/-	A03	14405544	+	NA	NA	NA	NA	NA	NA	G	G	G	A	A	A	R	A	A	A	G	A	A	G	R	G	A	G	G	G	A	R	A	A	G	G	G	A	G	G	G	R	G	G	G	G	A	A	A
Bn-A03-p15397187	A/G/-	A03	14446605	+	NA	NA	NA	NA	NA	NA	A	A	G	A	A	A	A	G	A	G	G	A	A	A	A	A	G	A	R	A	A	A	A	A	A	A	A	A	A	A	G	A	A	A	A	A	G	G	A
Bn-A03-p15404736	A/G/-	A03	14454534	+	NA	NA	NA	NA	NA	NA	A	A	G	G	A	G	A	A	R	G	G	A	A	A	A	A	A	A	A	A	A	A	A	A	A	A	A	G	A	A	A	G	A	A	A	A	A	A	A
Bn-A03-p15405498	A/G/-	A03	14455341	+	NA	NA	NA	NA	NA	NA	A	A	G	G	A	G	A	A	R	G	G	A	A	A	A	A	A	A	A	A	A	A	A	A	A	A	A	G	A	A	A	G	A	A	A	A	A	A	A
Bn-A03-p15416728	T/G/-	A03	14467832	+	NA	NA	NA	NA	NA	NA	T	T	G	T	T	T	T	T	T	G	G	T	T	T	T	T	T	T	T	T	T	T	T	T	T	T	T	T	T	T	T	T	T	T	T	T	G	T	T
Bn-A03-p15435174	A/G/-	A03	14485629	+	NA	NA	NA	NA	NA	NA	A	A	G	A	A	A	A	A	A	G	G	A	A	A	A	A	A	A	A	A	A	A	A	A	A	A	A	A	A	A	A	A	A	A	A	A	A	A	A
Bn-A03-p15435442	A/C/-	A03	14485897	+	NA	NA	NA	NA	NA	NA	A	A	A	A	A	A	A	C	A	A	A	A	A	A	C	A	C	C	C	A	A	C	A	C	C	A	M	A	C	A	C	M	C	C	C	C	A	C	A
Bn-A03-p15481319	A/G/-	A03	14542163	+	NA	NA	NA	NA	NA	NA	A	A	G	A	A	A	A	G	A	G	G	A	A	A	A	A	G	A	A	A	A	A	A	A	G	A	R	A	G	A	G	-	A	G	A	G	G	A	A
Bn-A03-p15499288	T/C/-	A03	14560809	+	NA	NA	NA	NA	NA	NA	T	T	T	T	T	T	T	T	T	T	T	T	T	T	T	T	T	T	T	T	T	T	T	T	T	T	T	T	T	T	T	T	T	T	T	T	T	T	T
Bn-scaff_17521_1-p805361	A/C/-	A03	14571835	+	NA	NA	NA	NA	NA	NA	C	C	C	C	C	C	A	C	A	A	C	C	A	C	C	C	A	A	C	A	A	C	A	C	C	C	C	C	C	C	A	A	C	C	C	C	C	C	C
Bn-scaff_17521_1-p742161	T/C/-	A03	14622665	+	NA	NA	NA	NA	NA	NA	T	T	T	T	T	C	C	T	C	C	C	T	C	T	T	T	C	C	T	C	C	T	C	T	T	T	T	T	T	T	C	C	T	T	T	T	T	T	T
Bn-A03-p15577849	A/G/-	A03	14638235	+	NA	NA	NA	NA	NA	NA	A	A	G	A	G	G	G	G	R	G	G	A	G	A	R	A	G	G	G	G	A	G	G	G	G	A	G	G	G	A	G	G	G	G	A	G	G	G	G
Bn-A03-p15622267	T/C/-	A03	14683281	+	NA	NA	NA	NA	NA	NA	C	C	T	C	Y	C	T	C	C	C	T	C	T	C	C	C	C	C	C	C	C	C	T	C	C	C	C	C	C	C	C	C	C	C	C	C	C	C	T
Bn-A03-p15624030	A/G/-	A03	14692101	+	NA	NA	NA	NA	NA	NA	A	A	G	A	R	A	G	A	A	A	G	A	G	A	A	A	A	A	A	A	A	A	G	A	A	A	A	A	A	A	A	A	A	A	A	A	A	A	G
Bn-A03-p15704793	T/C/-	A03	14764958	+	NA	NA	NA	NA	NA	NA	T	T	T	T	T	T	T	T	T	T	C	T	T	T	T	T	T	T	T	T	T	T	T	T	T	T	T	T	T	T	T	T	T	T	T	T	T	T	T
Bn-A03-p15704830	A/G/-	A03	14764995	+	NA	NA	NA	NA	NA	NA	G	G	G	G	G	G	G	G	G	G	G	G	G	G	G	G	G	G	G	G	G	G	G	G	G	G	G	G	G	G	G	G	G	G	G	G	A	G	G
Bn-A03-p15708192	T/G/-	A03	14767940	+	NA	NA	NA	NA	NA	NA	T	T	T	T	T	T	T	T	T	T	T	T	T	T	T	T	T	T	T	T	T	T	T	T	T	T	T	T	T	T	T	T	T	T	T	T	T	T	T
Bn-A03-p15725925	A/G/-	A03	14790995	+	NA	NA	NA	NA	NA	NA	A	A	A	G	R	G	G	A	G	A	G	G	A	A	R	A	A	G	G	A	G	G	A	G	A	A	A	G	A	A	G	G	G	R	A	A	A	A	A
Bn-A03-p15739646	T/C/-	A03	14810068	+	NA	NA	NA	NA	NA	NA	T	T	C	C	C	C	C	T	C	C	C	C	C	C	C	T	T	C	C	T	C	C	C	C	T	T	T	C	T	T	C	C	C	Y	C	T	C	C	C
Bn-A03-p15744983	A/G/-	A03	14818508	+	NA	NA	NA	NA	NA	NA	G	G	G	G	G	G	G	G	G	G	G	G	G	G	G	G	G	G	G	G	G	G	G	G	G	G	G	G	G	G	G	G	G	G	G	G	A	G	G
Bn-A03-p15749083	A/C/-	A03	14820971	+	NA	NA	NA	NA	NA	NA	A	A	C	C	M	A	C	A	M	C	C	C	C	C	C	A	A	C	C	A	C	C	C	C	A	A	A	A	A	A	C	A	C	M	C	A	C	C	C
Bn-A03-p15768536	T/C/-	A03	14841203	+	NA	NA	NA	NA	NA	NA	T	T	T	T	T	T	T	T	T	T	T	T	T	T	T	T	T	T	T	T	T	T	T	T	T	T	T	T	T	T	T	T	T	T	T	T	C	T	T
Bn-A03-p15776756	T/C/-	A03	14849424	+	NA	NA	NA	NA	NA	NA	C	C	C	C	C	C	C	C	C	C	C	C	C	C	C	C	C	C	C	C	C	C	C	C	C	C	C	C	C	C	C	C	C	C	C	C	T	C	C
Bn-A03-p15811901	T/C/-	A03	14886258	+	NA	NA	NA	NA	NA	NA	T	T	C	T	Y	T	C	T	T	C	C	T	C	T	C	T	T	C	C	T	T	C	C	C	T	T	T	T	T	T	C	T	C	Y	C	T	C	C	C
Bn-A03-p15815965	T/C/-	A03	14892225	+	NA	NA	NA	NA	NA	NA	T	T	C	T	Y	T	C	T	T	T	T	T	C	T	-	T	T	C	C	T	T	C	C	C	T	T	T	T	T	T	T	T	C	-	T	T	T	T	C
Bn-A03-p15824796	A/G/-	A03	14904247	+	NA	NA	NA	NA	NA	NA	A	A	A	A	R	G	A	A	A	A	A	A	A	A	A	A	A	A	A	A	A	A	A	A	A	A	A	G	A	A	A	A	A	A	A	A	A	A	A
Bn-A03-p15828397	A/C/-	A03	14911926	+	NA	NA	NA	NA	NA	NA	A	A	A	A	M	C	A	A	A	A	A	A	A	A	A	A	A	A	A	A	A	A	A	A	A	A	A	C	A	A	A	A	A	A	A	A	A	A	A
Bn-A03-p15871284	T/C/-	A03	14958234	+	NA	NA	NA	NA	NA	NA	C	C	T	T	Y	C	C	C	T	C	C	T	T	C	Y	C	T	T	T	C	T	T	T	T	C	C	C	C	C	C	T	C	T	C	C	C	C	C	T
Bn-A03-p15875404	T/G/-	A03	14967684	+	NA	NA	NA	NA	NA	NA	G	G	T	T	T	T	G	G	T	G	T	T	T	T	K	G	T	T	T	G	T	T	T	T	G	G	G	T	G	G	T	G	T	G	G	G	G	G	T
Bn-A03-p15893952	A/G/-	A03	14978075	+	NA	NA	NA	NA	NA	NA	A	A	A	A	R	G	A	A	A	A	G	A	A	A	A	A	A	A	A	A	A	A	A	A	A	A	A	G	A	A	A	A	A	A	A	A	A	A	A
Bn-A03-p15894013	A/C/-	A03	14978136	+	NA	NA	NA	NA	NA	NA	C	C	C	C	M	A	C	C	C	C	A	C	C	C	C	C	C	C	C	C	C	C	C	C	C	C	C	A	C	C	C	C	C	C	C	C	C	C	C
Bn-A03-p15900189	A/C/-	A03	14981287	+	NA	NA	NA	NA	NA	NA	A	A	C	C	M	A	A	A	C	A	A	C	C	C	M	A	C	A	A	A	C	M	C	C	A	A	A	A	A	A	A	A	A	A	A	A	A	A	C
Bn-A03-p15906810	A/G/-	A03	14987907	+	NA	NA	NA	NA	NA	NA	G	G	A	A	R	G	G	G	A	G	G	A	A	A	R	G	A	G	G	G	A	R	A	A	G	G	G	G	G	G	G	G	G	G	G	G	G	G	A
Bn-A03-p15916054	T/G/-	A03	14995997	+	NA	NA	NA	NA	NA	NA	G	G	T	T	K	G	G	T	T	G	G	T	T	T	G	G	T	G	G	G	T	K	T	T	G	G	G	G	G	G	G	G	G	G	G	G	G	G	T
Bn-A03-p15916258	A/G/-	A03	14996201	+	NA	NA	NA	NA	NA	NA	G	G	A	A	R	G	G	A	A	G	G	A	A	A	G	G	A	G	G	G	A	R	A	A	G	G	G	G	G	G	G	G	G	G	G	G	G	G	A
Bn-A03-p15954297	T/C/-	A03	15032340	+	NA	NA	NA	NA	NA	NA	C	C	C	C	-	T	C	C	C	C	C	C	C	C	C	C	C	C	C	C	C	C	C	C	C	C	C	T	C	C	C	T	C	C	C	C	C	C	C
Bn-A03-p15957657	A/C/-	A03	15038093	+	NA	NA	NA	NA	NA	NA	C	C	C	C	M	A	C	C	C	C	C	C	C	C	C	C	C	C	C	C	C	C	C	C	C	C	C	A	C	C	C	A	C	C	C	C	C	C	C
Bn-A03-p15958035	A/G/-	A03	15038486	+	NA	NA	NA	NA	NA	NA	G	G	G	G	-	A	G	G	G	G	G	G	G	G	G	G	G	G	G	G	G	G	G	G	G	G	G	A	G	G	G	A	G	G	G	G	G	G	G
Bn-A03-p15960001	T/C/-	A03	15040275	+	NA	NA	NA	NA	NA	NA	C	C	C	C	Y	T	C	C	C	C	C	C	C	C	C	C	C	C	C	C	C	C	C	C	C	C	C	T	C	C	C	T	C	C	C	C	C	C	C
Bn-A03-p16017186	T/G/-	A03	15100308	+	NA	NA	NA	NA	NA	NA	T	T	T	T	T	T	T	T	T	T	T	T	T	G	T	T	T	T	T	T	T	T	T	T	T	T	T	T	T	T	T	T	T	T	T	T	T	T	T
Bn-A03-p16038553	T/C/-	A03	15121067	+	NA	NA	NA	NA	NA	NA	C	C	C	T	Y	T	C	C	T	C	C	T	C	T	C	C	C	T	Y	C	T	Y	C	C	C	C	C	T	C	C	C	C	T	C	C	C	C	C	C
Bn-A03-p16056249	T/C/-	A03	15137559	+	NA	NA	NA	NA	NA	NA	T	T	T	T	T	Y	T	T	T	T	T	T	T	T	T	T	T	T	T	T	T	T	T	T	T	T	T	C	T	T	T	T	T	T	T	T	T	T	T
Bn-A03-p16056460	T/C/-	A03	15137774	+	NA	NA	NA	NA	NA	NA	C	C	C	C	C	T	C	C	C	C	C	C	C	C	C	C	C	C	C	C	C	C	C	C	C	C	C	T	C	C	C	C	C	C	C	C	C	C	C
Bn-A03-p16056621	T/C/-	A03	15137941	+	NA	NA	NA	NA	NA	NA	T	T	T	T	T	T	T	T	T	T	T	T	T	T	T	T	T	T	T	T	T	T	T	T	T	T	T	T	T	T	T	T	T	T	T	T	T	T	T
Bn-A03-p16070543	A/G/-	A03	15158606	+	NA	NA	NA	NA	NA	NA	A	A	A	G	A	A	A	A	G	A	A	G	A	G	A	A	A	G	R	A	G	R	A	A	A	A	A	A	A	A	A	A	G	A	A	A	A	A	A
Bn-A03-p16079386	A/C/-	A03	15178485	+	NA	NA	NA	NA	NA	NA	C	C	C	A	C	A	A	A	A	A	C	A	C	A	C	C	M	A	M	A	A	M	C	C	C	C	C	A	C	C	C	A	A	C	C	C	C	C	C
Bn-A03-p16123758	A/G/-	A03	15217517	+	NA	NA	NA	NA	NA	NA	G	G	G	G	G	G	G	G	G	G	G	G	G	G	G	G	G	G	G	G	G	G	G	G	G	G	G	G	G	G	G	G	G	G	G	G	G	G	G
Bn-A03-p16126013	T/C/-	A03	15219771	+	NA	NA	NA	NA	NA	NA	C	C	C	C	C	C	C	C	C	C	C	C	C	C	C	C	C	C	C	C	C	C	C	C	C	C	C	C	C	C	C	C	C	C	C	C	C	C	C
Bn-A03-p16134415	A/G/-	A03	15228244	+	NA	NA	NA	NA	NA	NA	A	A	A	A	A	G	A	A	A	A	A	A	A	A	A	A	A	A	A	A	A	A	A	A	A	A	A	G	A	A	A	A	A	A	A	A	A	A	A
Bn-A03-p16158248	T/G/-	A03	15252805	+	NA	NA	NA	NA	NA	NA	T	T	T	T	T	G	T	T	T	T	T	T	T	T	T	T	T	T	T	T	T	T	T	T	T	T	T	G	T	T	T	T	T	T	T	T	T	T	T
Bn-A03-p16185537	A/G/-	A03	15274207	+	NA	NA	NA	NA	NA	NA	G	G	A	G	A	A	G	G	G	G	A	G	A	G	G	G	G	G	G	A	G	G	A	G	G	G	G	A	G	G	G	G	G	G	G	G	G	G	A
Bn-A03-p16211692	A/G/-	A03	15297400	+	NA	NA	NA	NA	NA	NA	A	A	A	A	A	G	A	A	A	A	A	A	A	A	A	A	A	A	A	G	A	A	A	A	A	A	A	G	A	A	A	A	A	A	A	A	A	A	A
Bn-A03-p16275650	A/G/-	A03	15403873	+	NA	NA	NA	NA	NA	NA	G	G	G	G	G	A	G	G	G	G	A	G	G	G	G	G	G	G	G	A	G	G	G	G	G	G	G	A	G	G	G	G	G	G	G	G	G	G	G
Bn-A03-p16284595	T/G/-	A03	15412046	+	NA	NA	NA	NA	NA	NA	T	T	T	T	T	T	T	T	T	T	-	T	T	T	T	T	T	T	T	G	T	T	T	T	T	T	T	T	T	T	T	T	T	T	T	T	T	T	T
Bn-A03-p16303181	A/G/-	A03	15429784	+	NA	NA	NA	NA	NA	NA	A	A	A	A	A	A	A	A	A	A	G	A	A	A	A	A	A	A	A	G	A	A	A	A	A	A	A	A	A	A	A	A	A	A	A	A	A	A	A
Bn-A03-p16303780	T/C/-	A03	15430383	+	NA	NA	NA	NA	NA	NA	T	T	T	T	T	T	T	T	T	T	C	T	T	T	T	T	T	T	T	C	T	T	T	T	T	T	T	T	T	T	T	T	T	T	T	T	T	T	T
Bn-A03-p16371467	T/C/-	A03	15498700	+	NA	NA	NA	NA	NA	NA	T	T	T	T	T	C	C	C	T	T	C	T	T	T	T	T	C	C	T	C	T	T	T	T	T	T	T	C	T	T	T	C	T	T	T	T	T	T	T
Bn-A03-p16378233	A/G/-	A03	15506566	+	NA	NA	NA	NA	NA	NA	G	G	G	G	G	G	A	G	G	G	A	G	G	G	G	G	G	G	G	G	G	G	G	G	G	G	G	G	G	G	G	G	G	G	G	G	G	G	G
Bn-A03-p16379045	A/G/-	A03	15507351	+	NA	NA	NA	NA	NA	NA	G	G	G	G	G	G	A	G	G	G	A	G	G	G	G	G	G	G	G	G	G	G	G	G	G	G	G	G	G	G	G	G	G	G	G	G	G	G	G
Bn-A03-p16404390	A/G/-	A03	15546010	+	NA	NA	NA	NA	NA	NA	A	A	A	A	A	G	G	G	A	A	G	A	A	A	A	A	G	G	A	G	A	A	A	A	A	A	A	G	A	A	A	G	A	A	A	A	A	A	A
Bn-A03-p16404538	A/G/-	A03	15546156	+	NA	NA	NA	NA	NA	NA	A	A	A	A	A	G	G	G	A	A	G	A	A	A	A	A	G	G	A	G	A	-	A	A	A	A	A	G	A	A	A	G	A	A	A	A	A	A	A
Bn-A03-p16405269	A/C/-	A03	15546889	+	NA	NA	NA	NA	NA	NA	A	A	A	A	A	A	C	C	A	A	C	A	A	A	A	A	C	C	A	C	A	A	A	A	A	A	A	A	A	A	A	C	A	A	A	A	A	A	A
Bn-A03-p16422604	T/C/-	A03	15564954	+	NA	NA	NA	NA	NA	NA	T	T	T	T	T	C	T	T	T	T	T	T	T	T	T	T	T	T	T	T	T	T	T	T	T	T	T	C	T	T	T	T	T	T	T	T	T	T	T
Bn-scaff_17298_1-p705887	T/C/-	A03	15565904	+	NA	NA	NA	NA	NA	NA	T	T	T	T	T	T	C	C	T	C	C	T	T	T	T	T	C	C	T	C	T	T	T	T	T	T	T	T	T	T	T	C	T	T	T	T	T	C	T
Bn-A03-p16431100	T/C/-	A03	15568261	+	NA	NA	NA	NA	NA	NA	T	T	T	C	T	-	C	C	C	C	C	C	T	T	T	T	C	C	T	T	C	T	T	T	T	T	T	-	T	T	T	C	T	T	T	T	T	C	T
Bn-A03-p16437979	T/C/-	A03	15573072	+	NA	NA	NA	NA	NA	NA	T	T	T	C	T	-	C	C	C	C	C	C	T	T	T	T	C	C	T	T	C	T	T	T	T	T	T	-	T	T	T	C	T	T	T	T	T	C	T
Bn-A03-p16444510	T/C/-	A03	15580412	+	NA	NA	NA	NA	NA	NA	C	C	C	T	C	C	T	T	T	T	T	T	C	C	C	C	T	T	C	C	T	C	C	C	C	C	C	C	C	C	C	T	C	C	C	C	C	T	C
Bn-A03-p16454331	A/C/-	A03	15594658	+	NA	NA	NA	NA	NA	NA	A	A	A	C	A	C	C	A	C	A	C	C	A	A	A	A	M	A	A	A	C	A	A	A	A	A	A	C	A	A	A	A	A	A	A	A	A	C	A
Bn-A03-p16482731	A/C/-	A03	15620052	+	NA	NA	NA	NA	NA	NA	A	A	C	A	C	A	A	C	A	C	A	A	C	A	A	A	M	C	A	A	A	A	C	A	A	A	A	A	A	A	A	A	A	A	A	A	A	A	C
Bn-scaff_17298_1-p795098	T/G/-	A03	15635730	+	NA	NA	NA	NA	NA	NA	T	T	G	-	G	T	T	G	T	G	T	T	G	T	T	T	T	G	T	T	T	T	G	T	T	T	T	T	T	T	T	T	T	T	T	T	T	T	G
Bn-A03-p16607714	A/C/-	A03	15721886	+	NA	NA	NA	NA	NA	NA	C	C	C	C	A	C	C	C	C	A	C	C	A	C	C	C	C	C	C	C	C	C	A	C	C	C	C	C	C	C	C	C	C	C	C	C	C	C	A
Bn-A03-p16611349	A/G/-	A03	15725556	+	NA	NA	NA	NA	NA	NA	G	G	G	G	A	G	G	G	G	A	G	G	A	G	G	G	G	G	G	G	G	G	A	G	G	G	G	G	G	G	G	G	G	G	G	G	G	G	A
Bn-A03-p16742011	A/G/-	A03	15873548	+	NA	NA	NA	NA	NA	NA	G	G	G	G	G	G	G	G	G	G	G	G	G	G	G	G	G	G	G	G	G	G	G	G	G	G	G	G	G	G	G	G	G	G	G	G	G	G	G
Bn-A03-p16759411	A/G/-	A03	15887505	+	NA	NA	NA	NA	NA	NA	A	A	A	A	A	A	A	A	A	A	A	A	A	A	A	A	A	A	A	A	A	A	A	A	A	A	A	A	A	A	A	A	A	A	A	A	A	A	A
Bn-A03-p16811562	T/C/-	A03	15967292	+	NA	NA	NA	NA	NA	NA	T	T	T	T	T	T	T	T	T	T	T	T	T	T	T	T	T	T	T	T	T	T	T	T	T	T	T	T	T	T	T	T	T	T	T	T	T	T	T
Bn-A03-p16852209	T/G/-	A03	16012380	+	NA	NA	NA	NA	NA	NA	T	T	T	T	T	T	T	T	T	T	T	T	T	T	T	T	T	T	T	T	T	T	T	T	T	T	T	T	T	T	T	T	T	T	T	T	T	T	T
Bn-A03-p16901041	A/C/-	A03	16074819	+	NA	NA	NA	NA	NA	NA	A	A	A	A	A	A	A	A	A	A	A	A	A	A	C	A	A	A	A	A	A	A	A	A	A	A	A	A	A	A	A	A	A	A	A	A	A	C	A
Bn-A03-p17019251	T/C/-	A03	16172981	+	NA	NA	NA	NA	NA	NA	T	T	T	T	T	T	T	T	T	T	T	T	T	T	T	T	T	T	T	T	T	Y	T	Y	T	T	T	T	T	T	T	T	T	T	T	T	T	C	T
Bn-A03-p17038965	T/C/-	A03	16191170	+	NA	NA	NA	NA	NA	NA	T	T	T	T	T	T	T	T	T	T	T	T	T	T	T	T	T	T	T	T	T	T	T	T	T	T	T	T	T	T	T	T	T	T	T	T	T	-	T
Bn-A03-p17056395	A/G/-	A03	16208595	+	NA	NA	NA	NA	NA	NA	A	A	A	A	A	A	A	A	A	A	A	A	A	A	A	A	A	A	A	A	A	A	A	A	A	A	A	A	A	A	A	A	A	A	A	A	A	G	A
Bn-A03-p17139931	A/G/-	A03	16286257	+	NA	NA	NA	NA	NA	NA	G	G	G	G	G	G	G	G	G	G	G	G	G	G	G	G	G	G	G	G	G	G	G	G	G	G	G	G	G	G	G	G	G	G	G	G	G	G	G
Bn-A03-p17182494	A/C/-	A03	16329522	+	NA	NA	NA	NA	NA	NA	C	C	C	C	A	A	A	C	A	A	A	C	A	C	C	C	M	C	C	C	C	A	A	A	C	C	C	A	C	C	C	C	C	C	A	C	C	A	A
Bn-A03-p17184441	T/C/-	A03	16331471	+	NA	NA	NA	NA	NA	NA	T	T	T	T	C	C	C	T	C	C	C	T	C	T	T	T	Y	T	T	T	T	C	C	C	T	T	T	C	T	T	T	T	T	T	C	T	T	C	C
Bn-A03-p17213825	T/C/-	A03	16354140	+	NA	NA	NA	NA	NA	NA	C	C	C	C	C	C	C	C	C	C	C	C	C	C	C	C	C	C	C	C	C	C	C	C	C	C	C	C	C	C	C	C	C	C	C	C	C	C	C
Bn-A03-p17217528	T/G/-	A03	16357981	+	NA	NA	NA	NA	NA	NA	T	T	T	T	T	T	T	T	T	T	T	T	T	T	T	T	T	T	T	T	T	T	T	T	T	T	T	T	T	T	T	T	T	T	T	T	T	T	T
Bn-A03-p17281617	T/C/-	A03	16423339	+	NA	NA	NA	NA	NA	NA	T	T	T	T	C	C	T	T	C	T	T	T	T	T	T	T	T	T	T	T	T	T	T	T	T	T	T	C	T	T	T	T	T	T	T	T	T	T	T
Bn-A03-p17985410	A/G/-	A03	16992552	+	NA	NA	NA	NA	NA	NA	A	A	A	A	A	A	A	A	A	A	A	A	A	A	A	A	A	A	A	A	A	A	A	A	A	A	A	A	A	A	A	A	A	A	A	A	A	A	A
Bn-A03-p17986611	A/G/-	A03	16993754	+	NA	NA	NA	NA	NA	NA	A	A	A	A	A	A	A	A	A	A	A	A	A	A	A	A	A	A	A	A	A	A	A	A	A	A	A	A	A	A	A	A	A	A	A	A	A	A	A
Bn-A03-p18019822	A/G/-	A03	17025696	+	NA	NA	NA	NA	NA	NA	A	A	A	A	A	A	A	G	A	A	A	G	G	A	A	G	G	G	A	A	G	G	A	G	G	A	G	A	A	A	A	A	A	G	G	R	G	A	A
Bn-A03-p18025565	T/C/-	A03	17031139	+	NA	NA	NA	NA	NA	NA	T	T	T	T	T	T	T	C	T	T	T	C	C	T	T	C	C	C	T	T	C	C	T	C	C	T	C	T	T	T	T	T	T	C	C	Y	C	T	T
Bn-A03-p18025753	A/C/-	A03	17031327	+	NA	NA	NA	NA	NA	NA	C	C	C	C	C	C	C	A	C	C	C	A	M	C	C	A	M	A	C	C	M	A	C	-	A	C	A	C	C	C	C	C	C	A	A	M	A	C	C
Bn-A03-p18183550	T/C/-	A03	17180232	+	NA	NA	NA	NA	NA	NA	C	C	T	C	C	C	C	C	C	C	C	T	T	C	C	Y	C	C	C	T	T	C	C	C	T	C	T	C	T	C	T	T	C	Y	T	Y	C	C	C
Bn-scaff_16310_1-p44871	A/G/-	A03	17251032	+	NA	NA	NA	NA	NA	NA	G	A	G	G	A	A	G	A	G	G	G	A	G	G	A	G	G	A	G	R	A	G	A	G	G	G	G	A	G	G	G	G	G	G	-	G	G	A	A
Bn-A03-p18414643	A/G/-	A03	17411173	+	NA	NA	NA	NA	NA	NA	G	G	A	A	G	G	G	A	G	G	G	R	G	G	G	G	A	A	G	G	G	G	G	G	A	G	A	A	A	G	G	G	G	R	G	R	R	A	G
Bn-A03-p18455932	A/C/-	A03	17449059	+	NA	NA	NA	NA	NA	NA	A	A	C	C	A	-	A	C	A	A	A	-	A	A	A	A	C	C	C	A	A	A	A	A	C	A	C	C	C	A	A	-	-	-	A	M	-	-	-
Bn-A03-p18462261	A/C/-	A03	17460514	+	NA	NA	NA	NA	NA	NA	M	M	M	A	M	-	M	A	M	M	M	A	M	M	M	M	A	A	M	M	M	M	M	M	M	M	-	A	M	M	M	M	M	M	M	M	M	M	-
Bn-A03-p18468633	A/G/-	A03	17470248	+	NA	NA	NA	NA	NA	NA	G	G	G	A	G	G	G	A	G	G	G	R	G	G	G	G	A	A	G	G	G	G	G	G	G	G	G	A	G	G	G	G	G	G	G	G	G	G	G
Bn-A03-p18471820	T/C/-	A03	17473443	+	NA	NA	NA	NA	NA	NA	T	T	T	C	T	T	T	C	T	T	T	Y	T	T	T	T	C	C	T	T	T	T	T	T	T	T	T	C	T	T	T	T	T	T	T	T	T	T	T
Bn-A06-p6363956	A/G/-	A03	17488893	+	NA	NA	NA	NA	NA	NA	A	A	G	R	A	G	A	A	G	A	A	A	A	A	G	A	-	A	A	A	A	G	A	G	A	A	A	G	A	A	A	G	A	A	A	A	A	A	G
Bn-A03-p18570046	T/G/-	A03	17576929	+	NA	NA	NA	NA	NA	NA	T	T	T	G	T	T	G	G	T	T	G	K	T	T	T	T	G	G	T	T	T	T	T	T	T	T	T	G	T	T	T	T	T	T	T	T	T	G	G
Bn-A03-p18593371	T/C/-	A03	17607314	+	NA	NA	NA	NA	NA	NA	C	C	C	T	C	C	T	T	C	C	T	Y	C	C	C	C	Y	T	C	C	C	T	C	T	C	C	C	T	C	C	T	C	C	C	C	C	C	T	T
Bn-A03-p18593905	A/G/-	A03	17607846	+	NA	NA	NA	NA	NA	NA	A	A	A	G	A	A	G	G	A	A	G	-	A	A	A	A	R	G	A	A	A	G	A	G	A	A	A	G	A	A	G	A	A	A	A	A	A	G	G
Bn-A03-p18594273	T/C/-	A03	17608214	+	NA	NA	NA	NA	NA	NA	T	T	T	C	T	T	C	C	T	T	C	Y	T	T	T	T	Y	C	T	T	T	C	T	C	T	T	T	C	T	T	C	T	T	T	T	T	T	C	C
Bn-A03-p18602597	T/C/-	A03	17615946	+	NA	NA	NA	NA	NA	NA	T	T	T	C	T	T	T	C	T	T	T	Y	T	T	T	T	T	C	T	T	T	C	T	C	T	T	T	C	T	T	C	T	T	T	T	T	T	C	T
Bn-A03-p18606297	T/C/-	A03	17620342	+	NA	NA	NA	NA	NA	NA	C	C	C	T	C	C	C	T	C	C	-	Y	C	-	C	C	Y	T	C	C	C	T	C	T	C	-	C	T	C	C	T	C	C	-	C	-	C	T	C
Bn-A03-p18618990	A/G/-	A03	17636069	+	NA	NA	NA	NA	NA	NA	G	G	G	A	G	G	G	A	G	G	G	R	G	G	G	G	R	A	G	G	G	A	G	A	G	G	G	A	G	G	A	G	G	G	G	G	G	A	G
Bn-A03-p18622329	A/G/-	A03	17640439	+	NA	NA	NA	NA	NA	NA	G	G	G	A	G	G	G	A	G	G	G	R	G	G	G	G	R	A	G	G	G	A	G	A	G	G	G	A	G	G	A	G	G	G	G	G	G	A	G
Bn-A03-p18638146	T/C/-	A03	17661656	+	NA	NA	NA	NA	NA	NA	T	T	C	T	C	C	C	T	C	C	C	Y	C	T	C	Y	T	T	C	C	C	T	T	T	C	T	C	T	C	T	T	C	T	C	C	Y	Y	T	C
Bn-A03-p18682521	T/C/-	A03	17710827	+	NA	NA	NA	NA	NA	NA	C	C	T	C	T	T	T	C	T	T	T	-	C	C	T	-	C	C	T	T	T	C	C	C	T	C	T	C	T	C	C	T	C	T	T	Y	Y	C	T
Bn-A03-p18692928	A/G/-	A03	17720501	+	NA	NA	NA	NA	NA	NA	G	G	G	A	G	G	G	G	G	G	G	G	A	G	G	G	G	G	G	G	G	A	G	A	G	G	G	A	G	G	A	G	G	G	G	G	G	A	G
Bn-A03-p18737967	T/C/-	A03	17753620	+	NA	NA	NA	NA	NA	NA	C	C	C	T	C	C	C	C	C	C	C	C	T	C	C	C	C	C	C	C	C	T	C	T	C	C	C	T	C	C	T	C	C	C	C	C	C	T	C
[truncated: 13,313 more rows]
[truncated: 189 more columns]

## Sheet: Table S3
Table S3 Distribution of SNP markers across the A- and C-subgenomes
Subgenomes	Chromosomes	Chromosome size (bp)	Number of SNPs	SNP density per Mb
A	A01	23267856	656	28.19
	A02	24793737	500	20.17
	A03	29767490	1291	43.37
	A04	19151660	814	42.5
	A05	23067598	907	39.32
	A06	24396386	900	36.89
	A07	24006521	1200	49.99
	A08	18961941	586	30.9
	A09	33865340	605	17.86
	A10	17398227	703	40.41
C	C01	38829317	775	19.96
	C02	46221804	702	15.19
	C03	60573394	1429	23.59
	C04	48930237	1057	21.6
	C05	43185227	488	11.3
	C06	37225952	764	20.52
	C07	44770477	838	18.72
	C08	38477087	673	17.49
	C09	48508220	423	8.72

## Sheet: Table S4
Table S4 Subpopulation classification of accessions inferred from STRUCTURE analysis
Taxa	Subpopulation	Donor
1013_CR0581	1	IPK genebank
1028_CR0765	1	IPK genebank
1107_CR3254	1	IPK genebank
1141_B0015822746	1	DSV-Breeding
1142_B0015835312	1	DSV-Breeding
1143_B0015822465	1	DSV-Breeding
1145_B0015829631	1	DSV-Breeding
1148_B0015829628	1	DSV-Breeding
1151_B0015835309	1	DSV-Breeding
1152_B0015835310	1	DSV-Breeding
1153_B0015835311	1	DSV-Breeding
1156_B0015822699	1	DSV-Breeding
1157_B0015822772	1	DSV-Breeding
1158_B0015823161	1	DSV-Breeding
1159_B0015823213	1	DSV-Breeding
1160_B0015830716	1	DSV-Breeding
1161_B0015823229	1	DSV-Breeding
1162_B0015823230	1	DSV-Breeding
1163_B0015830726	1	DSV-Breeding
1164_B0015830736	1	DSV-Breeding
1165_B0015822569	1	DSV-Breeding
1166_B0015822475	1	DSV-Breeding
1178_B0015822340	1	DSV-Breeding
1184_B0015823674	1	DSV-Breeding
1185_B0015823833	1	DSV-Breeding
1186_B0015823915	1	DSV-Breeding
1187_B0015823964	1	DSV-Breeding
1188_B0015824072	1	DSV-Breeding
1190_B0015824431	1	DSV-Breeding
1193_B0015821958	1	DSV-Breeding
1203_B0015820809	1	DSV-Breeding
1210_B0015822738	1	DSV-Breeding
1212_B0015822842	1	DSV-Breeding
1213_B0015823163	1	DSV-Breeding
1215_B0015823117	1	DSV-Breeding
1216_B0015825371	1	DSV-Breeding
1218_B0015825408	1	DSV-Breeding
1219_B0015825420	1	DSV-Breeding
1220_B0015825444	1	DSV-Breeding
1221_B0015825452	1	DSV-Breeding
1222_B0015825513	1	DSV-Breeding
1223_B0015823318	1	DSV-Breeding
1224_B0015830838	1	DSV-Breeding
1243_B9000050248	1	DSV-Breeding
1244_B0015826247	1	DSV-Breeding
1246_B9000050277	1	DSV-Breeding
1247_B9000050001	1	DSV-Breeding
1248_B0015826380	1	DSV-Breeding
1250_B0015835051	1	DSV-Breeding
1254_B9000050309	1	DSV-Breeding
1255_B9000050284	1	DSV-Breeding
1256_B9000050292	1	DSV-Breeding
1257_B9000050294	1	DSV-Breeding
1258_20|5|83-17EP5	1	DSV-Breeding
1259_21|5|83-501EP1	1	DSV-Breeding
1260_21|5|83-441EP4	1	DSV-Breeding
1261_20|5|935-51010EP991	1	DSV-Breeding
1262_20|5|83-622EP2	1	DSV-Breeding
1263_21|5|83-539EP2	1	DSV-Breeding
1265_20|5|924-5059EP4	1	DSV-Breeding
1284_B9000051314	1	DSV-Breeding
1285_B9000052284	1	DSV-Breeding
1286_B9000000072	1	DSV-Breeding
1287_B9000051207	1	DSV-Breeding
1288_B9000000092	1	DSV-Breeding
1289_B9000051329	1	DSV-Breeding
1290_B9000052289	1	DSV-Breeding
1291_B9000051262	1	DSV-Breeding
1292_B9000051285	1	DSV-Breeding
1294_B0015822482	1	DSV-Breeding
1295_B0015832101	1	DSV-Breeding
1296_B0015832103	1	DSV-Breeding
1297_B0015832094	1	DSV-Breeding
1298_B0015832095	1	DSV-Breeding
1299_B0015832097	1	DSV-Breeding
1300_B0015832100	1	DSV-Breeding
1301_B9000001172	1	DSV-Breeding
1303_B0015832106	1	DSV-Breeding
1306_B0015829709	1	DSV-Breeding
1001_CR0162	2	IPK genebank
1002_CR0163	2	IPK genebank
1004_CR0183	2	IPK genebank
1005_CR0234	2	IPK genebank
1006_CR0235	2	IPK genebank
1007_CR0270	2	IPK genebank
1008_CR0271	2	IPK genebank
1010_CR0303	2	IPK genebank
1011_CR0317	2	IPK genebank
1014_CR0583	2	IPK genebank
1015_CR0624	2	IPK genebank
1017_CR0633	2	IPK genebank
1022_CR0680	2	IPK genebank
1023_CR0704	2	IPK genebank
1024_CR0724	2	IPK genebank
1027_CR0764	2	IPK genebank
1029_CR0775	2	IPK genebank
1030_CR0790	2	IPK genebank
1032_CR0807	2	IPK genebank
1033_CR0812	2	IPK genebank
1034_CR0814	2	IPK genebank
1035_CR0832	2	IPK genebank
1036_CR0844	2	IPK genebank
1037_CR0861	2	IPK genebank
1038_CR0881	2	IPK genebank
1039_CR0882	2	IPK genebank
1040_CR0883	2	IPK genebank
1042_CR0899	2	IPK genebank
1045_CR0992	2	IPK genebank
1047_CR1000	2	IPK genebank
1048_CR1011	2	IPK genebank
1049_CR1014	2	IPK genebank
1051_CR1023	2	IPK genebank
1052_CR1025	2	IPK genebank
1053_CR1027	2	IPK genebank
1054_CR1029	2	IPK genebank
1055_CR1032	2	IPK genebank
1056_CR1050	2	IPK genebank
1057_CR1051	2	IPK genebank
1059_CR1054	2	IPK genebank
1061_CR1056	2	IPK genebank
1062_CR1099	2	IPK genebank
1064_CR1101	2	IPK genebank
1065_CR1170	2	IPK genebank
1066_CR1171	2	IPK genebank
1068_CR1861	2	IPK genebank
1069_CR1883	2	IPK genebank
1070_CR1885	2	IPK genebank
1071_CR1886	2	IPK genebank
1072_CR1887	2	IPK genebank
1073_CR2004	2	IPK genebank
1074_CR2005	2	IPK genebank
1075_CR2012	2	IPK genebank
1076_CR2013	2	IPK genebank
1077_CR2014	2	IPK genebank
1078_CR2015	2	IPK genebank
1079_CR2214	2	IPK genebank
1081_CR2256	2	IPK genebank
1082_CR2258	2	IPK genebank
1085_CR2264	2	IPK genebank
1087_CR2283	2	IPK genebank
1088_CR2321	2	IPK genebank
1089_CR2412	2	IPK genebank
1091_CR2614	2	IPK genebank
1093_CR2633	2	IPK genebank
1094_CR2674	2	IPK genebank
1095_CR3017	2	IPK genebank
1098_CR3023	2	IPK genebank
1099_CR3033	2	IPK genebank
1100_CR3034	2	IPK genebank
1108_CR3255	2	IPK genebank
1109_CR3256	2	IPK genebank
1110_CR3282	2	IPK genebank
1111_CR3283	2	IPK genebank
1112_CR3284	2	IPK genebank
1113_CR3290	2	IPK genebank
1114_CR3292	2	IPK genebank
1115_CR3301	2	IPK genebank
1117_CR3402	2	IPK genebank
1120_CR3431	2	IPK genebank
1124_CR3504	2	IPK genebank
1125_CR3505	2	IPK genebank
1126_CR3524	2	IPK genebank
1128_CR3566	2	IPK genebank
1130_B0015821880	2	DSV-Breeding
1133_B0015821892	2	DSV-Breeding
1136_B0015822275	2	DSV-Breeding
1137_B0015822285	2	DSV-Breeding
1138_B0015822408	2	DSV-Breeding
1139_B0015822106	2	DSV-Breeding
1140_B0015822096	2	DSV-Breeding
1173_B0015822156	2	DSV-Breeding
1176_B0015822302	2	DSV-Breeding
1177_B0015823255	2	DSV-Breeding
1181_B0015822418	2	DSV-Breeding
1182_B0015822428	2	DSV-Breeding
1191_B0015821875	2	DSV-Breeding
1192_B0015821883	2	DSV-Breeding
1194_B0015822179	2	DSV-Breeding
1195_B0015822264	2	DSV-Breeding
1198_B0015820617	2	DSV-Breeding
1199_B0015820630	2	DSV-Breeding
1214_B0015823242	2	DSV-Breeding
1225_B9000000714	2	DSV-Breeding
1226_B9000000718	2	DSV-Breeding
1227_B9000000719	2	DSV-Breeding
1228_B9000000491	2	DSV-Breeding
1229_B9000000742	2	DSV-Breeding
1230_B9000000758	2	DSV-Breeding
1231_B9000000484	2	DSV-Breeding
1232_B9000000490	2	DSV-Breeding
1233_B9000000826	2	DSV-Breeding
1234_B9000000487	2	DSV-Breeding
1235_B9000000774	2	DSV-Breeding
1236_B9000000754	2	DSV-Breeding
1237_B9000000747	2	DSV-Breeding
1239_B9000000493	2	DSV-Breeding
1240_B9000000737	2	DSV-Breeding
1241_B9000000508	2	DSV-Breeding
1242_B9000000709	2	DSV-Breeding
1251_B0015835143	2	DSV-Breeding
1252_B0015835194	2	DSV-Breeding
1264_20|5|83-627EP8	2	DSV-Breeding
1266_20|5|924-5079EP5	2	DSV-Breeding
1268_19|5|924-5067EP2	2	DSV-Breeding
1269_B9000051371	2	DSV-Breeding
1270_B9000051353	2	DSV-Breeding
1271_B9000051247	2	DSV-Breeding
1272_B9000051380	2	DSV-Breeding
1273_B9000051397	2	DSV-Breeding
1274_B9000000148	2	DSV-Breeding
1275_B9000000374	2	DSV-Breeding
1277_B9000051229	2	DSV-Breeding
1278_B9000051267	2	DSV-Breeding
1279_B9000051269	2	DSV-Breeding
1280_B9000051279	2	DSV-Breeding
1281_B9000051392	2	DSV-Breeding
1282_B9000051275	2	DSV-Breeding
1283_B9000051307	2	DSV-Breeding
1293_B9000051237	2	DSV-Breeding
1302_B0015832108	2	DSV-Breeding
1304_B0016092198	2	DSV-Breeding
1305_B0015829708	2	DSV-Breeding
1307_B0016092523	2	DSV-Breeding
1308_B0016092524	2	DSV-Breeding
1309_B0015829711	2	DSV-Breeding
1310_17|805|635-1023EP1	2	DSV-Breeding
1311_17|805|635-1107EP1	2	DSV-Breeding
1312_18|805|634-1091EP1	2	DSV-Breeding

## Sheet: Table S5
Table S5 Comprehensive list of annotated candidate genes identified within the LD regions surrounding significant SNPs via BLAST analysis
Darmor Gene ID	Arabidopsis thaliana Gene ID	Arabidopsis thaliana gene name	Genomic position	Function	Description
BnaA03g47820D	AT4G26070	MKK1	chrA03:24560638 - 24563048	MAP kinase/ ERK kinase 1 (MEK1); CONTAINS InterPro DOMAIN/s Protein kinase, ATP binding site (InterProIPR017441), Protein kinase, catalytic domain (InterProIPR000719), Serine/threonineprotein kinase domain (InterProIPR002290), Tyrosineprotein kinase, catalytic domain (InterProIPR020635), Serine/threonineprotein kinaselike domain (InterProIPR017442), Protein kinaselike domain (InterProIPR011009), …	mitogen
BnaA03g47830D	AT4G26080	ABI1	chrA03:24563270 - 24566288	ABA INSENSITIVE 1 (ABI1); CONTAINS InterPro DOMAIN/s Protein phosphatase 2C, manganese/magnesium aspartate binding site (InterProIPR000222), Protein phosphatase 2Crelated (InterProIPR001932), Protein phosphatase 2C (InterProIPR015655), Protein phosphatase 2C, Nterminal (InterProIPR014045); BEST Arabidopsis thaliana protein match is Protein phosphatase 2C family protein (TAIRAT5G57050.1); Has 6864…	ABA insensitive PP2C protein 1 [Brassica napus]
BnaA03g47840D	AT4G26140	BGAL12	chrA03:24571473 - 24576035	betagalactosidase 12 (BGAL12); FUNCTIONS IN cation binding, betagalactosidase activity, hydrolase activity, hydrolyzing Oglycosyl compounds, catalytic activity; INVOLVED IN lactose catabolic process, using glucoside 3dehydrogenase, carbohydrate metabolic process, lactose catabolic process via UDPgalactose, lactose catabolic process; LOCATED IN cell wall; EXPRESSED IN 21 plant structures; EXPRESSE…	beta
BnaA03g47850D	AT3G57990	--	chrA03:24577989 - 24578288	unknown protein; Has 1497 Blast hits to 1323 proteins in 52 species	Archae
BnaA03g47860D	AT4G26150	GATA22	chrA03:24590485 - 24592208	cytokininresponsive gata factor 1 (CGA1); CONTAINS InterPro DOMAIN/s Zinc finger, NHR/GATAtype (InterProIPR013088), Zinc finger, GATAtype (InterProIPR000679); BEST Arabidopsis thaliana protein match is GATA type zinc finger transcription factor family protein (TAIRAT5G56860.1); Has 1630 Blast hits to 1587 proteins in 190 species Archae 0; Bacteria 0; Metazoa 106; Fungi 659; Plants 751; Viruses 0;…	putative GATA transcription factor 22 [Arabidopsis thaliana] >gi|71660811|sp|Q9SZI6.1|GAT22_ARATH RecName
BnaA03g47870D	AT4G26150	GATA22	chrA03:24596130 - 24597812	cytokininresponsive gata factor 1 (CGA1); CONTAINS InterPro DOMAIN/s Zinc finger, NHR/GATAtype (InterProIPR013088), Zinc finger, GATAtype (InterProIPR000679); BEST Arabidopsis thaliana protein match is GATA type zinc finger transcription factor family protein (TAIRAT5G56860.1); Has 1630 Blast hits to 1587 proteins in 190 species Archae 0; Bacteria 0; Metazoa 106; Fungi 659; Plants 751; Viruses 0;…	putative GATA transcription factor 22 [Arabidopsis thaliana] >gi|71660811|sp|Q9SZI6.1|GAT22_ARATH RecName
BnaA03g47880D	AT4G26200	ACS7	chrA03:24633221 - 24634916	1aminocyclopropane1carboxylate synthase 7 (ACS7); CONTAINS InterPro DOMAIN/s 1aminocyclopropane1carboxylate synthase (InterProIPR001176), Pyridoxal phosphatedependent transferase, major domain (InterProIPR015424), Aminotransferase, class I/classII (InterProIPR004839), Aminotransferases, classI, pyridoxalphosphatebinding site (InterProIPR004838), Pyridoxal phosphatedependent transferase, major reg…	1
BnaA03g47890D	AT4G26240	--	chrA03:24638302 - 24639814	unknown protein; Has 30201 Blast hits to 17322 proteins in 780 species	Archae
BnaA03g47900D	AT4G26210	--	chrA03:24639906 - 24641365	Mitochondrial ATP synthase subunit G protein; FUNCTIONS IN hydrogen ion transmembrane transporter activity; INVOLVED IN proton transport, ATP synthesis coupled proton transport; LOCATED IN mitochondrial protontransporting ATP synthase complex, coupling factor F(o); EXPRESSED IN 22 plant structures; EXPRESSED DURING 13 growth stages; CONTAINS InterPro DOMAIN/s ATPase, F0 complex, subunit G, mitoch…	mitochondrial ATP synthase g subunit family protein [Arabidopsis lyrata subsp. lyrata] >gi|297315458|gb|EFH45881.1| mitochondrial ATP synthase g subunit family protein [Arabidopsis lyrata subsp. lyrata]
BnaA03g47910D	AT4G26260	MIOX4	chrA03:24653637 - 24656658	myoinositol oxygenase 4 (MIOX4); FUNCTIONS IN inositol oxygenase activity; INVOLVED IN Lascorbic acid biosynthetic process, syncytium formation; LOCATED IN cytoplasm; EXPRESSED IN 19 plant structures; EXPRESSED DURING 8 growth stages; CONTAINS InterPro DOMAIN/s Protein of unknown function DUF706 (InterProIPR007828); BEST Arabidopsis thaliana protein match is myoinositol oxygenase 5 (TAIRAT5G56640…	myo
BnaA03g47920D	AT4G26280	SOT3	chrA03:24657354 - 24658344	Ploop containing nucleoside triphosphate hydrolases superfamily protein; FUNCTIONS IN sulfotransferase activity; INVOLVED IN biological_process unknown; LOCATED IN cellular_component unknown; EXPRESSED IN embryo, sepal, flower, seed; EXPRESSED DURING petal differentiation and expansion stage, E expanded cotyledon stage; CONTAINS InterPro DOMAIN/s Sulfotransferase domain (InterProIPR000863); BEST …	predicted protein [Arabidopsis lyrata subsp. lyrata] >gi|297313408|gb|EFH43831.1| predicted protein [Arabidopsis lyrata subsp. lyrata]
BnaA03g47930D	AT4G26300	emb1027	chrA03:24659340 - 24663144	embryo defective 1027 (emb1027); FUNCTIONS IN nucleotide binding, aminoacyltRNA ligase activity, argininetRNA ligase activity, ATP binding; INVOLVED IN arginyltRNA aminoacylation, embryo development ending in seed dormancy; LOCATED IN mitochondrion, chloroplast; EXPRESSED IN 24 plant structures; EXPRESSED DURING 13 growth stages; CONTAINS InterPro DOMAIN/s AminoacyltRNA synthetase, class I, conse…	ArginyltRNA synthetase, class Ic [Arabidopsis thaliana] >gi|2632105|emb|CAB11468.1| arginyltRNA synthetase [Arabidopsis thaliana] >gi|4539426|emb|CAB38959.1| arginyltRNA synthetase [Arabidopsis thaliana] >gi|7269482|emb|CAB79485.1| arginyltRNA synthetase [Arabidopsis thaliana] >gi|332659782|gb|AEE85182.1| ArginyltRNA synthetase, class Ic [Arabidopsis thaliana]
BnaA03g47940D	AT4G26320	AGP13	chrA03:24664279 - 24664459	arabinogalactan protein 13 (AGP13); BEST Arabidopsis thaliana protein match is	arabinogalactan protein 14 (TAIR
BnaA03g47950D	AT5G56520	--	chrA03:24665696 - 24665990	unknown protein; BEST Arabidopsis thaliana protein match is	unknown protein (TAIR
BnaA03g47960D	AT4G26330	UNE17	chrA03:24666941 - 24671881	UNFERTILIZED EMBRYO SAC 17 (UNE17); FUNCTIONS IN identical protein binding, serinetype endopeptidase activity; INVOLVED IN proteolysis, double fertilization forming a zygote and endosperm; LOCATED IN peroxisome, cytoplasm; EXPRESSED IN male gametophyte, leaf, pollen tube; EXPRESSED DURING L mature pollen stage, M germinated pollen stage; CONTAINS InterPro DOMAIN/s Proteaseassociated PA (InterProI…	protein UNFERTILIZED EMBRYO SAC 17 [Arabidopsis thaliana] >gi|4539429|emb|CAB38962.1| subtilisin protease
BnaA03g47970D	AT4G26340	--	chrA03:24675250 - 24676687	Fbox/RNIlike/FBDlike domainscontaining protein; CONTAINS InterPro DOMAIN/s FBD (InterProIPR013596), Fbox domain, cyclinlike (InterProIPR001810), Fbox domain, Skp2like (InterProIPR022364), FBDlike (InterProIPR006566), Leucinerich repeat 2 (InterProIPR013101); BEST Arabidopsis thaliana protein match is Fbox/RNIlike/FBDlike domainscontaining protein (TAIRAT4G26350.1); Has 2167 Blast hits to 2117 pro…	F
BnaA03g47980D	AT4G26370	--	chrA03:24678152 - 24680160	antitermination NusB domaincontaining protein; FUNCTIONS IN RNA binding; INVOLVED IN regulation of transcription, DNAdependent; LOCATED IN chloroplast; EXPRESSED IN 20 plant structures; EXPRESSED DURING 13 growth stages; CONTAINS InterPro DOMAIN/s NusB/RsmB/TIM44 (InterProIPR006027); Has 30201 Blast hits to 17322 proteins in 780 species Archae 12; Bacteria 1396; Metazoa 17338; Fungi 3422; Plants …	antitermination NusB domain
BnaA03g47990D	AT4G26400	--	chrA03:24680756 - 24682250	RING/Ubox superfamily protein; FUNCTIONS IN zinc ion binding; INVOLVED IN response to chitin; LOCATED IN endomembrane system; EXPRESSED IN 24 plant structures; EXPRESSED DURING 15 growth stages; CONTAINS InterPro DOMAIN/s Zinc finger, RINGtype (InterProIPR001841), Zinc finger, C3HC4 RINGtype (InterProIPR018957); BEST Arabidopsis thaliana protein match is RING/Ubox superfamily protein (TAIRAT5G563…	RING/U
BnaA03g48000D	AT4G26410	--	chrA03:24682469 - 24684294	Uncharacterised conserved protein UCP022280; FUNCTIONS IN	molecular_function unknown; INVOLVED IN
BnaA03g48020D	AT4G26430	CSN6B	chrA03:24686772 - 24689170	COP9 signalosome subunit 6B (CSN6B); CONTAINS InterPro DOMAIN/s	Mov34/MPN/PAD
BnaA03g48030D	AT4G26440	WRKY34	chrA03:24689242 - 24691086	WRKY DNA	binding protein 34 (WRKY34); CONTAINS InterPro DOMAIN/s
BnaA03g48040D	AT4G26450	--	chrA03:24694394 - 24697380	unknown protein; Has 614 Blast hits to 492 proteins in 137 species	Archae
BnaA03g48050D	AT4G26466	LRE	chrA03:24697930 - 24699006	LORELEI (LRE); BEST Arabidopsis thaliana protein match is	LORELEI
BnaA03g48060D	AT5G56500	CPN60B3	chrA03:24701845 - 24704553	TCP1/cpn60 chaperonin family protein; FUNCTIONS IN ATP binding; INVOLVED IN protein folding, protein refolding, cellular protein metabolic process; LOCATED IN mitochondrion, chloroplast, membrane; EXPRESSED IN 22 plant structures; EXPRESSED DURING 12 growth stages; CONTAINS InterPro DOMAIN/s Chaperonin Cpn60/TCP1 (InterProIPR002423), Chaperonin Cpn60, conserved site (InterProIPR018370), Chaperoni…	RuBisCO subunit binding
BnaA03g48070D	AT4G26470	CML21	chrA03:24705122 - 24706041	Calciumbinding EFhand family protein; FUNCTIONS IN calcium ion binding; INVOLVED IN Nterminal protein myristoylation; LOCATED IN cytoplasm; EXPRESSED IN 8 plant structures; EXPRESSED DURING L mature pollen stage, M germinated pollen stage, 4 anthesis, petal differentiation and expansion stage; CONTAINS InterPro DOMAIN/s EFHand 1, calciumbinding site (InterProIPR018247), EFHAND 2 (InterProIPR01824…	putative calcium
BnaA03g48080D	AT4G26480	--	chrA03:24706100 - 24709084	RNAbinding KH domaincontaining protein; FUNCTIONS IN RNA binding, nucleic acid binding; LOCATED IN cellular_component unknown; EXPRESSED IN 22 plant structures; EXPRESSED DURING 13 growth stages; CONTAINS InterPro DOMAIN/s K Homology (InterProIPR004087); BEST Arabidopsis thaliana protein match is RNAbinding KH domaincontaining protein (TAIRAT5G56140.1); Has 1807 Blast hits to 1807 proteins in 277…	unknown protein [Arabidopsis thaliana]
BnaA03g48090D	AT4G26550	--	chrA03:24710095 - 24711703	Got1/Sft2like vescicle transport protein family; FUNCTIONS IN molecular_function unknown; INVOLVED IN vesiclemediated transport; LOCATED IN cellular_component unknown; EXPRESSED IN 22 plant structures; EXPRESSED DURING 13 growth stages; CONTAINS InterPro DOMAIN/s Vesicle transport protein, Got1/SFT2like (InterProIPR007305), Vesicle transport protein, SFT2like (InterProIPR011691); BEST Arabidopsis…	Got1/Sft2
BnaA03g48100D	AT4G26555	FKBP16-1	chrA03:24711791 - 24713252	FKBPlike peptidylprolyl cistrans isomerase family protein; FUNCTIONS IN FK506 binding, peptidylprolyl cistrans isomerase activity; INVOLVED IN protein folding; LOCATED IN chloroplast; EXPRESSED IN 22 plant structures; EXPRESSED DURING 13 growth stages; CONTAINS InterPro DOMAIN/s Peptidylprolyl cistrans isomerase, FKBPtype (InterProIPR001179); BEST Arabidopsis thaliana protein match is FKBPlike pe…	FKBPlike peptidylprolyl cistrans isomerase family protein [Arabidopsis thaliana] >gi|75306033|sp|Q944B0.1|FK161_ARATH RecName Full=Peptidylprolyl cistrans isomerase FKBP161, chloroplastic; Short=PPIase FKBP161; AltName Full=FK506binding protein 161; Short=AtFKBP161; AltName Full=Immunophilin FKBP161; AltName Full=Rotamase; Flags Precursor >gi|16612240|gb|AAL27493.1|AF439821_1 AT4g26550/M3E9_20 [A…
BnaA03g48110D	AT4G26570	CBL3	chrA03:24713598 - 24715073	calcineurin Blike 3 (CBL3); FUNCTIONS IN calcium ion binding; INVOLVED IN detection of calcium ion; LOCATED IN plasma membrane, vacuole, membrane; EXPRESSED IN 26 plant structures; EXPRESSED DURING 15 growth stages; CONTAINS InterPro DOMAIN/s Calcineurin B protein (InterProIPR015757), Recoverin (InterProIPR001125), EFHAND 2 (InterProIPR018249), Calciumbinding EFhand (InterProIPR002048), EFhandlik…	calcineurin B
BnaA03g48130D	AT4G26590	OPT5	chrA03:24717785 - 24721296	oligopeptide transporter 5 (OPT5); CONTAINS InterPro DOMAIN/s Tetrapeptide transporter, OPT1/isp4 (InterProIPR004648), Oligopeptide transporter OPT superfamily (InterProIPR004813); BEST Arabidopsis thaliana protein match is oligopeptide transporter 1 (TAIRAT5G55930.1); Has 1807 Blast hits to 1807 proteins in 277 species Archae 0; Bacteria 0; Metazoa 736; Fungi 347; Plants 385; Viruses 0; Other Eu…	oligopeptide transporter 5 [Arabidopsis thaliana] >gi|67460976|sp|Q9SUA4.1|OPT5_ARATH RecName
BnaA03g48140D	AT1G48900	SRP-54C	chrA03:24726940 - 24728418	Signal recognition particle, SRP54 subunit protein; FUNCTIONS IN 7S RNA binding, mRNA binding, nucleosidetriphosphatase activity, GTP binding, nucleotide binding; INVOLVED IN SRPdependent cotranslational protein targeting to membrane, signal sequence recognition, SRPdependent cotranslational protein targeting to membrane; LOCATED IN signal recognition particle, signal recognition particle, endopl…	PREDICTED
BnaA03g48150D	AT3G11060	--	chrA03:24730800 - 24731424	unknown protein; FUNCTIONS IN	molecular_function unknown; INVOLVED IN
BnaA03g48160D	AT4G26640	WRKY20	chrA03:24731547 - 24734627	WRKY20; CONTAINS InterPro DOMAIN/s	DNA
BnaA03g48170D	AT5G54690	GAUT12	chrA03:24735655 - 24735913	galacturonosyltransferase 12 (GAUT12); CONTAINS InterPro DOMAIN/s Glycosyl transferase, family 8 (InterProIPR002495); BEST Arabidopsis thaliana protein match is galacturonosyltransferase 13 (TAIRAT3G01040.2); Has 1807 Blast hits to 1807 proteins in 277 species Archae 0; Bacteria 0; Metazoa 736; Fungi 347; Plants 385; Viruses 0; Other Eukaryotes 339 (source NCBI BLink).	GAUT12/IRX8/LGT6 [Arabidopsis lyrata subsp. lyrata] >gi|297311890|gb|EFH42314.1| GAUT12/IRX8/LGT6 [Arabidopsis lyrata subsp. lyrata]
BnaA03g48180D	AT4G26650	--	chrA03:24744614 - 24746539	RNAbinding (RRM/RBD/RNP motifs) family protein; FUNCTIONS IN RNA binding, nucleotide binding, nucleic acid binding; EXPRESSED IN 25 plant structures; EXPRESSED DURING 15 growth stages; CONTAINS InterPro DOMAIN/s RNA recognition motif, RNP1 (InterProIPR000504), Nucleotidebinding, alphabeta plait (InterProIPR012677); BEST Arabidopsis thaliana protein match is RNAbinding (RRM/RBD/RNP motifs) family …	RNA recognition motif
BnaA03g48190D	AT4G26650	--	chrA03:24746715 - 24749164	RNAbinding (RRM/RBD/RNP motifs) family protein; FUNCTIONS IN RNA binding, nucleotide binding, nucleic acid binding; EXPRESSED IN 25 plant structures; EXPRESSED DURING 15 growth stages; CONTAINS InterPro DOMAIN/s RNA recognition motif, RNP1 (InterProIPR000504), Nucleotidebinding, alphabeta plait (InterProIPR012677); BEST Arabidopsis thaliana protein match is RNAbinding (RRM/RBD/RNP motifs) family …	RNA recognition motif
BnaA03g48200D	AT5G56500	CPN60B3	chrA03:24751339 - 24752974	TCP1/cpn60 chaperonin family protein; FUNCTIONS IN ATP binding; INVOLVED IN protein folding, protein refolding, cellular protein metabolic process; LOCATED IN mitochondrion, chloroplast, membrane; EXPRESSED IN 22 plant structures; EXPRESSED DURING 12 growth stages; CONTAINS InterPro DOMAIN/s Chaperonin Cpn60/TCP1 (InterProIPR002423), Chaperonin Cpn60, conserved site (InterProIPR018370), Chaperoni…	RuBisCO subunit binding
BnaA03g48210D	AT4G26690	GDPDL3	chrA03:24756021 - 24759458	SHAVEN 3 (SHV3); FUNCTIONS IN glycerophosphodiester phosphodiesterase activity, kinase activity; INVOLVED IN in 8 processes; LOCATED IN anchored to plasma membrane, plasma membrane, anchored to membrane, planttype cell wall; EXPRESSED IN 28 plant structures; EXPRESSED DURING 13 growth stages; CONTAINS InterPro DOMAIN/s PLClike phosphodiesterase, TIM beta/alphabarrel domain (InterProIPR017946), Gl…	MRH5/SHV3 [Arabidopsis lyrata subsp. lyrata] >gi|297313382|gb|EFH43805.1| MRH5/SHV3 [Arabidopsis lyrata subsp. lyrata]
BnaA04g10170D	AT4G29000	TCX5	chrA04:8987673 - 8988291	Tesmin/TSO1like CXC domaincontaining protein; CONTAINS InterPro DOMAIN/s Tesmin/TSO1like, CXC (InterProIPR005172); BEST Arabidopsis thaliana protein match is Tesmin/TSO1like CXC domaincontaining protein (TAIRAT2G20110.1); Has 1016 Blast hits to 666 proteins in 93 species Archae 0; Bacteria 0; Metazoa 285; Fungi 4; Plants 322; Viruses 0; Other Eukaryotes 405 (source NCBI BLink).	Tesmin/TSO1
BnaA04g10180D	AT1G27070	--	chrA04:8988750 - 8989058	5'	AMP
BnaA04g10190D	AT5G40330	MYB23	chrA04:8997151 - 8999910	myb domain protein 23 (MYB23); CONTAINS InterPro DOMAIN/s SANT, DNAbinding (InterProIPR001005), Homeodomainlike (InterProIPR009057), Myb, DNAbinding (InterProIPR014778), HTH transcriptional regulator, Mybtype, DNAbinding (InterProIPR017930), Homeodomainrelated (InterProIPR012287), Myb transcription factor (InterProIPR015495); BEST Arabidopsis thaliana protein match is myb domain protein 0 (TAIRAT…	transcription factor MYB23 [Arabidopsis thaliana] >gi|75332916|sp|Q96276.1|MYB23_ARATH RecName
BnaA04g10200D	AT3G27880	--	chrA04:9011745 - 9012450	Protein of unknown function (DUF1645); CONTAINS InterPro DOMAIN/s	Protein of unknown function DUF1645 (InterPro
BnaA04g10210D	AT5G40880	ZFWD3	chrA04:9018599 - 9019199	WD40 repeat family protein / zfwd3 protein (ZFWD3); FUNCTIONS IN zinc ion binding, nucleic acid binding; INVOLVED IN Nterminal protein myristoylation; LOCATED IN cellular_component unknown; EXPRESSED IN male gametophyte, pollen tube; EXPRESSED DURING L mature pollen stage, M germinated pollen stage; CONTAINS InterPro DOMAIN/s Zinc finger, CCCHtype (InterProIPR000571), WD40 repeat 2 (InterProIPR01…	WD
BnaA04g10220D	AT5G40880	ZFWD3	chrA04:9019277 - 9021771	WD40 repeat family protein / zfwd3 protein (ZFWD3); FUNCTIONS IN zinc ion binding, nucleic acid binding; INVOLVED IN Nterminal protein myristoylation; LOCATED IN cellular_component unknown; EXPRESSED IN male gametophyte, pollen tube; EXPRESSED DURING L mature pollen stage, M germinated pollen stage; CONTAINS InterPro DOMAIN/s Zinc finger, CCCHtype (InterProIPR000571), WD40 repeat 2 (InterProIPR01…	WD
BnaA04g10230D	AT5G01150	--	chrA04:9023571 - 9025197	Protein of unknown function (DUF674); CONTAINS InterPro DOMAIN/s	Protein of unknown function DUF674 (InterPro
BnaA04g10240D	AT5G40370	GRXC2	chrA04:9027613 - 9029522	Glutaredoxin family protein; FUNCTIONS IN electron carrier activity, arsenate reductase (glutaredoxin) activity, protein disulfide oxidoreductase activity; INVOLVED IN cell redox homeostasis; LOCATED IN plasma membrane, vacuole; EXPRESSED IN 28 plant structures; EXPRESSED DURING 15 growth stages; CONTAINS InterPro DOMAIN/s Glutaredoxin (InterProIPR002109), Thioredoxin fold (InterProIPR012335), Gl…	glutaredoxin
BnaA04g10250D	AT5G40382	--	chrA04:9031405 - 9032258	Cytochrome c oxidase subunit Vc family protein; FUNCTIONS IN cytochromec oxidase activity; INVOLVED IN oxidation reduction; LOCATED IN mitochondrial respiratory chain, endomembrane system; CONTAINS InterPro DOMAIN/s Cytochrome c oxidase subunit Vc (InterProIPR008432); BEST Arabidopsis thaliana protein match is Cytochrome c oxidase subunit Vc family protein (TAIRAT5G61310.4); Has 30201 Blast hits …	putative cytochrome c oxidase subunit 5C
BnaA04g10260D	AT5G40390	RFS5	chrA04:9043551 - 9047080	seed imbibition 1like (SIP1); FUNCTIONS IN hydrolase activity, hydrolyzing Oglycosyl compounds, galactinolsucrose galactosyltransferase activity; INVOLVED IN mannitol biosynthetic process, raffinose family oligosaccharide biosynthetic process, response to water deprivation, sucrose biosynthetic process; LOCATED IN chloroplast; EXPRESSED IN 22 plant structures; EXPRESSED DURING 13 growth stages; C…	putative galactinol
BnaA04g10270D	AT5G40400	--	chrA04:9048159 - 9050022	Pentatricopeptide repeat (PPR) superfamily protein; CONTAINS InterPro DOMAIN/s	Pentatricopeptide repeat (InterPro
BnaA04g10280D	AT5G40440	MKK3	chrA04:9054950 - 9057786	mitogenactivated protein kinase kinase 3 (MKK3); CONTAINS InterPro DOMAIN/s Protein kinase, ATP binding site (InterProIPR017441), Nuclear transport factor 2, Eukaryote (InterProIPR018222), Protein kinase, catalytic domain (InterProIPR000719), Serine/threonineprotein kinase domain (InterProIPR002290), Serine/threonineprotein kinaselike domain (InterProIPR017442), Protein kinaselike domain (InterPr…	mitogen
BnaA04g10290D	AT5G40360	MYB115	chrA04:9076344 - 9077539	myb domain protein 115 (MYB115); CONTAINS InterPro DOMAIN/s SANT, DNAbinding (InterProIPR001005), Homeodomainlike (InterProIPR009057), Myb, DNAbinding (InterProIPR014778), HTH transcriptional regulator, Mybtype, DNAbinding (InterProIPR017930), Homeodomainrelated (InterProIPR012287), Myb transcription factor (InterProIPR015495); BEST Arabidopsis thaliana protein match is myb domain protein 118 (TA…	unnamed protein product [Arabidopsis thaliana]
BnaA04g10300D	AT2G25230	MYB100	chrA04:9087780 - 9088896	myb domain protein 100 (MYB100); CONTAINS InterPro DOMAIN/s SANT, DNAbinding (InterProIPR001005), Homeodomainlike (InterProIPR009057), Myb, DNAbinding (InterProIPR014778), HTH transcriptional regulator, Mybtype, DNAbinding (InterProIPR017930), Homeodomainrelated (InterProIPR012287), Myb transcription factor (InterProIPR015495); BEST Arabidopsis thaliana protein match is myb domain protein 22 (TAI…	putative transcription factor MYB100 [Arabidopsis thaliana] >gi|5823341|gb|AAD53109.1|AF176004_1 putative transcription factor [Arabidopsis thaliana] >gi|4567254|gb|AAD23668.1| putative MYB family transcription factor [Arabidopsis thaliana] >gi|330252580|gb|AEC07674.1| myb domain protein 100 [Arabidopsis thaliana]
BnaA04g10310D	AT5G40460	--	chrA04:9093137 - 9093458	unknown protein; BEST Arabidopsis thaliana protein match is	unknown protein (TAIR
BnaA04g10320D	AT5G40470	--	chrA04:9109517 - 9110963	RNI	like superfamily protein; FUNCTIONS IN
BnaA04g10330D	AT2G44860	--	chrA04:9114843 - 9116224	Ribosomal protein L24e family protein; FUNCTIONS IN structural constituent of ribosome; INVOLVED IN translation, ribosome biogenesis; LOCATED IN ribosome, cytosolic large ribosomal subunit; EXPRESSED IN 22 plant structures; EXPRESSED DURING 13 growth stages; CONTAINS InterPro DOMAIN/s Ribosomal protein L24e (InterProIPR000988), TRASH (InterProIPR011017); BEST Arabidopsis thaliana protein match is…	large subunit ribosomal protein L24e [Arabidopsis thaliana] >gi|145331401|ref|NP_001078059.1| large subunit ribosomal protein L24e [Arabidopsis thaliana] >gi|52783280|sp|O22165.1|RLP24_ARATH RecName
BnaA04g10340D	AT5G40320	--	chrA04:9116686 - 9118247	Cysteine/Histidinerich C1 domain family protein; FUNCTIONS IN zinc ion binding; INVOLVED IN intracellular signaling pathway; LOCATED IN cellular_component unknown; CONTAINS InterPro DOMAIN/s Protein kinase Clike, phorbol ester/diacylglycerol binding (InterProIPR002219), DC1 (InterProIPR004146), Zinc finger, PHDtype (InterProIPR001965), C1like (InterProIPR011424); BEST Arabidopsis thaliana protein…	cysteine/histidine
BnaA04g10350D	AT5G39471	--	chrA04:9122960 - 9124162	Cysteine/Histidinerich C1 domain family protein; FUNCTIONS IN zinc ion binding; INVOLVED IN intracellular signaling pathway; LOCATED IN intracellular; CONTAINS InterPro DOMAIN/s Protein kinase Clike, phorbol ester/diacylglycerol binding (InterProIPR002219), Zinc finger, C2H2like (InterProIPR015880), Zinc finger, RINGtype (InterProIPR001841), DC1 (InterProIPR004146), C1like (InterProIPR011424); BE…	Cysteine/Histidine
BnaA04g10360D	AT5G40490	--	chrA04:9131467 - 9134701	RNAbinding (RRM/RBD/RNP motifs) family protein; FUNCTIONS IN RNA binding, nucleotide binding, nucleic acid binding; INVOLVED IN biological_process unknown; LOCATED IN cellular_component unknown; EXPRESSED IN 21 plant structures; EXPRESSED DURING 13 growth stages; CONTAINS InterPro DOMAIN/s RNA recognition motif, RNP1 (InterProIPR000504), Nucleotidebinding, alphabeta plait (InterProIPR012677); BES…	RNA
BnaA04g10370D	AT5G40510	--	chrA04:9135647 - 9137863	Sucrase/ferredoxinlike family protein; CONTAINS InterPro DOMAIN/s Thioredoxin fold (InterProIPR012335), Sucraseferredoxinlike (InterProIPR009737), Thioredoxinlike fold (InterProIPR012336); BEST Arabidopsis thaliana protein match is Sucrase/ferredoxinlike family protein (TAIRAT3G27570.1); Has 1807 Blast hits to 1807 proteins in 277 species Archae 0; Bacteria 0; Metazoa 736; Fungi 347; Plants 385; …	sucrose cleavage protein
BnaA04g10380D	AT1G14800	--	chrA04:9138466 - 9140569	Nucleic acidbinding, OBfoldlike protein; CONTAINS InterPro DOMAIN/s Nucleic acidbinding, OBfold (InterProIPR012340), Nucleic acidbinding, OBfoldlike (InterProIPR016027); BEST Arabidopsis thaliana protein match is Fbox family protein (TAIRAT2G35280.1); Has 210 Blast hits to 208 proteins in 13 species Archae 0; Bacteria 0; Metazoa 2; Fungi 2; Plants 206; Viruses 0; Other Eukaryotes 0 (source NCBI B…	predicted protein [Arabidopsis lyrata subsp. lyrata] >gi|297324744|gb|EFH55164.1| predicted protein [Arabidopsis lyrata subsp. lyrata]
BnaA04g10410D	AT5G40530	--	chrA04:9145010 - 9146813	S	adenosyl
BnaA04g10420D	AT5G40360	MYB115	chrA04:9152542 - 9153901	myb domain protein 115 (MYB115); CONTAINS InterPro DOMAIN/s SANT, DNAbinding (InterProIPR001005), Homeodomainlike (InterProIPR009057), Myb, DNAbinding (InterProIPR014778), HTH transcriptional regulator, Mybtype, DNAbinding (InterProIPR017930), Homeodomainrelated (InterProIPR012287), Myb transcription factor (InterProIPR015495); BEST Arabidopsis thaliana protein match is myb domain protein 118 (TA…	unnamed protein product [Arabidopsis thaliana]
BnaA04g10430D	AT5G40540	--	chrA04:9159761 - 9161651	Protein kinase superfamily protein; FUNCTIONS IN protein serine/threonine/tyrosine kinase activity, kinase activity; INVOLVED IN protein amino acid phosphorylation; LOCATED IN cellular_component unknown; EXPRESSED IN 13 plant structures; EXPRESSED DURING 7 growth stages; CONTAINS InterPro DOMAIN/s Protein kinase, ATP binding site (InterProIPR017441), Protein kinase, catalytic domain (InterProIPR0…	protein kinase family protein [Arabidopsis thaliana] >gi|9758080|dbj|BAB08524.1| protein kinase ATN1 [Arabidopsis thaliana] >gi|110738180|dbj|BAF01021.1| protein kinase like protein [Arabidopsis thaliana] >gi|332007178|gb|AED94561.1| protein kinase family protein [Arabidopsis thaliana]
BnaA04g10440D	AT3G62440	--	chrA04:9161819 - 9162970	Fbox/RNIlike superfamily protein; CONTAINS InterPro DOMAIN/s Fbox domain, Skp2like (InterProIPR022364), FBDlike (InterProIPR006566), Leucinerich repeat 2 (InterProIPR013101); BEST Arabidopsis thaliana protein match is Fbox/RNIlike superfamily protein (TAIRAT5G15620.1); Has 1659 Blast hits to 1619 proteins in 24 species Archae 0; Bacteria 0; Metazoa 2; Fungi 0; Plants 1657; Viruses 0; Other Eukary…	F
BnaA04g10450D	AT5G40600	-	chrA04:9168202 - 9171809	unknown protein; FUNCTIONS IN	molecular_function unknown; LOCATED IN
BnaA04g10460D	AT5G40610	DHAPRD	chrA04:9171900 - 9173958	NADdependent glycerol3phosphate dehydrogenase family protein; FUNCTIONS IN in 9 functions; INVOLVED IN oxidation reduction, glycerol3phosphate metabolic process, glycerol3phosphate catabolic process, carbohydrate metabolic process, metabolic process; LOCATED IN chloroplast, glycerol3phosphate dehydrogenase complex, cytoplasm; EXPRESSED IN 24 plant structures; EXPRESSED DURING 15 growth stages; CO…	putative dihydroxyacetone 3
BnaA07g00140D	AT1G49320	ATUSPL1	chrA07:136262 - 140175	unknown seed protein like 1 (USPL1); CONTAINS InterPro DOMAIN/s	BURP (InterPro
BnaA07g00150D	AT2G20270	GRXS12	chrA07:172207 - 173454	Thioredoxin superfamily protein; FUNCTIONS IN electron carrier activity, arsenate reductase (glutaredoxin) activity, protein disulfide oxidoreductase activity; INVOLVED IN cell redox homeostasis; LOCATED IN chloroplast, chloroplast stroma; EXPRESSED IN 24 plant structures; EXPRESSED DURING 13 growth stages; CONTAINS InterPro DOMAIN/s Glutaredoxin (InterProIPR002109), Glutaredoxin subgroup (InterP…	monothiol glutaredoxinS12 [Arabidopsis thaliana] >gi|119370630|sp|Q8LBS4.2|GRS12_ARATH RecName Full=Monothiol glutaredoxinS12, chloroplastic; Short=AtGrxS12; Flags Precursor >gi|4512708|gb|AAD21761.1| putative glutaredoxin [Arabidopsis thaliana] >gi|20453151|gb|AAM19817.1| At2g20270/F11A3.18 [Arabidopsis thaliana] >gi|21689617|gb|AAM67430.1| At2g20270/F11A3.18 [Arabidopsis thaliana] >gi|330251893…
BnaA07g00160D	AT2G20280	--	chrA07:173749 - 175981	Zinc finger Cx8Cx5Cx3H type family protein; FUNCTIONS IN zinc ion binding, nucleic acid binding; INVOLVED IN biological_process unknown; LOCATED IN cellular_component unknown; EXPRESSED IN 22 plant structures; EXPRESSED DURING 13 growth stages; CONTAINS InterPro DOMAIN/s Zinc finger, CCCHtype (InterProIPR000571); Has 6263 Blast hits to 4194 proteins in 354 species Archae 14; Bacteria 176; Metazoa…	zinc finger (CCCH
BnaA07g00170D	AT2G20290	XI-G	chrA07:176938 - 192556	myosinlike protein XIG (XIG); FUNCTIONS IN motor activity; INVOLVED IN actin filamentbased movement; LOCATED IN endomembrane system, myosin complex; EXPRESSED IN 23 plant structures; EXPRESSED DURING 13 growth stages; CONTAINS InterPro DOMAIN/s Dil domain (InterProIPR018444), Dilute (InterProIPR002710), Myosin, Nterminal, SH3like (InterProIPR004009), Myosin head, motor domain (InterProIPR001609),…	myosin
BnaA07g00180D	AT2G20300	ALE2	chrA07:195568 - 199114	Abnormal Leaf Shape 2 (ALE2); FUNCTIONS IN kinase activity; INVOLVED IN shoot development, organ formation, protoderm histogenesis, cuticle development; LOCATED IN plasma membrane; EXPRESSED IN 15 plant structures; EXPRESSED DURING 6 growth stages; CONTAINS InterPro DOMAIN/s Protein kinase, ATP binding site (InterProIPR017441), Protein kinase, catalytic domain (InterProIPR000719), Serinethreonine…	receptor
BnaA07g00190D	AT2G20310	RIN13	chrA07:199278 - 202056	RPM1 interacting protein 13 (RIN13); BEST Arabidopsis thaliana protein match is	unknown protein (TAIR
BnaA07g00200D	AT2G20320	--	chrA07:204101 - 209217	DENN (AEX3) domaincontaining protein; CONTAINS InterPro DOMAIN/s uDENN (InterProIPR005113), dDENN (InterProIPR005112), DENN (InterProIPR001194); BEST Arabidopsis thaliana protein match is DENN (AEX3) domaincontaining protein (TAIRAT5G35560.1); Has 1567 Blast hits to 1546 proteins in 147 species Archae 0; Bacteria 2; Metazoa 1072; Fungi 78; Plants 117; Viruses 0; Other Eukaryotes 298 (source NCBI …	DENN (AEX
BnaA07g00210D	AT2G20330	--	chrA07:209857 - 212618	Transducin/WD40 repeatlike superfamily protein; FUNCTIONS IN nucleotide binding; INVOLVED IN biological_process unknown; LOCATED IN CUL4 RING ubiquitin ligase complex; EXPRESSED IN 25 plant structures; EXPRESSED DURING 15 growth stages; CONTAINS InterPro DOMAIN/s WD40 repeat 2 (InterProIPR019782), WD40 repeat, conserved site (InterProIPR019775), WD40 repeat (InterProIPR001680), Gprotein beta WD40…	transducin family protein [Arabidopsis lyrata subsp. lyrata] >gi|297332114|gb|EFH62533.1| transducin family protein [Arabidopsis lyrata subsp. lyrata]
BnaA07g00220D	AT2G20340	ELI5	chrA07:219720 - 224501	Pyridoxal phosphate (PLP)dependent transferases superfamily protein; FUNCTIONS IN pyridoxal phosphate binding, carboxylyase activity, catalytic activity, tyrosine decarboxylase activity; INVOLVED IN response to wounding, cellular amino acid metabolic process; LOCATED IN cellular_component unknown; EXPRESSED IN 22 plant structures; EXPRESSED DURING 13 growth stages; CONTAINS InterPro DOMAIN/s Arom…	putative tyrosine decarboxylase [Arabidopsis thaliana]
BnaA07g00230D	AT5G09810	ACT7	chrA07:226798 - 228732	actin 7 (ACT7); FUNCTIONS IN protein binding, structural constituent of cytoskeleton; INVOLVED IN in 9 processes; LOCATED IN mitochondrion, nucleolus, cell wall, cytoskeleton, plasma membrane; EXPRESSED IN 29 plant structures; EXPRESSED DURING 14 growth stages; CONTAINS InterPro DOMAIN/s Actin, conserved site (InterProIPR004001), Actin/actinlike (InterProIPR004000), Actin/actinlike conserved site…	actin 7 [Brassica rapa subsp. pekinensis]
BnaA07g00240D	AT2G20340	ELI5	chrA07:236484 - 239481	Pyridoxal phosphate (PLP)dependent transferases superfamily protein; FUNCTIONS IN pyridoxal phosphate binding, carboxylyase activity, catalytic activity, tyrosine decarboxylase activity; INVOLVED IN response to wounding, cellular amino acid metabolic process; LOCATED IN cellular_component unknown; EXPRESSED IN 22 plant structures; EXPRESSED DURING 13 growth stages; CONTAINS InterPro DOMAIN/s Arom…	tyrosine decarboxylase 1 [Arabidopsis thaliana] >gi|68053310|sp|Q8RY79.1|TYDC1_ARATH RecName
BnaA07g00250D	AT2G20360	--	chrA07:239708 - 242741	NAD(P)binding Rossmannfold superfamily protein; FUNCTIONS IN coenzyme binding, binding, catalytic activity; INVOLVED IN response to salt stress; LOCATED IN mitochondrion, respiratory chain complex I, membrane; EXPRESSED IN 27 plant structures; EXPRESSED DURING 16 growth stages; CONTAINS InterPro DOMAIN/s NADdependent epimerase/dehydratase (InterProIPR001509), NAD(P)binding domain (InterProIPR0160…	catalytic/ coenzyme binding protein [Arabidopsis lyrata subsp. lyrata] >gi|297330036|gb|EFH60455.1| catalytic/ coenzyme binding protein [Arabidopsis lyrata subsp. lyrata]
BnaA07g00260D	AT2G20370	KAM1	chrA07:244733 - 246714	MURUS 3 (MUR3); CONTAINS InterPro DOMAIN/s	Exostosin
BnaA07g00270D	AT2G20390	--	chrA07:246921 - 248646	unknown protein; Has 50 Blast hits to 50 proteins in 18 species	Archae
BnaA07g00280D	AT2G20400	--	chrA07:257200 - 258856	myblike HTH transcriptional regulator family protein; CONTAINS InterPro DOMAIN/s Homeodomainlike (InterProIPR009057), Myb, DNAbinding (InterProIPR014778), Myblike DNAbinding domain, SHAQKYF class (InterProIPR006447), HTH transcriptional regulator, Mybtype, DNAbinding (InterProIPR017930), Homeodomainrelated (InterProIPR012287); BEST Arabidopsis thaliana protein match is phosphate starvation respon…	myb
BnaA07g00290D	AT2G20420	--	chrA07:259214 - 264181	ATP citrate lyase (ACL) family protein; FUNCTIONS IN succinateCoA ligase (GDPforming) activity, copper ion binding, ATP binding; INVOLVED IN response to cadmium ion, metabolic process; LOCATED IN mitochondrion; EXPRESSED IN 26 plant structures; EXPRESSED DURING 16 growth stages; CONTAINS InterPro DOMAIN/s SuccinylCoA synthetase, beta subunit (InterProIPR005809), SuccinylCoA synthetase, beta subun…	SuccinylCoA ligase [GDPforming] subunit beta [Arabidopsis thaliana] >gi|21264030|sp|O82662.1|SUCB_ARATH RecName Full=SuccinylCoA ligase [ADPforming] subunit beta, mitochondrial; AltName Full=SuccinylCoA synthetase beta chain; Short=SCSbeta; Flags Precursor >gi|3660469|emb|CAA05024.1| succinylCoAligase beta subunit [Arabidopsis thaliana] >gi|20197853|gb|AAM15283.1| succinylCoA ligase beta subunit …
BnaA07g00300D	AT2G20430	RIC6	chrA07:272694 - 273601	ROP	interactive CRIB motif
BnaA07g00310D	AT2G20440	--	chrA07:278805 - 282240	Ypt/RabGAP domain of gyp1p superfamily protein; FUNCTIONS IN RAB GTPase activator activity; INVOLVED IN regulation of Rab GTPase activity; LOCATED IN intracellular; EXPRESSED IN male gametophyte, pollen tube; EXPRESSED DURING L mature pollen stage, M germinated pollen stage; CONTAINS InterPro DOMAIN/s RabGAP/TBC (InterProIPR000195); BEST Arabidopsis thaliana protein match is Ypt/RabGAP domain of …	RabGAP/TBC domain
BnaA07g00320D	AT2G20470	--	chrA07:282345 - 285480	AGC (cAMPdependent, cGMPdependent and protein kinase C) kinase family protein; FUNCTIONS IN kinase activity; INVOLVED IN protein amino acid phosphorylation; EXPRESSED IN male gametophyte; EXPRESSED DURING M germinated pollen stage; CONTAINS InterPro DOMAIN/s Protein kinase, ATP binding site (InterProIPR017441), Serine/threonineprotein kinase domain (InterProIPR002290), Serine/threonineprotein kin…	AGC (cAMPdependent, cGMPdependent and protein kinase C) kinase family protein [Arabidopsis thaliana] >gi|91806214|gb|ABE65835.1| protein kinase [Arabidopsis thaliana] >gi|330251919|gb|AEC07013.1| AGC (cAMPdependent, cGMPdependent and protein kinase C) kinase family protein [Arabidopsis thaliana]
BnaA07g00330D	AT2G20480	--	chrA07:285828 - 287083	unknown protein; Has 19 Blast hits to 19 proteins in 10 species	Archae
BnaA07g00340D	AT2G20490	NOP10	chrA07:287187 - 288096	NOP10; FUNCTIONS IN RNA binding; INVOLVED IN polar nucleus fusion; LOCATED IN nucleolus, Cajal body; EXPRESSED IN 22 plant structures; EXPRESSED DURING 13 growth stages; CONTAINS InterPro DOMAIN/s H/ACA ribonucleoprotein complex, subunit Nop10 (InterProIPR007264); Has 388 Blast hits to 388 proteins in 192 species Archae 0; Bacteria 0; Metazoa 133; Fungi 120; Plants 61; Viruses 0; Other Eukaryotes…	EDA27/NOP10 [Arabidopsis lyrata subsp. lyrata] >gi|297330045|gb|EFH60464.1| EDA27/NOP10 [Arabidopsis lyrata subsp. lyrata]
BnaA07g00350D	AT1G27410	AT1G27420/F17L21.21	chrA07:288158 - 289694	DNA repair metallo	beta
BnaA07g00360D	AT2G20495	--	chrA07:289901 - 291366	CONTAINS InterPro DOMAIN/s	Serine
BnaA07g00370D	AT2G36070	TIM44-2	chrA07:297793 - 300818	translocase inner membrane subunit 442 (TIM442); FUNCTIONS IN proteintransmembrane transporting ATPase activity; INVOLVED IN protein targeting to mitochondrion; LOCATED IN mitochondrion, mitochondrial inner membrane, mitochondrial inner membrane presequence translocase complex; EXPRESSED IN 23 plant structures; EXPRESSED DURING 13 growth stages; CONTAINS InterPro DOMAIN/s Mitochondrial inner memb…	attim44
BnaA07g00380D	AT5G48920	TED7	chrA07:302093 - 302823	tracheary element differentiation	related 7 (TED7); BEST Arabidopsis thaliana protein match is
BnaA07g00390D	AT5G48930	HST	chrA07:303061 - 305066	hydroxycinnamoyl	CoA shikimate/quinate hydroxycinnamoyl transferase (HCT); CONTAINS InterPro DOMAIN/s
BnaC01g36330D	AT3G15210	ERF4	chrC01:35650908 - 35651657	ethylene responsive element binding factor 4 (ERF4); CONTAINS InterPro DOMAIN/s DNAbinding, integrasetype (InterProIPR016177), Pathogenesisrelated transcriptional factor/ERF, DNAbinding (InterProIPR001471); BEST Arabidopsis thaliana protein match is ethylene response factor 8 (TAIRAT1G53170.1); Has 6170 Blast hits to 5786 proteins in 253 species Archae 0; Bacteria 0; Metazoa 0; Fungi 0; Plants 61…	ATERF
BnaC01g36340D	AT3G15190	RPS20	chrC01:35655387 - 35656419	chloroplast 30S ribosomal protein S20, putative; FUNCTIONS IN structural constituent of ribosome, RNA binding; INVOLVED IN translation, ribosome biogenesis; LOCATED IN ribosome, chloroplast stroma, chloroplast, membrane; EXPRESSED IN 22 plant structures; EXPRESSED DURING 13 growth stages; CONTAINS InterPro DOMAIN/s Ribosomal protein S20 (InterProIPR002583); Has 3989 Blast hits to 3989 proteins in…	30S ribosomal protein S20 [Arabidopsis thaliana] >gi|75308015|sp|Q9ASV6.1|RR20_ARATH RecName Full=30S ribosomal protein S20, chloroplastic; Flags Precursor >gi|188036221|pdb|3BBN|T Chain T, Homology Model For The Spinach Chloroplast 30s Subunit Fitted To 9.4a CryoEm Map Of The 70s Chlororibosome. >gi|13605653|gb|AAK32820.1|AF361807_1 AT3g15190/F4B12_10 [Arabidopsis thaliana] >gi|13899121|gb|AAK48…
BnaC01g36350D	AT3G15170	NAC054	chrC01:35656944 - 35658537	CUP	SHAPED COTYLEDON1 (CUC1); CONTAINS InterPro DOMAIN/s
BnaC01g36370D	AT3G15095	--	chrC01:35667336 - 35668845	unknown protein; FUNCTIONS IN	molecular_function unknown; INVOLVED IN
BnaC01g36390D	AT3G04660	--	chrC01:35689014 - 35690795	Fbox and associated interaction domainscontaining protein; CONTAINS InterPro DOMAIN/s Fbox domain, cyclinlike (InterProIPR001810), Fbox domain, Skp2like (InterProIPR022364), Fbox associated domain, type 3 (InterProIPR013187), Fbox associated interaction domain (InterProIPR017451); BEST Arabidopsis thaliana protein match is Fbox associated ubiquitination effector family protein (TAIRAT2G13630.1); …	F
BnaC01g36400D	AT3G15060	RABA1G	chrC01:35691379 - 35692314	RAB GTPase homolog A1G (RABA1g); FUNCTIONS IN GTP binding; INVOLVED IN response to cadmium ion; EXPRESSED IN 24 plant structures; EXPRESSED DURING 15 growth stages; CONTAINS InterPro DOMAIN/s Ras GTPase (InterProIPR001806), Small GTPbinding protein (InterProIPR005225), Small GTPase (InterProIPR020851), Ras (InterProIPR013753), Ras small GTPase, Rab type (InterProIPR003579), Rab11related (InterPro…	RAB GTPase
BnaC01g36410D	AT3G15050	IQD10	chrC01:35692894 - 35693838	IQdomain 10 (IQD10); FUNCTIONS IN calmodulin binding; INVOLVED IN biological_process unknown; LOCATED IN chloroplast; EXPRESSED IN 9 plant structures; EXPRESSED DURING 4 anthesis, petal differentiation and expansion stage; CONTAINS InterPro DOMAIN/s IQ calmodulinbinding region (InterProIPR000048); BEST Arabidopsis thaliana protein match is IQdomain 9 (TAIRAT2G33990.1); Has 647 Blast hits to 643 p…	IQ
BnaC01g36420D	AT3G15040	--	chrC01:35694093 - 35695395	Protein of unknown function, DUF584; CONTAINS InterPro DOMAIN/s Protein of unknown function DUF584 (InterProIPR007608); BEST Arabidopsis thaliana protein match is Protein of unknown function, DUF584 (TAIRAT4G21970.1); Has 2569 Blast hits to 543 proteins in 84 species Archae 0; Bacteria 28; Metazoa 187; Fungi 69; Plants 343; Viruses 0; Other Eukaryotes 1942 (source NCBI BLink).	unknown [Arabidopsis thaliana]
BnaC01g36430D	AT3G15030	TCP4	chrC01:35696597 - 35697693	TCP family transcription factor 4 (TCP4); FUNCTIONS IN DNA binding, sequencespecific DNA binding transcription factor activity; INVOLVED IN in 6 processes; LOCATED IN cellular_component unknown; EXPRESSED IN 19 plant structures; EXPRESSED DURING 12 growth stages; CONTAINS InterPro DOMAIN/s Transcription factor, TCP (InterProIPR005333), Transcription factor TCP subgroup (InterProIPR017887); BEST A…	unnamed protein product [Arabidopsis thaliana]
BnaC01g36450D	AT3G15000	MORF8	chrC01:35709081 - 35713827	cobalt ion binding; FUNCTIONS IN cobalt ion binding; LOCATED IN mitochondrion; EXPRESSED IN 23 plant structures; EXPRESSED DURING 13 growth stages; BEST Arabidopsis thaliana protein match is plastid developmental protein DAG, putative (TAIRAT3G06790.2); Has 57621 Blast hits to 29750 proteins in 1231 species Archae 14; Bacteria 7130; Metazoa 26978; Fungi 8402; Plants 8184; Viruses 944; Other Eukar…	PREDICTED uncharacterized protein At3g15000, mitochondriallike, partial [Cucumis sativus]
BnaC01g36460D	AT3G14950	TTL2	chrC01:35742394 - 35745260	tetratricopetiderepeat thioredoxinlike 2 (TTL2); FUNCTIONS IN binding; INVOLVED IN cell redox homeostasis; LOCATED IN cellular_component unknown; EXPRESSED IN petal, leaf whorl, flower; EXPRESSED DURING 4 anthesis, petal differentiation and expansion stage; CONTAINS InterPro DOMAIN/s Molecular chaperone, heat shock protein, Hsp40, DnaJ (InterProIPR015609), Thioredoxin fold (InterProIPR012335), Te…	RecName
BnaC01g36470D	AT3G14940	PPC3	chrC01:35745920 - 35746049	phosphoenolpyruvate carboxylase 3 (PPC3); FUNCTIONS IN phosphoenolpyruvate carboxylase activity; INVOLVED IN response to salt stress, tricarboxylic acid cycle; LOCATED IN cytosol; EXPRESSED IN 23 plant structures; EXPRESSED DURING 13 growth stages; CONTAINS InterPro DOMAIN/s Pyruvate/Phosphoenolpyruvate kinase, catalytic core (InterProIPR015813), Phosphoenolpyruvate carboxylase, active site (Inte…	ATPPC3 [Arabidopsis lyrata subsp. lyrata] >gi|297328744|gb|EFH59163.1| ATPPC3 [Arabidopsis lyrata subsp. lyrata]
BnaC01g36480D	AT3G14940	PPC3	chrC01:35746108 - 35748023	phosphoenolpyruvate carboxylase 3 (PPC3); FUNCTIONS IN phosphoenolpyruvate carboxylase activity; INVOLVED IN response to salt stress, tricarboxylic acid cycle; LOCATED IN cytosol; EXPRESSED IN 23 plant structures; EXPRESSED DURING 13 growth stages; CONTAINS InterPro DOMAIN/s Pyruvate/Phosphoenolpyruvate kinase, catalytic core (InterProIPR015813), Phosphoenolpyruvate carboxylase, active site (Inte…	ATPPC3 [Arabidopsis lyrata subsp. lyrata] >gi|297328744|gb|EFH59163.1| ATPPC3 [Arabidopsis lyrata subsp. lyrata]
BnaC01g36490D	AT3G14940	PPC3	chrC01:35748145 - 35749311	phosphoenolpyruvate carboxylase 3 (PPC3); FUNCTIONS IN phosphoenolpyruvate carboxylase activity; INVOLVED IN response to salt stress, tricarboxylic acid cycle; LOCATED IN cytosol; EXPRESSED IN 23 plant structures; EXPRESSED DURING 13 growth stages; CONTAINS InterPro DOMAIN/s Pyruvate/Phosphoenolpyruvate kinase, catalytic core (InterProIPR015813), Phosphoenolpyruvate carboxylase, active site (Inte…	ATPPC3 [Arabidopsis lyrata subsp. lyrata] >gi|297328744|gb|EFH59163.1| ATPPC3 [Arabidopsis lyrata subsp. lyrata]
BnaC01g36500D	AT3G14920	--	chrC01:35759361 - 35761116	PeptideN4(Nacetylbetaglucosaminyl)asparagine amidase A protein; INVOLVED IN biological_process unknown; LOCATED IN plasma membrane, vacuole, planttype cell wall; EXPRESSED IN 23 plant structures; EXPRESSED DURING 13 growth stages; CONTAINS InterPro DOMAIN/s PeptideN4(Nacetylbetaglucosaminyl)asparagine amidase A (InterProIPR021102); BEST Arabidopsis thaliana protein match is PeptideN4(Nacetylbetag…	peptide
BnaC01g36510D	AT3G03720	CAT4	chrC01:35762155 - 35763230	cationic amino acid transporter 4 (CAT4); FUNCTIONS IN cationic amino acid transmembrane transporter activity; INVOLVED IN transport, amino acid transport, transmembrane transport; LOCATED IN plasma membrane, vacuole; EXPRESSED IN 24 plant structures; EXPRESSED DURING 15 growth stages; CONTAINS InterPro DOMAIN/s Cationic amino acid transporter (InterProIPR015606), Protein of unknown function DUF2…	cationic amino acid transporter 4 [Arabidopsis thaliana] >gi|332640454|gb|AEE73975.1| cationic amino acid transporter 4 [Arabidopsis thaliana]
BnaC01g36520D	AT5G64920	CIP8	chrC01:35766922 - 35767630	COP1interacting protein 8 (CIP8); CONTAINS InterPro DOMAIN/s Zinc finger, RINGtype (InterProIPR001841), Zinc finger, C3HC4 RINGtype (InterProIPR018957); BEST Arabidopsis thaliana protein match is RING/Ubox superfamily protein (TAIRAT5G01980.1); Has 1807 Blast hits to 1807 proteins in 277 species Archae 0; Bacteria 0; Metazoa 736; Fungi 347; Plants 385; Viruses 0; Other Eukaryotes 339 (source NCBI…	COP1
BnaC01g36540D	AT3G14860	--	chrC01:35768299 - 35768695	NHL domaincontaining protein; CONTAINS InterPro DOMAIN/s NHL repeat (InterProIPR001258), Sixbladed betapropeller, TolBlike (InterProIPR011042); BEST Arabidopsis thaliana protein match is NHL domaincontaining protein (TAIRAT1G70280.2); Has 35333 Blast hits to 34131 proteins in 2444 species Archae 798; Bacteria 22429; Metazoa 974; Fungi 991; Plants 531; Viruses 0; Other Eukaryotes 9610 (source NCBI…	NHL domain
BnaC01g36550D	AT3G14850	TBL41	chrC01:35769448 - 35771474	TRICHOME BIREFRINGENCELIKE 41 (TBL41); INVOLVED IN biological_process unknown; LOCATED IN endomembrane system; EXPRESSED IN 11 plant structures; EXPRESSED DURING 4 anthesis, C globular stage, petal differentiation and expansion stage; CONTAINS InterPro DOMAIN/s Protein of unknown function DUF231, plant (InterProIPR004253); BEST Arabidopsis thaliana protein match is TRICHOME BIREFRINGENCELIKE 38 (…	protein trichome birefringence
BnaC01g36560D	AT3G14840	LRR-RLK	chrC01:35781175 - 35781965	Leucinerich repeat transmembrane protein kinase; FUNCTIONS IN protein serine/threonine kinase activity, protein kinase activity, ATP binding; INVOLVED IN protein amino acid phosphorylation; LOCATED IN plasma membrane; EXPRESSED IN 25 plant structures; EXPRESSED DURING 14 growth stages; CONTAINS InterPro DOMAIN/s Malectin/receptorlike protein kinase (InterProIPR021720), Protein kinase, catalytic d…	leucine
BnaC01g36570D	AT3G14840	LRR-RLK	chrC01:35787779 - 35794201	Leucinerich repeat transmembrane protein kinase; FUNCTIONS IN protein serine/threonine kinase activity, protein kinase activity, ATP binding; INVOLVED IN protein amino acid phosphorylation; LOCATED IN plasma membrane; EXPRESSED IN 25 plant structures; EXPRESSED DURING 14 growth stages; CONTAINS InterPro DOMAIN/s Malectin/receptorlike protein kinase (InterProIPR021720), Protein kinase, catalytic d…	leucine
BnaC01g36580D	AT3G14820	--	chrC01:35808731 - 35810240	GDSLlike Lipase/Acylhydrolase superfamily protein; FUNCTIONS IN lipase activity, hydrolase activity, acting on ester bonds, carboxylesterase activity; INVOLVED IN lipid metabolic process; LOCATED IN endomembrane system; EXPRESSED IN central cell; CONTAINS InterPro DOMAIN/s Lipase, GDSL, active site (InterProIPR008265), Lipase, GDSL (InterProIPR001087); BEST Arabidopsis thaliana protein match is G…	GDSL esterase/lipase [Arabidopsis thaliana] >gi|229890092|sp|Q9LH73.2|GDL52_ARATH RecName
BnaC01g36590D	AT3G14790	RHM3	chrC01:35815519 - 35817508	rhamnose biosynthesis 3 (RHM3); CONTAINS InterPro DOMAIN/s NADdependent epimerase/dehydratase (InterProIPR001509), NAD(P)binding domain (InterProIPR016040), dTDP4dehydrorhamnose reductase (InterProIPR005913); BEST Arabidopsis thaliana protein match is NADdependent epimerase/dehydratase family protein (TAIRAT1G53500.1); Has 53605 Blast hits to 53390 proteins in 3033 species Archae 947; Bacteria 30…	rhamnose biosynthetic enzyme 3 [Arabidopsis thaliana] >gi|62901052|sp|Q9LH76.1|RHM3_ARATH RecName
BnaC01g36600D	AT3G14770	SWEET2	chrC01:35824410 - 35828099	Nodulin MtN3 family protein; FUNCTIONS IN molecular_function unknown; INVOLVED IN biological_process unknown; LOCATED IN endomembrane system, integral to membrane, membrane; EXPRESSED IN 22 plant structures; EXPRESSED DURING 13 growth stages; CONTAINS InterPro DOMAIN/s MtN3/salivarelated transmembrane protein, conserved region (InterProIPR018169), RAG1activating protein 1 homologue (InterProIPR01…	bidirectional sugar transporter SWEET2 [Arabidopsis thaliana] >gi|75273203|sp|Q9LH79.1|SWET2_ARATH RecName
BnaC01g36610D	AT3G14760	--	chrC01:35828515 - 35829112	unknown protein; FUNCTIONS IN molecular_function unknown; INVOLVED IN biological_process unknown; LOCATED IN endomembrane system; EXPRESSED IN 6 plant structures; EXPRESSED DURING LP.04 four leaves visible, LP.02 two leaves visible; Has 63 Blast hits to 63 proteins in 13 species Archae 0; Bacteria 0; Metazoa 0; Fungi 0; Plants 63; Viruses 0; Other Eukaryotes 0 (source NCBI BLink).	uncharacterized protein [Arabidopsis thaliana] >gi|11994586|dbj|BAB02641.1| unnamed protein product [Arabidopsis thaliana] >gi|18252977|gb|AAL62415.1| unknown protein [Arabidopsis thaliana] >gi|21389655|gb|AAM48026.1| unknown protein [Arabidopsis thaliana] >gi|332642043|gb|AEE75564.1| uncharacterized protein AT3G14760 [Arabidopsis thaliana]
BnaC01g36620D	AT3G14740	--	chrC01:35830521 - 35831574	RING/FYVE/PHD zinc finger superfamily protein; FUNCTIONS IN zinc ion binding; EXPRESSED IN 21 plant structures; EXPRESSED DURING 13 growth stages; CONTAINS InterPro DOMAIN/s Zinc finger, PHDtype (InterProIPR001965), Zinc finger, FYVE/PHDtype (InterProIPR011011), Zinc finger, PHDfinger (InterProIPR019787); BEST Arabidopsis thaliana protein match is homologue of trithorax (TAIRAT2G31650.1); Has 353…	predicted protein [Arabidopsis lyrata subsp. lyrata] >gi|297330893|gb|EFH61312.1| predicted protein [Arabidopsis lyrata subsp. lyrata]
BnaC01g36630D	AT3G14730	PCMP-E31	chrC01:35833089 - 35833754	Pentatricopeptide repeat (PPR) superfamily protein; CONTAINS InterPro DOMAIN/s	Pentatricopeptide repeat (InterPro
BnaC01g36650D	AT3G14730	PCMP-E31	chrC01:35834148 - 35835063	Pentatricopeptide repeat (PPR) superfamily protein; CONTAINS InterPro DOMAIN/s	Pentatricopeptide repeat (InterPro
BnaC01g36660D	AT3G14720	MPK19	chrC01:35835212 - 35838433	MAP kinase 19 (MPK19); CONTAINS InterPro DOMAIN/s Protein kinase, ATP binding site (InterProIPR017441), MAP kinase, conserved site (InterProIPR003527), Protein kinase, catalytic domain (InterProIPR000719), Serine/threonineprotein kinase domain (InterProIPR002290), Serine/threonineprotein kinaselike domain (InterProIPR017442), Protein kinaselike domain (InterProIPR011009); BEST Arabidopsis thalian…	mitogen
BnaC02g15320D	AT4G09490	--	chrC02:10835241 - 10835695	Polynucleotidyl transferase, ribonuclease Hlike superfamily protein; FUNCTIONS IN ribonuclease H activity, nucleic acid binding; INVOLVED IN biological_process unknown; LOCATED IN endomembrane system; EXPRESSED IN 21 plant structures; EXPRESSED DURING 13 growth stages; CONTAINS InterPro DOMAIN/s Polynucleotidyl transferase, ribonuclease H fold (InterProIPR012337), Ribonuclease H (InterProIPR00215…	putative non
BnaC02g15330D	AT5G56690	--	chrC02:10836644 - 10838476	FBD, Fbox and Leucine Rich Repeat domains containing protein; CONTAINS InterPro DOMAIN/s FBD (InterProIPR013596), Fbox domain, cyclinlike (InterProIPR001810), Fbox domain, Skp2like (InterProIPR022364), Leucinerich repeat 2 (InterProIPR013101); BEST Arabidopsis thaliana protein match is FBD / Leucine Rich Repeat domains containing protein (TAIRAT5G56700.1); Has 2091 Blast hits to 2055 proteins in …	RecName
BnaC02g15340D	AT4G25570	CYB561A	chrC02:10839200 - 10840249	ACYB2; FUNCTIONS IN carbonmonoxide oxygenase activity; LOCATED IN integral to membrane, chloroplast, vacuole; EXPRESSED IN 23 plant structures; EXPRESSED DURING 13 growth stages; CONTAINS InterPro DOMAIN/s Cytochrome b561, eukaryote (InterProIPR004877), Cytochrome b561/ferric reductase transmembrane (InterProIPR006593); BEST Arabidopsis thaliana protein match is cytochrome B5611 (TAIRAT5G38630.1)…	cytochrome b561 [Arabidopsis thaliana]
BnaC02g15350D	AT5G52140	--	chrC02:10842214 - 10844633	RING/Ubox superfamily protein; FUNCTIONS IN zinc ion binding; INVOLVED IN biological_process unknown; LOCATED IN cellular_component unknown; CONTAINS InterPro DOMAIN/s Zinc finger, RINGtype (InterProIPR001841), Zinc finger, C3HC4 RINGtype (InterProIPR018957); BEST Arabidopsis thaliana protein match is RING/Ubox superfamily protein (TAIRAT5G52150.1); Has 8903 Blast hits to 8879 proteins in 265 spe…	protein binding protein [Arabidopsis lyrata subsp. lyrata] >gi|297311731|gb|EFH42155.1| protein binding protein [Arabidopsis lyrata subsp. lyrata]
BnaC02g15360D	AT5G52140	--	chrC02:10846541 - 10848480	RING/Ubox superfamily protein; FUNCTIONS IN zinc ion binding; INVOLVED IN biological_process unknown; LOCATED IN cellular_component unknown; CONTAINS InterPro DOMAIN/s Zinc finger, RINGtype (InterProIPR001841), Zinc finger, C3HC4 RINGtype (InterProIPR018957); BEST Arabidopsis thaliana protein match is RING/Ubox superfamily protein (TAIRAT5G52150.1); Has 8903 Blast hits to 8879 proteins in 265 spe…	RING/U
BnaC02g15380D	AT4G33100	--	chrC02:10864031 - 10866036	CONTAINS InterPro DOMAIN/s	Mitochondrial distribution/morphology family 35/apoptosis (InterPro
BnaC02g15390D	AT5G52050	--	chrC02:10933984 - 10935511	MATE efflux family protein; FUNCTIONS IN antiporter activity, drug transmembrane transporter activity; INVOLVED IN drug transmembrane transport, transmembrane transport; LOCATED IN membrane; EXPRESSED IN 7 plant structures; EXPRESSED DURING 7 growth stages; CONTAINS InterPro DOMAIN/s Multi antimicrobial extrusion protein MatE (InterProIPR002528); BEST Arabidopsis thaliana protein match is MATE ef…	MATE efflux family protein [Arabidopsis thaliana] >gi|10177740|dbj|BAB11053.1| integral membrane protein
BnaC02g15400D	AT5G52030	--	chrC02:10960584 - 10962472	TraB family protein; CONTAINS InterPro DOMAIN/s Pheromone shutdownrelated, TraB (InterProIPR002816); BEST Arabidopsis thaliana protein match is TraB family protein (TAIRAT1G05270.1); Has 35333 Blast hits to 34131 proteins in 2444 species Archae 798; Bacteria 22429; Metazoa 974; Fungi 991; Plants 531; Viruses 0; Other Eukaryotes 9610 (source NCBI BLink).	AT5g52030/MSG15_11 [Arabidopsis thaliana] >gi|23308347|gb|AAN18143.1| At5g52030/MSG15_11 [Arabidopsis thaliana]
BnaC02g15420D	AT5G52020	ERF025	chrC02:10991234 - 10996135	Integrasetype DNAbinding superfamily protein; FUNCTIONS IN DNA binding, transcription activator activity, sequencespecific DNA binding transcription factor activity; INVOLVED IN defense response to fungus; LOCATED IN chloroplast; EXPRESSED IN root, flower; EXPRESSED DURING petal differentiation and expansion stage; CONTAINS InterPro DOMAIN/s DNAbinding, integrasetype (InterProIPR016177), Pathogen…	AP2 domain
BnaC02g15430D	AT5G51960	--	chrC02:10997240 - 10998295	CONTAINS InterPro DOMAIN/s	Complex 1 LYR protein (InterPro
BnaC02g15440D	AT5G51950	MSG15.3	chrC02:11001007 - 11003773	Glucosemethanolcholine (GMC) oxidoreductase family protein; FUNCTIONS IN aldehydelyase activity, oxidoreductase activity, acting on CHOH group of donors, FAD binding; INVOLVED IN response to salt stress; LOCATED IN endomembrane system; EXPRESSED IN 11 plant structures; EXPRESSED DURING 4 anthesis, C globular stage, F mature embryo stage, petal differentiation and expansion stage, E expanded cotyl…	Glucose
BnaC02g15450D	AT5G51950	MSG15.3	chrC02:11004061 - 11006380	Glucosemethanolcholine (GMC) oxidoreductase family protein; FUNCTIONS IN aldehydelyase activity, oxidoreductase activity, acting on CHOH group of donors, FAD binding; INVOLVED IN response to salt stress; LOCATED IN endomembrane system; EXPRESSED IN 11 plant structures; EXPRESSED DURING 4 anthesis, C globular stage, F mature embryo stage, petal differentiation and expansion stage, E expanded cotyl…	Glucose
BnaC02g15470D	AT5G51920	--	chrC02:11040365 - 11042069	Pyridoxal phosphate (PLP)dependent transferases superfamily protein; FUNCTIONS IN pyridoxal phosphate binding, catalytic activity; INVOLVED IN metabolic process; LOCATED IN chloroplast; CONTAINS InterPro DOMAIN/s Pyridoxal phosphatedependent transferase, major domain (InterProIPR015424), Aminotransferase, class V/Cysteine desulfurase (InterProIPR000192), Pyridoxal phosphatedependent transferase, …	PREDICTED
BnaC02g15480D	AT5G51910	TCP19	chrC02:11044529 - 11045396	TCP family transcription factor ; CONTAINS InterPro DOMAIN/s Transcription factor, TCP (InterProIPR005333), Transcription factor TCP subgroup (InterProIPR017887); BEST Arabidopsis thaliana protein match is TCP family transcription factor (TAIRAT2G45680.1); Has 731 Blast hits to 731 proteins in 79 species Archae 0; Bacteria 0; Metazoa 0; Fungi 0; Plants 731; Viruses 0; Other Eukaryotes 0 (source N…	transcription factor TCP19 [Arabidopsis thaliana] >gi|30696122|ref|NP_851173.1| transcription factor TCP19 [Arabidopsis thaliana] >gi|75180423|sp|Q9LT89.1|TCP19_ARATH RecName
BnaC02g15490D	AT3G08600	--	chrC02:11052286 - 11052562	Protein of unknown function (DUF1191); FUNCTIONS IN	molecular_function unknown; INVOLVED IN
BnaC02g15500D	AT5G51890	PER66	chrC02:11056194 - 11057360	Peroxidase superfamily protein; FUNCTIONS IN peroxidase activity; INVOLVED IN response to oxidative stress, oxidation reduction; LOCATED IN endomembrane system; EXPRESSED IN 24 plant structures; EXPRESSED DURING 13 growth stages; CONTAINS InterPro DOMAIN/s Haem peroxidase (InterProIPR010255), Plant peroxidase (InterProIPR000823), Peroxidases heamligand binding site (InterProIPR019793), Haem perox…	unnamed protein product [Thellungiella halophila] >gi|312282049|dbj|BAJ33890.1| unnamed protein product [Thellungiella halophila]
BnaC02g15510D	AT5G51810	GA20OX2	chrC02:11109631 - 11111035	gibberellin 20 oxidase 2 (GA20OX2); CONTAINS InterPro DOMAIN/s Isopenicillin N synthase (InterProIPR002283), Oxoglutarate/irondependent oxygenase (InterProIPR005123); BEST Arabidopsis thaliana protein match is 2oxoglutarate (2OG) and Fe(II)dependent oxygenase superfamily protein (TAIRAT4G25420.1); Has 8534 Blast hits to 8499 proteins in 990 species Archae 0; Bacteria 1114; Metazoa 120; Fungi 1000…	gibberellin 20 oxidase 2 [Arabidopsis thaliana] >gi|60390167|sp|Q39111.1|GAOX2_ARATH RecName
BnaC02g15520D	AT5G51800	--	chrC02:11127291 - 11130925	Protein kinase superfamily protein; FUNCTIONS IN protein kinase activity, ATP binding; INVOLVED IN protein amino acid phosphorylation; LOCATED IN cellular_component unknown; EXPRESSED IN shoot apex, embryo; EXPRESSED DURING E expanded cotyledon stage, D bilateral stage; CONTAINS InterPro DOMAIN/s Serine/threonineprotein kinaselike domain (InterProIPR017442), Protein kinaselike domain (InterProIPR…	protein kinase family protein [Arabidopsis thaliana] >gi|10177879|dbj|BAB11249.1| unnamed protein product [Arabidopsis thaliana] >gi|332008745|gb|AED96128.1| protein kinase family protein [Arabidopsis thaliana]
BnaC02g15530D	AT1G58070	--	chrC02:11153240 - 11153962	unknown protein; Has 286 Blast hits to 266 proteins in 81 species	Archae
BnaC02g15540D	AT5G51780	BHLH36	chrC02:11158562 - 11160168	basic helixloophelix (bHLH) DNAbinding superfamily protein; FUNCTIONS IN DNA binding, sequencespecific DNA binding transcription factor activity; INVOLVED IN regulation of transcription; LOCATED IN nucleus; CONTAINS InterPro DOMAIN/s Helixloophelix DNAbinding domain (InterProIPR001092), Helixloophelix DNAbinding (InterProIPR011598); BEST Arabidopsis thaliana protein match is basic helixloophelix …	basix helix
BnaC02g15550D	AT5G51700	RAR1	chrC02:11173489 - 11175301	PPHB SUSCEPTIBLE 2 (PBS2); CONTAINS InterPro DOMAIN/s	Cysteine/histidine
BnaC02g15560D	AT5G51690	ACS12	chrC02:11176514 - 11179330	1aminocyclopropane1carboxylate synthase 12 (ACS12); CONTAINS InterPro DOMAIN/s Aminotransferase, class I/classII (InterProIPR004839), 1aminocyclopropane1carboxylate synthase (InterProIPR001176), Pyridoxal phosphatedependent transferase, major domain (InterProIPR015424), Aminotransferases, classI, pyridoxalphosphatebinding site (InterProIPR004838), Pyridoxal phosphatedependent transferase, major r…	1
BnaC02g15570D	AT5G53635	--	chrC02:11180095 - 11180962	Fbox/RNIlike/FBDlike domainscontaining protein; CONTAINS InterPro DOMAIN/s Fbox domain, cyclinlike (InterProIPR001810), FBD (InterProIPR013596), Fbox domain, Skp2like (InterProIPR022364), FBDlike (InterProIPR006566), Leucinerich repeat 2 (InterProIPR013101); BEST Arabidopsis thaliana protein match is Fbox/RNIlike/FBDlike domainscontaining protein (TAIRAT5G25850.1).	F
BnaC02g15580D	AT5G51670	--	chrC02:11191042 - 11192517	Protein of unknown function (DUF668); INVOLVED IN biological_process unknown; LOCATED IN chloroplast; EXPRESSED IN inflorescence meristem, hypocotyl, root, flower; EXPRESSED DURING petal differentiation and expansion stage; CONTAINS InterPro DOMAIN/s Protein of unknown function DUF668 (InterProIPR007700), Protein of unknown function DUF3475 (InterProIPR021864); BEST Arabidopsis thaliana protein m…	predicted protein [Arabidopsis lyrata subsp. lyrata] >gi|297309956|gb|EFH40380.1| predicted protein [Arabidopsis lyrata subsp. lyrata]
BnaC02g15600D	AT5G51660	CPSF160	chrC02:11203772 - 11212376	cleavage and polyadenylation specificity factor 160 (CPSF160); FUNCTIONS IN nucleic acid binding; INVOLVED IN mRNA cleavage, mRNA polyadenylation; LOCATED IN nucleus; EXPRESSED IN 21 plant structures; EXPRESSED DURING 13 growth stages; CONTAINS InterPro DOMAIN/s Cleavage/polyadenylation specificity factor, A subunit, Cterminal (InterProIPR004871); BEST Arabidopsis thaliana protein match is damage…	cleavage and polyadenylation specificity factor subunit 1 [Arabidopsis thaliana] >gi|290457637|sp|Q9FGR0.2|CPSF1_ARATH RecName
BnaC03g24700D	AT2G44130	--	chrC03:13877750 - 13879070	Galactose oxidase/kelch repeat superfamily protein; CONTAINS InterPro DOMAIN/s Fbox domain, cyclinlike (InterProIPR001810), Galactose oxidase/kelch, betapropeller (InterProIPR011043), Kelch repeat type 1 (InterProIPR006652), Kelch related (InterProIPR013089), Kelchtype beta propeller (InterProIPR015915); BEST Arabidopsis thaliana protein match is Galactose oxidase/kelch repeat superfamily protein…	unknown [Arabidopsis thaliana]
BnaC03g24710D	AT2G44150	ASHH3	chrC03:13880643 - 13883273	histonelysine Nmethyltransferase ASHH3 (ASHH3); FUNCTIONS IN histonelysine Nmethyltransferase activity; INVOLVED IN biological_process unknown; LOCATED IN nucleus; EXPRESSED IN 23 plant structures; EXPRESSED DURING 13 growth stages; CONTAINS InterPro DOMAIN/s SET domain (InterProIPR001214), PostSET domain (InterProIPR003616), AWS (InterProIPR006560); BEST Arabidopsis thaliana protein match is his…	SET domain
BnaC03g24720D	AT2G44180	MAP2A	chrC03:13885856 - 13888787	methionine aminopeptidase 2A (MAP2A); FUNCTIONS IN metalloexopeptidase activity, aminopeptidase activity; INVOLVED IN Nterminal protein amino acid modification; LOCATED IN cytoplasm; EXPRESSED IN 23 plant structures; EXPRESSED DURING 13 growth stages; CONTAINS InterPro DOMAIN/s Peptidase M24, structural domain (InterProIPR000994), Peptidase M24A, methionine aminopeptidase, subfamily 2 (InterProIP…	methionine aminopeptidase
BnaC03g24730D	AT2G44190	EDE1	chrC03:13889182 - 13890935	ENDOSPERM DEFECTIVE 1 (EDE1); CONTAINS InterPro DOMAIN/s	Protein of unknown function DUF566 (InterPro
BnaC03g24740D	AT2G44200	--	chrC03:13891319 - 13893313	CBF1interacting corepressor CIR, Nterminal;PremRNA splicing factor; CONTAINS InterPro DOMAIN/s CBF1interacting corepressor CIR, Nterminal (InterProIPR019339), PremRNA splicing factor (InterProIPR022209); BEST Arabidopsis thaliana protein match is CBF1interacting corepressor CIR, Nterminal;PremRNA splicing factor (TAIRAT2G44195.1); Has 59661 Blast hits to 33745 proteins in 1751 species Archae 130;…	pre
BnaC03g24750D	AT1G43760	--	chrC03:13894945 - 13900275	DNAse Ilike superfamily protein; CONTAINS InterPro DOMAIN/s Endonuclease/exonuclease/phosphatase (InterProIPR005135), RNAdirected DNA polymerase (reverse transcriptase), related (InterProIPR015706); BEST Arabidopsis thaliana protein match is DNAse Ilike superfamily protein (TAIRAT1G40390.1); Has 1816 Blast hits to 1744 proteins in 56 species Archae 0; Bacteria 6; Metazoa 164; Fungi 4; Plants 1633…	predicted protein [Arabidopsis lyrata subsp. lyrata] >gi|297321630|gb|EFH52051.1| predicted protein [Arabidopsis lyrata subsp. lyrata]
BnaC03g24760D	AT2G44220	--	chrC03:13904888 - 13905281	Protein of Unknown Function (DUF239); INVOLVED IN biological_process unknown; LOCATED IN endomembrane system; CONTAINS InterPro DOMAIN/s Protein of unknown function DUF239, plant (InterProIPR004314); BEST Arabidopsis thaliana protein match is Protein of Unknown Function (DUF239) (TAIRAT2G44240.1); Has 30201 Blast hits to 17322 proteins in 780 species Archae 12; Bacteria 1396; Metazoa 17338; Fungi…	uncharacterized protein [Arabidopsis thaliana] >gi|330255299|gb|AEC10393.1| uncharacterized protein AT2G44220 [Arabidopsis thaliana]
BnaC03g24770D	AT2G44220	--	chrC03:13908773 - 13913633	Protein of Unknown Function (DUF239); INVOLVED IN biological_process unknown; LOCATED IN endomembrane system; CONTAINS InterPro DOMAIN/s Protein of unknown function DUF239, plant (InterProIPR004314); BEST Arabidopsis thaliana protein match is Protein of Unknown Function (DUF239) (TAIRAT2G44240.1); Has 30201 Blast hits to 17322 proteins in 780 species Archae 12; Bacteria 1396; Metazoa 17338; Fungi…	uncharacterized protein [Arabidopsis thaliana] >gi|330255299|gb|AEC10393.1| uncharacterized protein AT2G44220 [Arabidopsis thaliana]
BnaC03g24780D	AT2G44260	--	chrC03:13915250 - 13917161	Plant protein of unknown function (DUF946); FUNCTIONS IN molecular_function unknown; INVOLVED IN Nterminal protein myristoylation; LOCATED IN cellular_component unknown; EXPRESSED IN 13 plant structures; EXPRESSED DURING 4 anthesis, C globular stage, petal differentiation and expansion stage; CONTAINS InterPro DOMAIN/s Protein of unknown function DUF946 (InterProIPR009291); BEST Arabidopsis thali…	uncharacterized protein [Arabidopsis thaliana] >gi|15293039|gb|AAK93630.1| unknown protein [Arabidopsis thaliana] >gi|20197184|gb|AAC16076.2| expressed protein [Arabidopsis thaliana] >gi|22136978|gb|AAM91718.1| unknown protein [Arabidopsis thaliana] >gi|330255303|gb|AEC10397.1| uncharacterized protein AT2G44260 [Arabidopsis thaliana]
BnaC03g24790D	AT2G44310	--	chrC03:13918631 - 13919219	Calciumbinding EFhand family protein; FUNCTIONS IN calcium ion binding; INVOLVED IN biological_process unknown; LOCATED IN cellular_component unknown; EXPRESSED IN 23 plant structures; EXPRESSED DURING 14 growth stages; CONTAINS InterPro DOMAIN/s EFHand 1, calciumbinding site (InterProIPR018247), EFHAND 2 (InterProIPR018249), EFhandlike domain (InterProIPR011992), Calciumbinding EFhand (InterProI…	calcium
BnaC03g24800D	AT2G44330	--	chrC03:13938661 - 13939195	RING/Ubox superfamily protein; CONTAINS InterPro DOMAIN/s Zinc finger, RINGtype (InterProIPR001841), Zinc finger, C3HC4 RINGtype (InterProIPR018957); BEST Arabidopsis thaliana protein match is RING/Ubox superfamily protein (TAIRAT3G60080.1); Has 9788 Blast hits to 9762 proteins in 267 species Archae 0; Bacteria 0; Metazoa 2640; Fungi 885; Plants 4936; Viruses 11; Other Eukaryotes 1316 (source NCB…	zinc finger family protein [Arabidopsis lyrata subsp. lyrata] >gi|297322371|gb|EFH52792.1| zinc finger family protein [Arabidopsis lyrata subsp. lyrata]
BnaC03g24810D	AT2G44340	VQ18	chrC03:13942647 - 13943088	VQ motif	containing protein; CONTAINS InterPro DOMAIN/s
BnaC03g24820D	AT2G44350	CSY4	chrC03:13949877 - 13954302	ATCS; FUNCTIONS IN citrate (SI)synthase activity, zinc ion binding, ATP binding; INVOLVED IN response to cadmium ion, tricarboxylic acid cycle; LOCATED IN mitochondrion, cell wall, chloroplast; EXPRESSED IN 25 plant structures; EXPRESSED DURING 15 growth stages; CONTAINS InterPro DOMAIN/s Citrate synthaselike, large alpha subdomain (InterProIPR016142), Citrate synthase, eukaryotic (InterProIPR010…	citrate synthase 4 [Arabidopsis thaliana] >gi|14423562|gb|AAK62463.1|AF387018_1 citrate synthase [Arabidopsis thaliana] >gi|20197191|gb|AAC16084.2| citrate synthase [Arabidopsis thaliana] >gi|30387583|gb|AAP31957.1| At2g44350 [Arabidopsis thaliana] >gi|330255316|gb|AEC10410.1| citrate synthase 4 [Arabidopsis thaliana]
BnaC03g24830D	AT2G44380	--	chrC03:13957764 - 13958493	Cysteine/Histidinerich C1 domain family protein; CONTAINS InterPro DOMAIN/s DC1 (InterProIPR004146), C1like (InterProIPR011424); BEST Arabidopsis thaliana protein match is Cysteine/Histidinerich C1 domain family protein (TAIRAT5G43520.1); Has 1997 Blast hits to 742 proteins in 26 species Archae 0; Bacteria 0; Metazoa 5; Fungi 0; Plants 1986; Viruses 0; Other Eukaryotes 6 (source NCBI BLink).	cysteine/histidine
BnaC03g24840D	AT2G44440	EML4	chrC03:13960770 - 13966424	Emsy N Terminus (ENT) domain	containing protein; FUNCTIONS IN
BnaC03g24850D	AT2G44510	--	chrC03:13966672 - 13968097	CDK inhibitor P21 binding protein; FUNCTIONS IN	molecular_function unknown; INVOLVED IN
BnaC03g24860D	AT2G44570	AtGH9B12	chrC03:13968266 - 13970181	glycosyl hydrolase 9B12 (GH9B12); FUNCTIONS IN hydrolase activity, hydrolyzing Oglycosyl compounds, catalytic activity; INVOLVED IN carbohydrate metabolic process; LOCATED IN endomembrane system; EXPRESSED IN male gametophyte, pollen tube; EXPRESSED DURING L mature pollen stage; CONTAINS InterPro DOMAIN/s Sixhairpin glycosidase (InterProIPR012341), Glycoside hydrolase, family 9, active site (Inte…	glycosyl hydrolase family 9 protein [Arabidopsis lyrata subsp. lyrata] >gi|297327804|gb|EFH58224.1| glycosyl hydrolase family 9 protein [Arabidopsis lyrata subsp. lyrata]
BnaC03g24870D	AT2G44610	RABH1B	chrC03:13973441 - 13975251	RAB6A; FUNCTIONS IN protein binding, GTP binding; INVOLVED IN secretion by cell; LOCATED IN plasma membrane, membrane fraction; EXPRESSED IN 25 plant structures; EXPRESSED DURING 15 growth stages; CONTAINS InterPro DOMAIN/s Ras GTPase (InterProIPR001806), Small GTPbinding protein (InterProIPR005225), Small GTPase (InterProIPR020851), Ras (InterProIPR013753), Ras small GTPase, Rab type (InterProIP…	Ras
BnaC03g24880D	AT2G44620	MTACP1	chrC03:13975465 - 13976438	mitochondrial acyl carrier protein 1 (MTACP1); FUNCTIONS IN phosphopantetheine binding, acyl carrier activity, cofactor binding; INVOLVED IN fatty acid biosynthetic process; LOCATED IN mitochondrion, mitochondrial matrix; EXPRESSED IN 23 plant structures; EXPRESSED DURING 15 growth stages; CONTAINS InterPro DOMAIN/s Phosphopantetheinebinding (InterProIPR006163), Acyl carrier protein (ACP) (InterP…	mtACP
BnaC03g24890D	AT2G44640	--	chrC03:13976713 - 13978526	FUNCTIONS IN molecular_function unknown; INVOLVED IN biological_process unknown; LOCATED IN mitochondrion, chloroplast, plasma membrane, plastid, chloroplast envelope; EXPRESSED IN 23 plant structures; EXPRESSED DURING 13 growth stages; CONTAINS InterPro DOMAIN/s Protein of unknown function DUF3769 (InterProIPR022244); BEST Arabidopsis thaliana protein match is pigment defective 320 (TAIRAT3G0696…	At2g44640/F16B22.13 [Arabidopsis thaliana] >gi|19699152|gb|AAL90942.1| At2g44640/F16B22.13 [Arabidopsis thaliana]
BnaC03g24900D	AT2G44670	--	chrC03:13982857 - 13983547	Protein of unknown function (DUF581); CONTAINS InterPro DOMAIN/s	Protein of unknown function DUF581 (InterPro
BnaC03g24910D	AT2G44680	CKB4	chrC03:13984316 - 13985929	casein kinase II beta subunit 4 (CKB4); CONTAINS InterPro DOMAIN/s Casein kinase II, regulatory subunit, alphahelical (InterProIPR016149), Casein kinase II, regulatory subunit, betasheet (InterProIPR016150), Casein kinase II, regulatory subunit (InterProIPR000704); BEST Arabidopsis thaliana protein match is casein kinase II beta chain 3 (TAIRAT3G60250.1); Has 1093 Blast hits to 1091 proteins in 2…	casein kinase II beta subunit 4 [Arabidopsis thaliana] >gi|6016428|sp|O80507.1|CSK2E_ARATH RecName
BnaC03g24920D	AT2G44730	--	chrC03:13986425 - 13987487	Alcohol dehydrogenase transcription factor Myb/SANTlike family protein; FUNCTIONS IN sequencespecific DNA binding transcription factor activity; INVOLVED IN regulation of transcription; LOCATED IN chloroplast; EXPRESSED IN 22 plant structures; EXPRESSED DURING 13 growth stages; CONTAINS InterPro DOMAIN/s SANT, DNAbinding (InterProIPR001005), MADF domain (InterProIPR006578), MYBlike (InterProIPR01…	transcription factor [Arabidopsis lyrata subsp. lyrata] >gi|297327816|gb|EFH58236.1| transcription factor [Arabidopsis lyrata subsp. lyrata]
BnaC03g24930D	AT2G44740	CYCU4-1	chrC03:13990198 - 13991383	cyclin p4;1 (CYCP4;1); CONTAINS InterPro DOMAIN/s Negative regulatory factor PREG (InterProIPR012389), Cyclinlike (InterProIPR011028), Cyclin, Nterminal (InterProIPR006671), Cyclin (InterProIPR006670); BEST Arabidopsis thaliana protein match is CYCLIN P4;2 (TAIRAT5G61650.1); Has 1474 Blast hits to 1416 proteins in 218 species Archae 0; Bacteria 18; Metazoa 247; Fungi 710; Plants 236; Viruses 0; O…	cyclin p4;1 [Arabidopsis thaliana] >gi|75278850|sp|O80513.1|CCU41_ARATH RecName
BnaC03g24940D	ATMG00310	-	chrC03:13992890 - 13998636	RNAdirected DNA polymerase (reverse transcriptase)related family protein; CONTAINS InterPro DOMAIN/s RNAdirected DNA polymerase (reverse transcriptase), related (InterProIPR015706); BEST Arabidopsis thaliana protein match is Ribonuclease Hlike superfamily protein (TAIRAT4G29090.1).	putative non
BnaC03g24950D	AT4G09490	--	chrC03:13998725 - 13998986	Polynucleotidyl transferase, ribonuclease Hlike superfamily protein; FUNCTIONS IN ribonuclease H activity, nucleic acid binding; INVOLVED IN biological_process unknown; LOCATED IN endomembrane system; EXPRESSED IN 21 plant structures; EXPRESSED DURING 13 growth stages; CONTAINS InterPro DOMAIN/s Polynucleotidyl transferase, ribonuclease H fold (InterProIPR012337), Ribonuclease H (InterProIPR00215…	disease resistance protein [Brassica rapa subsp. pekinensis]
BnaC03g24960D	AT2G44745	WRKY12	chrC03:14003325 - 14004929	WRKY family transcription factor; CONTAINS InterPro DOMAIN/s	DNA
BnaC03g24970D	AT2G07760	--	chrC03:14010808 - 14017134	Zinc knuckle (CCHCtype) family protein; FUNCTIONS IN zinc ion binding, nucleic acid binding; INVOLVED IN biological_process unknown; LOCATED IN cellular_component unknown; EXPRESSED IN sperm cell; CONTAINS InterPro DOMAIN/s Zinc finger, CCHCtype (InterProIPR001878); BEST Arabidopsis thaliana protein match is unknown protein (TAIRAT5G28823.1); Has 107 Blast hits to 101 proteins in 20 species Archa…	hypothetical protein CARUB_v10021307mg [Capsella rubella] >gi|482569640|gb|EOA33828.1| hypothetical protein CARUB_v10021307mg [Capsella rubella]
BnaC03g24990D	AT2G44770	--	chrC03:14022835 - 14024443	ELMO/CED12 family protein; FUNCTIONS IN molecular_function unknown; INVOLVED IN phagocytosis; LOCATED IN cytoskeleton; EXPRESSED IN 23 plant structures; EXPRESSED DURING 13 growth stages; CONTAINS InterPro DOMAIN/s Engulfment/cell motility, ELMO (InterProIPR006816); BEST Arabidopsis thaliana protein match is ELMO/CED12 family protein (TAIRAT3G60260.4); Has 866 Blast hits to 866 proteins in 151 sp…	At2g44770/F16B22.26 [Arabidopsis thaliana] >gi|15810014|gb|AAL06934.1| At2g44770/F16B22.26 [Arabidopsis thaliana]
BnaC03g25000D	AT3G60270	-	chrC03:14025605 - 14026690	Cupredoxin superfamily protein; FUNCTIONS IN electron carrier activity, copper ion binding; LOCATED IN anchored to membrane; CONTAINS InterPro DOMAIN/s Plastocyaninlike (InterProIPR003245), Cupredoxin (InterProIPR008972); BEST Arabidopsis thaliana protein match is uclacyanin 2 (TAIRAT2G44790.1); Has 2285 Blast hits to 1861 proteins in 153 species Archae 3; Bacteria 173; Metazoa 13; Fungi 54; Plan…	blue copper
BnaC03g25010D	AT3G60320	--	chrC03:14031076 - 14034450	Protein of unknown function (DUF630 and DUF632); CONTAINS InterPro DOMAIN/s Protein of unknown function DUF630 (InterProIPR006868), Protein of unknown function DUF632 (InterProIPR006867); BEST Arabidopsis thaliana protein match is Protein of unknown function (DUF630 and DUF632) (TAIRAT1G02110.1); Has 6322 Blast hits to 3163 proteins in 311 species Archae 2; Bacteria 139; Metazoa 1165; Fungi 535; …	predicted protein [Arabidopsis lyrata subsp. lyrata] >gi|297327822|gb|EFH58242.1| predicted protein [Arabidopsis lyrata subsp. lyrata]
BnaC03g25020D	AT2G44880	PCMP-E9	chrC03:14036494 - 14037470	Pentatricopeptide repeat (PPR	like) superfamily protein; INVOLVED IN
BnaC03g25030D	AT2G44900	FBX5	chrC03:14038261 - 14041147	ARABIDILLO1 (ARABIDILLO1); FUNCTIONS IN ubiquitinprotein ligase activity, binding; INVOLVED IN lateral root development; LOCATED IN nucleus; EXPRESSED IN 26 plant structures; EXPRESSED DURING 15 growth stages; CONTAINS InterPro DOMAIN/s Fbox domain, cyclinlike (InterProIPR001810), Armadillolike helical (InterProIPR011989), Armadillo (InterProIPR000225), Armadillotype fold (InterProIPR016024); BES…	protein ARABIDILLO 1 [Arabidopsis thaliana] >gi|75219086|sp|O22161.1|ADLO1_ARATH RecName Full=Protein ARABIDILLO 1; AltName Full=Fbox only protein 5 >gi|2344894|gb|AAC31834.1| Fbox protein family, AtFBX5 [Arabidopsis thaliana] >gi|330255388|gb|AEC10482.1| protein ARABIDILLO 1 [Arabidopsis thaliana]
BnaC03g25050D	AT2G44940	ERF034	chrC03:14062672 - 14063503	Integrasetype DNAbinding superfamily protein; FUNCTIONS IN DNA binding, sequencespecific DNA binding transcription factor activity; INVOLVED IN regulation of transcription, DNAdependent; LOCATED IN nucleus, chloroplast; EXPRESSED IN 22 plant structures; EXPRESSED DURING 13 growth stages; CONTAINS InterPro DOMAIN/s DNAbinding, integrasetype (InterProIPR016177), Pathogenesisrelated transcriptional …	ethylene
BnaC03g31610D	AT4G00820	iqd17	chrC03:19439178 - 19441308	IQ	domain 17 (iqd17); CONTAINS InterPro DOMAIN/s
BnaC03g31620D	AT2G31580	THG1	chrC03:19442778 - 19444268	tRNAHis guanylyltransferase; FUNCTIONS IN	molecular_function unknown; INVOLVED IN
BnaC03g31630D	AT4G00830	--	chrC03:19445291 - 19448194	RNAbinding (RRM/RBD/RNP motifs) family protein; FUNCTIONS IN RNA binding, nucleotide binding, nucleic acid binding; INVOLVED IN biological_process unknown; LOCATED IN cellular_component unknown; EXPRESSED IN 23 plant structures; EXPRESSED DURING 15 growth	RNA recognition motif
BnaC03g31640D	AT4G00840	PAT12	chrC03:19448254 - 19450318	DHHCtype zinc finger family protein; FUNCTIONS IN zinc ion binding; INVOLVED IN biological_process unknown; LOCATED IN endomembrane system; EXPRESSED IN male gametophyte, pollen tube; EXPRESSED DURING L mature pollen stage, M germinated pollen stage; CONT	zinc ion binding protein [Arabidopsis lyrata subsp. lyrata] >gi|297318763|gb|EFH49185.1| zinc ion binding protein [Arabidopsis lyrata subsp. lyrata]
BnaC03g31650D	AT4G00860	ATOZI1	chrC03:19452638 - 19453662	ATOZI1; FUNCTIONS IN molecular_function unknown; INVOLVED IN response to reactive oxygen species, response to bacterium, response to ozone; LOCATED IN mitochondrion, peroxisome, plastid, membrane; EXPRESSED IN 25 plant structures; EXPRESSED DURING 15 grow	putative pathogenesis
BnaC03g31660D	AT4G00910	ALMT10	chrC03:19453753 - 19456729	Aluminium activated malate transporter family protein; FUNCTIONS IN molecular_function unknown; INVOLVED IN response to aluminum ion; LOCATED IN cellular_component unknown; EXPRESSED IN sepal, root, pedicel; EXPRESSED DURING 4 anthesis; CONTAINS InterPro	aluminum activated malate transporter family protein [Arabidopsis thaliana] >gi|313118285|sp|O23086.2|ALMTA_ARATH RecName
BnaC03g31670D	AT4G00990	--	chrC03:19464921 - 19466338	Transcription factor jumonji (jmjC) domaincontaining protein; FUNCTIONS IN sequencespecific DNA binding transcription factor activity, zinc ion binding; EXPRESSED IN 20 plant structures; EXPRESSED DURING 8 growth stages; CONTAINS InterPro DOMAIN/s Transcr	transcription factor jumonji domain
BnaC03g31690D	AT4G00990	--	chrC03:19476195 - 19486449	Transcription factor jumonji (jmjC) domaincontaining protein; FUNCTIONS IN sequencespecific DNA binding transcription factor activity, zinc ion binding; EXPRESSED IN 20 plant structures; EXPRESSED DURING 8 growth stages; CONTAINS InterPro DOMAIN/s Transcr	putative protein (fragment) [Arabidopsis thaliana] >gi|7267596|emb|CAB80908.1| putative protein (fragment) [Arabidopsis thaliana]
BnaC03g31700D	AT4G01000	--	chrC03:19486650 - 19488335	Ubiquitin	like superfamily protein; FUNCTIONS IN
BnaC03g31720D	AT4G01010	CNGC13	chrC03:19518055 - 19522572	cyclic nucleotidegated channel 13 (CNGC13); FUNCTIONS IN ion channel activity, cyclic nucleotide binding, calmodulin binding; INVOLVED IN ion transport, transmembrane transport; LOCATED IN membrane; EXPRESSED IN 13 plant structures; EXPRESSED DURING 9 gro	ATCNGC13 [Arabidopsis lyrata subsp. lyrata] >gi|297318752|gb|EFH49174.1| ATCNGC13 [Arabidopsis lyrata subsp. lyrata]
BnaC03g31730D	AT4G01026	PYL7	chrC03:19523341 - 19524503	Abscisic acid receptor PYR1	like 7 (PYL7); CONTAINS InterPro DOMAIN/s
BnaC03g31740D	AT4G01040	--	chrC03:19525414 - 19530521	Glycosyl hydrolase superfamily protein; FUNCTIONS IN cation binding, hydrolase activity, hydrolyzing Oglycosyl compounds, chitinase activity, catalytic activity; INVOLVED IN carbohydrate metabolic process; LOCATED IN cellular_component unknown; EXPRESSED	A_IG002N01.31 gene product [Arabidopsis thaliana]
BnaC03g31750D	AT4G01060	ETC3	chrC03:19539026 - 19539524	CAPRICElike MYB3 (CPL3); CONTAINS InterPro DOMAIN/s SANT, DNAbinding (InterProIPR001005), Homeodomainlike (InterProIPR009057), Myb, DNAbinding (InterProIPR014778), Homeodomainrelated (InterProIPR012287), MYBlike (InterProIPR017877), Myb transcription fact	CAPRICE
BnaC03g31760D	AT4G01070	UGT72B1	chrC03:19544601 - 19545567	GT72B1; FUNCTIONS IN UDPglycosyltransferase activity, UDPglucosyltransferase activity, transferase activity, transferring glycosyl groups; INVOLVED IN xenobiotic metabolic process, response to cyclopentenone, response to salt stress, response to toxin, xe	glucosyltransferase [Brassica napus]
BnaC03g31770D	AT4G01070	UGT72B1	chrC03:19545664 - 19546038	GT72B1; FUNCTIONS IN UDPglycosyltransferase activity, UDPglucosyltransferase activity, transferase activity, transferring glycosyl groups; INVOLVED IN xenobiotic metabolic process, response to cyclopentenone, response to salt stress, response to toxin, xe	unnamed protein product [Thellungiella halophila]
BnaC03g31780D	AT4G01090	--	chrC03:19554867 - 19558061	Protein of unknown function (DUF3133); CONTAINS InterPro DOMAIN/s	Protein of unknown function DUF3133 (InterPro
BnaC03g31790D	AT4G01100	ADNT1	chrC03:19562236 - 19565093	adenine nucleotide transporter 1 (ADNT1); FUNCTIONS IN binding, ADP transmembrane transporter activity, ATP transmembrane transporter activity, AMP transmembrane transporter activity; INVOLVED IN in 6 processes; LOCATED IN mitochondrion, mitochondrial inn	mitochondrial substrate carrier family protein [Arabidopsis lyrata subsp. lyrata] >gi|297320833|gb|EFH51255.1| mitochondrial substrate carrier family protein [Arabidopsis lyrata subsp. lyrata]
BnaC03g31800D	AT4G01110	--	chrC03:19565283 - 19566196	unknown protein; BEST Arabidopsis thaliana protein match is	unknown protein (TAIR
BnaC03g31810D	AT4G01130	--	chrC03:19584100 - 19585851	GDSLlike Lipase/Acylhydrolase superfamily protein; FUNCTIONS IN hydrolase activity, acting on ester bonds, carboxylesterase activity; INVOLVED IN lipid metabolic process; LOCATED IN endomembrane system; EXPRESSED IN 18 plant structures; EXPRESSED DURING 1	predicted protein [Arabidopsis lyrata subsp. lyrata] >gi|297320832|gb|EFH51254.1| predicted protein [Arabidopsis lyrata subsp. lyrata]
BnaC03g31830D	AT4G01150	CURT1A	chrC03:19592014 - 19593344	unknown protein; FUNCTIONS IN molecular_function unknown; INVOLVED IN biological_process unknown; LOCATED IN thylakoid, chloroplast thylakoid membrane, chloroplast, plastoglobule, chloroplast envelope; EXPRESSED IN 23 plant structures; EXPRESSED DURING 14	unknown [Arabidopsis thaliana]
BnaC03g31840D	AT3G61600	POB1	chrC03:19593508 - 19595521	POZ/BTB containin Gprotein 1 (POB1); CONTAINS InterPro DOMAIN/s BTB/POZ (InterProIPR013069), BTB/Kelchassociated (InterProIPR011705), BTB/POZ fold (InterProIPR011333), Kelch related (InterProIPR013089), BTB/POZlike (InterProIPR000210); BEST Arabidopsis th	BTB/POZ domain
BnaC03g31850D	AT4G01210	--	chrC03:19605006 - 19609674	glycosyl transferase family 1 protein; FUNCTIONS IN transferase activity, transferring glycosyl groups; INVOLVED IN biosynthetic process; LOCATED IN cellular_component unknown; EXPRESSED IN 22 plant structures; EXPRESSED DURING 13 growth stages; CONTAINS	glycosyl transferase family 1 protein [Arabidopsis thaliana] >gi|332656594|gb|AEE81994.1| glycosyl transferase family 1 protein [Arabidopsis thaliana] >gi|591401974|gb|AHL38714.1| glycosyltransferase, partial [Arabidopsis thaliana]
BnaC03g31860D	AT4G01220	MGP4	chrC03:19611862 - 19613586	Nucleotidediphosphosugar transferase family protein; FUNCTIONS IN molecular_function unknown; INVOLVED IN biological_process unknown; LOCATED IN endoplasmic reticulum; EXPRESSED IN 22 plant structures; EXPRESSED DURING 13 growth stages; CONTAINS InterPro	A_IG002N01.8 gene product [Arabidopsis thaliana]
BnaC03g31870D	AT4G01270	--	chrC03:19614052 - 19616443	RING/Ubox superfamily protein; FUNCTIONS IN zinc ion binding; EXPRESSED IN 12 plant structures; EXPRESSED DURING 7 growth stages; CONTAINS InterPro DOMAIN/s Zinc finger, RINGtype (InterProIPR001841), Zinc finger, C3HC4 RINGtype (InterProIPR018957); BEST A	RING/U
BnaC03g31880D	AT4G01290	--	chrC03:19616512 - 19622282	unknown protein; FUNCTIONS IN	molecular_function unknown; INVOLVED IN
BnaC03g31890D	AT4G01310	RPL5	chrC03:19623886 - 19626166	Ribosomal L5P family protein; FUNCTIONS IN structural constituent of ribosome; INVOLVED IN translation; LOCATED IN in 6 components; EXPRESSED IN 24 plant structures; EXPRESSED DURING 13 growth stages; CONTAINS InterPro DOMAIN/s Ribosomal protein L5 (Inter	ribosomal protein L5 family protein [Arabidopsis lyrata subsp. lyrata] >gi|297318733|gb|EFH49155.1| ribosomal protein L5 family protein [Arabidopsis lyrata subsp. lyrata]
BnaC03g31900D	AT4G01320	FACE1	chrC03:19626437 - 19629707	ATSTE24; FUNCTIONS IN endopeptidase activity, metalloendopeptidase activity; INVOLVED IN CAAXbox protein maturation, proteolysis; LOCATED IN endoplasmic reticulum, vacuole; EXPRESSED IN 25 plant structures; EXPRESSED DURING 13 growth stages; CONTAINS Inte	CAAX prenyl protease 1 homolog [Arabidopsis thaliana] >gi|75303258|sp|Q8RX88.1|FACE1_ARATH RecName
BnaC03g31910D	AT4G01370	MPK4	chrC03:19630688 - 19632968	MAP kinase 4 (MPK4); FUNCTIONS IN MAP kinase activity, kinase activity; INVOLVED IN in 14 processes; LOCATED IN nucleus, cytoplasm; EXPRESSED IN 24 plant structures; EXPRESSED DURING 13 growth stages; CONTAINS InterPro DOMAIN/s Protein kinase, ATP binding	mitogen
BnaC03g31920D	AT4G00770	--	chrC03:19633156 - 19634865	unknown protein; Has 127 Blast hits to 120 proteins in 33 species	Archae
BnaC03g31930D	AT4G00755	--	chrC03:19635923 - 19637618	Fbox family protein; CONTAINS InterPro DOMAIN/s Fbox domain, cyclinlike (InterProIPR001810), Fbox domain, Skp2like (InterProIPR022364); Has 80 Blast hits to 80 proteins in 29 species Archae 0; Bacteria 0; Metazoa 0; Fungi 11; Plants 57; Viruses 0; O	F
BnaC03g31940D	AT4G00752	PUX9	chrC03:19645957 - 19648837	UBX domaincontaining protein; FUNCTIONS IN molecular_function unknown; INVOLVED IN biological_process unknown; LOCATED IN cellular_component unknown; EXPRESSED IN cultured cell; CONTAINS InterPro DOMAIN/s UBX (InterProIPR001012), Ubiquitin interacting mot	UBX domain
BnaC03g31950D	AT4G00740	--	chrC03:19649423 - 19652659	SadenosylLmethioninedependent methyltransferases superfamily protein; CONTAINS InterPro DOMAIN/s Protein of unknown function DUF248, methyltransferase putative (InterProIPR004159); BEST Arabidopsis thaliana protein match is SadenosylLmethioninedependent m	type II membrane pectin methyltransferase [Arabidopsis thaliana] >gi|75163241|sp|Q93W95.1|PMTD_ARATH RecName
BnaC03g31960D	AT4G00730	ANL2	chrC03:19655620 - 19660662	ANTHOCYANINLESS 2 (ANL2); FUNCTIONS IN transcription regulator activity, sequencespecific DNA binding transcription factor activity; INVOLVED IN root development, anthocyanin accumulation in tissues in response to UV light; LOCATED IN nucleus; EXPRESSED I	unnamed protein product [Thellungiella halophila]
BnaC03g31970D	AT4G00720	ASK8	chrC03:19661687 - 19665138	shaggylike protein kinase 32 (SK32); FUNCTIONS IN kinase activity; INVOLVED IN response to brassinosteroid stimulus; LOCATED IN cytosol, nucleus; EXPRESSED IN 26 plant structures; EXPRESSED DURING 15 growth stages; CONTAINS InterPro DOMAIN/s Protein kinas	RecName
BnaC03g31990D	AT1G22200	--	chrC03:19669362 - 19672615	Endoplasmic reticulum vesicle transporter protein; FUNCTIONS IN	molecular_function unknown; INVOLVED IN
BnaC03g32000D	AT4G00710	BSK3	chrC03:19674646 - 19677130	BRsignaling kinase 3 (BSK3); FUNCTIONS IN binding, protein kinase activity, kinase activity, ATP binding; INVOLVED IN brassinosteroid mediated signaling pathway, Nterminal protein myristoylation; LOCATED IN plasma membrane, membrane; EXPRESSED IN 22 plant	kinase family protein [Arabidopsis lyrata subsp. lyrata] >gi|297320855|gb|EFH51277.1| kinase family protein [Arabidopsis lyrata subsp. lyrata]
BnaC03g32010D	AT4G00700	--	chrC03:19678005 - 19681160	C2 calcium/lipidbinding plant phosphoribosyltransferase family protein; CONTAINS InterPro DOMAIN/s C2 membrane targeting protein (InterProIPR018029), C2 calcium/lipidbinding domain, CaLB (InterProIPR008973), Phosphoribosyltransferase Cterminal (InterProIP	C2 domain
BnaC03g32020D	AT4G00670	--	chrC03:19689690 - 19690264	Remorin family protein; CONTAINS InterPro DOMAIN/s Remorin, Cterminal (InterProIPR005516); BEST Arabidopsis thaliana protein match is Remorin family protein (TAIRAT3G61260.1); Has 353 Blast hits to 353 proteins in 28 species Archae 0; Bacteria 2; Metazo	Remorin family protein [Arabidopsis thaliana] >gi|48310044|gb|AAT41742.1| At4g00670 [Arabidopsis thaliana] >gi|54606860|gb|AAV34778.1| At4g00670 [Arabidopsis thaliana] >gi|332656517|gb|AEE81917.1| Remorin family protein [Arabidopsis thaliana]
BnaC03g32030D	AT4G00660	RH8	chrC03:19691157 - 19694032	RNAhelicaselike 8 (RH8); FUNCTIONS IN helicase activity, nucleic acid binding, ATP binding, ATPdependent helicase activity; INVOLVED IN viral reproduction, virushost interaction; EXPRESSED IN 24 plant structures; EXPRESSED DURING 15 growth stages; CONTAIN	DEAD
BnaC03g32040D	AT1G13120	GLE1	chrC03:19694403 - 19695905	FUNCTIONS IN	molecular_function unknown; INVOLVED IN
BnaC03g32050D	AT4G00585	--	chrC03:19700013 - 19701174	unknown protein; Has 47 Blast hits to 47 proteins in 22 species	Archae
BnaC03g32060D	AT4G00525	--	chrC03:19712092 - 19713273	unknown protein; Has 35333 Blast hits to 34131 proteins in 2444 species	Archae
BnaC03g32070D	AT4G00520	--	chrC03:19713329 - 19717021	AcylCoA thioesterase family protein; FUNCTIONS IN acylCoA thioesterase activity; INVOLVED IN acylCoA metabolic process; EXPRESSED IN 23 plant structures; EXPRESSED DURING 13 growth stages; CONTAINS InterPro DOMAIN/s Cyclic nucleotidebinding (InterProIPR00	predicted protein [Arabidopsis lyrata subsp. lyrata] >gi|297320860|gb|EFH51282.1| predicted protein [Arabidopsis lyrata subsp. lyrata]
BnaC03g32080D	AT4G00500	--	chrC03:19717697 - 19719580	alpha/betaHydrolases superfamily protein; FUNCTIONS IN triglyceride lipase activity, calmodulin binding; INVOLVED IN lipid catabolic process, lipid metabolic process; LOCATED IN endomembrane system; EXPRESSED IN 21 plant structures; EXPRESSED DURING 9 gro	alpha/beta
BnaC03g32090D	AT4G00480	BHLH12	chrC03:19728839 - 19732458	ATMYC1; FUNCTIONS IN DNA binding, sequencespecific DNA binding transcription factor activity; INVOLVED IN regulation of transcription; LOCATED IN nucleus; EXPRESSED IN 21 plant structures; EXPRESSED DURING 12 growth stages; CONTAINS InterPro DOMAIN/s Heli	MYC1 [Arabidopsis thaliana] >gi|334262820|gb|AEG74489.1| MYC1 [Arabidopsis thaliana] >gi|334262880|gb|AEG74519.1| MYC1 [Arabidopsis thaliana]
BnaC03g32100D	AT4G00460	ROPGEF3	chrC03:19732508 - 19737507	RHO guanylnucleotide exchange factor 3 (ROPGEF3); CONTAINS InterPro DOMAIN/s Rop nucleotide exchanger, PRONE (InterProIPR005512); BEST Arabidopsis thaliana protein match is RHO guanylnucleotide exchange factor 2 (TAIRAT1G01700.1); Has 30201 Blast hits to	At4g00460 [Arabidopsis lyrata subsp. lyrata] >gi|297318788|gb|EFH49210.1| At4g00460 [Arabidopsis lyrata subsp. lyrata]
BnaC03g32110D	AT4G00450	CRP	chrC03:19742265 - 19751524	CENTER CITY (CCT); FUNCTIONS IN RNA polymerase II transcription mediator activity; INVOLVED IN photoperiodism, flowering, regulation of development, heterochronic, regulation of radial pattern formation; LOCATED IN mediator complex, chloroplast; EXPRESSED	unnamed protein product [Vitis vinifera]
BnaC03g32120D	AT4G00440	--	chrC03:19754873 - 19757629	FUNCTIONS IN	molecular_function unknown; INVOLVED IN
BnaC03g32130D	AT4G00430	PIP1.4	chrC03:19779031 - 19780668	plasma membrane intrinsic protein 1;4 (PIP1;4); FUNCTIONS IN water channel activity; INVOLVED IN response to water deprivation, transport; LOCATED IN plasma membrane, membrane; EXPRESSED IN 23 plant structures; EXPRESSED DURING 13 growth stages; CONTAINS	trans
BnaC03g32140D	AT4G00370	PHT44	chrC03:19781093 - 19784376	ANTR2; FUNCTIONS IN organic anion transmembrane transporter activity, inorganic phosphate transmembrane transporter activity; INVOLVED IN transmembrane transport; LOCATED IN chloroplast, plastid; EXPRESSED IN 23 plant structures; EXPRESSED DURING 13 growt	inorganic phosphate transporter PHT4;4 [Arabidopsis thaliana] >gi|75244391|sp|Q8GX78.1|ANTR2_ARATH RecName Full=Probable anion transporter 2, chloroplastic; AltName Full=Phosphate transporter PHT4;4; Flags Precursor >gi|26451814|dbj|BAC43000.1| unknown pr
BnaC03g32150D	AT4G00355	--	chrC03:19784678 - 19787864	unknown protein; BEST Arabidopsis thaliana protein match is	unknown protein (TAIR
BnaC03g32160D	AT4G00170	PVA13	chrC03:19790875 - 19792493	Plant VAMP (vesicleassociated membrane protein) family protein; FUNCTIONS IN structural molecule activity; INVOLVED IN biological_process unknown; LOCATED IN cellular_component unknown; EXPRESSED IN 24 plant structures; EXPRESSED DURING 14 growth stages;	vesicleassociated protein 13 [Arabidopsis thaliana] >gi|75148826|sp|Q84WW5.1|VAP13_ARATH RecName Full=Vesicleassociated protein 13; AltName Full=Plant VAP homolog 13; Short=AtPVA13; AltName Full=VAMPassociated protein 13; Contains RecName Full=Vesicleasso
BnaC03g32180D	AT4G00120	IND	chrC03:19803033 - 19803621	INDEHISCENT (IND); FUNCTIONS IN DNA binding, sequencespecific DNA binding transcription factor activity; INVOLVED IN polar nucleus fusion, regulation of transcription; LOCATED IN nucleus; CONTAINS InterPro DOMAIN/s Helixloophelix DNAbinding domain (InterP	bHLH transcription factor [Brassica oleracea]
BnaC03g32190D	AT4G00050	UNE10	chrC03:19819115 - 19821557	unfertilized embryo sac 10 (UNE10); FUNCTIONS IN DNA binding, sequencespecific DNA binding transcription factor activity; INVOLVED IN double fertilization forming a zygote and endosperm, regulation of transcription; LOCATED IN nucleus; EXPRESSED IN 20 pla	putative bHLH transcription factor [Arabidopsis thaliana]
BnaC08g08290D	AT4G14020	--	chrC08:12367041 - 12367597	Rapid alkalinization factor (RALF) family protein; CONTAINS InterPro DOMAIN/s	Rapid ALkalinization Factor (InterPro
BnaC08g08300D	AT4G14030	SBP1	chrC08:12372785 - 12374791	seleniumbinding protein 1 (SBP1); FUNCTIONS IN selenium binding; INVOLVED IN response to cadmium ion, response to hydrogen peroxide, cellular response to selenium ion, sulfate assimilation; LOCATED IN cellular_component unknown; EXPRESSED IN guard cell; CONTAINS InterPro DOMAIN/s Cytochrome cd1nitrite reductaselike, Cterminal haem d1 (InterProIPR011048), Seleniumbinding protein (InterProIPR008826…	seleniumbinding protein, partial [Eutrema halophilum]
BnaC08g08310D	AT4G14030	SBP1	chrC08:12384908 - 12386307	seleniumbinding protein 1 (SBP1); FUNCTIONS IN selenium binding; INVOLVED IN response to cadmium ion, response to hydrogen peroxide, cellular response to selenium ion, sulfate assimilation; LOCATED IN cellular_component unknown; EXPRESSED IN guard cell; CONTAINS InterPro DOMAIN/s Cytochrome cd1nitrite reductaselike, Cterminal haem d1 (InterProIPR011048), Seleniumbinding protein (InterProIPR008826…	putative selenium
BnaC08g08320D	AT4G14040	SBP2	chrC08:12425940 - 12428358	seleniumbinding protein 2 (SBP2); FUNCTIONS IN selenium binding; INVOLVED IN polar nucleus fusion; LOCATED IN cellular_component unknown; EXPRESSED IN guard cell; EXPRESSED DURING seedling growth; CONTAINS InterPro DOMAIN/s Cytochrome cd1nitrite reductaselike, Cterminal haem d1 (InterProIPR011048), Seleniumbinding protein (InterProIPR008826); BEST Arabidopsis thaliana protein match is seleniumbin…	probable selenium
BnaC08g08330D	AT4G14050	PCMP-H13	chrC08:12429368 - 12431198	Pentatricopeptide repeat (PPR) superfamily protein; INVOLVED IN	biological_process unknown; LOCATED IN
BnaC08g08340D	AT4G14080	A6	chrC08:12434809 - 12438365	maternal effect embryo arrest 48 (MEE48); FUNCTIONS IN cation binding, hydrolase activity, hydrolyzing Oglycosyl compounds, catalytic activity; INVOLVED IN pollen exine formation, embryo development ending in seed dormancy; LOCATED IN endomembrane system; EXPRESSED IN leaf whorl, sepal, flower, seed; EXPRESSED DURING petal differentiation and expansion stage, E expanded cotyledon stage; CONTAINS …	beta1,3glucanase homologue [Brassica napus]
BnaC08g08350D	AT4G14090	UGT75C1	chrC08:12452626 - 12454000	UDPGlycosyltransferase superfamily protein; FUNCTIONS IN UDPglycosyltransferase activity, UDPglucosyltransferase activity, anthocyanin 5Oglucosyltransferase activity; INVOLVED IN metabolic process; LOCATED IN mitochondrion; EXPRESSED IN 14 plant structures; EXPRESSED DURING 7 growth stages; CONTAINS InterPro DOMAIN/s UDPglucuronosyl/UDPglucosyltransferase (InterProIPR002213); BEST Arabidopsis tha…	putative glucosyltransferase [Arabidopsis thaliana]
BnaC08g08360D	AT4G14110	CSN8	chrC08:12454573 - 12455924	CONSTITUTIVE PHOTOMORPHOGENIC 9 (COP9); CONTAINS InterPro DOMAIN/s COP9 signalosome, subunit CSN8 (InterProIPR019280); Has 218 Blast hits to 218 proteins in 91 species Archae 0; Bacteria 0; Metazoa 136; Fungi 17; Plants 54; Viruses 0; Other Eukaryotes 11 (source NCBI BLink).	COP9 signalosome complex subunit 8 [Brassica napus]
BnaC08g08390D	AT4G14130	XTH15	chrC08:12467531 - 12468650	xyloglucan endotransglucosylase/hydrolase 15 (XTH15); FUNCTIONS IN hydrolase activity, acting on glycosyl bonds, xyloglucanxyloglucosyl transferase activity, hydrolase activity, hydrolyzing Oglycosyl compounds; INVOLVED IN Nterminal protein myristoylation, carbohydrate metabolic process, cellular glucan metabolic process; LOCATED IN endomembrane system, apoplast, cell wall; EXPRESSED IN 23 plant …	probable xyloglucan endotransglucosylase/hydrolase protein 15 [Arabidopsis thaliana] >gi|38605153|sp|Q38911.1|XTH15_ARATH RecName
BnaC08g08400D	AT3G12590	--	chrC08:12493561 - 12495265	unknown protein; INVOLVED IN	biological_process unknown; LOCATED IN
BnaC08g08410D	AT1G11420	ATDUF2	chrC08:12514363 - 12516204	DOMAIN OF UNKNOWN FUNCTION 724 2 (DUF2); FUNCTIONS IN RNA binding; LOCATED IN cellular_component unknown; EXPRESSED IN 26 plant structures; EXPRESSED DURING 12 growth stages; CONTAINS InterPro DOMAIN/s Tudorlike, plant (InterProIPR014002), Agenet (InterProIPR008395), Protein of unknown function DUF724 (InterProIPR007930); BEST Arabidopsis thaliana protein match is DOMAIN OF UNKNOWN FUNCTION 724 6…	predicted protein [Arabidopsis lyrata subsp. lyrata] >gi|297338485|gb|EFH68902.1| predicted protein [Arabidopsis lyrata subsp. lyrata]

## Sheet: Table S6
Table S6 Top enriched GO terms of annotated candidate genes identified in this study within the LD regions surrounding significant SNPs as implemented in ShinyGO v0.82
Enrichment FDR	nGenes	Pathway Genes	Fold Enrichment	Pathway	URL	Genes
0.00224293	2	3	203.483	GO:0008430 Selenium binding	http://amigo.geneontology.org/amigo/term/GO:0008430	AT4G14030 AT4G14040
0.00744951	2	7	87.207	GO:0048629 Trichome patterning	http://amigo.geneontology.org/amigo/term/GO:0048629	AT4G00480 AT5G40330
0.0033589	3	23	39.8119	GO:0004707 MAP kinase activity	http://amigo.geneontology.org/amigo/term/GO:0004707	AT3G14720 AT4G01370 AT5G40440
0.00351034	3	24	38.1531	GO:0010026 Trichome differentiation	http://amigo.geneontology.org/amigo/term/GO:0010026	AT4G01060 AT4G26690 AT5G40330
0.00359005	3	25	36.627	GO:0009932 Cell tip growth	http://amigo.geneontology.org/amigo/term/GO:0009932	AT3G08600 AT4G00460 AT4G26690
[truncated: 15 more rows]
