# Supplementary material for: Genome-wide association mapping reveals genetic loci underlying phenotypic variation in early root vigour improvement by osmopriming in Brassica napus L.
Source: Research Square preprint supplement (doi:10.21203/rs.3.rs-7137420/v1), 2025-07-21
Supplement: Supplementary file 2 [file b3227038510a49b2c7679af5.docx]

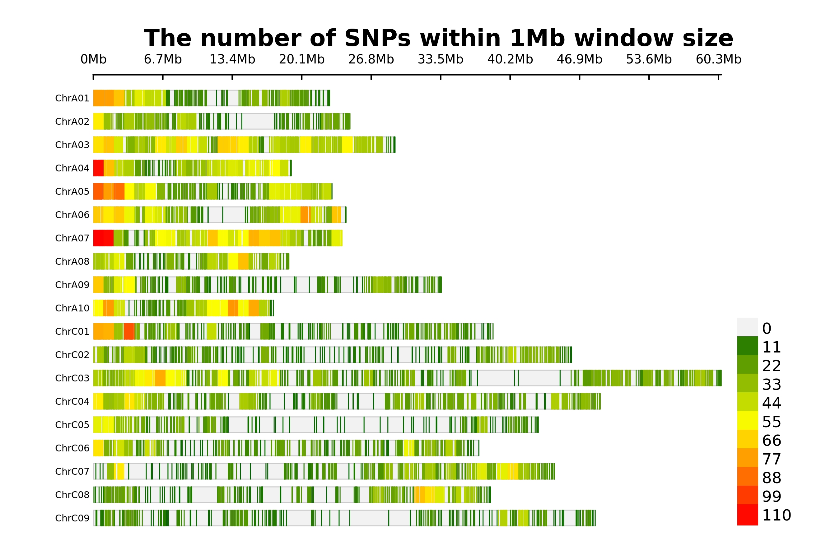


**Figure S1.** Chromosome-wise SNP density plot illustrating the number of SNPs within 1 Mb windows. The horizontal axis represents chromosome length in megabases (Mb), and variations in colour indicate SNP density levels


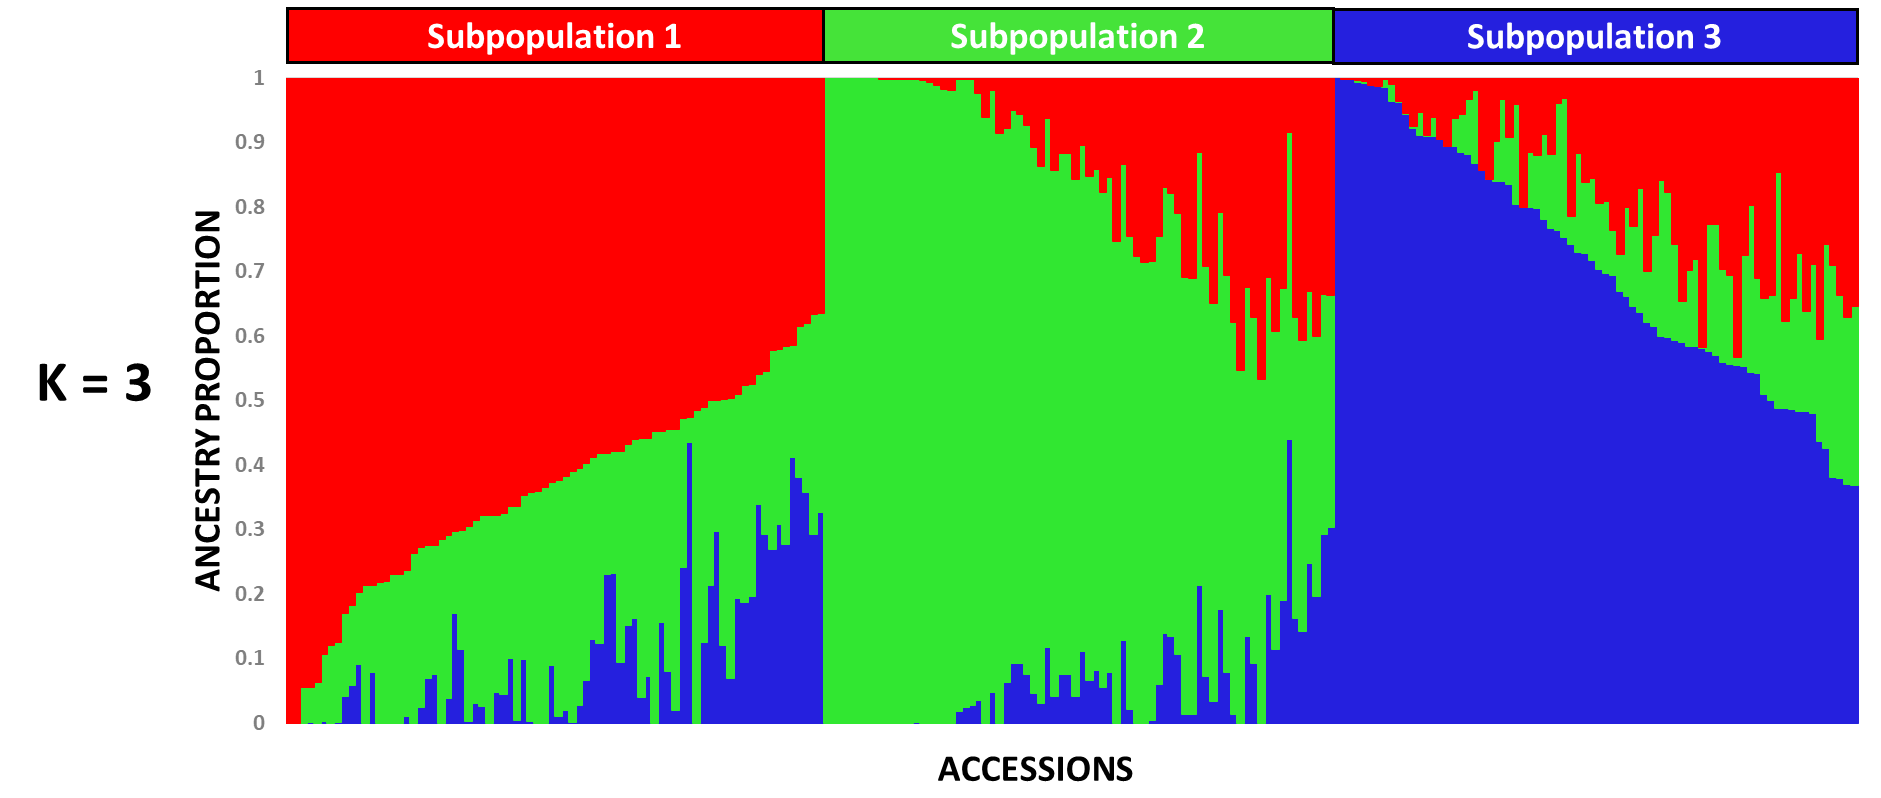


**Figure S2.** Estimated ancestry proportions of accessions at K = 3 based on STRUCTURE analysis


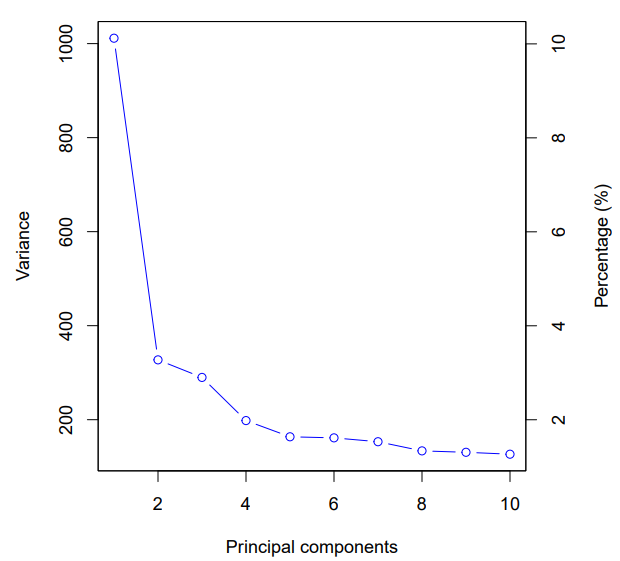


**Figure S3.** Scree plot showing the proportion of genetic variance explained by principal components derived from SNP-based PCA in the GWAS panel


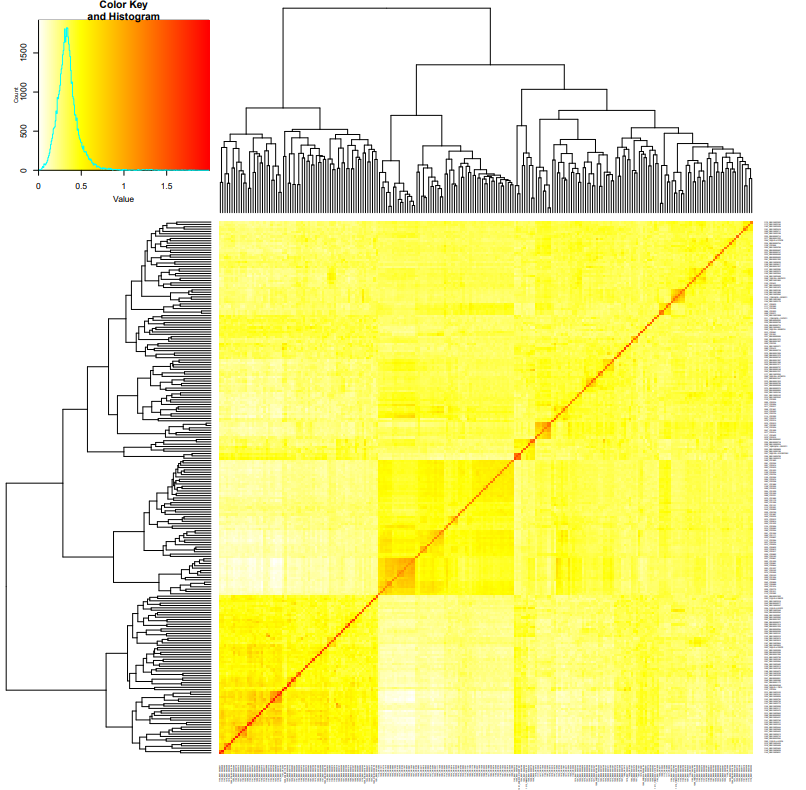


**Figure S4.** Heatmap representation of the kinship matrix illustrating genetic relatedness across the population. Darker regions indicate stronger genetic similarity between individual genotypes.


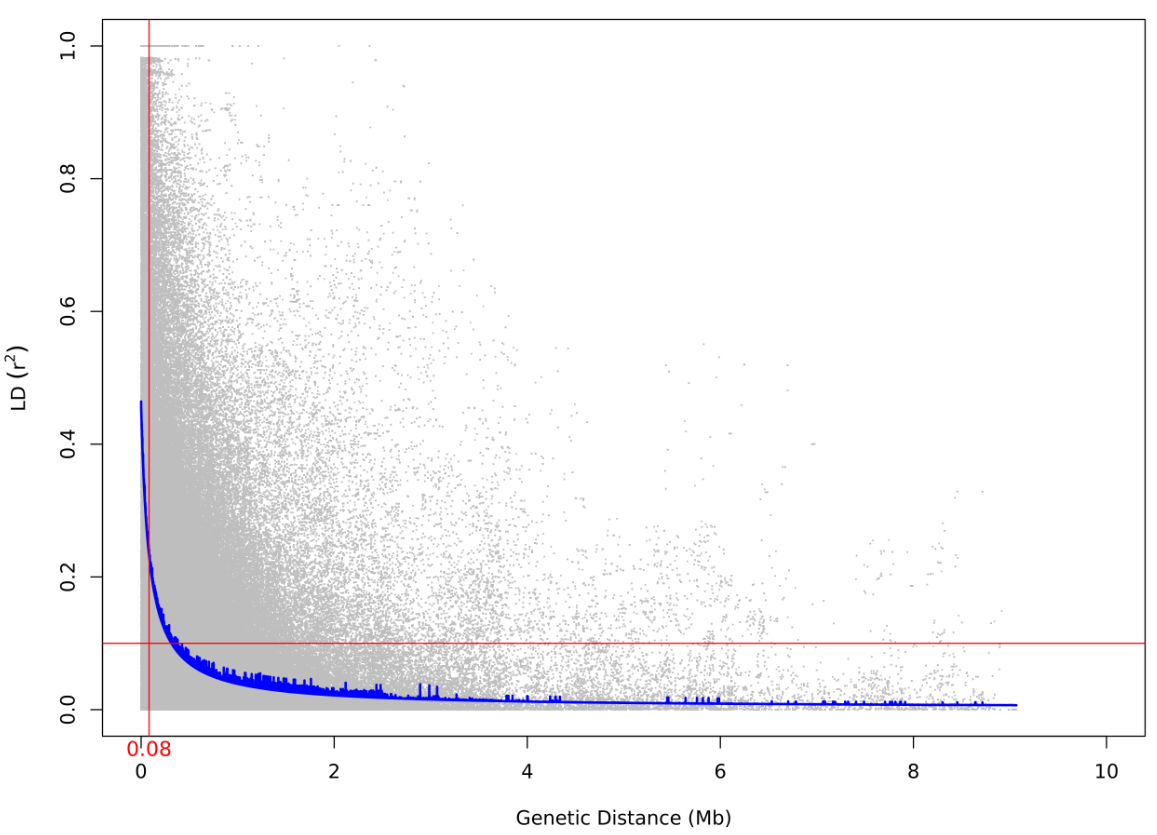


**Figure S5.** LD decay plot for A-subgenome, showing average r² values (y-axis) against physical distance between markers (Mb) on the x-axis, with half-decay observed at 0.08 Mb (~80 kb).


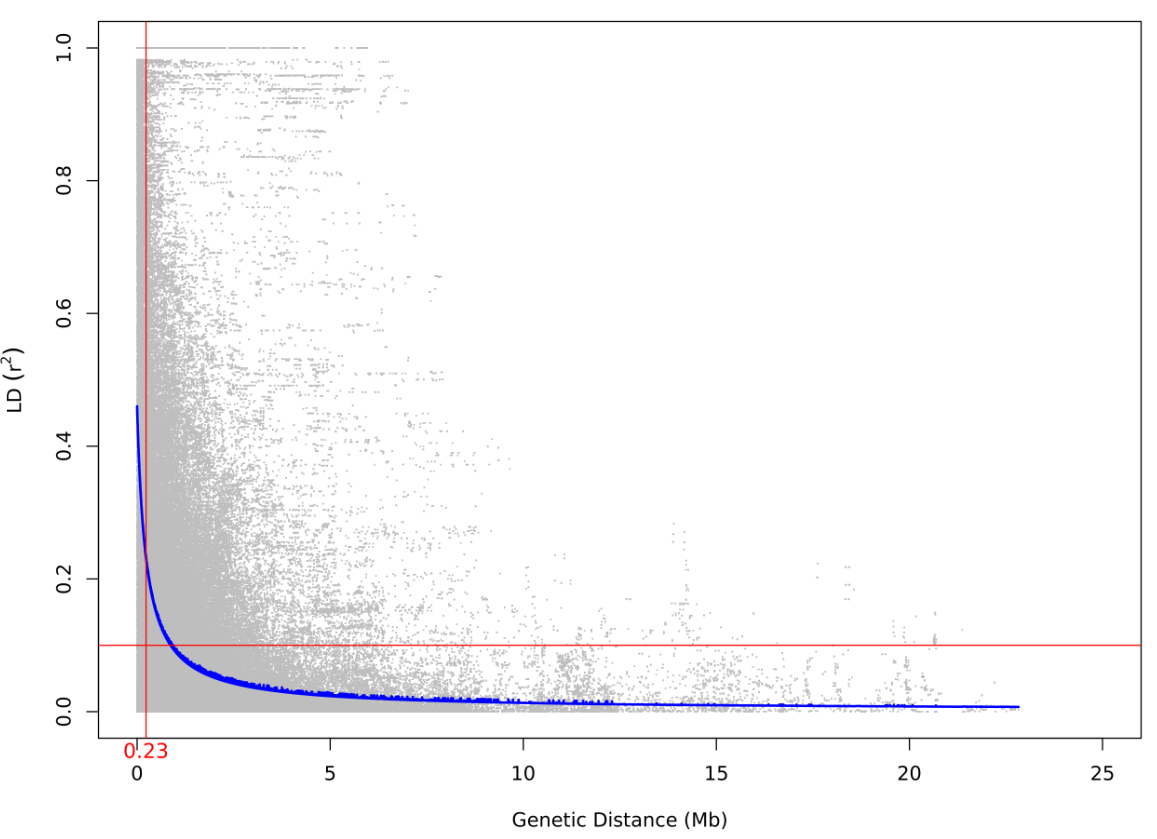


**Figure S6.** LD decay plot for C-subgenome, showing average r² values (y-axis) against physical distance between markers (Mb) on the x-axis, with half-decay observed at 0.23 Mb (~230 kb)

ChrA07 - Bn-A07-p244051 ChrC01 - Bn-scaff_22115_1-p155376


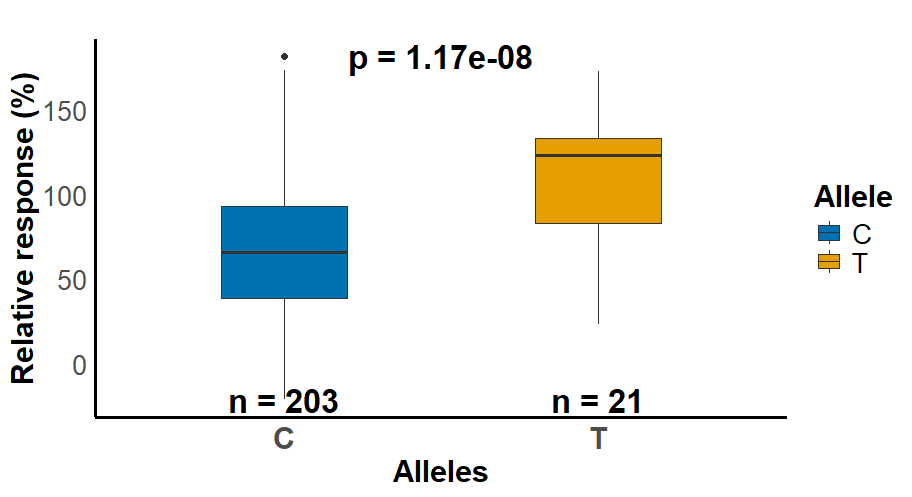

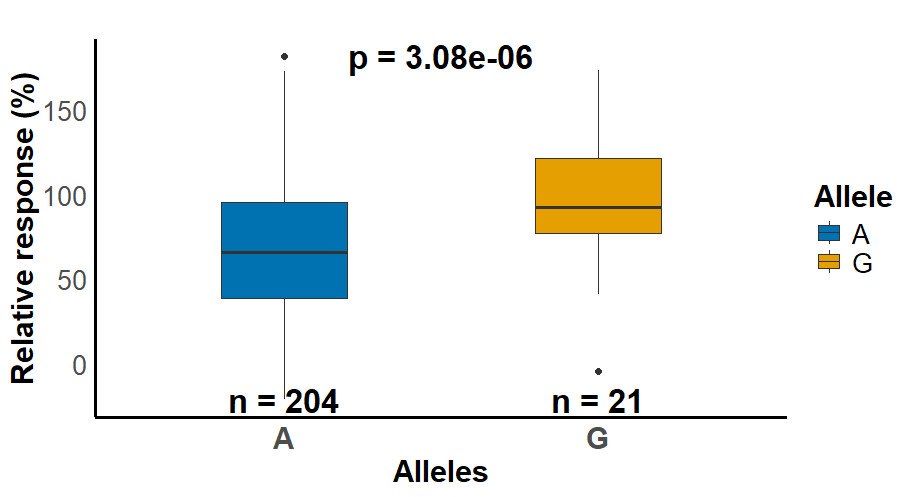


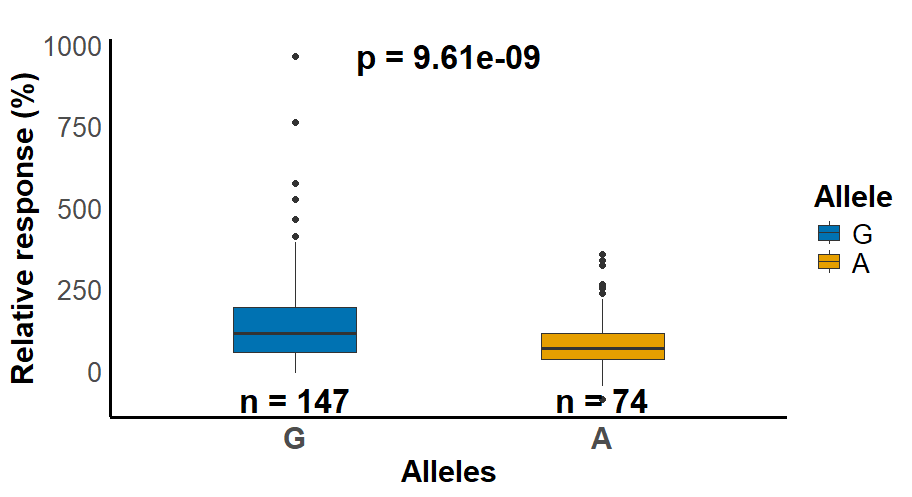

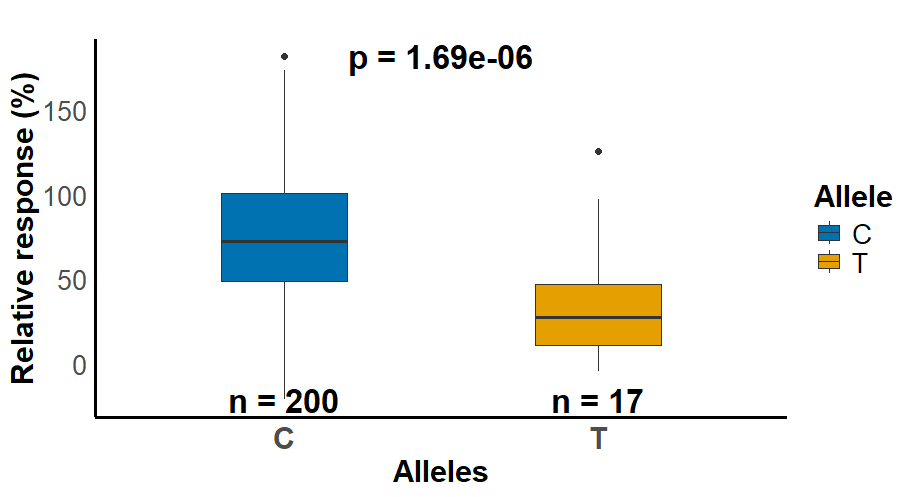
ChrC08 - Bn-C08-p8710166 ChrC02 - Bn-scaff_20942_1-p252525

**Figure S7.** Boxplots of the allelic effects of four SNPs that exceeded the genome-wide significant threshold (-log10 p ≥ 5.48) associated with osmopriming response


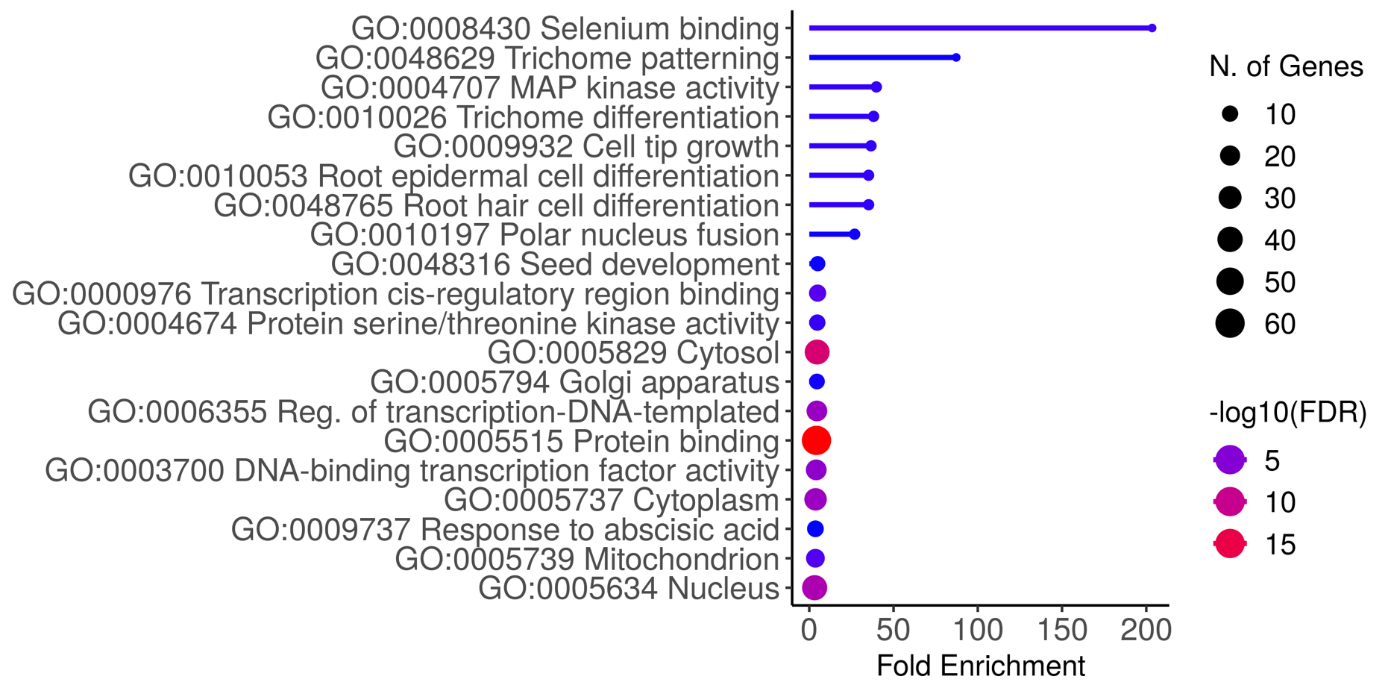


**Figure S8.** Top enriched GO terms for predicted candidate genes within the identified SNP loci associated with response to osmopriming as detected by the GWAS BLINK model significantly enriched at FDR < 0.05
